# Supplementary material for: Genomic and phenotypic evolution of Escherichia coli in a novel citrate-only resource environment
Source: eLife. 2020 May 29;9:e55414. doi: 10.7554/eLife.55414 (PMC7299349; doi:10.7554/eLife.55414)
Supplement: Figure 2—source data 1. [file elife-55414-fig2-data1.csv]

Clone	Mutation	Gene	Position	Environment	Population
ZDBp910	MOB	priC	464051	DM25	DM25-1
ZDBp910	DEL	[ECB_00524]–ybdK	568370	DM25	DM25-1
ZDBp910	DEL	gltL/insJ-2	665709	DM25	DM25-1
ZDBp910	MOB	gltA/sdhC	736640	DM25	DM25-1
ZDBp910	MOB	tyrP/yecA	1968587	DM25	DM25-1
ZDBp910	MOB	yehZ	2112669	DM25	DM25-1
ZDBp910	MOB	menC	2264348	DM25	DM25-1
ZDBp910	MOB	hyfA	2465970	DM25	DM25-1
ZDBp910	MOB	hyfB	2466822	DM25	DM25-1
ZDBp910	MOB	yqjA	3109394	DM25	DM25-1
ZDBp910	MOB	nlpI/pnp	3172540	DM25	DM25-1
ZDBp910	MOB	yhiO/uspA	3501576	DM25	DM25-1
ZDBp910	DEL	[tag]–hokA	3574917	DM25	DM25-1
ZDBp910	intergenic	yidB/gyrB	3770320	DM25	DM25-1
ZDBp910	MOB	aceB	4123868	DM25	DM25-1
ZDBp912	MOB	hupB/ppiD	435258	DM25	DM25-3
ZDBp912	MOB	ybbO	492501	DM25	DM25-3
ZDBp912	MOB	ybcL	544593	DM25	DM25-3
ZDBp912	DEL	gltL/insJ-2	665708	DM25	DM25-3
ZDBp912	MOB	dinI	1137051	DM25	DM25-3
ZDBp912	DEL	ldrB/insK-2	1271135	DM25	DM25-3
ZDBp912	MOB	menC	2264346	DM25	DM25-3
ZDBp912	MOB	menC	2264348	DM25	DM25-3
ZDBp912	MOB	yfhG	2553002	DM25	DM25-3
ZDBp912	MOB	ygeD	2812156	DM25	DM25-3
ZDBp912	MOB	ygfH	2896913	DM25	DM25-3
ZDBp912	MOB	glcB	2978663	DM25	DM25-3
ZDBp912	synonymous	yhfR	3362135	DM25	DM25-3
ZDBp912	MOB	yhhL	3466937	DM25	DM25-3
ZDBp912	MOB	yhiO/uspA	3501576	DM25	DM25-3
ZDBp912	DEL	glpF	4022848	DM25	DM25-3
ZDBp912	nonsynonymous	rpoC	4095055	DM25	DM25-3
ZDBp912	INS	fklB/cycA	4342160	DM25	DM25-3
ZDBp913	MOB	betA	300764	DM25	DM25-4
ZDBp913	MOB	cusS	574297	DM25	DM25-4
ZDBp913	DEL	ybdK/insJ-1	588070	DM25	DM25-4
ZDBp913	DEL	[acpD]–insJ-2	1457389	DM25	DM25-4
ZDBp913	MOB	yobG/ECB_01797	1887034	DM25	DM25-4
ZDBp913	MOB	yeeJ	1988168	DM25	DM25-4
ZDBp913	DEL	yegL/ECB_02013	2062617	DM25	DM25-4
ZDBp913	MOB	yehM	2099889	DM25	DM25-4
ZDBp913	MOB	csrA/alaS	2659020	DM25	DM25-4
ZDBp913	MOB	ygfH	2896927	DM25	DM25-4
ZDBp913	MOB	yghK/glcB	2976836	DM25	DM25-4
ZDBp913	MOB	yqjA	3109394	DM25	DM25-4
ZDBp913	nonsynonymous	rpoB	4091159	DM25	DM25-4
ZDBp913	MOB	aceB	4122888	DM25	DM25-4
ZDBp921	SUB	insL-2/lon	432291	DM25	DM25+6
ZDBp921	DEL	insL-2/lon	432296	DM25	DM25+6
ZDBp921	DEL	insL-2/lon	432301	DM25	DM25+6
ZDBp921	MOB	priC	464051	DM25	DM25+6
ZDBp921	DEL	[ybcN]–[insK-1]	546183	DM25	DM25+6
ZDBp921	INS	gltA/sdhC	736633	DM25	DM25+6
ZDBp921	MOB	dinI	1137052	DM25	DM25+6
ZDBp921	DEL	acpD	1457392	DM25	DM25+6
ZDBp921	MOB	yehZ	2112669	DM25	DM25+6
ZDBp921	nonsynonymous	yfaX	2250174	DM25	DM25+6
ZDBp921	MOB	yqjA	3109394	DM25	DM25+6
ZDBp921	MOB	thiC	4101561	DM25	DM25+6
ZDBp921	DEL	aceA	4124014	DM25	DM25+6
ZDBp921	DEL	dcuS	4256901	DM25	DM25+6
ZDBp921	MOB	idnT	4403966	DM25	DM25+6
ZDBp911	MOB	cusS	573826	DM25	DM25-2
ZDBp911	MOB	gltA/sdhC	736587	DM25	DM25-2
ZDBp911	intergenic	ynaE/ynaF	1429178	DM25	DM25-2
ZDBp911	DEL	[acpD]–insJ-2	1457389	DM25	DM25-2
ZDBp911	MOB	mglB	2132618	DM25	DM25-2
ZDBp911	MOB	menC	2264348	DM25	DM25-2
ZDBp911	MOB	aceB	4123868	DM25	DM25-2
ZDBp911	MOB	yjiX/yjiY	4456970	DM25	DM25-2
ZDBp920	MOB	priC	464051	DM25	DM25+5
ZDBp920	DEL	[ybcU]–[insK-1]	549926	DM25	DM25+5
ZDBp920	DEL	ybeF	642939	DM25	DM25+5
ZDBp920	DEL	gltL/insJ-2	665708	DM25	DM25+5
ZDBp920	nonsynonymous	gltA	735392	DM25	DM25+5
ZDBp920	intergenic	ECB_00825/ECB_00826	889395	DM25	DM25+5
ZDBp920	MOB	dinI	1137050	DM25	DM25+5
ZDBp920	DEL	[acpD]–insJ-2	1457389	DM25	DM25+5
ZDBp920	DEL	ydhY	1729741	DM25	DM25+5
ZDBp920	DEL	yegL/ECB_02013	2062617	DM25	DM25+5
ZDBp920	nonsynonymous	yphG	2544924	DM25	DM25+5
ZDBp920	DEL	[ECB_02797]–[ECB_02816]	2942822	DM25	DM25+5
ZDBp920	MOB	yqjA	3109394	DM25	DM25+5
ZDBp920	MOB	yhiO/uspA	3501576	DM25	DM25+5
ZDBp920	intergenic	yidB/gyrB	3770422	DM25	DM25+5
ZDBp920	DEL	aceB	4122799	DM25	DM25+5
ZDBp920	DEL	dcuS	4256901	DM25	DM25+5
ZDBp917	DEL	[ybcU]–[insK-1]	549926	DM25	DM25+2
ZDBp917	DEL	gltL/insJ-2	665705	DM25	DM25+2
ZDBp917	intergenic	gltA/sdhC	736739	DM25	DM25+2
ZDBp917	DEL	[ynbD]–[acpD]	1455172	DM25	DM25+2
ZDBp917	DEL	yebK	1915305	DM25	DM25+2
ZDBp917	INS	yfiH	2600587	DM25	DM25+2
ZDBp917	MOB	yhgF/feoA	3398568	DM25	DM25+2
ZDBp917	nonsynonymous	rpoB	4091094	DM25	DM25+2
ZDBp917	MOB	aceB	4122957	DM25	DM25+2
ZDBp917	nonsynonymous	yjbB	4134124	DM25	DM25+2
ZDBp917	INS	smp/insJ-2	4502903	DM25	DM25+2
ZDBp916	DEL	[ybcU]–[insK-1]	549926	DM25	DM25+1
ZDBp916	intergenic	gltA/sdhC	736735	DM25	DM25+1
ZDBp916	DEL	ldrB	1270529	DM25	DM25+1
ZDBp916	DEL	[acpD]–insJ-2	1457389	DM25	DM25+1
ZDBp916	INS	ydhY	1729739	DM25	DM25+1
ZDBp916	MOB	mglB	2133568	DM25	DM25+1
ZDBp916	MOB	fhlA	2694867	DM25	DM25+1
ZDBp916	DEL	yqeB	2844380	DM25	DM25+1
ZDBp916	intergenic	yhgE/pckA	3391209	DM25	DM25+1
ZDBp916	MOB	yhiO/uspA	3501576	DM25	DM25+1
ZDBp916	MOB	[aceB]	4123908	DM25	DM25+1
ZDBp916	MOB	yjcH	4191234	DM25	DM25+1
ZDBp914	INS	mokC/insJ-2	16990	DM25	DM25-5
ZDBp914	synonymous	yaiV	363636	DM25	DM25-5
ZDBp914	MOB	ybcL	544481	DM25	DM25-5
ZDBp914	DEL	[ybcU]–[insK-1]	549926	DM25	DM25-5
ZDBp914	MOB	gltA/sdhC	736642	DM25	DM25-5
ZDBp914	pseudogene	ydhY	1729737	DM25	DM25-5
ZDBp914	nonsynonymous	wzc	2043155	DM25	DM25-5
ZDBp914	MOB	mglB	2132724	DM25	DM25-5
ZDBp914	MOB	fhlA	2694135	DM25	DM25-5
ZDBp914	intergenic	yhgE/pckA	3391153	DM25	DM25-5
ZDBp914	nonsynonymous	glgC	3429514	DM25	DM25-5
ZDBp914	synonymous	yhiW	3524609	DM25	DM25-5
ZDBp914	INS	hokA/insJ-4	3582219	DM25	DM25-5
ZDBp914	DEL	aceB	4122388	DM25	DM25-5
ZDBp914	DEL	dcuS	4256901	DM25	DM25-5
ZDBp915	MOB	yahM	319673	DM25	DM25-6
ZDBp915	nonsynonymous	ybbO	492684	DM25	DM25-6
ZDBp915	DEL	[cusA]–ybdK	581931	DM25	DM25-6
ZDBp915	MOB	entF	600001	DM25	DM25-6
ZDBp915	DEL	ybeF	642823	DM25	DM25-6
ZDBp915	DEL	gltL/insJ-2	665708	DM25	DM25-6
ZDBp915	MOB	gltA	734998	DM25	DM25-6
ZDBp915	MOB	ycdS	1107553	DM25	DM25-6
ZDBp915	MOB	ycfH/ptsG	1173387	DM25	DM25-6
ZDBp915	nonsynonymous	insF-2	1447820	DM25	DM25-6
ZDBp915	DEL	[acpD]–insJ-2	1457389	DM25	DM25-6
ZDBp915	intergenic	adhP/sfcA	1534643	DM25	DM25-6
ZDBp915	MOB	menC	2264348	DM25	DM25-6
ZDBp915	INS	yfiH	2600587	DM25	DM25-6
ZDBp915	MOB	araE	2820985	DM25	DM25-6
ZDBp915	MOB	yqjA	3109394	DM25	DM25-6
ZDBp915	DEL	livK/yhhK	3459518	DM25	DM25-6
ZDBp915	nonsynonymous	yhiQ	3504875	DM25	DM25-6
ZDBp915	MOB	wzzE/wecB	3857836	DM25	DM25-6
ZDBp915	MOB	frvR	3993788	DM25	DM25-6
ZDBp915	MOB	mdoB	4478024	DM25	DM25-6
ZDBp919	DEL	gltL/insJ-2	665709	DM25	DM25+4
ZDBp919	intergenic	focA/ycaO	972660	DM25	DM25+4
ZDBp919	DEL	[acpD]–insJ-2	1457389	DM25	DM25+4
ZDBp919	nonsynonymous	mglB	2133584	DM25	DM25+4
ZDBp919	MOB	menC	2264346	DM25	DM25+4
ZDBp919	MOB	csrA/alaS	2659020	DM25	DM25+4
ZDBp919	INS	kup/insJ-5	3825950	DM25	DM25+4
ZDBp919	INS	insK-5/yieO	3827398	DM25	DM25+4
ZDBp919	nonsense	aceB	4122539	DM25	DM25+4
ZDBp919	DEL	cycA	4343098	DM25	DM25+4
ZDBp919	MOB	yjiX/yjiY	4456970	DM25	DM25+4
ZDBp918	MOB	insL-2/lon	432359	DM25	DM25+3
ZDBp918	MOB	priC	464051	DM25	DM25+3
ZDBp918	intergenic	gltA/sdhC	736294	DM25	DM25+3
ZDBp918	MOB	ycfH/ptsG	1173387	DM25	DM25+3
ZDBp918	DEL	[acpD]–insJ-2	1457389	DM25	DM25+3
ZDBp918	MOB	metA/aceB	4122222	DM25	DM25+3
ZDBp918	MOB	gltP	4201689	DM25	DM25+3
ZDBp883	MOB	fadE	247779	DM0	DM0-5
ZDBp883	MOB	cusB	579159	DM0	DM0-5
ZDBp883	DEL	hokE–[entF]	590047	DM0	DM0-5
ZDBp883	SUB	yhhI	719392	DM0	DM0-5
ZDBp883	pseudogene	yhhI	719413	DM0	DM0-5
ZDBp883	nonsynonymous	gltA	735104	DM0	DM0-5
ZDBp883	DEL	[acpD]–insJ-2	1457389	DM0	DM0-5
ZDBp883	MOB	ydeP/ydeQ	1567292	DM0	DM0-5
ZDBp883	MOB	yehM	2099889	DM0	DM0-5
ZDBp883	nonsynonymous	atoS	2209853	DM0	DM0-5
ZDBp883	MOB	fadL	2348064	DM0	DM0-5
ZDBp883	nonsynonymous	iscR	2526007	DM0	DM0-5
ZDBp883	DEL	insJ-3/cysH	2720682	DM0	DM0-5
ZDBp883	MOB	yqjA	3109394	DM0	DM0-5
ZDBp883	DEL	nlpI	3172495	DM0	DM0-5
ZDBp883	DEL	smf	3290790	DM0	DM0-5
ZDBp883	MOB	yhiO/uspA	3501576	DM0	DM0-5
ZDBp883	MOB	yicC	3687738	DM0	DM0-5
ZDBp883	DEL	kup/insJ-5	3825949	DM0	DM0-5
ZDBp883	synonymous	ytfM	4356267	DM0	DM0-5
ZDBp883	MOB	yjiX/yjiY	4456967	DM0	DM0-5
ZDBp880	DEL	[ybcU]–[insK-1]	549926	DM0	DM0-4
ZDBp880	DEL	ybeF	642935	DM0	DM0-4
ZDBp880	nonsynonymous	gltA	735765	DM0	DM0-4
ZDBp880	MOB	nhaB/fadR	1236016	DM0	DM0-4
ZDBp880	MOB	rpsV	1536594	DM0	DM0-4
ZDBp880	MOB	mglB	2133567	DM0	DM0-4
ZDBp880	MOB	yfcJ	2325035	DM0	DM0-4
ZDBp880	DEL	yhbE/insJ-2	3196333	DM0	DM0-4
ZDBp880	MOB	yhiO/uspA	3501576	DM0	DM0-4
ZDBp880	MOB	yihS	3975518	DM0	DM0-4
ZDBp877	nonsynonymous	prpB	323378	DM0	DM0-3
ZDBp877	MOB	ECB_00515	557465	DM0	DM0-3
ZDBp877	nonsynonymous	gltA	735765	DM0	DM0-3
ZDBp877	intergenic	cspD/clpS	940328	DM0	DM0-3
ZDBp877	nonsynonymous	ompF	1004674	DM0	DM0-3
ZDBp877	MOB	dinI	1137052	DM0	DM0-3
ZDBp877	intergenic	ycfP/ndh	1181558	DM0	DM0-3
ZDBp877	MOB	cls	1307420	DM0	DM0-3
ZDBp877	DEL	[acpD]–insJ-2	1457389	DM0	DM0-3
ZDBp877	MOB	yobG/ECB_01797	1887041	DM0	DM0-3
ZDBp877	MOB	yeeJ	1988179	DM0	DM0-3
ZDBp877	MOB	fadL	2348048	DM0	DM0-3
ZDBp877	MOB	hyfA	2465970	DM0	DM0-3
ZDBp877	nonsynonymous	yfhQ	2527313	DM0	DM0-3
ZDBp877	INS	yfhR/csiE	2529490	DM0	DM0-3
ZDBp877	MOB	yggG	2914014	DM0	DM0-3
ZDBp877	MOB	nlpI/pnp	3172540	DM0	DM0-3
ZDBp877	MOB	yhiO/uspA	3501576	DM0	DM0-3
ZDBp877	intergenic	dctA/yhjK	3544110	DM0	DM0-3
ZDBp877	MOB	gltS/yicE	3700202	DM0	DM0-3
ZDBp877	MOB	yidI	3748889	DM0	DM0-3
ZDBp875	MOB	cusS	574068	DM0	DM0-2
ZDBp875	DEL	hokE–[entD]	590047	DM0	DM0-2
ZDBp875	nonsynonymous	gltA	735580	DM0	DM0-2
ZDBp875	intergenic	gltA/sdhC	736619	DM0	DM0-2
ZDBp875	MOB	ybjR	923149	DM0	DM0-2
ZDBp875	nonsynonymous	ompF	1004636	DM0	DM0-2
ZDBp875	MOB	nhaB/fadR	1236018	DM0	DM0-2
ZDBp875	MOB	hns/tdk	1294964	DM0	DM0-2
ZDBp875	nonsynonymous	cysB	1334535	DM0	DM0-2
ZDBp875	DEL	[acpD]–[ydcI]	1457389	DM0	DM0-2
ZDBp875	MOB	ynfH	1640803	DM0	DM0-2
ZDBp875	MOB	yobG/ECB_01797	1887034	DM0	DM0-2
ZDBp875	MOB	yebZ	1902189	DM0	DM0-2
ZDBp875	nonsynonymous	pta	2302013	DM0	DM0-2
ZDBp875	MOB	fadL	2347259	DM0	DM0-2
ZDBp875	DEL	[ECB_02836]–[yghK]	2963466	DM0	DM0-2
ZDBp875	MOB	yhiO/uspA	3501576	DM0	DM0-2
ZDBp875	MOB	yihS	3975518	DM0	DM0-2
ZDBp875	nonsynonymous	yjcF	4188718	DM0	DM0-2
ZDBp875	MOB	lysU	4260612	DM0	DM0-2
ZDBp875	DEL	cycA	4343098	DM0	DM0-2
ZDBp901	intergenic	fadE/lpcA	249356	DM0	DM0+5
ZDBp901	MOB	priC	464051	DM0	DM0+5
ZDBp901	MOB	asnB	681779	DM0	DM0+5
ZDBp901	nonsynonymous	gltA	735572	DM0	DM0+5
ZDBp901	nonsynonymous	gltA	736121	DM0	DM0+5
ZDBp901	MOB	ybjR	923167	DM0	DM0+5
ZDBp901	INS	ycgF	1216074	DM0	DM0+5
ZDBp901	DEL	[acpD]–insJ-2	1457389	DM0	DM0+5
ZDBp901	MOB	yqjA	3109394	DM0	DM0+5
ZDBp901	MOB	yhiO	3501352	DM0	DM0+5
ZDBp901	nonsynonymous	rpoB	4090512	DM0	DM0+5
ZDBp901	MOB	aceB	4122754	DM0	DM0+5
ZDBp901	nonsynonymous	yjbB	4134638	DM0	DM0+5
ZDBp901	DEL	dcuS	4256901	DM0	DM0+5
ZDBp901	MOB	mdoB	4478024	DM0	DM0+5
ZDBp898	MOB	yacC	140966	DM0	DM0+4
ZDBp898	MOB	htpG	468912	DM0	DM0+4
ZDBp898	DEL	ybeF	642809	DM0	DM0+4
ZDBp898	nonsynonymous	gltA	735797	DM0	DM0+4
ZDBp898	MOB	putP	1097283	DM0	DM0+4
ZDBp898	intergenic	ycfP/ndh	1181558	DM0	DM0+4
ZDBp898	intergenic	ycgV/ychF	1257394	DM0	DM0+4
ZDBp898	MOB	cls	1306894	DM0	DM0+4
ZDBp898	DEL	[acpD]–[trg]	1457389	DM0	DM0+4
ZDBp898	DEL	[ydhY]–[pykF]	1729737	DM0	DM0+4
ZDBp898	DEL	ydjO	1789698	DM0	DM0+4
ZDBp898	INS	fadD	1867855	DM0	DM0+4
ZDBp898	MOB	yobG/ECB_01797	1887084	DM0	DM0+4
ZDBp898	MOB	zwf	1913929	DM0	DM0+4
ZDBp898	pseudogene	hyfC	2468533	DM0	DM0+4
ZDBp898	nonsense	ECB_02649	2769779	DM0	DM0+4
ZDBp898	DEL	[yqeB]–[ygfK]	2845864	DM0	DM0+4
ZDBp898	MOB	envZ	3393071	DM0	DM0+4
ZDBp898	nonsynonymous	glgC	3429542	DM0	DM0+4
ZDBp898	DEL	insK-4/glyS	3583667	DM0	DM0+4
ZDBp898	MOB	yjcH/acs	4191720	DM0	DM0+4
ZDBp898	MOB	yjcO	4203100	DM0	DM0+4
ZDBp898	DEL	hflK	4307583	DM0	DM0+4
ZDBp898	MOB	mdoB	4478040	DM0	DM0+4
ZDBp898	INS	smp/insJ-2	4502903	DM0	DM0+4
ZDBp892	MOB	priC	464051	DM0	DM0+2
ZDBp892	MOB	cusS	574068	DM0	DM0+2
ZDBp892	DEL	ybeR–gltL	660274	DM0	DM0+2
ZDBp892	nonsynonymous	gltA	735941	DM0	DM0+2
ZDBp892	nonsynonymous	phoQ	1205348	DM0	DM0+2
ZDBp892	DEL	ldrB/insK-2	1271135	DM0	DM0+2
ZDBp892	DEL	[acpD]–insJ-2	1457389	DM0	DM0+2
ZDBp892	MOB	mepA	2331208	DM0	DM0+2
ZDBp892	nonsynonymous	ygaF	2630053	DM0	DM0+2
ZDBp892	intergenic	recA/ygaD	2663500	DM0	DM0+2
ZDBp892	DEL	insJ-3/cysH	2720682	DM0	DM0+2
ZDBp892	MOB	yqjA	3109394	DM0	DM0+2
ZDBp892	MOB	nlpI/pnp	3172540	DM0	DM0+2
ZDBp892	nonsynonymous	glgP	3427815	DM0	DM0+2
ZDBp892	MOB	yhiO/uspA	3501576	DM0	DM0+2
ZDBp892	DEL	[bisC]–hokA	3577388	DM0	DM0+2
ZDBp892	MOB	mdoB	4478040	DM0	DM0+2
ZDBp892	nonsynonymous	lplA	4501612	DM0	DM0+2
ZDBp889	MOB	hupB/ppiD	435255	DM0	DM0+1
ZDBp889	DEL	hokE–[entD]	590047	DM0	DM0+1
ZDBp889	nonsynonymous	gltA	735941	DM0	DM0+1
ZDBp889	DEL	[macB]–[clpA]	939393	DM0	DM0+1
ZDBp889	MOB	yccR	1039280	DM0	DM0+1
ZDBp889	MOB	ymcA	1064767	DM0	DM0+1
ZDBp889	MOB	flgK	1154915	DM0	DM0+1
ZDBp889	MOB	nhaB/fadR	1236016	DM0	DM0+1
ZDBp889	DEL	cls	1306724	DM0	DM0+1
ZDBp889	DEL	cybB–ydcJ	1466345	DM0	DM0+1
ZDBp889	MOB	hokD/ECB_01533	1619073	DM0	DM0+1
ZDBp889	DEL	ydhY	1729741	DM0	DM0+1
ZDBp889	MOB	yobG/ECB_01797	1887041	DM0	DM0+1
ZDBp889	MOB	fadL	2348272	DM0	DM0+1
ZDBp889	nonsynonymous	eutJ	2434162	DM0	DM0+1
ZDBp889	MOB	ECB_02509	2623300	DM0	DM0+1
ZDBp889	nonsynonymous	ygaF	2630053	DM0	DM0+1
ZDBp889	MOB	nupG	2938642	DM0	DM0+1
ZDBp889	MOB	yhiO/uspA	3501577	DM0	DM0+1
ZDBp889	MOB	yhjG	3538891	DM0	DM0+1
ZDBp889	DEL	insK-4/glyS	3583666	DM0	DM0+1
ZDBp889	DEL	cycA	4343098	DM0	DM0+1
ZDBp889	INS	smp/insJ-2	4502903	DM0	DM0+1
ZDBp886	DEL	ECB_00212	243649	DM0	DM0-6
ZDBp886	DEL	[ECB_00530]–[insK-1]	572890	DM0	DM0-6
ZDBp886	nonsynonymous	gltA	736126	DM0	DM0-6
ZDBp886	nonsynonymous	phoQ	1205342	DM0	DM0-6
ZDBp886	MOB	hokD/ECB_01533	1619073	DM0	DM0-6
ZDBp886	MOB	ydgG	1651192	DM0	DM0-6
ZDBp886	MOB	yegX	2079174	DM0	DM0-6
ZDBp886	intergenic	yfcY/yfcZ	2346173	DM0	DM0-6
ZDBp886	MOB	fadL	2348272	DM0	DM0-6
ZDBp886	intergenic	acrD/yffB	2455036	DM0	DM0-6
ZDBp886	MOB	ECB_02812/ECB_02813	2957887	DM0	DM0-6
ZDBp886	MOB	yqjA	3109394	DM0	DM0-6
ZDBp886	MOB	yhiO/uspA	3501576	DM0	DM0-6
ZDBp886	MOB	dgoT/dgoD	3764589	DM0	DM0-6
ZDBp886	nonsynonymous	yjbB	4135292	DM0	DM0-6
ZDBp886	MOB	yjdA	4234238	DM0	DM0-6
ZDBp904	MOB	mltD	237985	DM0	DM0+6
ZDBp904	MOB	ybgD/gltA	734968	DM0	DM0+6
ZDBp904	nonsynonymous	ybiI	831886	DM0	DM0+6
ZDBp904	MOB	pflA/pflB	969347	DM0	DM0+6
ZDBp904	DEL	ECB_01341–[ydbC]	1423903	DM0	DM0+6
ZDBp904	DEL	[acpD]–insJ-2	1457389	DM0	DM0+6
ZDBp904	MOB	ynjI	1821169	DM0	DM0+6
ZDBp904	MOB	yebT	1896278	DM0	DM0+6
ZDBp904	MOB	mglB	2133582	DM0	DM0+6
ZDBp904	MOB	yfaL	2230905	DM0	DM0+6
ZDBp904	intergenic	yfcY/yfcZ	2346183	DM0	DM0+6
ZDBp904	INS	iscR	2525967	DM0	DM0+6
ZDBp904	MOB	yhiO/uspA	3501576	DM0	DM0+6
ZDBp904	INS	cycA	4343095	DM0	DM0+6
ZDBp871	MOB	ispC/uppS	199024	DM0	DM0-1
ZDBp871	DEL	ybcQ	547546	DM0	DM0-1
ZDBp871	DEL	[ybcU]–[insK-1]	549926	DM0	DM0-1
ZDBp871	MOB	entF	599136	DM0	DM0-1
ZDBp871	intergenic	gltA/sdhC	736323	DM0	DM0-1
ZDBp871	MOB	yceJ	1134456	DM0	DM0-1
ZDBp871	MOB	flgK	1154915	DM0	DM0-1
ZDBp871	DEL	ycjC	1362312	DM0	DM0-1
ZDBp871	DEL	[acpD]–insJ-2	1457389	DM0	DM0-1
ZDBp871	MOB	ydgG	1651190	DM0	DM0-1
ZDBp871	INS	insJ-2/pheM	1776123	DM0	DM0-1
ZDBp871	MOB	yebT	1897614	DM0	DM0-1
ZDBp871	nonsynonymous	atoS	2209801	DM0	DM0-1
ZDBp871	MOB	fadL	2348062	DM0	DM0-1
ZDBp871	MOB	hcaC	2535008	DM0	DM0-1
ZDBp871	INS	yfiH	2600587	DM0	DM0-1
ZDBp871	nonsynonymous	emrR	2650572	DM0	DM0-1
ZDBp871	MOB	ygfH	2897655	DM0	DM0-1
ZDBp871	nonsynonymous	argR	3242824	DM0	DM0-1
ZDBp871	MOB	yhgA	3402005	DM0	DM0-1
ZDBp871	MOB	yhiO/uspA	3501576	DM0	DM0-1
ZDBp871	MOB	ldrD/yhjV	3561766	DM0	DM0-1
ZDBp871	MOB	yidP	3756769	DM0	DM0-1
ZDBp871	MOB	fadA	3932217	DM0	DM0-1
ZDBp871	MOB	yihS	3975518	DM0	DM0-1
ZDBp871	DEL	metL	4035958	DM0	DM0-1
ZDBp871	nonsynonymous	rpoB	4091274	DM0	DM0-1
ZDBp871	MOB	lysU	4260611	DM0	DM0-1
ZDBp871	DEL	cycA	4343098	DM0	DM0-1
ZDBp871	MOB	yjiX/yjiY	4456970	DM0	DM0-1
ZDBp895	MOB	fadE	248532	DM0	DM0+3
ZDBp895	nonsynonymous	gltA	735797	DM0	DM0+3
ZDBp895	MOB	ECB_00830	891825	DM0	DM0+3
ZDBp895	nonsynonymous	ompF	1004905	DM0	DM0+3
ZDBp895	intergenic	ycfP/ndh	1181558	DM0	DM0+3
ZDBp895	DEL	[acpD]–insJ-2	1457389	DM0	DM0+3
ZDBp895	MOB	yddG/fdnG	1528089	DM0	DM0+3
ZDBp895	MOB	rpsV/bdm	1536758	DM0	DM0+3
ZDBp895	MOB	eamA	1595625	DM0	DM0+3
ZDBp895	MOB	ydgG	1651206	DM0	DM0+3
ZDBp895	MOB	astE	1802927	DM0	DM0+3
ZDBp895	MOB	fadD	1867822	DM0	DM0+3
ZDBp895	MOB	mglB	2133554	DM0	DM0+3
ZDBp895	intergenic	glyA/hmpA	2549863	DM0	DM0+3
ZDBp895	MOB	yqjC	3110349	DM0	DM0+3
ZDBp895	MOB	yhiO/uspA	3501576	DM0	DM0+3
ZDBp895	MOB	yhjG	3536960	DM0	DM0+3
ZDBp895	MOB	ECB_03690	3888290	DM0	DM0+3
ZDBp895	MOB	ytfT	4364778	DM0	DM0+3
ZDBp895	MOB	yjhS/yjhT	4446620	DM0	DM0+3
