# Supplementary material for: Genomic and phenotypic evolution of Escherichia coli in a novel citrate-only resource environment
Source: eLife. 2020 May 29;9:e55414. doi: 10.7554/eLife.55414 (PMC7299349; doi:10.7554/eLife.55414)
Supplement: Figure 2—source data 2. [file elife-55414-fig2-data2.xlsx]

## Sheet: LTEE
Population	Strain ID	Generation	Total Mutations	Base Substitutions	IS Element Insertions	Small Indels	Large Deletions	Large Duplications	Total Deleted Base Pairs	Total Inserted Base Pairs	Estimated Final Genome Size	Synonymous Base Substitutions	Nonsynonymous Base Substitutions	Nonsense Base Substitutions	Pseudogene Base Substitutions	Noncoding RNA Base Substitutions	Intergenic Base Substitutions
Ara+1	REL768A	500	4	3	0	0	1	0	6244	0	4623568	0	2	0	0	0	1
Ara+1	REL768B	500	3	1	1	0	1	0	4772	1349	4626389	0	1	0	0	0	0
Ara+1	REL958A	1000	4	2	0	1	1	0	2544	0	4627268	0	2	0	0	0	0
Ara+1	REL958B	1000	2	1	1	0	0	0	0	1446	4631258	0	1	0	0	0	0
Ara+1	REL1062A	1500	7	5	0	0	2	0	6305	0	4623507	0	4	0	0	0	1
Ara+1	REL1062B	1500	6	5	0	0	1	0	6244	0	4623568	0	5	0	0	0	0
Ara+1	REL1158A	2000	8	4	3	0	1	0	6138	4339	4628013	0	3	0	0	0	1
Ara+1	REL1158C	2000	9	2	3	1	2	1	7584	67023	4689251	0	2	0	0	0	0
Ara+1	REL2173A	5000	22	4	13	2	2	1	45721	20245	4604336	0	2	0	0	0	2
Ara+1	REL2173B	5000	19	7	10	0	2	0	6527	14460	4637745	0	5	0	0	0	2
Ara+1	REL4530A	10000	35	10	16	3	5	1	61166	84344	4652990	1	7	0	0	0	2
Ara+1	REL4530B	10000	32	8	18	1	4	1	51981	89050	4666881	1	5	0	0	0	2
Ara+1	REL7183A	15000	48	15	19	4	7	3	69417	191760	4752155	1	10	0	0	0	4
Ara+1	REL7183B	15000	47	16	18	4	7	2	69417	241449	4801844	1	9	1	0	0	5
Ara+1	REL9282A	20000	54	16	24	4	8	2	89032	251907	4792687	1	12	0	0	0	3
Ara+1	REL9282B	20000	56	18	21	5	9	3	155540	247568	4721840	2	12	0	1	0	3
Ara+1	REL10450	30000	82	26	34	8	11	3	311564	254311	4572559	4	17	0	1	0	4
Ara+1	REL10451	30000	78	27	28	6	14	3	349453	257018	4537377	3	18	0	2	0	4
Ara+1	REL11008	40000	93	32	36	8	14	3	312822	257201	4574191	5	21	0	1	0	5
Ara+1	REL11009	40000	95	30	37	8	15	5	378661	367480	4618631	6	19	1	1	0	3
Ara+1	REL11392	50000	111	46	37	8	16	4	385233	271177	4515756	7	28	2	1	0	8
Ara+1	REL11393	50000	115	44	42	9	16	4	327995	276985	4578802	8	27	1	1	0	7
Ara+2	REL769A	500	2	2	0	0	0	0	0	0	4629812	0	2	0	0	0	0
Ara+2	REL769B	500	2	2	0	0	0	0	0	0	4629812	0	2	0	0	0	0
Ara+2	REL959A	1000	4	3	1	0	0	0	0	777	4630589	0	3	0	0	0	0
Ara+2	REL959B	1000	4	3	1	0	0	0	0	777	4630589	0	3	0	0	0	0
Ara+2	REL1063A	1500	5	3	1	0	1	0	6414	777	4624175	0	3	0	0	0	0
Ara+2	REL1063B	1500	6	5	1	0	0	0	0	777	4630589	1	3	0	0	0	1
Ara+2	REL1159A	2000	8	6	1	0	1	0	3537	777	4627052	1	4	0	0	0	1
Ara+2	REL1159B	2000	9	5	3	0	1	0	3537	3572	4629847	1	4	0	0	0	0
Ara+2	REL2174A	5000	12	5	4	2	0	1	1	65028	4694839	0	5	0	0	0	0
Ara+2	REL2174B	5000	11	5	3	2	0	1	1	64251	4694062	0	5	0	0	0	0
Ara+2	REL4531A	10000	23	12	3	3	3	2	53853	93311	4669270	0	9	2	0	0	1
Ara+2	REL4531B	10000	25	12	3	4	4	2	114626	93311	4608497	0	9	2	0	0	1
Ara+2	REL7184A	15000	31	15	3	5	5	3	97453	122280	4654639	0	11	2	0	0	2
Ara+2	REL7184B	15000	33	17	3	5	6	2	126399	93320	4596733	1	11	2	0	0	3
Ara+2	REL8601A	20000	37	18	5	6	6	2	119603	95448	4605657	0	12	2	0	0	4
Ara+2	REL8601B	20000	33	16	3	6	6	2	119603	93322	4603531	0	11	2	0	0	3
Ara+2	REL10407	30000	46	23	8	7	6	2	119608	98922	4609126	0	15	2	0	0	6
Ara+2	REL10408	30000	47	22	7	8	7	3	120039	112537	4622310	2	12	2	1	0	5
Ara+2	REL10950	40000	58	32	9	9	6	2	119608	99805	4610009	1	20	3	0	0	8
Ara+2	REL10951	40000	54	28	9	9	6	2	119608	99805	4610009	0	17	3	0	0	8
Ara+2	REL11342	50000	67	37	10	10	8	2	148569	101250	4582493	0	23	3	0	0	11
Ara+2	REL11343	50000	67	38	10	10	7	2	134089	101250	4596973	0	23	3	0	0	12
Ara+3	REL770A	500	2	1	0	1	0	0	0	1	4629813	0	1	0	0	0	0
Ara+3	REL770B	500	3	1	1	1	0	0	1	1446	4631257	0	1	0	0	0	0
Ara+3	REL960A	1000	4	2	0	1	1	0	5700	0	4624112	0	2	0	0	0	0
Ara+3	REL960B	1000	4	2	0	1	1	0	4570	0	4625242	0	2	0	0	0	0
Ara+3	REL1064A	1500	6	3	1	1	1	0	5700	1439	4625551	0	3	0	0	0	0
Ara+3	REL1064B	1500	6	4	1	1	0	0	9	1446	4631249	0	3	0	0	0	1
Ara+3	REL1160A	2000	8	4	2	1	1	0	5700	2886	4626998	0	4	0	0	0	0
Ara+3	REL1160B	2000	9	4	2	1	2	0	18528	2892	4614176	0	4	0	0	0	0
Ara+3	REL2175A	5000	147	107	1	37	2	0	6423	1470	4624859	25	67	1	3	0	11
Ara+3	REL2175B	5000	152	116	1	34	1	0	6187	1470	4625095	28	74	2	1	0	11
Ara+3	REL4532A	10000	331	279	2	46	4	0	60106	2925	4572631	77	167	4	3	0	28
Ara+3	REL4532B	10000	375	310	3	58	4	0	38446	4380	4595746	89	185	3	5	0	28
Ara+3	REL7185A	15000	653	530	1	119	3	0	29990	1542	4601364	155	295	11	10	0	59
Ara+3	REL7185B	15000	644	524	2	115	2	1	29507	3238	4603543	153	291	10	10	0	60
Ara+3	REL8602A	20000	873	730	1	140	2	0	29517	1551	4601846	220	408	16	11	0	75
Ara+3	REL8602B	20000	871	727	1	141	2	0	29523	1545	4601834	215	411	16	12	0	73
Ara+3	REL10410	30000	1128	942	3	179	4	0	70558	4277	4563531	293	522	16	15	0	96
Ara+3	REL10411	30000	1143	962	3	174	4	0	82409	4281	4551684	290	539	17	15	0	101
Ara+3	REL10953	40000	1532	1262	4	261	5	0	92750	5757	4542819	390	706	22	17	0	127
Ara+3	REL10954	40000	1537	1270	4	259	4	0	70598	5758	4564972	390	709	24	19	0	128
Ara+3	REL11345	50000	1729	1448	4	271	6	0	100311	5766	4535267	451	810	24	20	0	143
Ara+3	REL11346	50000	1640	1361	5	269	5	0	92764	5873	4542921	408	763	26	20	0	144
Ara+4	REL771A	500	2	1	0	0	0	1	0	132528	4762340	0	1	0	0	0	0
Ara+4	REL771B	500	3	2	0	1	0	0	1	0	4629811	0	2	0	0	0	0
Ara+4	REL961A	1000	2	1	0	1	0	0	1	0	4629811	0	1	0	0	0	0
Ara+4	REL961B	1000	4	2	0	1	1	0	3948	0	4625864	0	1	0	0	0	1
Ara+4	REL1065A	1500	7	5	0	1	1	0	3948	0	4625864	2	3	0	0	0	0
Ara+4	REL1065B	1500	9	8	0	1	0	0	1	0	4629811	1	4	0	1	0	2
Ara+4	REL1161A	2000	6	4	0	1	1	0	3948	0	4625864	1	3	0	0	0	0
Ara+4	REL1161B	2000	6	3	1	1	1	0	6109	1458	4625161	1	1	1	0	0	0
Ara+4	REL2176A	5000	11	7	1	2	1	0	3950	776	4626638	0	5	0	0	0	2
Ara+4	REL2176B	5000	8	6	0	1	1	0	3948	0	4625864	0	5	0	0	0	1
Ara+4	REL4533A	10000	21	12	1	5	2	1	16039	13301	4627074	0	11	0	0	0	1
Ara+4	REL4533B	10000	21	12	1	5	2	1	16039	13301	4627074	0	11	0	0	0	1
Ara+4	REL7186A	15000	27	14	2	6	4	1	39546	14747	4605013	0	12	0	0	0	2
Ara+4	REL7186B	15000	27	15	2	6	3	1	16253	14747	4628306	0	12	0	0	0	3
Ara+4	REL8603A	20000	40	21	5	6	7	1	89728	17748	4557832	1	16	0	0	0	4
Ara+4	REL8603B	20000	36	21	2	6	6	1	73499	14747	4571060	1	16	0	0	0	4
Ara+4	REL10414	30000	44	24	3	7	7	3	81054	31584	4580342	1	17	0	0	0	6
Ara+4	REL10415	30000	42	25	3	7	6	1	73500	16193	4572505	2	16	0	0	0	7
Ara+4	REL10956	40000	54	32	6	8	7	1	87027	19847	4562632	3	19	1	0	0	9
Ara+4	REL10957	40000	54	31	7	8	7	1	87027	19963	4562748	2	20	1	0	0	8
Ara+4	REL11348	50000	68	41	6	11	9	1	108491	19763	4541084	2	23	1	0	0	15
Ara+4	REL11349	50000	67	41	6	10	8	2	87597	209849	4752064	2	23	1	0	0	15
Ara+5	REL772A	500	2	1	1	0	0	0	0	1446	4631258	0	1	0	0	0	0
Ara+5	REL772B	500	2	2	0	0	0	0	0	0	4629812	0	2	0	0	0	0
Ara+5	REL962A	1000	5	3	0	1	1	0	613	1	4629200	0	2	0	0	0	1
Ara+5	REL962B	1000	3	2	0	0	1	0	1799	0	4628013	0	2	0	0	0	0
Ara+5	REL1066A	1500	5	3	1	0	1	0	5111	777	4625478	0	3	0	0	0	0
Ara+5	REL1066B	1500	4	3	1	0	0	0	0	1447	4631259	0	2	0	0	0	1
Ara+5	REL1162A	2000	7	4	1	1	1	0	5111	778	4625479	0	4	0	0	0	0
Ara+5	REL1162B	2000	6	4	1	0	1	0	5111	777	4625478	0	4	0	0	0	0
Ara+5	REL2177A	5000	15	9	4	0	2	0	410	5785	4635187	0	9	0	0	0	0
Ara+5	REL2177B	5000	11	8	2	0	1	0	283	2893	4632422	0	8	0	0	0	0
Ara+5	REL4534A	10000	20	15	2	0	2	1	10903	63662	4682571	0	12	0	0	0	3
Ara+5	REL4534B	10000	17	12	2	0	2	1	10903	63662	4682571	0	10	0	0	0	2
Ara+5	REL7187A	15000	30	18	7	1	2	2	56059	124131	4697884	2	15	0	0	0	1
Ara+5	REL7187B	15000	31	18	7	1	3	2	63609	124131	4690334	3	14	0	0	0	1
Ara+5	REL8604A	20000	33	20	5	2	5	1	34141	67905	4663576	3	14	0	0	0	3
Ara+5	REL8604B	20000	32	20	5	1	5	1	34140	67905	4663577	3	14	0	0	0	3
Ara+5	REL10432	30000	50	27	10	4	5	4	152045	199286	4677053	2	22	1	0	0	2
Ara+5	REL10433	30000	51	28	10	4	5	4	152045	199286	4677053	2	23	1	0	0	2
Ara+5	REL10982	40000	64	36	14	6	5	3	152047	162488	4640253	4	27	2	0	0	3
Ara+5	REL10983	40000	66	36	15	6	6	3	181909	163935	4611838	4	26	2	0	0	4
Ara+5	REL11367	50000	77	45	16	8	5	3	152049	165381	4643144	5	32	2	0	0	6
Ara+5	REL11368	50000	76	42	16	9	6	3	181910	165383	4613285	4	30	2	0	0	6
Ara+6	REL773A	500	2	2	0	0	0	0	0	0	4629812	0	2	0	0	0	0
Ara+6	REL773B	500	2	1	0	0	1	0	1225	0	4628587	0	1	0	0	0	0
Ara+6	REL963A	1000	4	3	0	0	1	0	3182	0	4626630	0	3	0	0	0	0
Ara+6	REL963B	1000	3	3	0	0	0	0	0	0	4629812	0	3	0	0	0	0
Ara+6	REL1067A	1500	4	4	0	0	0	0	0	0	4629812	0	4	0	0	0	0
Ara+6	REL1067B	1500	6	4	0	0	2	0	6682	0	4623130	0	3	0	0	0	1
Ara+6	REL1163A	2000	5	4	0	0	1	0	6417	0	4623395	0	3	0	0	0	1
Ara+6	REL1163B	2000	5	4	0	0	1	0	6417	0	4623395	0	3	0	0	0	1
Ara+6	REL2178A	5000	8	6	0	1	1	0	5160	3	4624655	0	4	0	0	0	2
Ara+6	REL2178B	5000	9	6	0	1	2	0	8270	3	4621545	0	4	0	0	0	2
Ara+6	REL4535A	10000	598	593	1	3	1	0	5162	1449	4626099	62	445	9	7	0	70
Ara+6	REL4535B	10000	679	674	2	2	1	0	5161	2798	4627449	79	499	9	6	0	81
Ara+6	REL7188A	15000	994	987	3	2	2	0	13780	3575	4619607	114	706	19	12	0	136
Ara+6	REL7188B	15000	1001	994	3	2	2	0	13780	3575	4619607	119	706	21	12	0	136
Ara+6	REL8605A	20000	1235	1228	3	2	2	0	13780	4244	4620276	140	890	23	16	0	159
Ara+6	REL8605B	20000	1358	1351	2	3	2	0	13781	2798	4618829	163	968	26	17	0	177
Ara+6	REL10417	30000	1837	1827	4	2	4	0	43480	4352	4590684	214	1316	32	23	1	241
Ara+6	REL10418	30000	1883	1874	2	2	5	0	67635	2798	4564975	211	1360	30	22	1	250
Ara+6	REL10985	40000	2185	2172	3	2	8	0	76300	3576	4557088	268	1561	35	25	1	282
Ara+6	REL10986	40000	2021	2009	4	4	4	0	43481	5693	4592024	227	1443	38	29	1	271
Ara+6	REL11370	50000	2557	2548	2	2	5	0	73042	2799	4559569	292	1818	42	39	1	356
Ara+6	REL11371	50000	2293	2276	6	3	8	0	62344	5902	4573370	287	1629	38	28	1	293
Ara-1	REL762B	500	3	2	0	0	1	0	3060	0	4626752	0	2	0	0	0	0
Ara-1	REL762C	500	5	3	0	1	1	0	1139	0	4628673	0	3	0	0	0	0
Ara-1	REL964B	1000	4	2	0	1	1	0	6934	1	4622879	0	2	0	0	0	0
Ara-1	REL964C	1000	6	4	1	0	1	0	3060	777	4627529	0	4	0	0	0	0
Ara-1	REL1068B	1500	5	2	1	1	1	0	6934	1447	4624325	0	2	0	0	0	0
Ara-1	REL1068C	1500	7	4	0	2	1	0	6934	8	4622886	0	4	0	0	0	0
Ara-1	REL1164A	2000	6	3	1	1	1	0	6934	1350	4624228	0	3	0	0	0	0
Ara-1	REL1164B	2000	6	3	0	2	1	0	6934	8	4622886	0	3	0	0	0	0
Ara-1	REL2179A	5000	14	9	2	2	1	0	6934	2797	4625675	0	9	0	0	0	0
Ara-1	REL2179B	5000	14	8	2	3	1	0	6967	2797	4625642	0	8	0	0	0	0
Ara-1	REL4536A	10000	26	16	3	4	3	0	38468	4341	4595685	1	12	0	0	0	3
Ara-1	REL4536B	10000	26	18	1	4	3	0	38468	1450	4592794	1	12	0	0	0	5
Ara-1	REL7177A	15000	36	22	7	4	3	0	38468	10029	4601373	0	18	0	0	0	4
Ara-1	REL7177B	15000	36	22	5	5	4	0	64908	7165	4572069	0	18	0	0	0	4
Ara-1	REL8593A	20000	42	27	7	5	3	0	38469	10030	4601373	0	21	0	0	0	6
Ara-1	REL8593B	20000	40	26	7	4	3	0	38468	10030	4601374	0	21	0	0	0	5
Ara-1	REL10391	30000	415	394	8	8	4	1	38531	11616	4602897	46	292	4	5	0	47
Ara-1	REL10392	30000	510	487	9	9	4	1	38531	12973	4604254	57	354	9	3	0	64
Ara-1	REL10938	40000	642	616	10	8	7	1	68926	13743	4574629	82	430	10	6	0	88
Ara-1	REL10939	40000	850	823	11	10	5	1	46086	14617	4598343	112	574	11	10	0	116
Ara-1	REL11330	50000	1087	1059	11	10	6	1	47171	14617	4597258	153	744	16	12	0	134
Ara-1	REL11331	50000	1105	1076	11	11	6	1	47171	14621	4597262	162	753	18	11	0	132
Ara-2	REL763A	500	2	1	0	1	0	0	0	11	4629823	0	1	0	0	0	0
Ara-2	REL763B	500	2	1	0	0	1	0	7428	0	4622384	0	1	0	0	0	0
Ara-2	REL965A	1000	4	4	0	0	0	0	0	0	4629812	1	3	0	0	0	0
Ara-2	REL965B	1000	3	3	0	0	0	0	0	0	4629812	0	3	0	0	0	0
Ara-2	REL1069A	1500	4	3	0	0	1	0	5681	0	4624131	0	3	0	0	0	0
Ara-2	REL1069B	1500	4	3	1	0	0	0	0	777	4630589	0	3	0	0	0	0
Ara-2	REL1165A	2000	6	4	1	0	1	0	614	1349	4630547	0	4	0	0	0	0
Ara-2	REL11829	2000	5	4	0	0	1	0	3769	0	4626043	0	3	0	0	0	1
Ara-2	REL2180A	5000	136	105	0	28	3	0	35760	23	4594075	37	59	1	1	0	7
Ara-2	REL2180B	5000	127	107	0	19	1	0	4910	11	4624919	34	65	0	2	0	6
Ara-2	REL4537A	10000	300	241	0	56	3	0	35767	44	4594089	87	125	3	5	0	21
Ara-2	REL4537B	10000	316	252	1	60	3	0	35765	830	4594877	95	129	2	3	0	23
Ara-2	REL7178A	15000	579	497	3	74	4	1	45024	4882	4589670	153	291	4	6	0	43
Ara-2	REL7178B	15000	501	407	0	90	3	1	35779	204	4594237	140	220	6	6	0	35
Ara-2	REL11830	20000	643	524	7	104	8	0	129360	8588	4509040	164	300	6	6	0	48
Ara-2	REL11831	20000	651	527	1	119	3	1	35798	989	4595003	161	297	9	9	0	51
Ara-2	REL11832	30000	832	711	6	111	4	0	44568	7147	4592391	232	407	4	7	0	61
Ara-2	REL11833	30000	634	514	0	115	4	1	57933	222	4572101	163	284	9	8	0	50
Ara-2	REL11035	40000	1036	847	3	179	6	1	91010	2589	4541391	271	460	19	12	0	85
Ara-2	REL11036	40000	1077	910	18	139	10	0	123299	24222	4530735	292	520	6	9	0	83
Ara-2	REL11333	50000	1026	831	6	181	7	1	110454	5586	4524944	262	456	19	12	0	82
Ara-2	REL11335	50000	1088	912	22	142	11	1	158130	30144	4501826	292	520	7	9	0	84
Ara-3	REL764A	500	1	1	0	0	0	0	0	0	4629812	0	0	0	0	0	1
Ara-3	REL764B	500	3	2	0	0	1	0	5987	0	4623825	0	2	0	0	0	0
Ara-3	REL966A	1000	5	2	2	0	1	0	6406	2893	4626299	0	0	1	0	0	1
Ara-3	REL966B	1000	4	2	0	1	1	0	537	0	4629275	0	2	0	0	0	0
Ara-3	REL1070A	1500	7	4	2	0	1	0	6406	2892	4626298	0	2	1	0	0	1
Ara-3	REL1070B	1500	5	2	1	1	1	0	537	1447	4630722	0	2	0	0	0	0
Ara-3	REL1166A	2000	9	3	3	1	2	0	6100	4241	4627953	0	3	0	0	0	0
Ara-3	REL1166B	2000	10	4	4	0	1	1	6406	7762	4631168	0	2	1	0	0	1
Ara-3	REL2181A	5000	15	6	5	1	3	0	7205	6563	4629170	0	6	0	0	0	0
Ara-3	ZDB409	5000	17	7	7	1	2	0	6997	9454	4632269	0	6	0	0	0	1
Ara-3	REL4538A	10000	24	11	9	1	3	0	7145	12348	4635015	0	8	0	0	0	3
Ara-3	ZDB429	10000	27	11	11	2	3	0	7146	15145	4637811	0	8	0	0	0	3
Ara-3	ZDB446	15000	35	15	15	1	4	0	18167	20830	4632475	1	10	0	0	0	4
Ara-3	REL7179B	15000	33	16	11	3	3	0	7176	15244	4637880	0	12	0	0	0	4
Ara-3	ZDB458	20000	43	18	15	3	6	1	40675	81506	4670643	1	13	0	0	0	4
Ara-3	ZDB464	20000	45	18	16	3	8	0	64725	22202	4587289	1	13	0	0	0	4
Ara-3	ZDB16	30000	50	25	12	5	8	0	76697	16397	4569512	2	17	0	0	0	6
Ara-3	ZDB357	30000	64	32	20	4	8	0	58650	27203	4598365	4	21	0	0	0	7
Ara-3	REL10979	40000	379	281	29	54	13	2	98434	56710	4585674	86	150	8	2	0	35
Ara-3	REL10988	40000	104	41	41	5	17	0	199546	155408	4588088	6	26	1	0	0	8
Ara-3	REL11364	50000	765	621	31	92	18	3	330046	160492	4460258	178	353	8	11	0	71
Ara-3	REL11365	50000	780	631	31	95	19	4	333497	333560	4629875	194	347	9	9	0	72
Ara-4	REL765A	500	2	2	0	0	0	0	0	0	4629812	0	2	0	0	0	0
Ara-4	REL765B	500	2	2	0	0	0	0	0	0	4629812	0	2	0	0	0	0
Ara-4	REL967A	1000	3	2	0	0	1	0	5122	0	4624690	0	2	0	0	0	0
Ara-4	REL967B	1000	3	3	0	0	0	0	0	0	4629812	0	3	0	0	0	0
Ara-4	REL1071A	1500	7	5	0	1	1	0	6408	1	4623405	0	5	0	0	0	0
Ara-4	REL1071B	1500	8	5	0	2	1	0	6408	2	4623406	0	5	0	0	0	0
Ara-4	REL1167A	2000	9	7	0	1	1	0	6408	1	4623405	0	7	0	0	0	0
Ara-4	REL1167B	2000	7	5	0	1	1	0	6408	1	4623405	0	5	0	0	0	0
Ara-4	REL2182A	5000	14	11	0	2	1	0	6409	1	4623404	1	7	1	0	0	2
Ara-4	REL2182B	5000	12	7	1	2	2	0	17306	802	4613308	0	6	0	0	0	1
Ara-4	REL4539A	10000	244	204	1	38	1	0	6431	804	4624185	68	110	5	2	0	19
Ara-4	REL4539B	10000	265	226	1	36	2	0	29721	805	4600896	79	117	6	2	1	21
Ara-4	REL7180A	15000	439	378	1	57	3	0	72347	827	4558292	129	197	9	3	0	40
Ara-4	REL7180B	15000	461	392	1	64	4	0	79906	827	4550733	126	211	9	3	0	43
Ara-4	REL8596A	20000	634	523	1	107	3	0	72371	858	4558299	182	271	14	4	0	52
Ara-4	REL8596B	20000	602	507	1	91	3	0	72362	851	4558301	170	269	12	3	0	53
Ara-4	REL10401	30000	921	749	1	164	6	1	109720	1196	4521288	252	395	19	10	0	73
Ara-4	REL10402	30000	900	731	1	161	7	0	148022	904	4482694	237	397	17	8	0	72
Ara-4	REL10944	40000	1126	892	2	223	8	1	165412	1934	4466334	299	474	19	10	0	90
Ara-4	REL10945	40000	1106	887	1	211	7	0	148048	934	4482698	303	471	18	13	0	82
Ara-4	REL11336	50000	1313	1046	2	256	9	0	180817	2297	4451292	350	563	24	14	0	95
Ara-4	REL11337	50000	1311	1036	3	263	9	0	180814	3098	4452096	347	554	22	15	0	98
Ara-5	REL766A	500	3	2	0	0	1	0	5627	0	4624185	0	2	0	0	0	0
Ara-5	REL766B	500	3	2	0	0	1	0	5627	0	4624185	0	2	0	0	0	0
Ara-5	REL968A	1000	5	4	0	0	1	0	5627	0	4624185	0	4	0	0	0	0
Ara-5	REL968B	1000	4	3	0	0	1	0	5627	0	4624185	0	3	0	0	0	0
Ara-5	REL1072A	1500	5	4	0	0	1	0	5627	0	4624185	0	4	0	0	0	0
Ara-5	REL1072B	1500	7	5	1	0	1	0	5627	1446	4625631	0	5	0	0	0	0
Ara-5	REL1168A	2000	9	6	1	0	1	1	5627	77008	4701193	0	6	0	0	0	0
Ara-5	REL1168B	2000	9	7	1	0	1	0	5627	1349	4625534	1	6	0	0	0	0
Ara-5	REL2183A	5000	15	8	4	0	2	1	27773	19540	4621579	0	7	0	0	0	1
Ara-5	REL2183B	5000	14	9	3	0	1	1	5627	30844	4655029	0	8	0	0	0	1
Ara-5	REL4540A	10000	28	15	9	1	2	1	27782	38851	4640881	3	11	0	0	0	1
Ara-5	REL4540B	10000	35	20	11	1	2	1	27773	53245	4655284	2	13	1	0	0	4
Ara-5	REL7181A	15000	36	22	9	2	2	1	32240	39231	4636803	1	16	0	0	0	5
Ara-5	REL7181B	15000	34	19	9	2	3	1	51076	39231	4617967	1	15	0	0	0	3
Ara-5	REL8597A	20000	41	22	13	2	3	1	37136	45017	4637693	2	17	0	0	0	3
Ara-5	REL8597B	20000	41	22	13	2	3	1	37137	45016	4637691	2	17	0	0	0	3
Ara-5	REL10404	30000	75	17	35	7	16	0	105970	48884	4572726	3	10	0	1	0	3
Ara-5	REL10405	30000	63	40	13	3	5	2	66838	71632	4634606	2	29	2	0	0	7
Ara-5	REL10947	40000	71	43	16	4	7	1	93515	48029	4584326	3	31	2	0	0	7
Ara-5	REL10948	40000	74	44	18	4	7	1	69581	50921	4611152	4	31	2	0	0	7
Ara-5	REL11339	50000	86	50	23	5	7	1	93524	56717	4593005	3	36	2	0	0	9
Ara-5	REL11340	50000	90	52	24	6	7	1	93526	58155	4594441	4	37	2	0	0	9
Ara-6	REL767A	500	3	1	1	0	1	0	7813	1446	4623445	0	1	0	0	0	0
Ara-6	REL767B	500	1	1	0	0	0	0	0	0	4629812	0	0	0	0	0	1
Ara-6	REL969A	1000	4	3	0	0	1	0	6712	0	4623100	0	3	0	0	0	0
Ara-6	REL969B	1000	4	3	0	0	1	0	6712	1	4623101	0	3	0	0	0	0
Ara-6	REL1073A	1500	6	5	0	0	1	0	6712	0	4623100	0	5	0	0	0	0
Ara-6	REL1073B	1500	5	4	0	0	1	0	6712	0	4623100	0	4	0	0	0	0
Ara-6	REL1169A	2000	8	7	0	0	1	0	6712	0	4623100	0	6	0	0	0	1
Ara-6	REL1169B	2000	9	8	0	0	1	0	6712	0	4623100	2	6	0	0	0	0
Ara-6	REL2184A	5000	11	8	0	1	2	0	6822	25	4623015	1	5	1	0	0	1
Ara-6	REL2184B	5000	16	12	1	1	2	0	28858	802	4601756	2	7	1	0	0	2
Ara-6	REL4541A	10000	21	12	6	2	1	0	6721	8500	4631591	1	10	0	0	0	1
Ara-6	REL4541B	10000	26	14	6	4	2	0	17086	7928	4620654	1	12	0	0	0	1
Ara-6	REL7182A	15000	33	18	6	5	4	0	24996	7933	4612749	1	14	0	0	0	3
Ara-6	REL7182B	15000	35	20	7	5	3	0	24935	8613	4613490	1	16	0	0	0	3
Ara-6	REL8598A	20000	42	19	9	6	7	1	55715	10947	4585044	2	15	0	0	0	2
Ara-6	REL8598B	20000	43	20	9	7	5	2	37162	71175	4663825	1	17	0	0	0	2
Ara-6	REL10447	30000	58	29	13	7	8	1	89850	36995	4576957	2	24	0	0	0	3
Ara-6	REL10448	30000	57	29	12	7	8	1	89850	35549	4575511	3	23	0	0	0	3
Ara-6	REL11005	40000	76	32	23	8	12	1	105241	51460	4576031	2	25	0	0	0	5
Ara-6	REL11006	40000	66	34	14	10	7	1	52714	16661	4593759	4	26	0	0	0	4
Ara-6	REL11389	50000	86	40	25	8	12	1	105242	54168	4578738	3	30	0	0	0	7
Ara-6	REL11390	50000	75	39	17	11	7	1	52714	20904	4598002	4	30	0	0	0	5

## Sheet: MAE
Population	Strain ID	Generation	Total Mutations	Base Substitutions	IS Element Insertions	Small Indels	Large Deletions	Large Duplications	Total Deleted Base Pairs	Total Inserted Base Pairs	Estimated Final Genome Size	Synonymous Base Substitutions	Nonsynonymous Base Substitutions	Nonsense Base Substitutions	Pseudogene Base Substitutions	Noncoding RNA Base Substitutions	Intergenic Base Substitutions
MAE-1	JEB807	13750	20	13	4	0	2	1	95014	5690	4540488	1	11	0	0	0	1
MAE-2	JEB808	13750	19	11	1	5	2	0	4336	796	4626272	3	5	0	0	0	3
MAE-3	JEB809	13750	20	17	1	1	1	0	16230	776	4614358	4	8	1	1	0	3
MAE-4	JEB810	13750	25	17	4	3	1	0	1218	4251	4632845	4	10	0	0	0	3
MAE-5	JEB811	13750	22	17	1	1	3	0	25075	1446	4606183	3	10	0	0	0	4
MAE-6	JEB812	13750	17	12	2	1	2	0	7677	2224	4624359	5	5	0	0	0	2
MAE-7	JEB813	13750	23	15	3	3	2	0	26360	3573	4607025	2	9	0	1	0	3
MAE-8	JEB814	13750	16	11	3	2	0	0	6	4242	4634048	3	7	0	0	0	1
MAE-9	JEB815	13750	20	14	3	2	1	0	64	4048	4633796	1	10	0	0	0	3
MAE-10	JEB816	13750	19	10	2	6	1	0	23587	2610	4608835	4	4	0	0	0	2
MAE-11	JEB817	13750	25	10	5	6	4	0	32164	7229	4604877	1	6	0	0	0	3
MAE-12	JEB818	13750	20	12	3	3	2	0	96099	3575	4537288	2	6	2	0	0	2
MAE-13	JEB819	13750	17	8	3	3	2	1	7641	3914	4626085	1	5	0	0	0	2
MAE-14	JEB820	13750	24	17	3	3	1	0	7556	2348	4624604	3	12	0	0	0	2
MAE-15	JEB821	13750	20	13	3	2	2	0	24336	2998	4608474	2	6	0	0	0	5
