# Supplementary material for: Genomic and phenotypic evolution of Escherichia coli in a novel citrate-only resource environment
Source: eLife. 2020 May 29;9:e55414. doi: 10.7554/eLife.55414 (PMC7299349; doi:10.7554/eLife.55414)
Supplement: Figure 5—figure supplement 1—source data 1. [file elife-55414-fig5-figsupp1-data1.csv]

Time	DM25.1	DM25.2	DM25.3	DM25.4	DM25.5	DM25.6	REL606.1	REL606.2	REL606.3	REL606.4	REL606.5
0:00:00	0.0949	0.0966	0.0953	0.0951	0.0948	0.096	0.0976	0.0984	0.0953	0.0966	0.0961
0:10:00	0.095	0.0968	0.0966	0.095	0.0948	0.096	0.0977	0.099	0.0964	0.0967	0.096
0:20:00	0.0952	0.0967	0.0962	0.095	0.0946	0.0962	0.0975	0.099	0.0959	0.0965	0.096
0:30:00	0.0954	0.0969	0.0965	0.0952	0.0947	0.096	0.0976	0.0995	0.0961	0.0967	0.0959
0:40:00	0.0953	0.0968	0.0963	0.095	0.0947	0.0963	0.0978	0.0992	0.0958	0.0966	0.0962
0:50:00	0.0955	0.0968	0.0966	0.0954	0.0948	0.0959	0.0979	0.0997	0.0966	0.0969	0.0962
1:00:00	0.0951	0.0968	0.0964	0.0957	0.0946	0.0964	0.0978	0.0995	0.0962	0.0968	0.0962
1:10:00	0.0953	0.0972	0.0968	0.0953	0.0949	0.0962	0.0981	0.0998	0.0969	0.097	0.0965
1:20:00	0.0952	0.0972	0.0965	0.0959	0.0947	0.0965	0.0982	0.0999	0.0963	0.0971	0.0965
1:30:00	0.0952	0.0972	0.0967	0.0957	0.0948	0.0964	0.0981	0.1001	0.0971	0.0971	0.0966
1:40:00	0.0955	0.0972	0.0973	0.0945	0.0949	0.0964	0.0981	0.1007	0.0981	0.0969	0.0964
1:50:00	0.0953	0.0974	0.0967	0.0958	0.0949	0.0963	0.0983	0.1003	0.0974	0.0973	0.0969
2:00:00	0.0958	0.0974	0.0975	0.0944	0.095	0.0965	0.0988	0.1008	0.0987	0.0971	0.0966
2:10:00	0.0955	0.0972	0.0969	0.0958	0.095	0.0964	0.0988	0.1007	0.0979	0.0976	0.0971
2:20:00	0.0959	0.0975	0.0974	0.0945	0.095	0.0966	0.0989	0.1011	0.0992	0.0974	0.0969
2:30:00	0.0959	0.0976	0.0972	0.0952	0.0951	0.0965	0.0989	0.1011	0.0985	0.0979	0.0974
2:40:00	0.0956	0.0976	0.0972	0.0952	0.095	0.0965	0.099	0.1015	0.0993	0.0976	0.0973
2:50:00	0.0956	0.0976	0.0966	0.096	0.095	0.0963	0.0992	0.1013	0.0989	0.0983	0.0978
3:00:00	0.0959	0.0976	0.0979	0.0944	0.0948	0.0964	0.0992	0.102	0.1001	0.0981	0.0977
3:10:00	0.0958	0.0977	0.0971	0.0959	0.0951	0.0966	0.0996	0.1018	0.0994	0.0985	0.0983
3:20:00	0.096	0.0974	0.0976	0.0944	0.095	0.0964	0.0998	0.1023	0.1006	0.0986	0.0981
3:30:00	0.0959	0.0974	0.0975	0.0956	0.0954	0.0966	0.1003	0.1025	0.1002	0.0992	0.0988
3:40:00	0.0962	0.0977	0.0977	0.0947	0.095	0.0965	0.1003	0.103	0.1015	0.0991	0.0986
3:50:00	0.0959	0.0976	0.0974	0.0958	0.0953	0.0964	0.1009	0.1032	0.1011	0.0998	0.0992
4:00:00	0.0961	0.0976	0.0975	0.0946	0.0951	0.0967	0.101	0.1036	0.1017	0.0999	0.0992
4:10:00	0.0961	0.0977	0.0974	0.0951	0.0954	0.0965	0.1014	0.1038	0.1024	0.1008	0.1
4:20:00	0.0959	0.0978	0.0978	0.095	0.0953	0.0965	0.1023	0.1049	0.1032	0.101	0.1001
4:30:00	0.096	0.0978	0.0973	0.0959	0.0953	0.0966	0.1025	0.1052	0.1036	0.1016	0.101
4:40:00	0.0961	0.0979	0.0977	0.0949	0.0953	0.0967	0.1031	0.1057	0.1047	0.1021	0.1013
4:50:00	0.0961	0.0979	0.0972	0.0958	0.0954	0.0966	0.1037	0.1066	0.1049	0.1032	0.1024
5:00:00	0.096	0.098	0.0977	0.0953	0.0953	0.0966	0.1047	0.1075	0.1065	0.1037	0.1028
5:10:00	0.096	0.0979	0.0974	0.0958	0.0954	0.0966	0.1058	0.1085	0.1067	0.105	0.1039
5:20:00	0.096	0.098	0.0979	0.0952	0.0954	0.0968	0.1065	0.1098	0.1081	0.1057	0.1044
5:30:00	0.0961	0.098	0.0974	0.0962	0.0953	0.0967	0.1078	0.1105	0.1091	0.1072	0.1061
5:40:00	0.0959	0.098	0.0983	0.0951	0.0954	0.097	0.1089	0.1123	0.1112	0.1083	0.1069
5:50:00	0.0965	0.0981	0.0982	0.096	0.0954	0.0971	0.1105	0.1139	0.1115	0.1099	0.1086
6:00:00	0.0961	0.0982	0.0979	0.0958	0.0953	0.0967	0.1122	0.1154	0.114	0.1119	0.1101
6:10:00	0.0964	0.0982	0.0975	0.0963	0.0955	0.0969	0.1141	0.1172	0.1154	0.1143	0.1124
6:20:00	0.0961	0.0981	0.0979	0.0959	0.0953	0.0969	0.1164	0.1197	0.1178	0.1163	0.1139
6:30:00	0.0962	0.0982	0.0974	0.096	0.0956	0.0969	0.1185	0.1222	0.1201	0.1193	0.1166
6:40:00	0.0962	0.0982	0.0977	0.0956	0.0954	0.0969	0.1209	0.1247	0.1242	0.1214	0.1187
6:50:00	0.0965	0.098	0.098	0.0957	0.0955	0.0973	0.1238	0.127	0.1241	0.1231	0.1214
7:00:00	0.0962	0.0982	0.098	0.0958	0.0954	0.0969	0.1248	0.1286	0.1255	0.1239	0.1215
7:10:00	0.0963	0.098	0.0974	0.0965	0.0954	0.0969	0.1245	0.1282	0.1249	0.124	0.1221
7:20:00	0.0964	0.0982	0.0979	0.0961	0.0956	0.097	0.1244	0.1282	0.125	0.1235	0.1214
7:30:00	0.0964	0.0983	0.0975	0.0962	0.0955	0.097	0.1243	0.1281	0.1251	0.1241	0.1215
7:40:00	0.0963	0.0983	0.098	0.0957	0.0956	0.0971	0.1244	0.1282	0.1261	0.1234	0.1211
7:50:00	0.0966	0.0981	0.0981	0.0961	0.0955	0.0971	0.1242	0.1283	0.1256	0.123	0.1216
8:00:00	0.0964	0.0984	0.0981	0.0958	0.0955	0.097	0.1243	0.1283	0.125	0.1235	0.1213
8:10:00	0.0963	0.0983	0.0977	0.0964	0.0955	0.0969	0.1242	0.1283	0.125	0.1238	0.1217
8:20:00	0.0963	0.0985	0.0979	0.0959	0.0955	0.097	0.1243	0.1286	0.1255	0.1234	0.1215
8:30:00	0.0967	0.0984	0.0984	0.0965	0.0956	0.0973	0.1243	0.129	0.1251	0.1233	0.1219
8:40:00	0.0964	0.0985	0.0988	0.0957	0.0957	0.0972	0.1246	0.1289	0.1257	0.1234	0.1217
8:50:00	0.0965	0.0984	0.0977	0.0962	0.0956	0.097	0.1246	0.1286	0.1253	0.1243	0.1222
9:00:00	0.0965	0.0985	0.0982	0.0957	0.0957	0.097	0.1247	0.1293	0.1259	0.1236	0.122
9:10:00	0.0966	0.0987	0.0976	0.0965	0.0956	0.0968	0.1247	0.1291	0.1259	0.1244	0.1222
9:20:00	0.0964	0.0988	0.0981	0.0953	0.0955	0.0969	0.1251	0.1294	0.1263	0.1242	0.122
9:30:00	0.0966	0.0986	0.0982	0.0961	0.0957	0.0973	0.1253	0.1297	0.1264	0.1239	0.1226
9:40:00	0.0964	0.0987	0.0984	0.0958	0.0956	0.0969	0.1252	0.1297	0.126	0.1239	0.1223
9:50:00	0.0966	0.0987	0.0977	0.0966	0.0958	0.0968	0.1252	0.13	0.1259	0.1248	0.1225
10:00:00	0.0966	0.0987	0.0982	0.0959	0.0956	0.0969	0.1256	0.13	0.1264	0.1242	0.1226
10:10:00	0.0967	0.0987	0.0983	0.0962	0.0958	0.0971	0.1257	0.1302	0.1271	0.1243	0.1227
10:20:00	0.0963	0.0991	0.0981	0.0955	0.0956	0.0968	0.1255	0.13	0.1274	0.1248	0.1227
10:30:00	0.0969	0.099	0.0987	0.0962	0.0958	0.0973	0.1255	0.1304	0.1262	0.1243	0.123
10:40:00	0.0966	0.0988	0.0984	0.0959	0.0957	0.097	0.1256	0.1304	0.1265	0.1245	0.1228
10:50:00	0.0966	0.099	0.0982	0.0962	0.0958	0.0973	0.126	0.1305	0.1279	0.1246	0.1231
11:00:00	0.0964	0.0992	0.0986	0.096	0.0958	0.0971	0.1257	0.1304	0.1275	0.1248	0.1228
11:10:00	0.0967	0.0992	0.0981	0.096	0.0958	0.0972	0.1258	0.1304	0.1275	0.1246	0.123
11:20:00	0.0966	0.0994	0.0981	0.0955	0.0956	0.0971	0.1257	0.1303	0.1273	0.1246	0.1227
11:30:00	0.0967	0.0993	0.0983	0.0965	0.096	0.0973	0.1259	0.1305	0.1279	0.1245	0.1228
11:40:00	0.0968	0.0995	0.0987	0.096	0.0959	0.0973	0.1255	0.1304	0.1269	0.1246	0.1225
11:50:00	0.0968	0.0992	0.0978	0.0966	0.0959	0.097	0.1256	0.1304	0.1264	0.1249	0.1225
12:00:00	0.0965	0.0992	0.0983	0.0964	0.0957	0.0971	0.1254	0.1303	0.1271	0.1246	0.1224
12:10:00	0.0972	0.0993	0.0988	0.0963	0.096	0.0975	0.1254	0.1304	0.1265	0.1243	0.1225
12:20:00	0.0966	0.0991	0.0982	0.0965	0.0958	0.0971	0.1253	0.1302	0.1275	0.1243	0.1222
12:30:00	0.0971	0.0992	0.0987	0.0962	0.096	0.0974	0.1253	0.1302	0.1263	0.1243	0.1223
12:40:00	0.0968	0.0996	0.0987	0.096	0.0959	0.0972	0.1252	0.1302	0.1266	0.1244	0.1222
12:50:00	0.0967	0.0996	0.0984	0.0965	0.0959	0.0974	0.125	0.1303	0.1279	0.1241	0.122
13:00:00	0.0968	0.0997	0.0982	0.0965	0.0958	0.0972	0.1251	0.1301	0.1276	0.1241	0.1219
13:10:00	0.0966	0.0993	0.098	0.0971	0.0959	0.0972	0.1251	0.1301	0.1269	0.1245	0.1222
13:20:00	0.0965	0.0994	0.0982	0.0965	0.0958	0.0971	0.125	0.1299	0.1268	0.1243	0.1221
13:30:00	0.0973	0.0996	0.0988	0.0964	0.0962	0.0976	0.1249	0.1301	0.1264	0.1239	0.1221
13:40:00	0.0965	0.0994	0.0983	0.0965	0.0959	0.0971	0.125	0.13	0.1267	0.1241	0.1218
13:50:00	0.0968	0.0997	0.0983	0.0967	0.0961	0.0974	0.1249	0.13	0.1274	0.1239	0.1218
14:00:00	0.0965	0.0994	0.0982	0.0965	0.0959	0.0971	0.1246	0.1301	0.1265	0.1241	0.1216
14:10:00	0.0968	0.0999	0.0984	0.0967	0.096	0.0974	0.1245	0.13	0.1269	0.1237	0.1218
14:20:00	0.0969	0.0995	0.0988	0.0963	0.0962	0.0973	0.1245	0.1298	0.1264	0.1238	0.1215
14:30:00	0.0968	0.0998	0.0985	0.0968	0.0963	0.0974	0.1245	0.13	0.1267	0.1236	0.1216
14:40:00	0.0967	0.0999	0.0983	0.0964	0.0961	0.0972	0.1244	0.1298	0.1268	0.1236	0.1213
14:50:00	0.0973	0.0998	0.099	0.0965	0.0964	0.0975	0.1244	0.1297	0.1265	0.1235	0.1214
15:00:00	0.097	0.0997	0.0989	0.0963	0.0963	0.0974	0.1242	0.1296	0.1263	0.1236	0.1213
15:10:00	0.0972	0.0996	0.099	0.0964	0.0963	0.0975	0.1241	0.1297	0.1261	0.1234	0.1215
15:20:00	0.0967	0.0998	0.0983	0.0967	0.0962	0.0971	0.1241	0.1297	0.1261	0.1235	0.1213
15:30:00	0.0971	0.0995	0.0988	0.0969	0.0961	0.0972	0.1242	0.1293	0.1265	0.1239	0.1214
15:40:00	0.0967	0.0998	0.0989	0.0965	0.0958	0.0972	0.1242	0.1295	0.1266	0.1234	0.1209
15:50:00	0.0973	0.0997	0.0991	0.0965	0.0964	0.0977	0.1244	0.1295	0.1262	0.1232	0.1213
16:00:00	0.0968	0.1001	0.0984	0.0966	0.096	0.0972	0.1238	0.1295	0.1266	0.1233	0.1209
16:10:00	0.0968	0.0994	0.0993	0.0972	0.0959	0.0971	0.1236	0.1292	0.1258	0.1236	0.1211
16:20:00	0.0971	0.0994	0.099	0.0965	0.0963	0.0974	0.1238	0.1294	0.1262	0.1233	0.1207
16:30:00	0.0973	0.0994	0.099	0.0965	0.0964	0.0977	0.1237	0.1292	0.1261	0.1231	0.1209
16:40:00	0.0968	0.0997	0.0985	0.0966	0.0961	0.0973	0.1237	0.1293	0.1262	0.1231	0.1207
16:50:00	0.0969	0.0994	0.0986	0.0968	0.0962	0.0975	0.1237	0.1293	0.1262	0.1228	0.1209
17:00:00	0.0967	0.0994	0.0984	0.0967	0.0961	0.0973	0.1238	0.1295	0.1263	0.1231	0.1206
17:10:00	0.0969	0.0994	0.0986	0.0969	0.0962	0.0974	0.1235	0.1292	0.126	0.1229	0.1208
17:20:00	0.0969	0.0994	0.0985	0.0964	0.0963	0.0974	0.1235	0.1292	0.1263	0.1232	0.1206
17:30:00	0.097	0.0994	0.0982	0.0973	0.0964	0.0973	0.1233	0.1292	0.1262	0.1234	0.1208
17:40:00	0.0968	0.0995	0.0985	0.0967	0.0963	0.0973	0.1234	0.1292	0.126	0.123	0.1204
17:50:00	0.0969	0.0992	0.0987	0.0968	0.0964	0.0975	0.1232	0.1291	0.1258	0.1228	0.1204
18:00:00	0.0969	0.0995	0.0984	0.0966	0.0963	0.0972	0.1235	0.1292	0.126	0.1229	0.1203
18:10:00	0.097	0.0991	0.0987	0.097	0.0965	0.0975	0.1232	0.1289	0.1262	0.1227	0.1203
18:20:00	0.0967	0.0996	0.0985	0.0969	0.0967	0.0974	0.1233	0.1291	0.1257	0.1228	0.1202
18:30:00	0.0971	0.0994	0.0988	0.0969	0.0969	0.0974	0.1229	0.129	0.126	0.1227	0.1204
18:40:00	0.0968	0.0994	0.0985	0.0968	0.097	0.0973	0.1232	0.1289	0.1258	0.1227	0.1201
18:50:00	0.097	0.0993	0.0988	0.097	0.097	0.0975	0.1231	0.1289	0.1257	0.1225	0.1202
19:00:00	0.0971	0.0993	0.0991	0.0966	0.0973	0.0974	0.1229	0.1288	0.1258	0.1228	0.1198
19:10:00	0.0974	0.0992	0.0993	0.0967	0.0977	0.0978	0.1229	0.1286	0.1256	0.1225	0.1198
19:20:00	0.0969	0.0995	0.0986	0.0969	0.0976	0.0973	0.1228	0.1289	0.1259	0.1226	0.1197
19:30:00	0.0972	0.0993	0.0994	0.0969	0.098	0.0976	0.1227	0.1288	0.1256	0.1225	0.1199
19:40:00	0.0968	0.0996	0.0986	0.0969	0.0982	0.0974	0.1226	0.1289	0.1256	0.1225	0.1197
19:50:00	0.0972	0.0991	0.0984	0.0973	0.0985	0.0973	0.1227	0.1286	0.1254	0.1226	0.1198
20:00:00	0.0971	0.0992	0.0992	0.0966	0.099	0.0975	0.1227	0.1285	0.1257	0.1225	0.1195
20:10:00	0.0974	0.0996	0.0994	0.0967	0.0996	0.0977	0.1228	0.1285	0.1256	0.1221	0.1196
20:20:00	0.0969	0.0993	0.0988	0.0971	0.0998	0.0975	0.1225	0.1285	0.1254	0.1223	0.1194
20:30:00	0.0973	0.0996	0.0989	0.0971	0.1004	0.0975	0.1224	0.1286	0.1254	0.1222	0.1196
20:40:00	0.0972	0.0993	0.0993	0.0966	0.1012	0.0975	0.1223	0.1284	0.1256	0.1223	0.1194
20:50:00	0.0975	0.0996	0.0994	0.0969	0.1021	0.0979	0.1224	0.1284	0.1258	0.122	0.1194
21:00:00	0.0972	0.0995	0.0993	0.0966	0.1027	0.0976	0.1225	0.1283	0.1256	0.122	0.1191
21:10:00	0.0972	0.0995	0.1008	0.0971	0.1037	0.0976	0.1222	0.1285	0.1255	0.122	0.1193
21:20:00	0.0972	0.0996	0.0993	0.0967	0.1049	0.0977	0.1224	0.1284	0.1256	0.1222	0.1191
21:30:00	0.0971	0.0996	0.0989	0.0972	0.106	0.0976	0.1223	0.1283	0.1254	0.1219	0.1193
21:40:00	0.0972	0.0993	0.0987	0.097	0.1074	0.0976	0.1219	0.1283	0.1257	0.122	0.1192
21:50:00	0.0976	0.0996	0.0994	0.0967	0.1093	0.0979	0.1222	0.1281	0.1254	0.1218	0.1191
22:00:00	0.0972	0.0995	0.0993	0.0967	0.1111	0.0976	0.1221	0.128	0.1257	0.122	0.1191
22:10:00	0.0975	0.0996	0.0994	0.0969	0.1129	0.0978	0.122	0.1281	0.1257	0.1218	0.1191
22:20:00	0.0972	0.0998	0.0989	0.0972	0.1146	0.0977	0.1218	0.128	0.1259	0.1219	0.1189
22:30:00	0.0976	0.0997	0.0993	0.0966	0.1164	0.0978	0.122	0.1282	0.1258	0.1218	0.119
22:40:00	0.0971	0.0995	0.101	0.0967	0.1182	0.0977	0.1221	0.1281	0.1255	0.122	0.1188
22:50:00	0.0973	0.0998	0.099	0.0973	0.1192	0.0977	0.1222	0.1282	0.1254	0.1216	0.1189
23:00:00	0.0971	0.0998	0.0989	0.0972	0.1203	0.0975	0.1219	0.128	0.1256	0.1218	0.1186
23:10:00	0.0973	0.0998	0.0991	0.0973	0.1212	0.0977	0.1218	0.128	0.1255	0.1217	0.1188
23:20:00	0.0972	0.0998	0.0988	0.0973	0.1216	0.0975	0.1217	0.1279	0.1257	0.1218	0.1185
23:30:00	0.0974	0.0997	0.099	0.0974	0.1215	0.0977	0.1219	0.128	0.1252	0.1216	0.1187
23:40:00	0.0973	0.0996	0.0995	0.0967	0.1211	0.0978	0.1215	0.1278	0.1256	0.1219	0.1183
23:50:00	0.0976	0.0993	0.0995	0.0969	0.1204	0.0979	0.1217	0.1279	0.126	0.1214	0.1184
24:00:00	0.0974	0.0995	0.0994	0.0966	0.1203	0.0977	0.1216	0.1278	0.1261	0.1219	0.1182
24:10:00	0.0974	0.0994	0.0989	0.0973	0.1198	0.0977	0.1214	0.1278	0.1257	0.1216	0.1183
24:20:00	0.0973	0.0997	0.0988	0.0972	0.1198	0.0976	0.1215	0.1278	0.1257	0.1215	0.1182
24:30:00	0.0975	0.0997	0.0992	0.0974	0.1199	0.0977	0.1216	0.1277	0.1254	0.1218	0.1182
24:40:00	0.0973	0.0998	0.0991	0.0975	0.1198	0.0977	0.1214	0.1278	0.1256	0.1217	0.1183
24:50:00	0.0975	0.0993	0.0993	0.0975	0.1198	0.0976	0.1214	0.1276	0.1252	0.1215	0.1183
25:00:00	0.0973	0.0996	0.0991	0.0972	0.1199	0.0977	0.1213	0.1274	0.1253	0.1217	0.1181
25:10:00	0.0973	0.0998	0.0998	0.0971	0.1196	0.0978	0.1213	0.1277	0.1257	0.1214	0.1182
25:20:00	0.0974	0.0994	0.1007	0.0967	0.1198	0.0977	0.1213	0.1274	0.1254	0.1216	0.1181
25:30:00	0.0974	0.0998	0.1001	0.0972	0.1198	0.0978	0.1212	0.1277	0.1256	0.1213	0.1181
25:40:00	0.0974	0.0997	0.0991	0.0975	0.1198	0.0978	0.1212	0.1275	0.1251	0.1215	0.118
25:50:00	0.0976	0.0997	0.0997	0.0971	0.1198	0.0978	0.1211	0.1275	0.1258	0.1214	0.1181
26:00:00	0.0973	0.0994	0.0997	0.0965	0.1197	0.0977	0.1212	0.1276	0.1251	0.1213	0.118
26:10:00	0.0973	0.0998	0.1005	0.0975	0.1194	0.0977	0.1212	0.1274	0.1248	0.1211	0.1179
26:20:00	0.0972	0.0995	0.0997	0.0969	0.1196	0.0978	0.1209	0.1275	0.1254	0.1213	0.1178
26:30:00	0.0974	0.0997	0.0997	0.0976	0.1195	0.0975	0.121	0.1274	0.1251	0.121	0.1179
26:40:00	0.0974	0.0997	0.0993	0.0975	0.1193	0.0978	0.121	0.1275	0.1251	0.1211	0.1178
26:50:00	0.0975	0.0998	0.0996	0.0976	0.1192	0.0978	0.121	0.1275	0.125	0.1211	0.1179
27:00:00	0.0975	0.0998	0.0992	0.0975	0.1191	0.0978	0.1208	0.1273	0.1253	0.1211	0.1177
27:10:00	0.0976	0.0998	0.0994	0.0976	0.1192	0.0977	0.121	0.1274	0.1248	0.1211	0.1178
27:20:00	0.0973	0.0998	0.1004	0.0976	0.1191	0.0978	0.1211	0.1273	0.1253	0.1212	0.1177
27:30:00	0.0974	0.0999	0.0995	0.0977	0.1191	0.0977	0.1208	0.1273	0.1248	0.1209	0.1178
27:40:00	0.0975	0.0998	0.1003	0.0969	0.1189	0.0978	0.1204	0.1274	0.1249	0.1211	0.1175
27:50:00	0.0977	0.0999	0.0994	0.0976	0.1189	0.0976	0.1206	0.1273	0.1248	0.121	0.1175
28:00:00	0.0974	0.0998	0.0994	0.0972	0.1188	0.0976	0.1207	0.1272	0.1249	0.121	0.1175
28:10:00	0.0975	0.0998	0.0996	0.0976	0.1188	0.0975	0.1206	0.1271	0.125	0.1208	0.1173
28:20:00	0.0974	0.0997	0.0998	0.097	0.1186	0.0976	0.1205	0.1271	0.1251	0.1209	0.1173
28:30:00	0.0975	0.1	0.0995	0.0978	0.1186	0.0978	0.1207	0.1272	0.125	0.1207	0.1176
28:40:00	0.0976	0.0997	0.0994	0.0975	0.1188	0.0977	0.1204	0.1272	0.1249	0.1209	0.1174
28:50:00	0.0976	0.0998	0.0995	0.0977	0.1185	0.098	0.1204	0.1272	0.1251	0.1208	0.1174
29:00:00	0.0973	0.0996	0.0993	0.0976	0.1185	0.0976	0.1207	0.127	0.1248	0.1209	0.1171
29:10:00	0.0974	0.1001	0.0997	0.0977	0.1183	0.0977	0.1204	0.1271	0.1246	0.1207	0.1173
29:20:00	0.0974	0.0997	0.0998	0.097	0.1184	0.0979	0.1204	0.127	0.125	0.1209	0.1171
29:30:00	0.0975	0.1002	0.1	0.0974	0.1183	0.098	0.1203	0.127	0.1252	0.1206	0.1174
29:40:00	0.0978	0.1	0.0994	0.0975	0.1183	0.0976	0.1204	0.127	0.1247	0.1209	0.1171
29:50:00	0.0976	0.1001	0.0996	0.0978	0.1182	0.0976	0.1203	0.1268	0.125	0.1206	0.1169
30:00:00	0.0974	0.0998	0.0995	0.0976	0.1182	0.0979	0.1203	0.127	0.1246	0.1206	0.117
30:10:00	0.0976	0.1	0.0996	0.0976	0.1179	0.0976	0.1203	0.1269	0.1247	0.1205	0.1169
30:20:00	0.0974	0.0998	0.0995	0.0977	0.1181	0.0979	0.1203	0.1269	0.1247	0.1206	0.1169
30:30:00	0.098	0.0999	0.0997	0.0977	0.1179	0.0975	0.1203	0.1269	0.1242	0.1206	0.1168
30:40:00	0.0975	0.0998	0.0996	0.0976	0.1179	0.0977	0.1203	0.1269	0.1246	0.1207	0.1166
30:50:00	0.0976	0.0996	0.1	0.0974	0.1178	0.0979	0.1201	0.1267	0.1251	0.1204	0.1169
31:00:00	0.0976	0.0998	0.0998	0.0971	0.1176	0.0978	0.12	0.1268	0.1245	0.1205	0.1165
31:10:00	0.0978	0.1	0.0997	0.0978	0.1177	0.0976	0.1201	0.1267	0.1243	0.1204	0.1167
31:20:00	0.0975	0.1	0.0998	0.0971	0.1178	0.098	0.12	0.1269	0.1246	0.1204	0.1164
31:30:00	0.0977	0.0996	0.1	0.0975	0.1177	0.098	0.12	0.1265	0.125	0.1203	0.1167
31:40:00	0.0977	0.0998	0.0996	0.0975	0.1177	0.0977	0.1201	0.1267	0.1245	0.1205	0.1165
31:50:00	0.0975	0.1003	0.0997	0.098	0.1174	0.0979	0.1201	0.1268	0.1246	0.1202	0.1165
32:00:00	0.0977	0.0999	0.1002	0.0971	0.1176	0.0978	0.12	0.1268	0.1243	0.1203	0.1163
32:10:00	0.0977	0.1001	0.1	0.0975	0.1175	0.098	0.12	0.1266	0.1249	0.1202	0.1165
32:20:00	0.0979	0.0998	0.0995	0.0976	0.1174	0.0979	0.12	0.1267	0.1244	0.1204	0.1163
32:30:00	0.0978	0.1001	0.0998	0.0974	0.1173	0.0977	0.1198	0.1267	0.1247	0.1202	0.1163
32:40:00	0.0977	0.0999	0.0996	0.0977	0.1174	0.0978	0.12	0.1267	0.1244	0.1202	0.1163
32:50:00	0.0979	0.0999	0.1	0.0974	0.1172	0.0978	0.1199	0.1265	0.1247	0.1201	0.1162
33:00:00	0.098	0.1	0.1001	0.0971	0.1173	0.0979	0.1198	0.1267	0.1244	0.1201	0.1163
33:10:00	0.098	0.1002	0.0998	0.0979	0.117	0.0977	0.1198	0.1267	0.1245	0.1201	0.1162
33:20:00	0.0982	0.1001	0.0996	0.0977	0.1172	0.0977	0.1199	0.1267	0.1243	0.1202	0.1163
33:30:00	0.0983	0.1002	0.0999	0.0979	0.1169	0.0977	0.1198	0.1268	0.124	0.12	0.1161
33:40:00	0.0984	0.0996	0.0997	0.0973	0.1171	0.0978	0.1198	0.1266	0.1242	0.12	0.1161
33:50:00	0.0983	0.0998	0.1	0.0976	0.117	0.098	0.1196	0.1263	0.1249	0.1202	0.1161
34:00:00	0.0981	0.0999	0.0996	0.0976	0.117	0.0978	0.1197	0.1266	0.1241	0.1202	0.1163
34:10:00	0.0983	0.1006	0.0998	0.0978	0.1168	0.0979	0.1198	0.1266	0.1242	0.1199	0.1161
34:20:00	0.0984	0.1001	0.0997	0.0977	0.1168	0.0978	0.1198	0.1266	0.1241	0.12	0.1162
34:30:00	0.0982	0.1003	0.0999	0.098	0.1167	0.0978	0.1198	0.1264	0.1244	0.1198	0.1162
34:40:00	0.0985	0.0998	0.0999	0.0972	0.1168	0.098	0.1196	0.1263	0.1241	0.12	0.116
34:50:00	0.0982	0.1003	0.0999	0.098	0.1168	0.0979	0.1196	0.1264	0.1245	0.12	0.1161
35:00:00	0.0983	0.0999	0.0998	0.0976	0.1168	0.0977	0.1196	0.1263	0.124	0.12	0.1158
35:10:00	0.0982	0.1003	0.1	0.098	0.1166	0.0978	0.1192	0.1264	0.1244	0.1199	0.1159
35:20:00	0.0984	0.1	0.0999	0.0971	0.1166	0.0977	0.1196	0.1263	0.1239	0.1199	0.1158
35:30:00	0.0984	0.1002	0.1003	0.0978	0.1166	0.0977	0.1193	0.1262	0.1238	0.1198	0.1159
35:40:00	0.0985	0.1003	0.0999	0.097	0.1166	0.0979	0.1194	0.1264	0.1242	0.12	0.1157
35:50:00	0.0984	0.1004	0.1004	0.098	0.1164	0.0978	0.1193	0.1264	0.1246	0.1197	0.1158
36:00:00	0.0986	0.1	0.0999	0.0972	0.1164	0.0981	0.1195	0.1263	0.1242	0.12	0.1157
36:10:00	0.0984	0.1006	0.1001	0.0982	0.1163	0.0979	0.1194	0.1263	0.1243	0.1197	0.1158
36:20:00	0.0984	0.1002	0.0998	0.0976	0.1166	0.0978	0.1192	0.1263	0.1236	0.1197	0.1156
36:30:00	0.0985	0.1001	0.1001	0.0977	0.1167	0.0981	0.1194	0.1262	0.1244	0.1195	0.1156
36:40:00	0.0986	0.1003	0.0998	0.0978	0.117	0.098	0.1194	0.1264	0.1239	0.1198	0.1157
36:50:00	0.0986	0.1005	0.1	0.0972	0.1171	0.0978	0.1193	0.1263	0.124	0.1198	0.1156
37:00:00	0.0985	0.1004	0.1	0.0969	0.1169	0.098	0.1191	0.1261	0.1237	0.1197	0.1156
37:10:00	0.0985	0.1002	0.1002	0.0967	0.1168	0.0981	0.1196	0.1261	0.1244	0.1195	0.1155
37:20:00	0.0984	0.1003	0.0999	0.0969	0.1169	0.0981	0.1191	0.1262	0.1237	0.1197	0.1154
37:30:00	0.0985	0.1007	0.1002	0.097	0.1169	0.0979	0.1192	0.126	0.1242	0.1194	0.1156
37:40:00	0.0985	0.1002	0.0999	0.0969	0.117	0.098	0.1191	0.1262	0.1239	0.1196	0.1155
37:50:00	0.0986	0.1006	0.1001	0.0971	0.1168	0.098	0.1193	0.126	0.1238	0.1196	0.1157
38:00:00	0.0985	0.1002	0.1	0.0967	0.117	0.0979	0.1191	0.1261	0.1238	0.1197	0.1154
38:10:00	0.0986	0.1003	0.1002	0.097	0.1168	0.0981	0.1193	0.1259	0.1241	0.1194	0.1153
38:20:00	0.0986	0.1002	0.1002	0.0971	0.1167	0.0979	0.1191	0.1261	0.1239	0.1194	0.1152
38:30:00	0.0986	0.1002	0.1003	0.0969	0.1166	0.098	0.1192	0.1259	0.124	0.1194	0.1153
38:40:00	0.0986	0.1003	0.1009	0.0969	0.1167	0.0978	0.119	0.1261	0.1234	0.1194	0.1152
38:50:00	0.0986	0.1003	0.1001	0.0968	0.1167	0.0982	0.1192	0.1259	0.1241	0.1195	0.1153
39:00:00	0.0989	0.1005	0.1001	0.097	0.1165	0.0979	0.1187	0.1259	0.1236	0.1195	0.1152
39:10:00	0.0985	0.1006	0.1013	0.097	0.1166	0.0978	0.1187	0.1259	0.1239	0.1192	0.1152
39:20:00	0.0987	0.1003	0.1001	0.0965	0.1165	0.0982	0.1182	0.1259	0.1236	0.1194	0.115
39:30:00	0.0984	0.1007	0.1002	0.0972	0.1166	0.0981	0.1184	0.126	0.1237	0.1191	0.1151
39:40:00	0.0987	0.1001	0.1001	0.0965	0.1164	0.0981	0.1181	0.1259	0.1235	0.1193	0.1151
39:50:00	0.0989	0.1002	0.1004	0.0973	0.1164	0.0982	0.1184	0.1257	0.1239	0.1193	0.1152
40:00:00	0.0985	0.1003	0.1002	0.0971	0.1164	0.0981	0.1182	0.1258	0.1235	0.1193	0.1151
40:10:00	0.0988	0.1006	0.1003	0.0973	0.1162	0.098	0.1183	0.1259	0.1236	0.1192	0.1152
40:20:00	0.0986	0.1003	0.1001	0.0971	0.1161	0.0981	0.1181	0.1259	0.1233	0.1192	0.1149
40:30:00	0.0985	0.1003	0.1003	0.0972	0.1161	0.0981	0.1183	0.1258	0.124	0.1192	0.1151
40:40:00	0.0987	0.1003	0.1002	0.0969	0.116	0.0979	0.1182	0.1259	0.1236	0.1193	0.1149
40:50:00	0.0989	0.1001	0.1004	0.0971	0.116	0.0981	0.1181	0.1256	0.1237	0.119	0.1149
41:00:00	0.0988	0.1003	0.1003	0.097	0.116	0.0981	0.1181	0.1258	0.1235	0.1193	0.115
41:10:00	0.0986	0.1006	0.1003	0.0971	0.1159	0.098	0.1182	0.1258	0.1238	0.119	0.1151
41:20:00	0.0987	0.1002	0.1003	0.0968	0.116	0.098	0.1182	0.1257	0.1233	0.1192	0.1148
41:30:00	0.099	0.1003	0.1003	0.0972	0.1159	0.0979	0.1183	0.1256	0.1235	0.1189	0.115
41:40:00	0.0989	0.1002	0.1006	0.097	0.1159	0.098	0.1182	0.1258	0.1231	0.119	0.1147
41:50:00	0.0987	0.1007	0.1003	0.0973	0.1158	0.0981	0.1179	0.1257	0.1238	0.119	0.115
42:00:00	0.0989	0.1003	0.1002	0.0967	0.116	0.0982	0.118	0.1255	0.1233	0.1192	0.1147
42:10:00	0.0987	0.1007	0.102	0.0972	0.1158	0.098	0.1178	0.1257	0.1237	0.1189	0.1148
42:20:00	0.0989	0.1003	0.1002	0.0966	0.1158	0.0981	0.1177	0.1257	0.1232	0.119	0.1145
42:30:00	0.0989	0.1002	0.1004	0.0969	0.1159	0.0981	0.1181	0.1257	0.1236	0.1189	0.1147
42:40:00	0.0984	0.1	0.1001	0.0971	0.1157	0.0981	0.1179	0.1254	0.1241	0.119	0.1148
42:50:00	0.0984	0.1004	0.1004	0.0974	0.1158	0.0979	0.1182	0.1254	0.1239	0.1189	0.1148
43:00:00	0.0985	0.1003	0.1004	0.0971	0.1157	0.0979	0.118	0.1256	0.1236	0.1191	0.1145
43:10:00	0.0985	0.1001	0.1004	0.0972	0.1157	0.0983	0.1179	0.1255	0.1239	0.1191	0.1147
43:20:00	0.0985	0.1003	0.1004	0.0972	0.1155	0.098	0.1178	0.1256	0.1234	0.1188	0.1145
43:30:00	0.0984	0.1006	0.1003	0.0975	0.1158	0.0981	0.1178	0.1254	0.1233	0.1188	0.1146
43:40:00	0.0985	0.1001	0.1004	0.0974	0.1155	0.098	0.1181	0.1255	0.1233	0.119	0.1144
43:50:00	0.0985	0.1	0.1005	0.0972	0.1156	0.098	0.118	0.1253	0.1234	0.1187	0.1145
44:00:00	0.0986	0.1002	0.1003	0.0968	0.1157	0.0982	0.118	0.1256	0.1233	0.119	0.1144
44:10:00	0.0986	0.1007	0.1005	0.0975	0.1155	0.098	0.118	0.1255	0.1233	0.1188	0.1145
44:20:00	0.0985	0.1002	0.1004	0.0973	0.1156	0.0981	0.118	0.1254	0.1232	0.1187	0.1144
44:30:00	0.0984	0.1002	0.1005	0.0972	0.1155	0.0983	0.1178	0.1254	0.1236	0.1188	0.1144
44:40:00	0.0985	0.1	0.1003	0.0969	0.1156	0.0982	0.1179	0.1254	0.1232	0.1189	0.1142
44:50:00	0.0986	0.1006	0.1005	0.0974	0.1156	0.0983	0.118	0.1254	0.124	0.1189	0.1145
45:00:00	0.0986	0.1	0.1004	0.0973	0.1154	0.0982	0.1179	0.1255	0.1237	0.1189	0.1143
45:10:00	0.0988	0.1001	0.1004	0.0975	0.1155	0.0982	0.1179	0.1253	0.1235	0.1187	0.1145
45:20:00	0.0988	0.1003	0.1004	0.0972	0.1153	0.0981	0.1178	0.1253	0.1233	0.1187	0.1141
45:30:00	0.0986	0.1006	0.1005	0.0978	0.1152	0.0982	0.1178	0.1253	0.1237	0.1186	0.1146
45:40:00	0.0987	0.1002	0.1005	0.0975	0.1153	0.0979	0.1179	0.1254	0.1232	0.1188	0.1142
45:50:00	0.0985	0.1003	0.1006	0.0971	0.1152	0.0981	0.1179	0.1252	0.1233	0.1185	0.1142
46:00:00	0.0986	0.1003	0.1005	0.0974	0.1152	0.098	0.1178	0.1252	0.123	0.1185	0.1142
46:10:00	0.0987	0.1001	0.1004	0.0974	0.1152	0.0983	0.1178	0.1253	0.1236	0.1187	0.1142
46:20:00	0.0986	0.1002	0.1005	0.0975	0.1151	0.0981	0.1176	0.1253	0.1232	0.1186	0.1141
46:30:00	0.0987	0.1005	0.1005	0.0973	0.1154	0.0982	0.1178	0.1253	0.1235	0.1185	0.1142
46:40:00	0.0987	0.1	0.1004	0.0976	0.1151	0.0978	0.1178	0.1252	0.1231	0.1188	0.1139
46:50:00	0.0985	0.1005	0.1006	0.0972	0.1153	0.0982	0.1178	0.1254	0.1233	0.1183	0.1141
47:00:00	0.0989	0.1002	0.1004	0.0975	0.115	0.0981	0.1177	0.1252	0.123	0.1186	0.1139
47:10:00	0.0986	0.1001	0.1005	0.0974	0.1153	0.0983	0.1178	0.1252	0.1236	0.1185	0.114
47:20:00	0.0986	0.0999	0.1005	0.0976	0.115	0.098	0.1174	0.1252	0.1232	0.1187	0.1139
47:30:00	0.0986	0.1004	0.1005	0.0976	0.1151	0.098	0.1178	0.125	0.1231	0.1185	0.114
47:40:00	0.0986	0.1	0.1005	0.0975	0.115	0.098	0.1177	0.125	0.1232	0.1187	0.1139
47:50:00	0.0987	0.1001	0.1003	0.0976	0.115	0.0983	0.1179	0.1253	0.1239	0.1186	0.1141
48:00:00	0.0986	0.1	0.1004	0.0975	0.115	0.098	0.1179	0.1251	0.1229	0.1184	0.1137
