# Supplementary material for: Genomic and phenotypic evolution of Escherichia coli in a novel citrate-only resource environment
Source: eLife. 2020 May 29;9:e55414. doi: 10.7554/eLife.55414 (PMC7299349; doi:10.7554/eLife.55414)
Supplement: Figure 6—source data 1. [file elife-55414-fig6-data1.csv]

	Time	Temperature	Well	OD420	Name	Experiment
0	0:00:00	36	A1	0.0815	ZDBp804	DM0-growth
1	0:05:00	36.8	A1	0.0803	ZDBp804	DM0-growth
2	0:10:00	36.9	A1	0.0801	ZDBp804	DM0-growth
3	0:15:00	37	A1	0.0812	ZDBp804	DM0-growth
4	0:20:00	37	A1	0.0803	ZDBp804	DM0-growth
5	0:25:00	37	A1	0.0805	ZDBp804	DM0-growth
6	0:30:00	37	A1	0.0807	ZDBp804	DM0-growth
7	0:35:00	37	A1	0.0805	ZDBp804	DM0-growth
8	0:40:00	37	A1	0.0804	ZDBp804	DM0-growth
9	0:45:00	37	A1	0.0813	ZDBp804	DM0-growth
10	0:50:00	37	A1	0.0816	ZDBp804	DM0-growth
11	0:55:00	37	A1	0.0812	ZDBp804	DM0-growth
12	1:00:00	37	A1	0.0815	ZDBp804	DM0-growth
13	1:05:00	37	A1	0.0815	ZDBp804	DM0-growth
14	1:10:00	37	A1	0.081	ZDBp804	DM0-growth
15	1:15:00	37	A1	0.0807	ZDBp804	DM0-growth
16	1:20:00	37	A1	0.0818	ZDBp804	DM0-growth
17	1:25:00	37	A1	0.0824	ZDBp804	DM0-growth
18	1:30:00	37	A1	0.0808	ZDBp804	DM0-growth
19	1:35:00	37	A1	0.0826	ZDBp804	DM0-growth
20	1:40:00	37	A1	0.0812	ZDBp804	DM0-growth
21	1:45:00	37	A1	0.0811	ZDBp804	DM0-growth
22	1:50:00	37	A1	0.0825	ZDBp804	DM0-growth
23	1:55:00	37	A1	0.0811	ZDBp804	DM0-growth
24	2:00:00	37	A1	0.0822	ZDBp804	DM0-growth
25	2:05:00	37	A1	0.0814	ZDBp804	DM0-growth
26	2:10:00	37	A1	0.0827	ZDBp804	DM0-growth
27	2:15:00	37	A1	0.0829	ZDBp804	DM0-growth
28	2:20:00	37	A1	0.0826	ZDBp804	DM0-growth
29	2:25:00	37	A1	0.0819	ZDBp804	DM0-growth
30	2:30:00	37	A1	0.0822	ZDBp804	DM0-growth
31	2:35:00	37	A1	0.0832	ZDBp804	DM0-growth
32	2:40:00	37	A1	0.082	ZDBp804	DM0-growth
33	2:45:00	37	A1	0.0831	ZDBp804	DM0-growth
34	2:50:00	37	A1	0.0833	ZDBp804	DM0-growth
35	2:55:00	37	A1	0.0832	ZDBp804	DM0-growth
36	3:00:00	37	A1	0.0829	ZDBp804	DM0-growth
37	3:05:00	37	A1	0.0827	ZDBp804	DM0-growth
38	3:10:00	37	A1	0.0835	ZDBp804	DM0-growth
39	3:15:00	37	A1	0.0827	ZDBp804	DM0-growth
40	3:20:00	37	A1	0.0827	ZDBp804	DM0-growth
41	3:25:00	37	A1	0.0825	ZDBp804	DM0-growth
42	3:30:00	37	A1	0.0837	ZDBp804	DM0-growth
43	3:35:00	37	A1	0.0845	ZDBp804	DM0-growth
44	3:40:00	37	A1	0.0837	ZDBp804	DM0-growth
45	3:45:00	37	A1	0.0849	ZDBp804	DM0-growth
46	3:50:00	37	A1	0.0847	ZDBp804	DM0-growth
47	3:55:00	37	A1	0.0854	ZDBp804	DM0-growth
48	4:00:00	37	A1	0.0855	ZDBp804	DM0-growth
49	4:05:00	37	A1	0.0854	ZDBp804	DM0-growth
50	4:10:00	37	A1	0.0849	ZDBp804	DM0-growth
51	4:15:00	37	A1	0.085	ZDBp804	DM0-growth
52	4:20:00	37	A1	0.0845	ZDBp804	DM0-growth
53	4:25:00	37	A1	0.0859	ZDBp804	DM0-growth
54	4:30:00	37	A1	0.0852	ZDBp804	DM0-growth
55	4:35:00	37	A1	0.0855	ZDBp804	DM0-growth
56	4:40:00	37	A1	0.0855	ZDBp804	DM0-growth
57	4:45:00	37	A1	0.0855	ZDBp804	DM0-growth
58	4:50:00	37	A1	0.0872	ZDBp804	DM0-growth
59	4:55:00	37	A1	0.087	ZDBp804	DM0-growth
60	5:00:00	37	A1	0.0868	ZDBp804	DM0-growth
61	5:05:00	37	A1	0.0876	ZDBp804	DM0-growth
62	5:10:00	37	A1	0.0881	ZDBp804	DM0-growth
63	5:15:00	37	A1	0.0871	ZDBp804	DM0-growth
64	5:20:00	37	A1	0.0879	ZDBp804	DM0-growth
65	5:25:00	37	A1	0.0886	ZDBp804	DM0-growth
66	5:30:00	37	A1	0.0887	ZDBp804	DM0-growth
67	5:35:00	37	A1	0.0899	ZDBp804	DM0-growth
68	5:40:00	37	A1	0.0894	ZDBp804	DM0-growth
69	5:45:00	37	A1	0.0908	ZDBp804	DM0-growth
70	5:50:00	37	A1	0.0909	ZDBp804	DM0-growth
71	5:55:00	37	A1	0.0921	ZDBp804	DM0-growth
72	6:00:00	37	A1	0.0913	ZDBp804	DM0-growth
73	6:05:00	37	A1	0.093	ZDBp804	DM0-growth
74	6:10:00	37	A1	0.0938	ZDBp804	DM0-growth
75	6:15:00	37	A1	0.0953	ZDBp804	DM0-growth
76	6:20:00	37	A1	0.0939	ZDBp804	DM0-growth
77	6:25:00	37	A1	0.0945	ZDBp804	DM0-growth
78	6:30:00	37	A1	0.0963	ZDBp804	DM0-growth
79	6:35:00	37	A1	0.0965	ZDBp804	DM0-growth
80	6:40:00	37	A1	0.0979	ZDBp804	DM0-growth
81	6:45:00	37	A1	0.0975	ZDBp804	DM0-growth
82	6:50:00	37	A1	0.0982	ZDBp804	DM0-growth
83	6:55:00	37	A1	0.0998	ZDBp804	DM0-growth
84	7:00:00	37	A1	0.1007	ZDBp804	DM0-growth
85	7:05:00	37	A1	0.1017	ZDBp804	DM0-growth
86	7:10:00	37	A1	0.1038	ZDBp804	DM0-growth
87	7:15:00	37	A1	0.105	ZDBp804	DM0-growth
88	7:20:00	37	A1	0.1063	ZDBp804	DM0-growth
89	7:25:00	37	A1	0.1067	ZDBp804	DM0-growth
90	7:30:00	37	A1	0.1082	ZDBp804	DM0-growth
91	7:35:00	37	A1	0.1087	ZDBp804	DM0-growth
92	7:40:00	37	A1	0.1111	ZDBp804	DM0-growth
93	7:45:00	37	A1	0.1124	ZDBp804	DM0-growth
94	7:50:00	37	A1	0.114	ZDBp804	DM0-growth
95	7:55:00	37	A1	0.1156	ZDBp804	DM0-growth
96	8:00:00	37	A1	0.1175	ZDBp804	DM0-growth
97	8:05:00	37	A1	0.1183	ZDBp804	DM0-growth
98	8:10:00	37	A1	0.1208	ZDBp804	DM0-growth
99	8:15:00	37	A1	0.1234	ZDBp804	DM0-growth
100	8:20:00	37	A1	0.1253	ZDBp804	DM0-growth
101	8:25:00	37	A1	0.1273	ZDBp804	DM0-growth
102	8:30:00	37	A1	0.1299	ZDBp804	DM0-growth
103	8:35:00	37	A1	0.1325	ZDBp804	DM0-growth
104	8:40:00	37	A1	0.1346	ZDBp804	DM0-growth
105	8:45:00	37	A1	0.1378	ZDBp804	DM0-growth
106	8:50:00	37	A1	0.1404	ZDBp804	DM0-growth
107	8:55:00	37	A1	0.1428	ZDBp804	DM0-growth
108	9:00:00	37	A1	0.1449	ZDBp804	DM0-growth
109	9:05:00	37	A1	0.1478	ZDBp804	DM0-growth
110	9:10:00	37	A1	0.151	ZDBp804	DM0-growth
111	9:15:00	37	A1	0.1537	ZDBp804	DM0-growth
112	9:20:00	37	A1	0.1565	ZDBp804	DM0-growth
113	9:25:00	37	A1	0.1588	ZDBp804	DM0-growth
114	9:30:00	37	A1	0.1622	ZDBp804	DM0-growth
115	9:35:00	37	A1	0.1652	ZDBp804	DM0-growth
116	9:40:00	37	A1	0.1687	ZDBp804	DM0-growth
117	9:45:00	37	A1	0.1729	ZDBp804	DM0-growth
118	9:50:00	37	A1	0.1754	ZDBp804	DM0-growth
119	9:55:00	37	A1	0.1795	ZDBp804	DM0-growth
120	10:00:00	37	A1	0.1825	ZDBp804	DM0-growth
121	10:05:00	37	A1	0.1864	ZDBp804	DM0-growth
122	10:10:00	37	A1	0.1894	ZDBp804	DM0-growth
123	10:15:00	37	A1	0.1931	ZDBp804	DM0-growth
124	10:20:00	37	A1	0.1973	ZDBp804	DM0-growth
125	10:25:00	37	A1	0.1994	ZDBp804	DM0-growth
126	10:30:00	37	A1	0.2042	ZDBp804	DM0-growth
127	10:35:00	37	A1	0.2063	ZDBp804	DM0-growth
128	10:40:00	37	A1	0.2117	ZDBp804	DM0-growth
129	10:45:00	37	A1	0.2142	ZDBp804	DM0-growth
130	10:50:00	37	A1	0.217	ZDBp804	DM0-growth
131	10:55:00	37	A1	0.2207	ZDBp804	DM0-growth
132	11:00:00	37	A1	0.2249	ZDBp804	DM0-growth
133	11:05:00	37	A1	0.231	ZDBp804	DM0-growth
134	11:10:00	37	A1	0.2363	ZDBp804	DM0-growth
135	11:15:00	37	A1	0.2438	ZDBp804	DM0-growth
136	11:20:00	37	A1	0.2498	ZDBp804	DM0-growth
137	11:25:00	37	A1	0.2567	ZDBp804	DM0-growth
138	11:30:00	37	A1	0.2625	ZDBp804	DM0-growth
139	11:35:00	37	A1	0.2699	ZDBp804	DM0-growth
140	11:40:00	37	A1	0.2784	ZDBp804	DM0-growth
141	11:45:00	37	A1	0.2811	ZDBp804	DM0-growth
142	11:50:00	37	A1	0.2825	ZDBp804	DM0-growth
143	11:55:00	37	A1	0.2826	ZDBp804	DM0-growth
144	12:00:00	37	A1	0.2828	ZDBp804	DM0-growth
145	12:05:00	37	A1	0.281	ZDBp804	DM0-growth
146	12:10:00	37	A1	0.2801	ZDBp804	DM0-growth
147	12:15:00	37	A1	0.2849	ZDBp804	DM0-growth
148	12:20:00	37	A1	0.2887	ZDBp804	DM0-growth
149	12:25:00	37	A1	0.2835	ZDBp804	DM0-growth
150	12:30:00	37	A1	0.2858	ZDBp804	DM0-growth
151	12:35:00	37	A1	0.2855	ZDBp804	DM0-growth
152	12:40:00	37	A1	0.2737	ZDBp804	DM0-growth
153	12:45:00	37	A1	0.2731	ZDBp804	DM0-growth
154	12:50:00	37	A1	0.2719	ZDBp804	DM0-growth
155	12:55:00	37	A1	0.2711	ZDBp804	DM0-growth
156	13:00:00	37	A1	0.2714	ZDBp804	DM0-growth
157	13:05:00	37	A1	0.2711	ZDBp804	DM0-growth
158	13:10:00	37	A1	0.286	ZDBp804	DM0-growth
159	13:15:00	37	A1	0.2895	ZDBp804	DM0-growth
160	13:20:00	37	A1	0.2783	ZDBp804	DM0-growth
161	13:25:00	37	A1	0.2906	ZDBp804	DM0-growth
162	13:30:00	37	A1	0.2816	ZDBp804	DM0-growth
163	13:35:00	37	A1	0.2888	ZDBp804	DM0-growth
164	13:40:00	37	A1	0.2857	ZDBp804	DM0-growth
165	13:45:00	37	A1	0.2874	ZDBp804	DM0-growth
166	13:50:00	37	A1	0.2837	ZDBp804	DM0-growth
167	13:55:00	37	A1	0.304	ZDBp804	DM0-growth
168	14:00:00	37	A1	0.2958	ZDBp804	DM0-growth
169	14:05:00	37	A1	0.2809	ZDBp804	DM0-growth
170	14:10:00	37	A1	0.2774	ZDBp804	DM0-growth
171	14:15:00	37	A1	0.2769	ZDBp804	DM0-growth
172	14:20:00	37	A1	0.2817	ZDBp804	DM0-growth
173	14:25:00	37	A1	0.2844	ZDBp804	DM0-growth
174	14:30:00	37	A1	0.2771	ZDBp804	DM0-growth
175	14:35:00	37	A1	0.278	ZDBp804	DM0-growth
176	14:40:00	37	A1	0.2783	ZDBp804	DM0-growth
177	14:45:00	37	A1	0.2823	ZDBp804	DM0-growth
178	14:50:00	37	A1	0.2799	ZDBp804	DM0-growth
179	14:55:00	37	A1	0.278	ZDBp804	DM0-growth
180	15:00:00	37	A1	0.2782	ZDBp804	DM0-growth
181	15:05:00	37	A1	0.2797	ZDBp804	DM0-growth
182	15:10:00	37	A1	0.2797	ZDBp804	DM0-growth
183	15:15:00	37	A1	0.2808	ZDBp804	DM0-growth
184	15:20:00	37	A1	0.2774	ZDBp804	DM0-growth
185	15:25:00	37	A1	0.2802	ZDBp804	DM0-growth
186	15:30:00	37	A1	0.279	ZDBp804	DM0-growth
187	15:35:00	37	A1	0.2763	ZDBp804	DM0-growth
188	15:40:00	37	A1	0.2775	ZDBp804	DM0-growth
189	15:45:00	37	A1	0.2764	ZDBp804	DM0-growth
190	15:50:00	37	A1	0.2751	ZDBp804	DM0-growth
191	15:55:00	37	A1	0.2749	ZDBp804	DM0-growth
192	16:00:00	37	A1	0.277	ZDBp804	DM0-growth
193	16:05:00	37	A1	0.2793	ZDBp804	DM0-growth
194	16:10:00	37	A1	0.278	ZDBp804	DM0-growth
195	16:15:00	37	A1	0.2844	ZDBp804	DM0-growth
196	16:20:00	37	A1	0.2837	ZDBp804	DM0-growth
197	16:25:00	37	A1	0.2814	ZDBp804	DM0-growth
198	16:30:00	37	A1	0.2835	ZDBp804	DM0-growth
199	16:35:00	37	A1	0.2831	ZDBp804	DM0-growth
200	16:40:00	37	A1	0.2828	ZDBp804	DM0-growth
201	16:45:00	37	A1	0.2823	ZDBp804	DM0-growth
202	16:50:00	37	A1	0.2815	ZDBp804	DM0-growth
203	16:55:00	37	A1	0.276	ZDBp804	DM0-growth
204	17:00:00	37	A1	0.2756	ZDBp804	DM0-growth
205	17:05:00	37	A1	0.2804	ZDBp804	DM0-growth
206	17:10:00	37	A1	0.2779	ZDBp804	DM0-growth
207	17:15:00	37	A1	0.277	ZDBp804	DM0-growth
208	17:20:00	37	A1	0.276	ZDBp804	DM0-growth
209	17:25:00	37	A1	0.2767	ZDBp804	DM0-growth
210	17:30:00	37	A1	0.2764	ZDBp804	DM0-growth
211	17:35:00	37	A1	0.2768	ZDBp804	DM0-growth
212	17:40:00	37	A1	0.2767	ZDBp804	DM0-growth
213	17:45:00	37	A1	0.2769	ZDBp804	DM0-growth
214	17:50:00	37	A1	0.2774	ZDBp804	DM0-growth
215	17:55:00	37	A1	0.2756	ZDBp804	DM0-growth
216	18:00:00	37	A1	0.2823	ZDBp804	DM0-growth
217	18:05:00	37	A1	0.2788	ZDBp804	DM0-growth
218	18:10:00	37	A1	0.2778	ZDBp804	DM0-growth
219	18:15:00	37	A1	0.279	ZDBp804	DM0-growth
220	18:20:00	37	A1	0.2785	ZDBp804	DM0-growth
221	18:25:00	37	A1	0.2786	ZDBp804	DM0-growth
222	18:30:00	37	A1	0.2769	ZDBp804	DM0-growth
223	18:35:00	37	A1	0.2783	ZDBp804	DM0-growth
224	18:40:00	37	A1	0.2804	ZDBp804	DM0-growth
225	18:45:00	37	A1	0.2795	ZDBp804	DM0-growth
226	18:50:00	37	A1	0.281	ZDBp804	DM0-growth
227	18:55:00	37	A1	0.2761	ZDBp804	DM0-growth
228	19:00:00	37	A1	0.278	ZDBp804	DM0-growth
229	19:05:00	37	A1	0.2771	ZDBp804	DM0-growth
230	19:10:00	37	A1	0.2781	ZDBp804	DM0-growth
231	19:15:00	37	A1	0.2798	ZDBp804	DM0-growth
232	19:20:00	37	A1	0.2787	ZDBp804	DM0-growth
233	19:25:00	37	A1	0.2773	ZDBp804	DM0-growth
234	19:30:00	37	A1	0.2785	ZDBp804	DM0-growth
235	19:35:00	37	A1	0.2763	ZDBp804	DM0-growth
236	19:40:00	37	A1	0.2755	ZDBp804	DM0-growth
237	19:45:00	37	A1	0.2793	ZDBp804	DM0-growth
238	19:50:00	37	A1	0.2748	ZDBp804	DM0-growth
239	19:55:00	37	A1	0.2756	ZDBp804	DM0-growth
240	20:00:00	37	A1	0.2742	ZDBp804	DM0-growth
241	20:05:00	37	A1	0.2742	ZDBp804	DM0-growth
242	20:10:00	37	A1	0.2746	ZDBp804	DM0-growth
243	20:15:00	37	A1	0.2733	ZDBp804	DM0-growth
244	20:20:00	37	A1	0.2746	ZDBp804	DM0-growth
245	20:25:00	37	A1	0.2718	ZDBp804	DM0-growth
246	20:30:00	37	A1	0.2743	ZDBp804	DM0-growth
247	20:35:00	37	A1	0.2752	ZDBp804	DM0-growth
248	20:40:00	37	A1	0.2733	ZDBp804	DM0-growth
249	20:45:00	37	A1	0.2723	ZDBp804	DM0-growth
250	20:50:00	37	A1	0.2753	ZDBp804	DM0-growth
251	20:55:00	37	A1	0.2735	ZDBp804	DM0-growth
252	21:00:00	37	A1	0.2735	ZDBp804	DM0-growth
253	21:05:00	37	A1	0.2746	ZDBp804	DM0-growth
254	21:10:00	37	A1	0.2717	ZDBp804	DM0-growth
255	21:15:00	37	A1	0.2725	ZDBp804	DM0-growth
256	21:20:00	37	A1	0.2717	ZDBp804	DM0-growth
257	21:25:00	37	A1	0.2735	ZDBp804	DM0-growth
258	21:30:00	37	A1	0.2722	ZDBp804	DM0-growth
259	21:35:00	37	A1	0.2733	ZDBp804	DM0-growth
260	21:40:00	37	A1	0.2732	ZDBp804	DM0-growth
261	21:45:00	37	A1	0.2735	ZDBp804	DM0-growth
262	21:50:00	37	A1	0.273	ZDBp804	DM0-growth
263	21:55:00	37	A1	0.272	ZDBp804	DM0-growth
264	22:00:00	37	A1	0.2723	ZDBp804	DM0-growth
265	22:05:00	37	A1	0.2725	ZDBp804	DM0-growth
266	22:10:00	37	A1	0.2725	ZDBp804	DM0-growth
267	22:15:00	37	A1	0.272	ZDBp804	DM0-growth
268	22:20:00	37	A1	0.2721	ZDBp804	DM0-growth
269	22:25:00	37	A1	0.2715	ZDBp804	DM0-growth
270	22:30:00	37	A1	0.2724	ZDBp804	DM0-growth
271	22:35:00	37	A1	0.2733	ZDBp804	DM0-growth
272	22:40:00	37	A1	0.2711	ZDBp804	DM0-growth
273	22:45:00	37	A1	0.2709	ZDBp804	DM0-growth
274	22:50:00	37	A1	0.2717	ZDBp804	DM0-growth
275	22:55:00	37	A1	0.2715	ZDBp804	DM0-growth
276	23:00:00	37	A1	0.2697	ZDBp804	DM0-growth
277	23:05:00	37	A1	0.2695	ZDBp804	DM0-growth
278	23:10:00	37	A1	0.2702	ZDBp804	DM0-growth
279	23:15:00	37	A1	0.2701	ZDBp804	DM0-growth
280	23:20:00	37	A1	0.2722	ZDBp804	DM0-growth
281	23:25:00	37	A1	0.2708	ZDBp804	DM0-growth
282	23:30:00	37	A1	0.2692	ZDBp804	DM0-growth
283	23:35:00	37	A1	0.2717	ZDBp804	DM0-growth
284	23:40:00	37	A1	0.2694	ZDBp804	DM0-growth
285	23:45:00	37	A1	0.2706	ZDBp804	DM0-growth
286	23:50:00	37	A1	0.2711	ZDBp804	DM0-growth
287	23:55:00	37	A1	0.2707	ZDBp804	DM0-growth
288	24:00:00	37	A1	0.2695	ZDBp804	DM0-growth
289	0:00:00	36	A2	0.0767	CZB152	DM0-growth
290	0:05:00	36.8	A2	0.0767	CZB152	DM0-growth
291	0:10:00	36.9	A2	0.0757	CZB152	DM0-growth
292	0:15:00	37	A2	0.0749	CZB152	DM0-growth
293	0:20:00	37	A2	0.0748	CZB152	DM0-growth
294	0:25:00	37	A2	0.0747	CZB152	DM0-growth
295	0:30:00	37	A2	0.0747	CZB152	DM0-growth
296	0:35:00	37	A2	0.0748	CZB152	DM0-growth
297	0:40:00	37	A2	0.0746	CZB152	DM0-growth
298	0:45:00	37	A2	0.0748	CZB152	DM0-growth
299	0:50:00	37	A2	0.0749	CZB152	DM0-growth
300	0:55:00	37	A2	0.0749	CZB152	DM0-growth
301	1:00:00	37	A2	0.075	CZB152	DM0-growth
302	1:05:00	37	A2	0.0749	CZB152	DM0-growth
303	1:10:00	37	A2	0.0751	CZB152	DM0-growth
304	1:15:00	37	A2	0.0749	CZB152	DM0-growth
305	1:20:00	37	A2	0.0752	CZB152	DM0-growth
306	1:25:00	37	A2	0.0753	CZB152	DM0-growth
307	1:30:00	37	A2	0.075	CZB152	DM0-growth
308	1:35:00	37	A2	0.0754	CZB152	DM0-growth
309	1:40:00	37	A2	0.0755	CZB152	DM0-growth
310	1:45:00	37	A2	0.0753	CZB152	DM0-growth
311	1:50:00	37	A2	0.0753	CZB152	DM0-growth
312	1:55:00	37	A2	0.0755	CZB152	DM0-growth
313	2:00:00	37	A2	0.0755	CZB152	DM0-growth
314	2:05:00	37	A2	0.0755	CZB152	DM0-growth
315	2:10:00	37	A2	0.0756	CZB152	DM0-growth
316	2:15:00	37	A2	0.0757	CZB152	DM0-growth
317	2:20:00	37	A2	0.0756	CZB152	DM0-growth
318	2:25:00	37	A2	0.0758	CZB152	DM0-growth
319	2:30:00	37	A2	0.0758	CZB152	DM0-growth
320	2:35:00	37	A2	0.0758	CZB152	DM0-growth
321	2:40:00	37	A2	0.0758	CZB152	DM0-growth
322	2:45:00	37	A2	0.0759	CZB152	DM0-growth
323	2:50:00	37	A2	0.0758	CZB152	DM0-growth
324	2:55:00	37	A2	0.0759	CZB152	DM0-growth
325	3:00:00	37	A2	0.0759	CZB152	DM0-growth
326	3:05:00	37	A2	0.0762	CZB152	DM0-growth
327	3:10:00	37	A2	0.076	CZB152	DM0-growth
328	3:15:00	37	A2	0.0762	CZB152	DM0-growth
329	3:20:00	37	A2	0.0761	CZB152	DM0-growth
330	3:25:00	37	A2	0.0761	CZB152	DM0-growth
331	3:30:00	37	A2	0.0763	CZB152	DM0-growth
332	3:35:00	37	A2	0.0764	CZB152	DM0-growth
333	3:40:00	37	A2	0.0762	CZB152	DM0-growth
334	3:45:00	37	A2	0.0766	CZB152	DM0-growth
335	3:50:00	37	A2	0.0765	CZB152	DM0-growth
336	3:55:00	37	A2	0.0765	CZB152	DM0-growth
337	4:00:00	37	A2	0.0768	CZB152	DM0-growth
338	4:05:00	37	A2	0.077	CZB152	DM0-growth
339	4:10:00	37	A2	0.0767	CZB152	DM0-growth
340	4:15:00	37	A2	0.0771	CZB152	DM0-growth
341	4:20:00	37	A2	0.0771	CZB152	DM0-growth
342	4:25:00	37	A2	0.077	CZB152	DM0-growth
343	4:30:00	37	A2	0.0772	CZB152	DM0-growth
344	4:35:00	37	A2	0.0773	CZB152	DM0-growth
345	4:40:00	37	A2	0.0774	CZB152	DM0-growth
346	4:45:00	37	A2	0.0776	CZB152	DM0-growth
347	4:50:00	37	A2	0.0777	CZB152	DM0-growth
348	4:55:00	37	A2	0.0777	CZB152	DM0-growth
349	5:00:00	37	A2	0.0777	CZB152	DM0-growth
350	5:05:00	37	A2	0.078	CZB152	DM0-growth
351	5:10:00	37	A2	0.0781	CZB152	DM0-growth
352	5:15:00	37	A2	0.0782	CZB152	DM0-growth
353	5:20:00	37	A2	0.0782	CZB152	DM0-growth
354	5:25:00	37	A2	0.0784	CZB152	DM0-growth
355	5:30:00	37	A2	0.0786	CZB152	DM0-growth
356	5:35:00	37	A2	0.0787	CZB152	DM0-growth
357	5:40:00	37	A2	0.0789	CZB152	DM0-growth
358	5:45:00	37	A2	0.079	CZB152	DM0-growth
359	5:50:00	37	A2	0.079	CZB152	DM0-growth
360	5:55:00	37	A2	0.0794	CZB152	DM0-growth
361	6:00:00	37	A2	0.0795	CZB152	DM0-growth
362	6:05:00	37	A2	0.0796	CZB152	DM0-growth
363	6:10:00	37	A2	0.0798	CZB152	DM0-growth
364	6:15:00	37	A2	0.08	CZB152	DM0-growth
365	6:20:00	37	A2	0.0801	CZB152	DM0-growth
366	6:25:00	37	A2	0.0803	CZB152	DM0-growth
367	6:30:00	37	A2	0.0807	CZB152	DM0-growth
368	6:35:00	37	A2	0.0807	CZB152	DM0-growth
369	6:40:00	37	A2	0.0809	CZB152	DM0-growth
370	6:45:00	37	A2	0.0812	CZB152	DM0-growth
371	6:50:00	37	A2	0.0814	CZB152	DM0-growth
372	6:55:00	37	A2	0.0817	CZB152	DM0-growth
373	7:00:00	37	A2	0.082	CZB152	DM0-growth
374	7:05:00	37	A2	0.0823	CZB152	DM0-growth
375	7:10:00	37	A2	0.0825	CZB152	DM0-growth
376	7:15:00	37	A2	0.083	CZB152	DM0-growth
377	7:20:00	37	A2	0.0831	CZB152	DM0-growth
378	7:25:00	37	A2	0.0834	CZB152	DM0-growth
379	7:30:00	37	A2	0.0837	CZB152	DM0-growth
380	7:35:00	37	A2	0.084	CZB152	DM0-growth
381	7:40:00	37	A2	0.0845	CZB152	DM0-growth
382	7:45:00	37	A2	0.0849	CZB152	DM0-growth
383	7:50:00	37	A2	0.0852	CZB152	DM0-growth
384	7:55:00	37	A2	0.0856	CZB152	DM0-growth
385	8:00:00	37	A2	0.0859	CZB152	DM0-growth
386	8:05:00	37	A2	0.0863	CZB152	DM0-growth
387	8:10:00	37	A2	0.0867	CZB152	DM0-growth
388	8:15:00	37	A2	0.0874	CZB152	DM0-growth
389	8:20:00	37	A2	0.0878	CZB152	DM0-growth
390	8:25:00	37	A2	0.0883	CZB152	DM0-growth
391	8:30:00	37	A2	0.0888	CZB152	DM0-growth
392	8:35:00	37	A2	0.0895	CZB152	DM0-growth
393	8:40:00	37	A2	0.0898	CZB152	DM0-growth
394	8:45:00	37	A2	0.0904	CZB152	DM0-growth
395	8:50:00	37	A2	0.0911	CZB152	DM0-growth
396	8:55:00	37	A2	0.0917	CZB152	DM0-growth
397	9:00:00	37	A2	0.0923	CZB152	DM0-growth
398	9:05:00	37	A2	0.0928	CZB152	DM0-growth
399	9:10:00	37	A2	0.0935	CZB152	DM0-growth
400	9:15:00	37	A2	0.0944	CZB152	DM0-growth
401	9:20:00	37	A2	0.0951	CZB152	DM0-growth
402	9:25:00	37	A2	0.0959	CZB152	DM0-growth
403	9:30:00	37	A2	0.0967	CZB152	DM0-growth
404	9:35:00	37	A2	0.0974	CZB152	DM0-growth
405	9:40:00	37	A2	0.0983	CZB152	DM0-growth
406	9:45:00	37	A2	0.0992	CZB152	DM0-growth
407	9:50:00	37	A2	0.1001	CZB152	DM0-growth
408	9:55:00	37	A2	0.101	CZB152	DM0-growth
409	10:00:00	37	A2	0.1021	CZB152	DM0-growth
410	10:05:00	37	A2	0.1031	CZB152	DM0-growth
411	10:10:00	37	A2	0.1041	CZB152	DM0-growth
412	10:15:00	37	A2	0.1055	CZB152	DM0-growth
413	10:20:00	37	A2	0.1064	CZB152	DM0-growth
414	10:25:00	37	A2	0.1078	CZB152	DM0-growth
415	10:30:00	37	A2	0.109	CZB152	DM0-growth
416	10:35:00	37	A2	0.1099	CZB152	DM0-growth
417	10:40:00	37	A2	0.1116	CZB152	DM0-growth
418	10:45:00	37	A2	0.1129	CZB152	DM0-growth
419	10:50:00	37	A2	0.1142	CZB152	DM0-growth
420	10:55:00	37	A2	0.1156	CZB152	DM0-growth
421	11:00:00	37	A2	0.1172	CZB152	DM0-growth
422	11:05:00	37	A2	0.1189	CZB152	DM0-growth
423	11:10:00	37	A2	0.1203	CZB152	DM0-growth
424	11:15:00	37	A2	0.1218	CZB152	DM0-growth
425	11:20:00	37	A2	0.1232	CZB152	DM0-growth
426	11:25:00	37	A2	0.1254	CZB152	DM0-growth
427	11:30:00	37	A2	0.1272	CZB152	DM0-growth
428	11:35:00	37	A2	0.1289	CZB152	DM0-growth
429	11:40:00	37	A2	0.1308	CZB152	DM0-growth
430	11:45:00	37	A2	0.1329	CZB152	DM0-growth
431	11:50:00	37	A2	0.1345	CZB152	DM0-growth
432	11:55:00	37	A2	0.1371	CZB152	DM0-growth
433	12:00:00	37	A2	0.1398	CZB152	DM0-growth
434	12:05:00	37	A2	0.1416	CZB152	DM0-growth
435	12:10:00	37	A2	0.144	CZB152	DM0-growth
436	12:15:00	37	A2	0.1465	CZB152	DM0-growth
437	12:20:00	37	A2	0.149	CZB152	DM0-growth
438	12:25:00	37	A2	0.1515	CZB152	DM0-growth
439	12:30:00	37	A2	0.1545	CZB152	DM0-growth
440	12:35:00	37	A2	0.1571	CZB152	DM0-growth
441	12:40:00	37	A2	0.1594	CZB152	DM0-growth
442	12:45:00	37	A2	0.1624	CZB152	DM0-growth
443	12:50:00	37	A2	0.1653	CZB152	DM0-growth
444	12:55:00	37	A2	0.1681	CZB152	DM0-growth
445	13:00:00	37	A2	0.17	CZB152	DM0-growth
446	13:05:00	37	A2	0.1726	CZB152	DM0-growth
447	13:10:00	37	A2	0.1754	CZB152	DM0-growth
448	13:15:00	37	A2	0.178	CZB152	DM0-growth
449	13:20:00	37	A2	0.1808	CZB152	DM0-growth
450	13:25:00	37	A2	0.1827	CZB152	DM0-growth
451	13:30:00	37	A2	0.1855	CZB152	DM0-growth
452	13:35:00	37	A2	0.1891	CZB152	DM0-growth
453	13:40:00	37	A2	0.1934	CZB152	DM0-growth
454	13:45:00	37	A2	0.1983	CZB152	DM0-growth
455	13:50:00	37	A2	0.2045	CZB152	DM0-growth
456	13:55:00	37	A2	0.2082	CZB152	DM0-growth
457	14:00:00	37	A2	0.2109	CZB152	DM0-growth
458	14:05:00	37	A2	0.2128	CZB152	DM0-growth
459	14:10:00	37	A2	0.2142	CZB152	DM0-growth
460	14:15:00	37	A2	0.2162	CZB152	DM0-growth
461	14:20:00	37	A2	0.2181	CZB152	DM0-growth
462	14:25:00	37	A2	0.2203	CZB152	DM0-growth
463	14:30:00	37	A2	0.222	CZB152	DM0-growth
464	14:35:00	37	A2	0.2253	CZB152	DM0-growth
465	14:40:00	37	A2	0.2281	CZB152	DM0-growth
466	14:45:00	37	A2	0.2283	CZB152	DM0-growth
467	14:50:00	37	A2	0.2272	CZB152	DM0-growth
468	14:55:00	37	A2	0.2261	CZB152	DM0-growth
469	15:00:00	37	A2	0.2241	CZB152	DM0-growth
470	15:05:00	37	A2	0.2234	CZB152	DM0-growth
471	15:10:00	37	A2	0.2221	CZB152	DM0-growth
472	15:15:00	37	A2	0.2217	CZB152	DM0-growth
473	15:20:00	37	A2	0.2211	CZB152	DM0-growth
474	15:25:00	37	A2	0.221	CZB152	DM0-growth
475	15:30:00	37	A2	0.2205	CZB152	DM0-growth
476	15:35:00	37	A2	0.2198	CZB152	DM0-growth
477	15:40:00	37	A2	0.2205	CZB152	DM0-growth
478	15:45:00	37	A2	0.2196	CZB152	DM0-growth
479	15:50:00	37	A2	0.2192	CZB152	DM0-growth
480	15:55:00	37	A2	0.2193	CZB152	DM0-growth
481	16:00:00	37	A2	0.2184	CZB152	DM0-growth
482	16:05:00	37	A2	0.2188	CZB152	DM0-growth
483	16:10:00	37	A2	0.2186	CZB152	DM0-growth
484	16:15:00	37	A2	0.2183	CZB152	DM0-growth
485	16:20:00	37	A2	0.219	CZB152	DM0-growth
486	16:25:00	37	A2	0.2178	CZB152	DM0-growth
487	16:30:00	37	A2	0.2183	CZB152	DM0-growth
488	16:35:00	37	A2	0.2179	CZB152	DM0-growth
489	16:40:00	37	A2	0.2173	CZB152	DM0-growth
490	16:45:00	37	A2	0.2168	CZB152	DM0-growth
491	16:50:00	37	A2	0.2174	CZB152	DM0-growth
492	16:55:00	37	A2	0.2175	CZB152	DM0-growth
493	17:00:00	37	A2	0.217	CZB152	DM0-growth
494	17:05:00	37	A2	0.2171	CZB152	DM0-growth
495	17:10:00	37	A2	0.2165	CZB152	DM0-growth
496	17:15:00	37	A2	0.217	CZB152	DM0-growth
497	17:20:00	37	A2	0.2168	CZB152	DM0-growth
498	17:25:00	37	A2	0.2167	CZB152	DM0-growth
499	17:30:00	37	A2	0.2164	CZB152	DM0-growth
500	17:35:00	37	A2	0.2167	CZB152	DM0-growth
501	17:40:00	37	A2	0.2163	CZB152	DM0-growth
502	17:45:00	37	A2	0.2151	CZB152	DM0-growth
503	17:50:00	37	A2	0.2158	CZB152	DM0-growth
504	17:55:00	37	A2	0.2176	CZB152	DM0-growth
505	18:00:00	37	A2	0.2192	CZB152	DM0-growth
506	18:05:00	37	A2	0.2196	CZB152	DM0-growth
507	18:10:00	37	A2	0.2155	CZB152	DM0-growth
508	18:15:00	37	A2	0.216	CZB152	DM0-growth
509	18:20:00	37	A2	0.2172	CZB152	DM0-growth
510	18:25:00	37	A2	0.2143	CZB152	DM0-growth
511	18:30:00	37	A2	0.2173	CZB152	DM0-growth
512	18:35:00	37	A2	0.2194	CZB152	DM0-growth
513	18:40:00	37	A2	0.2167	CZB152	DM0-growth
514	18:45:00	37	A2	0.2182	CZB152	DM0-growth
515	18:50:00	37	A2	0.2142	CZB152	DM0-growth
516	18:55:00	37	A2	0.2145	CZB152	DM0-growth
517	19:00:00	37	A2	0.2147	CZB152	DM0-growth
518	19:05:00	37	A2	0.2159	CZB152	DM0-growth
519	19:10:00	37	A2	0.2164	CZB152	DM0-growth
520	19:15:00	37	A2	0.2147	CZB152	DM0-growth
521	19:20:00	37	A2	0.2158	CZB152	DM0-growth
522	19:25:00	37	A2	0.2154	CZB152	DM0-growth
523	19:30:00	37	A2	0.216	CZB152	DM0-growth
524	19:35:00	37	A2	0.2159	CZB152	DM0-growth
525	19:40:00	37	A2	0.2184	CZB152	DM0-growth
526	19:45:00	37	A2	0.2163	CZB152	DM0-growth
527	19:50:00	37	A2	0.2164	CZB152	DM0-growth
528	19:55:00	37	A2	0.2158	CZB152	DM0-growth
529	20:00:00	37	A2	0.2159	CZB152	DM0-growth
530	20:05:00	37	A2	0.2168	CZB152	DM0-growth
531	20:10:00	37	A2	0.2163	CZB152	DM0-growth
532	20:15:00	37	A2	0.2182	CZB152	DM0-growth
533	20:20:00	37	A2	0.2164	CZB152	DM0-growth
534	20:25:00	37	A2	0.2168	CZB152	DM0-growth
535	20:30:00	37	A2	0.2172	CZB152	DM0-growth
536	20:35:00	37	A2	0.2171	CZB152	DM0-growth
537	20:40:00	37	A2	0.2178	CZB152	DM0-growth
538	20:45:00	37	A2	0.2178	CZB152	DM0-growth
539	20:50:00	37	A2	0.2174	CZB152	DM0-growth
540	20:55:00	37	A2	0.2172	CZB152	DM0-growth
541	21:00:00	37	A2	0.2178	CZB152	DM0-growth
542	21:05:00	37	A2	0.2178	CZB152	DM0-growth
543	21:10:00	37	A2	0.2189	CZB152	DM0-growth
544	21:15:00	37	A2	0.2189	CZB152	DM0-growth
545	21:20:00	37	A2	0.2191	CZB152	DM0-growth
546	21:25:00	37	A2	0.2182	CZB152	DM0-growth
547	21:30:00	37	A2	0.2182	CZB152	DM0-growth
548	21:35:00	37	A2	0.218	CZB152	DM0-growth
549	21:40:00	37	A2	0.2183	CZB152	DM0-growth
550	21:45:00	37	A2	0.2204	CZB152	DM0-growth
551	21:50:00	37	A2	0.2201	CZB152	DM0-growth
552	21:55:00	37	A2	0.219	CZB152	DM0-growth
553	22:00:00	37	A2	0.2207	CZB152	DM0-growth
554	22:05:00	37	A2	0.219	CZB152	DM0-growth
555	22:10:00	37	A2	0.2212	CZB152	DM0-growth
556	22:15:00	37	A2	0.2206	CZB152	DM0-growth
557	22:20:00	37	A2	0.2197	CZB152	DM0-growth
558	22:25:00	37	A2	0.2211	CZB152	DM0-growth
559	22:30:00	37	A2	0.2193	CZB152	DM0-growth
560	22:35:00	37	A2	0.2194	CZB152	DM0-growth
561	22:40:00	37	A2	0.2195	CZB152	DM0-growth
562	22:45:00	37	A2	0.2197	CZB152	DM0-growth
563	22:50:00	37	A2	0.22	CZB152	DM0-growth
564	22:55:00	37	A2	0.2197	CZB152	DM0-growth
565	23:00:00	37	A2	0.2194	CZB152	DM0-growth
566	23:05:00	37	A2	0.2187	CZB152	DM0-growth
567	23:10:00	37	A2	0.2192	CZB152	DM0-growth
568	23:15:00	37	A2	0.2191	CZB152	DM0-growth
569	23:20:00	37	A2	0.2191	CZB152	DM0-growth
570	23:25:00	37	A2	0.2208	CZB152	DM0-growth
571	23:30:00	37	A2	0.2187	CZB152	DM0-growth
572	23:35:00	37	A2	0.2194	CZB152	DM0-growth
573	23:40:00	37	A2	0.2202	CZB152	DM0-growth
574	23:45:00	37	A2	0.22	CZB152	DM0-growth
575	23:50:00	37	A2	0.2209	CZB152	DM0-growth
576	23:55:00	37	A2	0.2205	CZB152	DM0-growth
577	24:00:00	37	A2	0.22	CZB152	DM0-growth
578	0:00:00	36	A3	0.0847	ZDBp807	DM0-growth
579	0:05:00	36.8	A3	0.0858	ZDBp807	DM0-growth
580	0:10:00	36.9	A3	0.0839	ZDBp807	DM0-growth
581	0:15:00	37	A3	0.0844	ZDBp807	DM0-growth
582	0:20:00	37	A3	0.0841	ZDBp807	DM0-growth
583	0:25:00	37	A3	0.0848	ZDBp807	DM0-growth
584	0:30:00	37	A3	0.0846	ZDBp807	DM0-growth
585	0:35:00	37	A3	0.0847	ZDBp807	DM0-growth
586	0:40:00	37	A3	0.0844	ZDBp807	DM0-growth
587	0:45:00	37	A3	0.0825	ZDBp807	DM0-growth
588	0:50:00	37	A3	0.0829	ZDBp807	DM0-growth
589	0:55:00	37	A3	0.0827	ZDBp807	DM0-growth
590	1:00:00	37	A3	0.0829	ZDBp807	DM0-growth
591	1:05:00	37	A3	0.0825	ZDBp807	DM0-growth
592	1:10:00	37	A3	0.0829	ZDBp807	DM0-growth
593	1:15:00	37	A3	0.0827	ZDBp807	DM0-growth
594	1:20:00	37	A3	0.0833	ZDBp807	DM0-growth
595	1:25:00	37	A3	0.0835	ZDBp807	DM0-growth
596	1:30:00	37	A3	0.0852	ZDBp807	DM0-growth
597	1:35:00	37	A3	0.0839	ZDBp807	DM0-growth
598	1:40:00	37	A3	0.085	ZDBp807	DM0-growth
599	1:45:00	37	A3	0.0855	ZDBp807	DM0-growth
600	1:50:00	37	A3	0.0846	ZDBp807	DM0-growth
601	1:55:00	37	A3	0.0834	ZDBp807	DM0-growth
602	2:00:00	37	A3	0.0839	ZDBp807	DM0-growth
603	2:05:00	37	A3	0.0859	ZDBp807	DM0-growth
604	2:10:00	37	A3	0.0849	ZDBp807	DM0-growth
605	2:15:00	37	A3	0.0839	ZDBp807	DM0-growth
606	2:20:00	37	A3	0.085	ZDBp807	DM0-growth
607	2:25:00	37	A3	0.0864	ZDBp807	DM0-growth
608	2:30:00	37	A3	0.0856	ZDBp807	DM0-growth
609	2:35:00	37	A3	0.0844	ZDBp807	DM0-growth
610	2:40:00	37	A3	0.0866	ZDBp807	DM0-growth
611	2:45:00	37	A3	0.0854	ZDBp807	DM0-growth
612	2:50:00	37	A3	0.0862	ZDBp807	DM0-growth
613	2:55:00	37	A3	0.0848	ZDBp807	DM0-growth
614	3:00:00	37	A3	0.0865	ZDBp807	DM0-growth
615	3:05:00	37	A3	0.0874	ZDBp807	DM0-growth
616	3:10:00	37	A3	0.0871	ZDBp807	DM0-growth
617	3:15:00	37	A3	0.0868	ZDBp807	DM0-growth
618	3:20:00	37	A3	0.0869	ZDBp807	DM0-growth
619	3:25:00	37	A3	0.0857	ZDBp807	DM0-growth
620	3:30:00	37	A3	0.0876	ZDBp807	DM0-growth
621	3:35:00	37	A3	0.0863	ZDBp807	DM0-growth
622	3:40:00	37	A3	0.0883	ZDBp807	DM0-growth
623	3:45:00	37	A3	0.0867	ZDBp807	DM0-growth
624	3:50:00	37	A3	0.089	ZDBp807	DM0-growth
625	3:55:00	37	A3	0.0888	ZDBp807	DM0-growth
626	4:00:00	37	A3	0.0874	ZDBp807	DM0-growth
627	4:05:00	37	A3	0.0878	ZDBp807	DM0-growth
628	4:10:00	37	A3	0.0878	ZDBp807	DM0-growth
629	4:15:00	37	A3	0.0883	ZDBp807	DM0-growth
630	4:20:00	37	A3	0.0886	ZDBp807	DM0-growth
631	4:25:00	37	A3	0.0909	ZDBp807	DM0-growth
632	4:30:00	37	A3	0.0896	ZDBp807	DM0-growth
633	4:35:00	37	A3	0.0915	ZDBp807	DM0-growth
634	4:40:00	37	A3	0.0899	ZDBp807	DM0-growth
635	4:45:00	37	A3	0.091	ZDBp807	DM0-growth
636	4:50:00	37	A3	0.0918	ZDBp807	DM0-growth
637	4:55:00	37	A3	0.0915	ZDBp807	DM0-growth
638	5:00:00	37	A3	0.0934	ZDBp807	DM0-growth
639	5:05:00	37	A3	0.0933	ZDBp807	DM0-growth
640	5:10:00	37	A3	0.093	ZDBp807	DM0-growth
641	5:15:00	37	A3	0.0946	ZDBp807	DM0-growth
642	5:20:00	37	A3	0.0951	ZDBp807	DM0-growth
643	5:25:00	37	A3	0.0953	ZDBp807	DM0-growth
644	5:30:00	37	A3	0.0955	ZDBp807	DM0-growth
645	5:35:00	37	A3	0.0965	ZDBp807	DM0-growth
646	5:40:00	37	A3	0.0977	ZDBp807	DM0-growth
647	5:45:00	37	A3	0.0991	ZDBp807	DM0-growth
648	5:50:00	37	A3	0.0989	ZDBp807	DM0-growth
649	5:55:00	37	A3	0.0997	ZDBp807	DM0-growth
650	6:00:00	37	A3	0.1011	ZDBp807	DM0-growth
651	6:05:00	37	A3	0.1023	ZDBp807	DM0-growth
652	6:10:00	37	A3	0.1037	ZDBp807	DM0-growth
653	6:15:00	37	A3	0.104	ZDBp807	DM0-growth
654	6:20:00	37	A3	0.1061	ZDBp807	DM0-growth
655	6:25:00	37	A3	0.1074	ZDBp807	DM0-growth
656	6:30:00	37	A3	0.1074	ZDBp807	DM0-growth
657	6:35:00	37	A3	0.1108	ZDBp807	DM0-growth
658	6:40:00	37	A3	0.1107	ZDBp807	DM0-growth
659	6:45:00	37	A3	0.1127	ZDBp807	DM0-growth
660	6:50:00	37	A3	0.1155	ZDBp807	DM0-growth
661	6:55:00	37	A3	0.1171	ZDBp807	DM0-growth
662	7:00:00	37	A3	0.1191	ZDBp807	DM0-growth
663	7:05:00	37	A3	0.1189	ZDBp807	DM0-growth
664	7:10:00	37	A3	0.121	ZDBp807	DM0-growth
665	7:15:00	37	A3	0.1232	ZDBp807	DM0-growth
666	7:20:00	37	A3	0.1259	ZDBp807	DM0-growth
667	7:25:00	37	A3	0.1282	ZDBp807	DM0-growth
668	7:30:00	37	A3	0.1306	ZDBp807	DM0-growth
669	7:35:00	37	A3	0.1343	ZDBp807	DM0-growth
670	7:40:00	37	A3	0.1371	ZDBp807	DM0-growth
671	7:45:00	37	A3	0.1389	ZDBp807	DM0-growth
672	7:50:00	37	A3	0.1403	ZDBp807	DM0-growth
673	7:55:00	37	A3	0.1439	ZDBp807	DM0-growth
674	8:00:00	37	A3	0.1469	ZDBp807	DM0-growth
675	8:05:00	37	A3	0.1479	ZDBp807	DM0-growth
676	8:10:00	37	A3	0.1524	ZDBp807	DM0-growth
677	8:15:00	37	A3	0.1533	ZDBp807	DM0-growth
678	8:20:00	37	A3	0.1583	ZDBp807	DM0-growth
679	8:25:00	37	A3	0.1602	ZDBp807	DM0-growth
680	8:30:00	37	A3	0.1622	ZDBp807	DM0-growth
681	8:35:00	37	A3	0.165	ZDBp807	DM0-growth
682	8:40:00	37	A3	0.1693	ZDBp807	DM0-growth
683	8:45:00	37	A3	0.1704	ZDBp807	DM0-growth
684	8:50:00	37	A3	0.1739	ZDBp807	DM0-growth
685	8:55:00	37	A3	0.1764	ZDBp807	DM0-growth
686	9:00:00	37	A3	0.1804	ZDBp807	DM0-growth
687	9:05:00	37	A3	0.1815	ZDBp807	DM0-growth
688	9:10:00	37	A3	0.1846	ZDBp807	DM0-growth
689	9:15:00	37	A3	0.1872	ZDBp807	DM0-growth
690	9:20:00	37	A3	0.1904	ZDBp807	DM0-growth
691	9:25:00	37	A3	0.1949	ZDBp807	DM0-growth
692	9:30:00	37	A3	0.1964	ZDBp807	DM0-growth
693	9:35:00	37	A3	0.2038	ZDBp807	DM0-growth
694	9:40:00	37	A3	0.2082	ZDBp807	DM0-growth
695	9:45:00	37	A3	0.2156	ZDBp807	DM0-growth
696	9:50:00	37	A3	0.2193	ZDBp807	DM0-growth
697	9:55:00	37	A3	0.2227	ZDBp807	DM0-growth
698	10:00:00	37	A3	0.2269	ZDBp807	DM0-growth
699	10:05:00	37	A3	0.2269	ZDBp807	DM0-growth
700	10:10:00	37	A3	0.231	ZDBp807	DM0-growth
701	10:15:00	37	A3	0.2326	ZDBp807	DM0-growth
702	10:20:00	37	A3	0.2378	ZDBp807	DM0-growth
703	10:25:00	37	A3	0.2416	ZDBp807	DM0-growth
704	10:30:00	37	A3	0.2418	ZDBp807	DM0-growth
705	10:35:00	37	A3	0.2416	ZDBp807	DM0-growth
706	10:40:00	37	A3	0.2431	ZDBp807	DM0-growth
707	10:45:00	37	A3	0.2402	ZDBp807	DM0-growth
708	10:50:00	37	A3	0.2407	ZDBp807	DM0-growth
709	10:55:00	37	A3	0.2423	ZDBp807	DM0-growth
710	11:00:00	37	A3	0.2411	ZDBp807	DM0-growth
711	11:05:00	37	A3	0.2431	ZDBp807	DM0-growth
712	11:10:00	37	A3	0.243	ZDBp807	DM0-growth
713	11:15:00	37	A3	0.2416	ZDBp807	DM0-growth
714	11:20:00	37	A3	0.2428	ZDBp807	DM0-growth
715	11:25:00	37	A3	0.2424	ZDBp807	DM0-growth
716	11:30:00	37	A3	0.2418	ZDBp807	DM0-growth
717	11:35:00	37	A3	0.2425	ZDBp807	DM0-growth
718	11:40:00	37	A3	0.2413	ZDBp807	DM0-growth
719	11:45:00	37	A3	0.2419	ZDBp807	DM0-growth
720	11:50:00	37	A3	0.2415	ZDBp807	DM0-growth
721	11:55:00	37	A3	0.2403	ZDBp807	DM0-growth
722	12:00:00	37	A3	0.2426	ZDBp807	DM0-growth
723	12:05:00	37	A3	0.2409	ZDBp807	DM0-growth
724	12:10:00	37	A3	0.2405	ZDBp807	DM0-growth
725	12:15:00	37	A3	0.2406	ZDBp807	DM0-growth
726	12:20:00	37	A3	0.2403	ZDBp807	DM0-growth
727	12:25:00	37	A3	0.2406	ZDBp807	DM0-growth
728	12:30:00	37	A3	0.2407	ZDBp807	DM0-growth
729	12:35:00	37	A3	0.2413	ZDBp807	DM0-growth
730	12:40:00	37	A3	0.2394	ZDBp807	DM0-growth
731	12:45:00	37	A3	0.2384	ZDBp807	DM0-growth
732	12:50:00	37	A3	0.239	ZDBp807	DM0-growth
733	12:55:00	37	A3	0.2379	ZDBp807	DM0-growth
734	13:00:00	37	A3	0.237	ZDBp807	DM0-growth
735	13:05:00	37	A3	0.2377	ZDBp807	DM0-growth
736	13:10:00	37	A3	0.2369	ZDBp807	DM0-growth
737	13:15:00	37	A3	0.2363	ZDBp807	DM0-growth
738	13:20:00	37	A3	0.2361	ZDBp807	DM0-growth
739	13:25:00	37	A3	0.2342	ZDBp807	DM0-growth
740	13:30:00	37	A3	0.2339	ZDBp807	DM0-growth
741	13:35:00	37	A3	0.2341	ZDBp807	DM0-growth
742	13:40:00	37	A3	0.233	ZDBp807	DM0-growth
743	13:45:00	37	A3	0.2322	ZDBp807	DM0-growth
744	13:50:00	37	A3	0.2325	ZDBp807	DM0-growth
745	13:55:00	37	A3	0.2328	ZDBp807	DM0-growth
746	14:00:00	37	A3	0.2324	ZDBp807	DM0-growth
747	14:05:00	37	A3	0.2317	ZDBp807	DM0-growth
748	14:10:00	37	A3	0.2324	ZDBp807	DM0-growth
749	14:15:00	37	A3	0.2312	ZDBp807	DM0-growth
750	14:20:00	37	A3	0.2323	ZDBp807	DM0-growth
751	14:25:00	37	A3	0.2323	ZDBp807	DM0-growth
752	14:30:00	37	A3	0.2329	ZDBp807	DM0-growth
753	14:35:00	37	A3	0.2328	ZDBp807	DM0-growth
754	14:40:00	37	A3	0.2344	ZDBp807	DM0-growth
755	14:45:00	37	A3	0.2349	ZDBp807	DM0-growth
756	14:50:00	37	A3	0.2345	ZDBp807	DM0-growth
757	14:55:00	37	A3	0.2341	ZDBp807	DM0-growth
758	15:00:00	37	A3	0.234	ZDBp807	DM0-growth
759	15:05:00	37	A3	0.2342	ZDBp807	DM0-growth
760	15:10:00	37	A3	0.2353	ZDBp807	DM0-growth
761	15:15:00	37	A3	0.2347	ZDBp807	DM0-growth
762	15:20:00	37	A3	0.2361	ZDBp807	DM0-growth
763	15:25:00	37	A3	0.2357	ZDBp807	DM0-growth
764	15:30:00	37	A3	0.2354	ZDBp807	DM0-growth
765	15:35:00	37	A3	0.241	ZDBp807	DM0-growth
766	15:40:00	37	A3	0.236	ZDBp807	DM0-growth
767	15:45:00	37	A3	0.2378	ZDBp807	DM0-growth
768	15:50:00	37	A3	0.2488	ZDBp807	DM0-growth
769	15:55:00	37	A3	0.2427	ZDBp807	DM0-growth
770	16:00:00	37	A3	0.2416	ZDBp807	DM0-growth
771	16:05:00	37	A3	0.2523	ZDBp807	DM0-growth
772	16:10:00	37	A3	0.2443	ZDBp807	DM0-growth
773	16:15:00	37	A3	0.241	ZDBp807	DM0-growth
774	16:20:00	37	A3	0.2397	ZDBp807	DM0-growth
775	16:25:00	37	A3	0.2446	ZDBp807	DM0-growth
776	16:30:00	37	A3	0.2436	ZDBp807	DM0-growth
777	16:35:00	37	A3	0.2431	ZDBp807	DM0-growth
778	16:40:00	37	A3	0.2506	ZDBp807	DM0-growth
779	16:45:00	37	A3	0.249	ZDBp807	DM0-growth
780	16:50:00	37	A3	0.2476	ZDBp807	DM0-growth
781	16:55:00	37	A3	0.2459	ZDBp807	DM0-growth
782	17:00:00	37	A3	0.2445	ZDBp807	DM0-growth
783	17:05:00	37	A3	0.2529	ZDBp807	DM0-growth
784	17:10:00	37	A3	0.2465	ZDBp807	DM0-growth
785	17:15:00	37	A3	0.2474	ZDBp807	DM0-growth
786	17:20:00	37	A3	0.2483	ZDBp807	DM0-growth
787	17:25:00	37	A3	0.2484	ZDBp807	DM0-growth
788	17:30:00	37	A3	0.246	ZDBp807	DM0-growth
789	17:35:00	37	A3	0.2487	ZDBp807	DM0-growth
790	17:40:00	37	A3	0.248	ZDBp807	DM0-growth
791	17:45:00	37	A3	0.2464	ZDBp807	DM0-growth
792	17:50:00	37	A3	0.2488	ZDBp807	DM0-growth
793	17:55:00	37	A3	0.2503	ZDBp807	DM0-growth
794	18:00:00	37	A3	0.2496	ZDBp807	DM0-growth
795	18:05:00	37	A3	0.2499	ZDBp807	DM0-growth
796	18:10:00	37	A3	0.2495	ZDBp807	DM0-growth
797	18:15:00	37	A3	0.251	ZDBp807	DM0-growth
798	18:20:00	37	A3	0.2514	ZDBp807	DM0-growth
799	18:25:00	37	A3	0.2507	ZDBp807	DM0-growth
800	18:30:00	37	A3	0.2504	ZDBp807	DM0-growth
801	18:35:00	37	A3	0.2525	ZDBp807	DM0-growth
802	18:40:00	37	A3	0.2519	ZDBp807	DM0-growth
803	18:45:00	37	A3	0.2515	ZDBp807	DM0-growth
804	18:50:00	37	A3	0.2525	ZDBp807	DM0-growth
805	18:55:00	37	A3	0.2527	ZDBp807	DM0-growth
806	19:00:00	37	A3	0.2525	ZDBp807	DM0-growth
807	19:05:00	37	A3	0.2519	ZDBp807	DM0-growth
808	19:10:00	37	A3	0.2527	ZDBp807	DM0-growth
809	19:15:00	37	A3	0.2521	ZDBp807	DM0-growth
810	19:20:00	37	A3	0.253	ZDBp807	DM0-growth
811	19:25:00	37	A3	0.2529	ZDBp807	DM0-growth
812	19:30:00	37	A3	0.2542	ZDBp807	DM0-growth
813	19:35:00	37	A3	0.2545	ZDBp807	DM0-growth
814	19:40:00	37	A3	0.255	ZDBp807	DM0-growth
815	19:45:00	37	A3	0.2554	ZDBp807	DM0-growth
816	19:50:00	37	A3	0.2575	ZDBp807	DM0-growth
817	19:55:00	37	A3	0.2565	ZDBp807	DM0-growth
818	20:00:00	37	A3	0.2562	ZDBp807	DM0-growth
819	20:05:00	37	A3	0.2559	ZDBp807	DM0-growth
820	20:10:00	37	A3	0.2575	ZDBp807	DM0-growth
821	20:15:00	37	A3	0.2564	ZDBp807	DM0-growth
822	20:20:00	37	A3	0.2569	ZDBp807	DM0-growth
823	20:25:00	37	A3	0.2576	ZDBp807	DM0-growth
824	20:30:00	37	A3	0.2572	ZDBp807	DM0-growth
825	20:35:00	37	A3	0.2584	ZDBp807	DM0-growth
826	20:40:00	37	A3	0.2576	ZDBp807	DM0-growth
827	20:45:00	37	A3	0.2581	ZDBp807	DM0-growth
828	20:50:00	37	A3	0.2577	ZDBp807	DM0-growth
829	20:55:00	37	A3	0.2592	ZDBp807	DM0-growth
830	21:00:00	37	A3	0.2588	ZDBp807	DM0-growth
831	21:05:00	37	A3	0.2578	ZDBp807	DM0-growth
832	21:10:00	37	A3	0.26	ZDBp807	DM0-growth
833	21:15:00	37	A3	0.2602	ZDBp807	DM0-growth
834	21:20:00	37	A3	0.2596	ZDBp807	DM0-growth
835	21:25:00	37	A3	0.2592	ZDBp807	DM0-growth
836	21:30:00	37	A3	0.2602	ZDBp807	DM0-growth
837	21:35:00	37	A3	0.2591	ZDBp807	DM0-growth
838	21:40:00	37	A3	0.2605	ZDBp807	DM0-growth
839	21:45:00	37	A3	0.2606	ZDBp807	DM0-growth
840	21:50:00	37	A3	0.2605	ZDBp807	DM0-growth
841	21:55:00	37	A3	0.2627	ZDBp807	DM0-growth
842	22:00:00	37	A3	0.2604	ZDBp807	DM0-growth
843	22:05:00	37	A3	0.2627	ZDBp807	DM0-growth
844	22:10:00	37	A3	0.2645	ZDBp807	DM0-growth
845	22:15:00	37	A3	0.2635	ZDBp807	DM0-growth
846	22:20:00	37	A3	0.2629	ZDBp807	DM0-growth
847	22:25:00	37	A3	0.262	ZDBp807	DM0-growth
848	22:30:00	37	A3	0.2625	ZDBp807	DM0-growth
849	22:35:00	37	A3	0.2624	ZDBp807	DM0-growth
850	22:40:00	37	A3	0.263	ZDBp807	DM0-growth
851	22:45:00	37	A3	0.2645	ZDBp807	DM0-growth
852	22:50:00	37	A3	0.2641	ZDBp807	DM0-growth
853	22:55:00	37	A3	0.2641	ZDBp807	DM0-growth
854	23:00:00	37	A3	0.264	ZDBp807	DM0-growth
855	23:05:00	37	A3	0.2642	ZDBp807	DM0-growth
856	23:10:00	37	A3	0.264	ZDBp807	DM0-growth
857	23:15:00	37	A3	0.2656	ZDBp807	DM0-growth
858	23:20:00	37	A3	0.2644	ZDBp807	DM0-growth
859	23:25:00	37	A3	0.265	ZDBp807	DM0-growth
860	23:30:00	37	A3	0.2645	ZDBp807	DM0-growth
861	23:35:00	37	A3	0.2641	ZDBp807	DM0-growth
862	23:40:00	37	A3	0.2647	ZDBp807	DM0-growth
863	23:45:00	37	A3	0.2646	ZDBp807	DM0-growth
864	23:50:00	37	A3	0.2653	ZDBp807	DM0-growth
865	23:55:00	37	A3	0.2654	ZDBp807	DM0-growth
866	24:00:00	37	A3	0.2657	ZDBp807	DM0-growth
867	0:00:00	36	A4	0.0816	ZDBp799	DM0-growth
868	0:05:00	36.8	A4	0.0814	ZDBp799	DM0-growth
869	0:10:00	36.9	A4	0.0805	ZDBp799	DM0-growth
870	0:15:00	37	A4	0.0797	ZDBp799	DM0-growth
871	0:20:00	37	A4	0.0793	ZDBp799	DM0-growth
872	0:25:00	37	A4	0.0791	ZDBp799	DM0-growth
873	0:30:00	37	A4	0.0793	ZDBp799	DM0-growth
874	0:35:00	37	A4	0.0791	ZDBp799	DM0-growth
875	0:40:00	37	A4	0.0789	ZDBp799	DM0-growth
876	0:45:00	37	A4	0.0793	ZDBp799	DM0-growth
877	0:50:00	37	A4	0.079	ZDBp799	DM0-growth
878	0:55:00	37	A4	0.0794	ZDBp799	DM0-growth
879	1:00:00	37	A4	0.0797	ZDBp799	DM0-growth
880	1:05:00	37	A4	0.0794	ZDBp799	DM0-growth
881	1:10:00	37	A4	0.0797	ZDBp799	DM0-growth
882	1:15:00	37	A4	0.0797	ZDBp799	DM0-growth
883	1:20:00	37	A4	0.0802	ZDBp799	DM0-growth
884	1:25:00	37	A4	0.0803	ZDBp799	DM0-growth
885	1:30:00	37	A4	0.0807	ZDBp799	DM0-growth
886	1:35:00	37	A4	0.0808	ZDBp799	DM0-growth
887	1:40:00	37	A4	0.0809	ZDBp799	DM0-growth
888	1:45:00	37	A4	0.081	ZDBp799	DM0-growth
889	1:50:00	37	A4	0.0809	ZDBp799	DM0-growth
890	1:55:00	37	A4	0.0813	ZDBp799	DM0-growth
891	2:00:00	37	A4	0.0811	ZDBp799	DM0-growth
892	2:05:00	37	A4	0.0815	ZDBp799	DM0-growth
893	2:10:00	37	A4	0.0818	ZDBp799	DM0-growth
894	2:15:00	37	A4	0.0819	ZDBp799	DM0-growth
895	2:20:00	37	A4	0.0822	ZDBp799	DM0-growth
896	2:25:00	37	A4	0.0821	ZDBp799	DM0-growth
897	2:30:00	37	A4	0.0823	ZDBp799	DM0-growth
898	2:35:00	37	A4	0.0825	ZDBp799	DM0-growth
899	2:40:00	37	A4	0.083	ZDBp799	DM0-growth
900	2:45:00	37	A4	0.0834	ZDBp799	DM0-growth
901	2:50:00	37	A4	0.0833	ZDBp799	DM0-growth
902	2:55:00	37	A4	0.0835	ZDBp799	DM0-growth
903	3:00:00	37	A4	0.0839	ZDBp799	DM0-growth
904	3:05:00	37	A4	0.0842	ZDBp799	DM0-growth
905	3:10:00	37	A4	0.0845	ZDBp799	DM0-growth
906	3:15:00	37	A4	0.0851	ZDBp799	DM0-growth
907	3:20:00	37	A4	0.0857	ZDBp799	DM0-growth
908	3:25:00	37	A4	0.0859	ZDBp799	DM0-growth
909	3:30:00	37	A4	0.0866	ZDBp799	DM0-growth
910	3:35:00	37	A4	0.0873	ZDBp799	DM0-growth
911	3:40:00	37	A4	0.0877	ZDBp799	DM0-growth
912	3:45:00	37	A4	0.0884	ZDBp799	DM0-growth
913	3:50:00	37	A4	0.0891	ZDBp799	DM0-growth
914	3:55:00	37	A4	0.0896	ZDBp799	DM0-growth
915	4:00:00	37	A4	0.0907	ZDBp799	DM0-growth
916	4:05:00	37	A4	0.0914	ZDBp799	DM0-growth
917	4:10:00	37	A4	0.0918	ZDBp799	DM0-growth
918	4:15:00	37	A4	0.093	ZDBp799	DM0-growth
919	4:20:00	37	A4	0.0935	ZDBp799	DM0-growth
920	4:25:00	37	A4	0.0947	ZDBp799	DM0-growth
921	4:30:00	37	A4	0.0956	ZDBp799	DM0-growth
922	4:35:00	37	A4	0.0972	ZDBp799	DM0-growth
923	4:40:00	37	A4	0.0979	ZDBp799	DM0-growth
924	4:45:00	37	A4	0.0994	ZDBp799	DM0-growth
925	4:50:00	37	A4	0.101	ZDBp799	DM0-growth
926	4:55:00	37	A4	0.1019	ZDBp799	DM0-growth
927	5:00:00	37	A4	0.1036	ZDBp799	DM0-growth
928	5:05:00	37	A4	0.105	ZDBp799	DM0-growth
929	5:10:00	37	A4	0.1069	ZDBp799	DM0-growth
930	5:15:00	37	A4	0.1088	ZDBp799	DM0-growth
931	5:20:00	37	A4	0.1107	ZDBp799	DM0-growth
932	5:25:00	37	A4	0.1127	ZDBp799	DM0-growth
933	5:30:00	37	A4	0.1154	ZDBp799	DM0-growth
934	5:35:00	37	A4	0.1173	ZDBp799	DM0-growth
935	5:40:00	37	A4	0.1201	ZDBp799	DM0-growth
936	5:45:00	37	A4	0.123	ZDBp799	DM0-growth
937	5:50:00	37	A4	0.1254	ZDBp799	DM0-growth
938	5:55:00	37	A4	0.1282	ZDBp799	DM0-growth
939	6:00:00	37	A4	0.1305	ZDBp799	DM0-growth
940	6:05:00	37	A4	0.1342	ZDBp799	DM0-growth
941	6:10:00	37	A4	0.1371	ZDBp799	DM0-growth
942	6:15:00	37	A4	0.1407	ZDBp799	DM0-growth
943	6:20:00	37	A4	0.1474	ZDBp799	DM0-growth
944	6:25:00	37	A4	0.1463	ZDBp799	DM0-growth
945	6:30:00	37	A4	0.1498	ZDBp799	DM0-growth
946	6:35:00	37	A4	0.1535	ZDBp799	DM0-growth
947	6:40:00	37	A4	0.1596	ZDBp799	DM0-growth
948	6:45:00	37	A4	0.1705	ZDBp799	DM0-growth
949	6:50:00	37	A4	0.17	ZDBp799	DM0-growth
950	6:55:00	37	A4	0.18	ZDBp799	DM0-growth
951	7:00:00	37	A4	0.1782	ZDBp799	DM0-growth
952	7:05:00	37	A4	0.1732	ZDBp799	DM0-growth
953	7:10:00	37	A4	0.1785	ZDBp799	DM0-growth
954	7:15:00	37	A4	0.1814	ZDBp799	DM0-growth
955	7:20:00	37	A4	0.1814	ZDBp799	DM0-growth
956	7:25:00	37	A4	0.1839	ZDBp799	DM0-growth
957	7:30:00	37	A4	0.1858	ZDBp799	DM0-growth
958	7:35:00	37	A4	0.1893	ZDBp799	DM0-growth
959	7:40:00	37	A4	0.1914	ZDBp799	DM0-growth
960	7:45:00	37	A4	0.1952	ZDBp799	DM0-growth
961	7:50:00	37	A4	0.1988	ZDBp799	DM0-growth
962	7:55:00	37	A4	0.2007	ZDBp799	DM0-growth
963	8:00:00	37	A4	0.2054	ZDBp799	DM0-growth
964	8:05:00	37	A4	0.2063	ZDBp799	DM0-growth
965	8:10:00	37	A4	0.2097	ZDBp799	DM0-growth
966	8:15:00	37	A4	0.2174	ZDBp799	DM0-growth
967	8:20:00	37	A4	0.2175	ZDBp799	DM0-growth
968	8:25:00	37	A4	0.2228	ZDBp799	DM0-growth
969	8:30:00	37	A4	0.226	ZDBp799	DM0-growth
970	8:35:00	37	A4	0.2346	ZDBp799	DM0-growth
971	8:40:00	37	A4	0.2453	ZDBp799	DM0-growth
972	8:45:00	37	A4	0.2463	ZDBp799	DM0-growth
973	8:50:00	37	A4	0.2475	ZDBp799	DM0-growth
974	8:55:00	37	A4	0.2498	ZDBp799	DM0-growth
975	9:00:00	37	A4	0.2521	ZDBp799	DM0-growth
976	9:05:00	37	A4	0.253	ZDBp799	DM0-growth
977	9:10:00	37	A4	0.2541	ZDBp799	DM0-growth
978	9:15:00	37	A4	0.2538	ZDBp799	DM0-growth
979	9:20:00	37	A4	0.2542	ZDBp799	DM0-growth
980	9:25:00	37	A4	0.2537	ZDBp799	DM0-growth
981	9:30:00	37	A4	0.2547	ZDBp799	DM0-growth
982	9:35:00	37	A4	0.2542	ZDBp799	DM0-growth
983	9:40:00	37	A4	0.255	ZDBp799	DM0-growth
984	9:45:00	37	A4	0.2562	ZDBp799	DM0-growth
985	9:50:00	37	A4	0.2564	ZDBp799	DM0-growth
986	9:55:00	37	A4	0.2547	ZDBp799	DM0-growth
987	10:00:00	37	A4	0.2548	ZDBp799	DM0-growth
988	10:05:00	37	A4	0.2545	ZDBp799	DM0-growth
989	10:10:00	37	A4	0.2547	ZDBp799	DM0-growth
990	10:15:00	37	A4	0.254	ZDBp799	DM0-growth
991	10:20:00	37	A4	0.2553	ZDBp799	DM0-growth
992	10:25:00	37	A4	0.2553	ZDBp799	DM0-growth
993	10:30:00	37	A4	0.2555	ZDBp799	DM0-growth
994	10:35:00	37	A4	0.2552	ZDBp799	DM0-growth
995	10:40:00	37	A4	0.2551	ZDBp799	DM0-growth
996	10:45:00	37	A4	0.2555	ZDBp799	DM0-growth
997	10:50:00	37	A4	0.2557	ZDBp799	DM0-growth
998	10:55:00	37	A4	0.2557	ZDBp799	DM0-growth
999	11:00:00	37	A4	0.2555	ZDBp799	DM0-growth
1000	11:05:00	37	A4	0.2555	ZDBp799	DM0-growth
1001	11:10:00	37	A4	0.2554	ZDBp799	DM0-growth
1002	11:15:00	37	A4	0.2557	ZDBp799	DM0-growth
1003	11:20:00	37	A4	0.255	ZDBp799	DM0-growth
1004	11:25:00	37	A4	0.2548	ZDBp799	DM0-growth
1005	11:30:00	37	A4	0.2542	ZDBp799	DM0-growth
1006	11:35:00	37	A4	0.2543	ZDBp799	DM0-growth
1007	11:40:00	37	A4	0.2548	ZDBp799	DM0-growth
1008	11:45:00	37	A4	0.2543	ZDBp799	DM0-growth
1009	11:50:00	37	A4	0.2543	ZDBp799	DM0-growth
1010	11:55:00	37	A4	0.2547	ZDBp799	DM0-growth
1011	12:00:00	37	A4	0.254	ZDBp799	DM0-growth
1012	12:05:00	37	A4	0.2538	ZDBp799	DM0-growth
1013	12:10:00	37	A4	0.2538	ZDBp799	DM0-growth
1014	12:15:00	37	A4	0.2534	ZDBp799	DM0-growth
1015	12:20:00	37	A4	0.2532	ZDBp799	DM0-growth
1016	12:25:00	37	A4	0.2531	ZDBp799	DM0-growth
1017	12:30:00	37	A4	0.2531	ZDBp799	DM0-growth
1018	12:35:00	37	A4	0.2526	ZDBp799	DM0-growth
1019	12:40:00	37	A4	0.2528	ZDBp799	DM0-growth
1020	12:45:00	37	A4	0.2532	ZDBp799	DM0-growth
1021	12:50:00	37	A4	0.2527	ZDBp799	DM0-growth
1022	12:55:00	37	A4	0.2532	ZDBp799	DM0-growth
1023	13:00:00	37	A4	0.2532	ZDBp799	DM0-growth
1024	13:05:00	37	A4	0.2525	ZDBp799	DM0-growth
1025	13:10:00	37	A4	0.2524	ZDBp799	DM0-growth
1026	13:15:00	37	A4	0.2517	ZDBp799	DM0-growth
1027	13:20:00	37	A4	0.252	ZDBp799	DM0-growth
1028	13:25:00	37	A4	0.2518	ZDBp799	DM0-growth
1029	13:30:00	37	A4	0.2537	ZDBp799	DM0-growth
1030	13:35:00	37	A4	0.2519	ZDBp799	DM0-growth
1031	13:40:00	37	A4	0.2527	ZDBp799	DM0-growth
1032	13:45:00	37	A4	0.2522	ZDBp799	DM0-growth
1033	13:50:00	37	A4	0.2521	ZDBp799	DM0-growth
1034	13:55:00	37	A4	0.2519	ZDBp799	DM0-growth
1035	14:00:00	37	A4	0.2519	ZDBp799	DM0-growth
1036	14:05:00	37	A4	0.2519	ZDBp799	DM0-growth
1037	14:10:00	37	A4	0.252	ZDBp799	DM0-growth
1038	14:15:00	37	A4	0.2515	ZDBp799	DM0-growth
1039	14:20:00	37	A4	0.2519	ZDBp799	DM0-growth
1040	14:25:00	37	A4	0.2515	ZDBp799	DM0-growth
1041	14:30:00	37	A4	0.2518	ZDBp799	DM0-growth
1042	14:35:00	37	A4	0.2517	ZDBp799	DM0-growth
1043	14:40:00	37	A4	0.2509	ZDBp799	DM0-growth
1044	14:45:00	37	A4	0.2518	ZDBp799	DM0-growth
1045	14:50:00	37	A4	0.2516	ZDBp799	DM0-growth
1046	14:55:00	37	A4	0.2516	ZDBp799	DM0-growth
1047	15:00:00	37	A4	0.2511	ZDBp799	DM0-growth
1048	15:05:00	37	A4	0.252	ZDBp799	DM0-growth
1049	15:10:00	37	A4	0.2514	ZDBp799	DM0-growth
1050	15:15:00	37	A4	0.2511	ZDBp799	DM0-growth
1051	15:20:00	37	A4	0.2509	ZDBp799	DM0-growth
1052	15:25:00	37	A4	0.2512	ZDBp799	DM0-growth
1053	15:30:00	37	A4	0.251	ZDBp799	DM0-growth
1054	15:35:00	37	A4	0.2501	ZDBp799	DM0-growth
1055	15:40:00	37	A4	0.251	ZDBp799	DM0-growth
1056	15:45:00	37	A4	0.2507	ZDBp799	DM0-growth
1057	15:50:00	37	A4	0.2506	ZDBp799	DM0-growth
1058	15:55:00	37	A4	0.2512	ZDBp799	DM0-growth
1059	16:00:00	37	A4	0.251	ZDBp799	DM0-growth
1060	16:05:00	37	A4	0.2508	ZDBp799	DM0-growth
1061	16:10:00	37	A4	0.2507	ZDBp799	DM0-growth
1062	16:15:00	37	A4	0.2508	ZDBp799	DM0-growth
1063	16:20:00	37	A4	0.2504	ZDBp799	DM0-growth
1064	16:25:00	37	A4	0.2504	ZDBp799	DM0-growth
1065	16:30:00	37	A4	0.2502	ZDBp799	DM0-growth
1066	16:35:00	37	A4	0.2505	ZDBp799	DM0-growth
1067	16:40:00	37	A4	0.2495	ZDBp799	DM0-growth
1068	16:45:00	37	A4	0.2495	ZDBp799	DM0-growth
1069	16:50:00	37	A4	0.2501	ZDBp799	DM0-growth
1070	16:55:00	37	A4	0.2497	ZDBp799	DM0-growth
1071	17:00:00	37	A4	0.2501	ZDBp799	DM0-growth
1072	17:05:00	37	A4	0.2496	ZDBp799	DM0-growth
1073	17:10:00	37	A4	0.2488	ZDBp799	DM0-growth
1074	17:15:00	37	A4	0.2482	ZDBp799	DM0-growth
1075	17:20:00	37	A4	0.2492	ZDBp799	DM0-growth
1076	17:25:00	37	A4	0.249	ZDBp799	DM0-growth
1077	17:30:00	37	A4	0.2486	ZDBp799	DM0-growth
1078	17:35:00	37	A4	0.2489	ZDBp799	DM0-growth
1079	17:40:00	37	A4	0.2475	ZDBp799	DM0-growth
1080	17:45:00	37	A4	0.2485	ZDBp799	DM0-growth
1081	17:50:00	37	A4	0.2485	ZDBp799	DM0-growth
1082	17:55:00	37	A4	0.2474	ZDBp799	DM0-growth
1083	18:00:00	37	A4	0.2473	ZDBp799	DM0-growth
1084	18:05:00	37	A4	0.2481	ZDBp799	DM0-growth
1085	18:10:00	37	A4	0.2477	ZDBp799	DM0-growth
1086	18:15:00	37	A4	0.2462	ZDBp799	DM0-growth
1087	18:20:00	37	A4	0.247	ZDBp799	DM0-growth
1088	18:25:00	37	A4	0.2472	ZDBp799	DM0-growth
1089	18:30:00	37	A4	0.2467	ZDBp799	DM0-growth
1090	18:35:00	37	A4	0.2474	ZDBp799	DM0-growth
1091	18:40:00	37	A4	0.2456	ZDBp799	DM0-growth
1092	18:45:00	37	A4	0.2468	ZDBp799	DM0-growth
1093	18:50:00	37	A4	0.246	ZDBp799	DM0-growth
1094	18:55:00	37	A4	0.2462	ZDBp799	DM0-growth
1095	19:00:00	37	A4	0.2467	ZDBp799	DM0-growth
1096	19:05:00	37	A4	0.2454	ZDBp799	DM0-growth
1097	19:10:00	37	A4	0.2462	ZDBp799	DM0-growth
1098	19:15:00	37	A4	0.2455	ZDBp799	DM0-growth
1099	19:20:00	37	A4	0.2455	ZDBp799	DM0-growth
1100	19:25:00	37	A4	0.2454	ZDBp799	DM0-growth
1101	19:30:00	37	A4	0.2453	ZDBp799	DM0-growth
1102	19:35:00	37	A4	0.2456	ZDBp799	DM0-growth
1103	19:40:00	37	A4	0.2449	ZDBp799	DM0-growth
1104	19:45:00	37	A4	0.2452	ZDBp799	DM0-growth
1105	19:50:00	37	A4	0.2452	ZDBp799	DM0-growth
1106	19:55:00	37	A4	0.2453	ZDBp799	DM0-growth
1107	20:00:00	37	A4	0.2448	ZDBp799	DM0-growth
1108	20:05:00	37	A4	0.2443	ZDBp799	DM0-growth
1109	20:10:00	37	A4	0.2444	ZDBp799	DM0-growth
1110	20:15:00	37	A4	0.2443	ZDBp799	DM0-growth
1111	20:20:00	37	A4	0.2444	ZDBp799	DM0-growth
1112	20:25:00	37	A4	0.2435	ZDBp799	DM0-growth
1113	20:30:00	37	A4	0.2434	ZDBp799	DM0-growth
1114	20:35:00	37	A4	0.2432	ZDBp799	DM0-growth
1115	20:40:00	37	A4	0.2433	ZDBp799	DM0-growth
1116	20:45:00	37	A4	0.243	ZDBp799	DM0-growth
1117	20:50:00	37	A4	0.2433	ZDBp799	DM0-growth
1118	20:55:00	37	A4	0.2425	ZDBp799	DM0-growth
1119	21:00:00	37	A4	0.2429	ZDBp799	DM0-growth
1120	21:05:00	37	A4	0.243	ZDBp799	DM0-growth
1121	21:10:00	37	A4	0.2421	ZDBp799	DM0-growth
1122	21:15:00	37	A4	0.2422	ZDBp799	DM0-growth
1123	21:20:00	37	A4	0.2422	ZDBp799	DM0-growth
1124	21:25:00	37	A4	0.2419	ZDBp799	DM0-growth
1125	21:30:00	37	A4	0.2412	ZDBp799	DM0-growth
1126	21:35:00	37	A4	0.2427	ZDBp799	DM0-growth
1127	21:40:00	37	A4	0.2414	ZDBp799	DM0-growth
1128	21:45:00	37	A4	0.2419	ZDBp799	DM0-growth
1129	21:50:00	37	A4	0.241	ZDBp799	DM0-growth
1130	21:55:00	37	A4	0.2411	ZDBp799	DM0-growth
1131	22:00:00	37	A4	0.2407	ZDBp799	DM0-growth
1132	22:05:00	37	A4	0.2409	ZDBp799	DM0-growth
1133	22:10:00	37	A4	0.2402	ZDBp799	DM0-growth
1134	22:15:00	37	A4	0.2402	ZDBp799	DM0-growth
1135	22:20:00	37	A4	0.2401	ZDBp799	DM0-growth
1136	22:25:00	37	A4	0.2403	ZDBp799	DM0-growth
1137	22:30:00	37	A4	0.2401	ZDBp799	DM0-growth
1138	22:35:00	37	A4	0.2401	ZDBp799	DM0-growth
1139	22:40:00	37	A4	0.2398	ZDBp799	DM0-growth
1140	22:45:00	37	A4	0.2398	ZDBp799	DM0-growth
1141	22:50:00	37	A4	0.2392	ZDBp799	DM0-growth
1142	22:55:00	37	A4	0.2395	ZDBp799	DM0-growth
1143	23:00:00	37	A4	0.2389	ZDBp799	DM0-growth
1144	23:05:00	37	A4	0.2384	ZDBp799	DM0-growth
1145	23:10:00	37	A4	0.2383	ZDBp799	DM0-growth
1146	23:15:00	37	A4	0.2381	ZDBp799	DM0-growth
1147	23:20:00	37	A4	0.2385	ZDBp799	DM0-growth
1148	23:25:00	37	A4	0.2389	ZDBp799	DM0-growth
1149	23:30:00	37	A4	0.238	ZDBp799	DM0-growth
1150	23:35:00	37	A4	0.2381	ZDBp799	DM0-growth
1151	23:40:00	37	A4	0.2376	ZDBp799	DM0-growth
1152	23:45:00	37	A4	0.2381	ZDBp799	DM0-growth
1153	23:50:00	37	A4	0.2375	ZDBp799	DM0-growth
1154	23:55:00	37	A4	0.2378	ZDBp799	DM0-growth
1155	24:00:00	37	A4	0.2374	ZDBp799	DM0-growth
1156	0:00:00	36	A5	0.0853	ZDBp810	DM0-growth
1157	0:05:00	36.8	A5	0.0856	ZDBp810	DM0-growth
1158	0:10:00	36.9	A5	0.0847	ZDBp810	DM0-growth
1159	0:15:00	37	A5	0.0839	ZDBp810	DM0-growth
1160	0:20:00	37	A5	0.0837	ZDBp810	DM0-growth
1161	0:25:00	37	A5	0.0841	ZDBp810	DM0-growth
1162	0:30:00	37	A5	0.0822	ZDBp810	DM0-growth
1163	0:35:00	37	A5	0.083	ZDBp810	DM0-growth
1164	0:40:00	37	A5	0.0834	ZDBp810	DM0-growth
1165	0:45:00	37	A5	0.0814	ZDBp810	DM0-growth
1166	0:50:00	37	A5	0.0819	ZDBp810	DM0-growth
1167	0:55:00	37	A5	0.0814	ZDBp810	DM0-growth
1168	1:00:00	37	A5	0.0816	ZDBp810	DM0-growth
1169	1:05:00	37	A5	0.0825	ZDBp810	DM0-growth
1170	1:10:00	37	A5	0.082	ZDBp810	DM0-growth
1171	1:15:00	37	A5	0.083	ZDBp810	DM0-growth
1172	1:20:00	37	A5	0.0829	ZDBp810	DM0-growth
1173	1:25:00	37	A5	0.083	ZDBp810	DM0-growth
1174	1:30:00	37	A5	0.0846	ZDBp810	DM0-growth
1175	1:35:00	37	A5	0.0834	ZDBp810	DM0-growth
1176	1:40:00	37	A5	0.0846	ZDBp810	DM0-growth
1177	1:45:00	37	A5	0.0872	ZDBp810	DM0-growth
1178	1:50:00	37	A5	0.0847	ZDBp810	DM0-growth
1179	1:55:00	37	A5	0.0854	ZDBp810	DM0-growth
1180	2:00:00	37	A5	0.0846	ZDBp810	DM0-growth
1181	2:05:00	37	A5	0.0855	ZDBp810	DM0-growth
1182	2:10:00	37	A5	0.0848	ZDBp810	DM0-growth
1183	2:15:00	37	A5	0.0849	ZDBp810	DM0-growth
1184	2:20:00	37	A5	0.0853	ZDBp810	DM0-growth
1185	2:25:00	37	A5	0.0867	ZDBp810	DM0-growth
1186	2:30:00	37	A5	0.0862	ZDBp810	DM0-growth
1187	2:35:00	37	A5	0.0858	ZDBp810	DM0-growth
1188	2:40:00	37	A5	0.0885	ZDBp810	DM0-growth
1189	2:45:00	37	A5	0.0861	ZDBp810	DM0-growth
1190	2:50:00	37	A5	0.0874	ZDBp810	DM0-growth
1191	2:55:00	37	A5	0.0867	ZDBp810	DM0-growth
1192	3:00:00	37	A5	0.0884	ZDBp810	DM0-growth
1193	3:05:00	37	A5	0.0893	ZDBp810	DM0-growth
1194	3:10:00	37	A5	0.0885	ZDBp810	DM0-growth
1195	3:15:00	37	A5	0.0877	ZDBp810	DM0-growth
1196	3:20:00	37	A5	0.0915	ZDBp810	DM0-growth
1197	3:25:00	37	A5	0.0884	ZDBp810	DM0-growth
1198	3:30:00	37	A5	0.0889	ZDBp810	DM0-growth
1199	3:35:00	37	A5	0.0895	ZDBp810	DM0-growth
1200	3:40:00	37	A5	0.0895	ZDBp810	DM0-growth
1201	3:45:00	37	A5	0.0897	ZDBp810	DM0-growth
1202	3:50:00	37	A5	0.0909	ZDBp810	DM0-growth
1203	3:55:00	37	A5	0.0914	ZDBp810	DM0-growth
1204	4:00:00	37	A5	0.091	ZDBp810	DM0-growth
1205	4:05:00	37	A5	0.0915	ZDBp810	DM0-growth
1206	4:10:00	37	A5	0.0932	ZDBp810	DM0-growth
1207	4:15:00	37	A5	0.0936	ZDBp810	DM0-growth
1208	4:20:00	37	A5	0.0932	ZDBp810	DM0-growth
1209	4:25:00	37	A5	0.0935	ZDBp810	DM0-growth
1210	4:30:00	37	A5	0.0941	ZDBp810	DM0-growth
1211	4:35:00	37	A5	0.096	ZDBp810	DM0-growth
1212	4:40:00	37	A5	0.0961	ZDBp810	DM0-growth
1213	4:45:00	37	A5	0.0997	ZDBp810	DM0-growth
1214	4:50:00	37	A5	0.097	ZDBp810	DM0-growth
1215	4:55:00	37	A5	0.0977	ZDBp810	DM0-growth
1216	5:00:00	37	A5	0.0985	ZDBp810	DM0-growth
1217	5:05:00	37	A5	0.1014	ZDBp810	DM0-growth
1218	5:10:00	37	A5	0.1004	ZDBp810	DM0-growth
1219	5:15:00	37	A5	0.1044	ZDBp810	DM0-growth
1220	5:20:00	37	A5	0.1058	ZDBp810	DM0-growth
1221	5:25:00	37	A5	0.105	ZDBp810	DM0-growth
1222	5:30:00	37	A5	0.1057	ZDBp810	DM0-growth
1223	5:35:00	37	A5	0.1066	ZDBp810	DM0-growth
1224	5:40:00	37	A5	0.1105	ZDBp810	DM0-growth
1225	5:45:00	37	A5	0.1084	ZDBp810	DM0-growth
1226	5:50:00	37	A5	0.1124	ZDBp810	DM0-growth
1227	5:55:00	37	A5	0.1138	ZDBp810	DM0-growth
1228	6:00:00	37	A5	0.1132	ZDBp810	DM0-growth
1229	6:05:00	37	A5	0.1175	ZDBp810	DM0-growth
1230	6:10:00	37	A5	0.1197	ZDBp810	DM0-growth
1231	6:15:00	37	A5	0.1202	ZDBp810	DM0-growth
1232	6:20:00	37	A5	0.1221	ZDBp810	DM0-growth
1233	6:25:00	37	A5	0.1234	ZDBp810	DM0-growth
1234	6:30:00	37	A5	0.1274	ZDBp810	DM0-growth
1235	6:35:00	37	A5	0.1273	ZDBp810	DM0-growth
1236	6:40:00	37	A5	0.1321	ZDBp810	DM0-growth
1237	6:45:00	37	A5	0.134	ZDBp810	DM0-growth
1238	6:50:00	37	A5	0.1347	ZDBp810	DM0-growth
1239	6:55:00	37	A5	0.1399	ZDBp810	DM0-growth
1240	7:00:00	37	A5	0.1407	ZDBp810	DM0-growth
1241	7:05:00	37	A5	0.1459	ZDBp810	DM0-growth
1242	7:10:00	37	A5	0.1489	ZDBp810	DM0-growth
1243	7:15:00	37	A5	0.1521	ZDBp810	DM0-growth
1244	7:20:00	37	A5	0.1539	ZDBp810	DM0-growth
1245	7:25:00	37	A5	0.156	ZDBp810	DM0-growth
1246	7:30:00	37	A5	0.1596	ZDBp810	DM0-growth
1247	7:35:00	37	A5	0.1612	ZDBp810	DM0-growth
1248	7:40:00	37	A5	0.1656	ZDBp810	DM0-growth
1249	7:45:00	37	A5	0.1683	ZDBp810	DM0-growth
1250	7:50:00	37	A5	0.1719	ZDBp810	DM0-growth
1251	7:55:00	37	A5	0.1745	ZDBp810	DM0-growth
1252	8:00:00	37	A5	0.1787	ZDBp810	DM0-growth
1253	8:05:00	37	A5	0.1813	ZDBp810	DM0-growth
1254	8:10:00	37	A5	0.1845	ZDBp810	DM0-growth
1255	8:15:00	37	A5	0.1876	ZDBp810	DM0-growth
1256	8:20:00	37	A5	0.1904	ZDBp810	DM0-growth
1257	8:25:00	37	A5	0.1931	ZDBp810	DM0-growth
1258	8:30:00	37	A5	0.1963	ZDBp810	DM0-growth
1259	8:35:00	37	A5	0.1992	ZDBp810	DM0-growth
1260	8:40:00	37	A5	0.2026	ZDBp810	DM0-growth
1261	8:45:00	37	A5	0.2073	ZDBp810	DM0-growth
1262	8:50:00	37	A5	0.2116	ZDBp810	DM0-growth
1263	8:55:00	37	A5	0.2152	ZDBp810	DM0-growth
1264	9:00:00	37	A5	0.2186	ZDBp810	DM0-growth
1265	9:05:00	37	A5	0.2203	ZDBp810	DM0-growth
1266	9:10:00	37	A5	0.2263	ZDBp810	DM0-growth
1267	9:15:00	37	A5	0.229	ZDBp810	DM0-growth
1268	9:20:00	37	A5	0.233	ZDBp810	DM0-growth
1269	9:25:00	37	A5	0.2385	ZDBp810	DM0-growth
1270	9:30:00	37	A5	0.2494	ZDBp810	DM0-growth
1271	9:35:00	37	A5	0.2569	ZDBp810	DM0-growth
1272	9:40:00	37	A5	0.2563	ZDBp810	DM0-growth
1273	9:45:00	37	A5	0.2589	ZDBp810	DM0-growth
1274	9:50:00	37	A5	0.26	ZDBp810	DM0-growth
1275	9:55:00	37	A5	0.2642	ZDBp810	DM0-growth
1276	10:00:00	37	A5	0.2651	ZDBp810	DM0-growth
1277	10:05:00	37	A5	0.2693	ZDBp810	DM0-growth
1278	10:10:00	37	A5	0.275	ZDBp810	DM0-growth
1279	10:15:00	37	A5	0.2874	ZDBp810	DM0-growth
1280	10:20:00	37	A5	0.3109	ZDBp810	DM0-growth
1281	10:25:00	37	A5	0.2956	ZDBp810	DM0-growth
1282	10:30:00	37	A5	0.3023	ZDBp810	DM0-growth
1283	10:35:00	37	A5	0.2935	ZDBp810	DM0-growth
1284	10:40:00	37	A5	0.2744	ZDBp810	DM0-growth
1285	10:45:00	37	A5	0.2676	ZDBp810	DM0-growth
1286	10:50:00	37	A5	0.2731	ZDBp810	DM0-growth
1287	10:55:00	37	A5	0.271	ZDBp810	DM0-growth
1288	11:00:00	37	A5	0.2716	ZDBp810	DM0-growth
1289	11:05:00	37	A5	0.2667	ZDBp810	DM0-growth
1290	11:10:00	37	A5	0.2672	ZDBp810	DM0-growth
1291	11:15:00	37	A5	0.2641	ZDBp810	DM0-growth
1292	11:20:00	37	A5	0.2641	ZDBp810	DM0-growth
1293	11:25:00	37	A5	0.2612	ZDBp810	DM0-growth
1294	11:30:00	37	A5	0.2637	ZDBp810	DM0-growth
1295	11:35:00	37	A5	0.2626	ZDBp810	DM0-growth
1296	11:40:00	37	A5	0.2598	ZDBp810	DM0-growth
1297	11:45:00	37	A5	0.2643	ZDBp810	DM0-growth
1298	11:50:00	37	A5	0.2649	ZDBp810	DM0-growth
1299	11:55:00	37	A5	0.2684	ZDBp810	DM0-growth
1300	12:00:00	37	A5	0.2659	ZDBp810	DM0-growth
1301	12:05:00	37	A5	0.2734	ZDBp810	DM0-growth
1302	12:10:00	37	A5	0.2655	ZDBp810	DM0-growth
1303	12:15:00	37	A5	0.2635	ZDBp810	DM0-growth
1304	12:20:00	37	A5	0.2663	ZDBp810	DM0-growth
1305	12:25:00	37	A5	0.2624	ZDBp810	DM0-growth
1306	12:30:00	37	A5	0.2626	ZDBp810	DM0-growth
1307	12:35:00	37	A5	0.2628	ZDBp810	DM0-growth
1308	12:40:00	37	A5	0.2637	ZDBp810	DM0-growth
1309	12:45:00	37	A5	0.2643	ZDBp810	DM0-growth
1310	12:50:00	37	A5	0.2614	ZDBp810	DM0-growth
1311	12:55:00	37	A5	0.2617	ZDBp810	DM0-growth
1312	13:00:00	37	A5	0.262	ZDBp810	DM0-growth
1313	13:05:00	37	A5	0.2609	ZDBp810	DM0-growth
1314	13:10:00	37	A5	0.2605	ZDBp810	DM0-growth
1315	13:15:00	37	A5	0.2606	ZDBp810	DM0-growth
1316	13:20:00	37	A5	0.2596	ZDBp810	DM0-growth
1317	13:25:00	37	A5	0.2606	ZDBp810	DM0-growth
1318	13:30:00	37	A5	0.2605	ZDBp810	DM0-growth
1319	13:35:00	37	A5	0.2607	ZDBp810	DM0-growth
1320	13:40:00	37	A5	0.2602	ZDBp810	DM0-growth
1321	13:45:00	37	A5	0.2609	ZDBp810	DM0-growth
1322	13:50:00	37	A5	0.2598	ZDBp810	DM0-growth
1323	13:55:00	37	A5	0.2604	ZDBp810	DM0-growth
1324	14:00:00	37	A5	0.2597	ZDBp810	DM0-growth
1325	14:05:00	37	A5	0.2598	ZDBp810	DM0-growth
1326	14:10:00	37	A5	0.2595	ZDBp810	DM0-growth
1327	14:15:00	37	A5	0.2602	ZDBp810	DM0-growth
1328	14:20:00	37	A5	0.2598	ZDBp810	DM0-growth
1329	14:25:00	37	A5	0.261	ZDBp810	DM0-growth
1330	14:30:00	37	A5	0.2598	ZDBp810	DM0-growth
1331	14:35:00	37	A5	0.2604	ZDBp810	DM0-growth
1332	14:40:00	37	A5	0.2607	ZDBp810	DM0-growth
1333	14:45:00	37	A5	0.26	ZDBp810	DM0-growth
1334	14:50:00	37	A5	0.2603	ZDBp810	DM0-growth
1335	14:55:00	37	A5	0.2612	ZDBp810	DM0-growth
1336	15:00:00	37	A5	0.2611	ZDBp810	DM0-growth
1337	15:05:00	37	A5	0.2605	ZDBp810	DM0-growth
1338	15:10:00	37	A5	0.2622	ZDBp810	DM0-growth
1339	15:15:00	37	A5	0.2618	ZDBp810	DM0-growth
1340	15:20:00	37	A5	0.2614	ZDBp810	DM0-growth
1341	15:25:00	37	A5	0.2637	ZDBp810	DM0-growth
1342	15:30:00	37	A5	0.2641	ZDBp810	DM0-growth
1343	15:35:00	37	A5	0.264	ZDBp810	DM0-growth
1344	15:40:00	37	A5	0.2636	ZDBp810	DM0-growth
1345	15:45:00	37	A5	0.2643	ZDBp810	DM0-growth
1346	15:50:00	37	A5	0.2652	ZDBp810	DM0-growth
1347	15:55:00	37	A5	0.2657	ZDBp810	DM0-growth
1348	16:00:00	37	A5	0.2656	ZDBp810	DM0-growth
1349	16:05:00	37	A5	0.2658	ZDBp810	DM0-growth
1350	16:10:00	37	A5	0.2643	ZDBp810	DM0-growth
1351	16:15:00	37	A5	0.2646	ZDBp810	DM0-growth
1352	16:20:00	37	A5	0.2649	ZDBp810	DM0-growth
1353	16:25:00	37	A5	0.2648	ZDBp810	DM0-growth
1354	16:30:00	37	A5	0.2646	ZDBp810	DM0-growth
1355	16:35:00	37	A5	0.2659	ZDBp810	DM0-growth
1356	16:40:00	37	A5	0.267	ZDBp810	DM0-growth
1357	16:45:00	37	A5	0.266	ZDBp810	DM0-growth
1358	16:50:00	37	A5	0.268	ZDBp810	DM0-growth
1359	16:55:00	37	A5	0.268	ZDBp810	DM0-growth
1360	17:00:00	37	A5	0.2675	ZDBp810	DM0-growth
1361	17:05:00	37	A5	0.2673	ZDBp810	DM0-growth
1362	17:10:00	37	A5	0.2678	ZDBp810	DM0-growth
1363	17:15:00	37	A5	0.2673	ZDBp810	DM0-growth
1364	17:20:00	37	A5	0.268	ZDBp810	DM0-growth
1365	17:25:00	37	A5	0.2687	ZDBp810	DM0-growth
1366	17:30:00	37	A5	0.2674	ZDBp810	DM0-growth
1367	17:35:00	37	A5	0.2691	ZDBp810	DM0-growth
1368	17:40:00	37	A5	0.2686	ZDBp810	DM0-growth
1369	17:45:00	37	A5	0.2683	ZDBp810	DM0-growth
1370	17:50:00	37	A5	0.2692	ZDBp810	DM0-growth
1371	17:55:00	37	A5	0.2691	ZDBp810	DM0-growth
1372	18:00:00	37	A5	0.2686	ZDBp810	DM0-growth
1373	18:05:00	37	A5	0.2708	ZDBp810	DM0-growth
1374	18:10:00	37	A5	0.2712	ZDBp810	DM0-growth
1375	18:15:00	37	A5	0.2715	ZDBp810	DM0-growth
1376	18:20:00	37	A5	0.2705	ZDBp810	DM0-growth
1377	18:25:00	37	A5	0.2703	ZDBp810	DM0-growth
1378	18:30:00	37	A5	0.271	ZDBp810	DM0-growth
1379	18:35:00	37	A5	0.2715	ZDBp810	DM0-growth
1380	18:40:00	37	A5	0.2723	ZDBp810	DM0-growth
1381	18:45:00	37	A5	0.2715	ZDBp810	DM0-growth
1382	18:50:00	37	A5	0.2728	ZDBp810	DM0-growth
1383	18:55:00	37	A5	0.2741	ZDBp810	DM0-growth
1384	19:00:00	37	A5	0.274	ZDBp810	DM0-growth
1385	19:05:00	37	A5	0.2739	ZDBp810	DM0-growth
1386	19:10:00	37	A5	0.275	ZDBp810	DM0-growth
1387	19:15:00	37	A5	0.2745	ZDBp810	DM0-growth
1388	19:20:00	37	A5	0.2749	ZDBp810	DM0-growth
1389	19:25:00	37	A5	0.2773	ZDBp810	DM0-growth
1390	19:30:00	37	A5	0.2776	ZDBp810	DM0-growth
1391	19:35:00	37	A5	0.2761	ZDBp810	DM0-growth
1392	19:40:00	37	A5	0.2771	ZDBp810	DM0-growth
1393	19:45:00	37	A5	0.2768	ZDBp810	DM0-growth
1394	19:50:00	37	A5	0.2778	ZDBp810	DM0-growth
1395	19:55:00	37	A5	0.278	ZDBp810	DM0-growth
1396	20:00:00	37	A5	0.2806	ZDBp810	DM0-growth
1397	20:05:00	37	A5	0.2822	ZDBp810	DM0-growth
1398	20:10:00	37	A5	0.2808	ZDBp810	DM0-growth
1399	20:15:00	37	A5	0.2813	ZDBp810	DM0-growth
1400	20:20:00	37	A5	0.2799	ZDBp810	DM0-growth
1401	20:25:00	37	A5	0.282	ZDBp810	DM0-growth
1402	20:30:00	37	A5	0.2837	ZDBp810	DM0-growth
1403	20:35:00	37	A5	0.2837	ZDBp810	DM0-growth
1404	20:40:00	37	A5	0.284	ZDBp810	DM0-growth
1405	20:45:00	37	A5	0.285	ZDBp810	DM0-growth
1406	20:50:00	37	A5	0.285	ZDBp810	DM0-growth
1407	20:55:00	37	A5	0.2866	ZDBp810	DM0-growth
1408	21:00:00	37	A5	0.2848	ZDBp810	DM0-growth
1409	21:05:00	37	A5	0.287	ZDBp810	DM0-growth
1410	21:10:00	37	A5	0.2864	ZDBp810	DM0-growth
1411	21:15:00	37	A5	0.286	ZDBp810	DM0-growth
1412	21:20:00	37	A5	0.2871	ZDBp810	DM0-growth
1413	21:25:00	37	A5	0.2871	ZDBp810	DM0-growth
1414	21:30:00	37	A5	0.2857	ZDBp810	DM0-growth
1415	21:35:00	37	A5	0.2884	ZDBp810	DM0-growth
1416	21:40:00	37	A5	0.2879	ZDBp810	DM0-growth
1417	21:45:00	37	A5	0.2873	ZDBp810	DM0-growth
1418	21:50:00	37	A5	0.2887	ZDBp810	DM0-growth
1419	21:55:00	37	A5	0.2861	ZDBp810	DM0-growth
1420	22:00:00	37	A5	0.2897	ZDBp810	DM0-growth
1421	22:05:00	37	A5	0.2907	ZDBp810	DM0-growth
1422	22:10:00	37	A5	0.2876	ZDBp810	DM0-growth
1423	22:15:00	37	A5	0.2876	ZDBp810	DM0-growth
1424	22:20:00	37	A5	0.2905	ZDBp810	DM0-growth
1425	22:25:00	37	A5	0.2907	ZDBp810	DM0-growth
1426	22:30:00	37	A5	0.2902	ZDBp810	DM0-growth
1427	22:35:00	37	A5	0.2912	ZDBp810	DM0-growth
1428	22:40:00	37	A5	0.2915	ZDBp810	DM0-growth
1429	22:45:00	37	A5	0.2922	ZDBp810	DM0-growth
1430	22:50:00	37	A5	0.2932	ZDBp810	DM0-growth
1431	22:55:00	37	A5	0.2936	ZDBp810	DM0-growth
1432	23:00:00	37	A5	0.2929	ZDBp810	DM0-growth
1433	23:05:00	37	A5	0.2932	ZDBp810	DM0-growth
1434	23:10:00	37	A5	0.2934	ZDBp810	DM0-growth
1435	23:15:00	37	A5	0.2938	ZDBp810	DM0-growth
1436	23:20:00	37	A5	0.2935	ZDBp810	DM0-growth
1437	23:25:00	37	A5	0.2946	ZDBp810	DM0-growth
1438	23:30:00	37	A5	0.294	ZDBp810	DM0-growth
1439	23:35:00	37	A5	0.2943	ZDBp810	DM0-growth
1440	23:40:00	37	A5	0.2945	ZDBp810	DM0-growth
1441	23:45:00	37	A5	0.2958	ZDBp810	DM0-growth
1442	23:50:00	37	A5	0.2957	ZDBp810	DM0-growth
1443	23:55:00	37	A5	0.2978	ZDBp810	DM0-growth
1444	24:00:00	37	A5	0.2944	ZDBp810	DM0-growth
1445	0:00:00	36	A6	0.0809	ZDBp810	DM0-growth
1446	0:05:00	36.8	A6	0.0804	ZDBp810	DM0-growth
1447	0:10:00	36.9	A6	0.0792	ZDBp810	DM0-growth
1448	0:15:00	37	A6	0.0781	ZDBp810	DM0-growth
1449	0:20:00	37	A6	0.0778	ZDBp810	DM0-growth
1450	0:25:00	37	A6	0.0774	ZDBp810	DM0-growth
1451	0:30:00	37	A6	0.0774	ZDBp810	DM0-growth
1452	0:35:00	37	A6	0.0775	ZDBp810	DM0-growth
1453	0:40:00	37	A6	0.0772	ZDBp810	DM0-growth
1454	0:45:00	37	A6	0.0774	ZDBp810	DM0-growth
1455	0:50:00	37	A6	0.0774	ZDBp810	DM0-growth
1456	0:55:00	37	A6	0.0775	ZDBp810	DM0-growth
1457	1:00:00	37	A6	0.0778	ZDBp810	DM0-growth
1458	1:05:00	37	A6	0.0776	ZDBp810	DM0-growth
1459	1:10:00	37	A6	0.0778	ZDBp810	DM0-growth
1460	1:15:00	37	A6	0.0779	ZDBp810	DM0-growth
1461	1:20:00	37	A6	0.0782	ZDBp810	DM0-growth
1462	1:25:00	37	A6	0.0782	ZDBp810	DM0-growth
1463	1:30:00	37	A6	0.0784	ZDBp810	DM0-growth
1464	1:35:00	37	A6	0.0785	ZDBp810	DM0-growth
1465	1:40:00	37	A6	0.0785	ZDBp810	DM0-growth
1466	1:45:00	37	A6	0.0786	ZDBp810	DM0-growth
1467	1:50:00	37	A6	0.0785	ZDBp810	DM0-growth
1468	1:55:00	37	A6	0.0789	ZDBp810	DM0-growth
1469	2:00:00	37	A6	0.0791	ZDBp810	DM0-growth
1470	2:05:00	37	A6	0.0793	ZDBp810	DM0-growth
1471	2:10:00	37	A6	0.0794	ZDBp810	DM0-growth
1472	2:15:00	37	A6	0.0798	ZDBp810	DM0-growth
1473	2:20:00	37	A6	0.0797	ZDBp810	DM0-growth
1474	2:25:00	37	A6	0.0799	ZDBp810	DM0-growth
1475	2:30:00	37	A6	0.08	ZDBp810	DM0-growth
1476	2:35:00	37	A6	0.0803	ZDBp810	DM0-growth
1477	2:40:00	37	A6	0.0805	ZDBp810	DM0-growth
1478	2:45:00	37	A6	0.0806	ZDBp810	DM0-growth
1479	2:50:00	37	A6	0.0808	ZDBp810	DM0-growth
1480	2:55:00	37	A6	0.0809	ZDBp810	DM0-growth
1481	3:00:00	37	A6	0.0812	ZDBp810	DM0-growth
1482	3:05:00	37	A6	0.0816	ZDBp810	DM0-growth
1483	3:10:00	37	A6	0.0817	ZDBp810	DM0-growth
1484	3:15:00	37	A6	0.082	ZDBp810	DM0-growth
1485	3:20:00	37	A6	0.0823	ZDBp810	DM0-growth
1486	3:25:00	37	A6	0.0825	ZDBp810	DM0-growth
1487	3:30:00	37	A6	0.083	ZDBp810	DM0-growth
1488	3:35:00	37	A6	0.0833	ZDBp810	DM0-growth
1489	3:40:00	37	A6	0.0836	ZDBp810	DM0-growth
1490	3:45:00	37	A6	0.0843	ZDBp810	DM0-growth
1491	3:50:00	37	A6	0.0847	ZDBp810	DM0-growth
1492	3:55:00	37	A6	0.0852	ZDBp810	DM0-growth
1493	4:00:00	37	A6	0.0856	ZDBp810	DM0-growth
1494	4:05:00	37	A6	0.0861	ZDBp810	DM0-growth
1495	4:10:00	37	A6	0.0866	ZDBp810	DM0-growth
1496	4:15:00	37	A6	0.0871	ZDBp810	DM0-growth
1497	4:20:00	37	A6	0.0876	ZDBp810	DM0-growth
1498	4:25:00	37	A6	0.0881	ZDBp810	DM0-growth
1499	4:30:00	37	A6	0.0889	ZDBp810	DM0-growth
1500	4:35:00	37	A6	0.0896	ZDBp810	DM0-growth
1501	4:40:00	37	A6	0.0902	ZDBp810	DM0-growth
1502	4:45:00	37	A6	0.091	ZDBp810	DM0-growth
1503	4:50:00	37	A6	0.0919	ZDBp810	DM0-growth
1504	4:55:00	37	A6	0.0925	ZDBp810	DM0-growth
1505	5:00:00	37	A6	0.0933	ZDBp810	DM0-growth
1506	5:05:00	37	A6	0.0943	ZDBp810	DM0-growth
1507	5:10:00	37	A6	0.0953	ZDBp810	DM0-growth
1508	5:15:00	37	A6	0.0965	ZDBp810	DM0-growth
1509	5:20:00	37	A6	0.0975	ZDBp810	DM0-growth
1510	5:25:00	37	A6	0.0986	ZDBp810	DM0-growth
1511	5:30:00	37	A6	0.1	ZDBp810	DM0-growth
1512	5:35:00	37	A6	0.1012	ZDBp810	DM0-growth
1513	5:40:00	37	A6	0.1029	ZDBp810	DM0-growth
1514	5:45:00	37	A6	0.1043	ZDBp810	DM0-growth
1515	5:50:00	37	A6	0.1058	ZDBp810	DM0-growth
1516	5:55:00	37	A6	0.1074	ZDBp810	DM0-growth
1517	6:00:00	37	A6	0.109	ZDBp810	DM0-growth
1518	6:05:00	37	A6	0.1112	ZDBp810	DM0-growth
1519	6:10:00	37	A6	0.1132	ZDBp810	DM0-growth
1520	6:15:00	37	A6	0.1156	ZDBp810	DM0-growth
1521	6:20:00	37	A6	0.1177	ZDBp810	DM0-growth
1522	6:25:00	37	A6	0.12	ZDBp810	DM0-growth
1523	6:30:00	37	A6	0.1227	ZDBp810	DM0-growth
1524	6:35:00	37	A6	0.1251	ZDBp810	DM0-growth
1525	6:40:00	37	A6	0.1283	ZDBp810	DM0-growth
1526	6:45:00	37	A6	0.131	ZDBp810	DM0-growth
1527	6:50:00	37	A6	0.1341	ZDBp810	DM0-growth
1528	6:55:00	37	A6	0.1368	ZDBp810	DM0-growth
1529	7:00:00	37	A6	0.1391	ZDBp810	DM0-growth
1530	7:05:00	37	A6	0.142	ZDBp810	DM0-growth
1531	7:10:00	37	A6	0.1449	ZDBp810	DM0-growth
1532	7:15:00	37	A6	0.148	ZDBp810	DM0-growth
1533	7:20:00	37	A6	0.151	ZDBp810	DM0-growth
1534	7:25:00	37	A6	0.1542	ZDBp810	DM0-growth
1535	7:30:00	37	A6	0.1572	ZDBp810	DM0-growth
1536	7:35:00	37	A6	0.1603	ZDBp810	DM0-growth
1537	7:40:00	37	A6	0.1628	ZDBp810	DM0-growth
1538	7:45:00	37	A6	0.1657	ZDBp810	DM0-growth
1539	7:50:00	37	A6	0.1684	ZDBp810	DM0-growth
1540	7:55:00	37	A6	0.1714	ZDBp810	DM0-growth
1541	8:00:00	37	A6	0.174	ZDBp810	DM0-growth
1542	8:05:00	37	A6	0.1767	ZDBp810	DM0-growth
1543	8:10:00	37	A6	0.1795	ZDBp810	DM0-growth
1544	8:15:00	37	A6	0.1826	ZDBp810	DM0-growth
1545	8:20:00	37	A6	0.1857	ZDBp810	DM0-growth
1546	8:25:00	37	A6	0.1892	ZDBp810	DM0-growth
1547	8:30:00	37	A6	0.1926	ZDBp810	DM0-growth
1548	8:35:00	37	A6	0.1967	ZDBp810	DM0-growth
1549	8:40:00	37	A6	0.2	ZDBp810	DM0-growth
1550	8:45:00	37	A6	0.2041	ZDBp810	DM0-growth
1551	8:50:00	37	A6	0.2078	ZDBp810	DM0-growth
1552	8:55:00	37	A6	0.2114	ZDBp810	DM0-growth
1553	9:00:00	37	A6	0.2157	ZDBp810	DM0-growth
1554	9:05:00	37	A6	0.2179	ZDBp810	DM0-growth
1555	9:10:00	37	A6	0.2241	ZDBp810	DM0-growth
1556	9:15:00	37	A6	0.2336	ZDBp810	DM0-growth
1557	9:20:00	37	A6	0.2453	ZDBp810	DM0-growth
1558	9:25:00	37	A6	0.2515	ZDBp810	DM0-growth
1559	9:30:00	37	A6	0.2589	ZDBp810	DM0-growth
1560	9:35:00	37	A6	0.2677	ZDBp810	DM0-growth
1561	9:40:00	37	A6	0.2748	ZDBp810	DM0-growth
1562	9:45:00	37	A6	0.2836	ZDBp810	DM0-growth
1563	9:50:00	37	A6	0.2869	ZDBp810	DM0-growth
1564	9:55:00	37	A6	0.319	ZDBp810	DM0-growth
1565	10:00:00	37	A6	0.323	ZDBp810	DM0-growth
1566	10:05:00	37	A6	0.3218	ZDBp810	DM0-growth
1567	10:10:00	37	A6	0.3041	ZDBp810	DM0-growth
1568	10:15:00	37	A6	0.2939	ZDBp810	DM0-growth
1569	10:20:00	37	A6	0.2896	ZDBp810	DM0-growth
1570	10:25:00	37	A6	0.2746	ZDBp810	DM0-growth
1571	10:30:00	37	A6	0.2717	ZDBp810	DM0-growth
1572	10:35:00	37	A6	0.2647	ZDBp810	DM0-growth
1573	10:40:00	37	A6	0.2619	ZDBp810	DM0-growth
1574	10:45:00	37	A6	0.2616	ZDBp810	DM0-growth
1575	10:50:00	37	A6	0.2641	ZDBp810	DM0-growth
1576	10:55:00	37	A6	0.261	ZDBp810	DM0-growth
1577	11:00:00	37	A6	0.2636	ZDBp810	DM0-growth
1578	11:05:00	37	A6	0.2641	ZDBp810	DM0-growth
1579	11:10:00	37	A6	0.2645	ZDBp810	DM0-growth
1580	11:15:00	37	A6	0.263	ZDBp810	DM0-growth
1581	11:20:00	37	A6	0.2619	ZDBp810	DM0-growth
1582	11:25:00	37	A6	0.2608	ZDBp810	DM0-growth
1583	11:30:00	37	A6	0.259	ZDBp810	DM0-growth
1584	11:35:00	37	A6	0.2614	ZDBp810	DM0-growth
1585	11:40:00	37	A6	0.2576	ZDBp810	DM0-growth
1586	11:45:00	37	A6	0.2569	ZDBp810	DM0-growth
1587	11:50:00	37	A6	0.2566	ZDBp810	DM0-growth
1588	11:55:00	37	A6	0.2555	ZDBp810	DM0-growth
1589	12:00:00	37	A6	0.255	ZDBp810	DM0-growth
1590	12:05:00	37	A6	0.2549	ZDBp810	DM0-growth
1591	12:10:00	37	A6	0.2569	ZDBp810	DM0-growth
1592	12:15:00	37	A6	0.2551	ZDBp810	DM0-growth
1593	12:20:00	37	A6	0.2542	ZDBp810	DM0-growth
1594	12:25:00	37	A6	0.2541	ZDBp810	DM0-growth
1595	12:30:00	37	A6	0.2532	ZDBp810	DM0-growth
1596	12:35:00	37	A6	0.2535	ZDBp810	DM0-growth
1597	12:40:00	37	A6	0.2543	ZDBp810	DM0-growth
1598	12:45:00	37	A6	0.2541	ZDBp810	DM0-growth
1599	12:50:00	37	A6	0.2549	ZDBp810	DM0-growth
1600	12:55:00	37	A6	0.2554	ZDBp810	DM0-growth
1601	13:00:00	37	A6	0.2547	ZDBp810	DM0-growth
1602	13:05:00	37	A6	0.2548	ZDBp810	DM0-growth
1603	13:10:00	37	A6	0.2575	ZDBp810	DM0-growth
1604	13:15:00	37	A6	0.2556	ZDBp810	DM0-growth
1605	13:20:00	37	A6	0.2563	ZDBp810	DM0-growth
1606	13:25:00	37	A6	0.2564	ZDBp810	DM0-growth
1607	13:30:00	37	A6	0.2561	ZDBp810	DM0-growth
1608	13:35:00	37	A6	0.2572	ZDBp810	DM0-growth
1609	13:40:00	37	A6	0.2555	ZDBp810	DM0-growth
1610	13:45:00	37	A6	0.2564	ZDBp810	DM0-growth
1611	13:50:00	37	A6	0.2566	ZDBp810	DM0-growth
1612	13:55:00	37	A6	0.2558	ZDBp810	DM0-growth
1613	14:00:00	37	A6	0.2565	ZDBp810	DM0-growth
1614	14:05:00	37	A6	0.2558	ZDBp810	DM0-growth
1615	14:10:00	37	A6	0.2557	ZDBp810	DM0-growth
1616	14:15:00	37	A6	0.2562	ZDBp810	DM0-growth
1617	14:20:00	37	A6	0.2569	ZDBp810	DM0-growth
1618	14:25:00	37	A6	0.2576	ZDBp810	DM0-growth
1619	14:30:00	37	A6	0.2579	ZDBp810	DM0-growth
1620	14:35:00	37	A6	0.2585	ZDBp810	DM0-growth
1621	14:40:00	37	A6	0.2586	ZDBp810	DM0-growth
1622	14:45:00	37	A6	0.2586	ZDBp810	DM0-growth
1623	14:50:00	37	A6	0.2593	ZDBp810	DM0-growth
1624	14:55:00	37	A6	0.2599	ZDBp810	DM0-growth
1625	15:00:00	37	A6	0.2589	ZDBp810	DM0-growth
1626	15:05:00	37	A6	0.2598	ZDBp810	DM0-growth
1627	15:10:00	37	A6	0.2597	ZDBp810	DM0-growth
1628	15:15:00	37	A6	0.2591	ZDBp810	DM0-growth
1629	15:20:00	37	A6	0.26	ZDBp810	DM0-growth
1630	15:25:00	37	A6	0.2594	ZDBp810	DM0-growth
1631	15:30:00	37	A6	0.2598	ZDBp810	DM0-growth
1632	15:35:00	37	A6	0.2597	ZDBp810	DM0-growth
1633	15:40:00	37	A6	0.2602	ZDBp810	DM0-growth
1634	15:45:00	37	A6	0.2604	ZDBp810	DM0-growth
1635	15:50:00	37	A6	0.2603	ZDBp810	DM0-growth
1636	15:55:00	37	A6	0.261	ZDBp810	DM0-growth
1637	16:00:00	37	A6	0.2606	ZDBp810	DM0-growth
1638	16:05:00	37	A6	0.2611	ZDBp810	DM0-growth
1639	16:10:00	37	A6	0.261	ZDBp810	DM0-growth
1640	16:15:00	37	A6	0.2614	ZDBp810	DM0-growth
1641	16:20:00	37	A6	0.2614	ZDBp810	DM0-growth
1642	16:25:00	37	A6	0.2622	ZDBp810	DM0-growth
1643	16:30:00	37	A6	0.2619	ZDBp810	DM0-growth
1644	16:35:00	37	A6	0.2625	ZDBp810	DM0-growth
1645	16:40:00	37	A6	0.2618	ZDBp810	DM0-growth
1646	16:45:00	37	A6	0.2621	ZDBp810	DM0-growth
1647	16:50:00	37	A6	0.2619	ZDBp810	DM0-growth
1648	16:55:00	37	A6	0.2619	ZDBp810	DM0-growth
1649	17:00:00	37	A6	0.2615	ZDBp810	DM0-growth
1650	17:05:00	37	A6	0.2638	ZDBp810	DM0-growth
1651	17:10:00	37	A6	0.2639	ZDBp810	DM0-growth
1652	17:15:00	37	A6	0.2649	ZDBp810	DM0-growth
1653	17:20:00	37	A6	0.2627	ZDBp810	DM0-growth
1654	17:25:00	37	A6	0.2637	ZDBp810	DM0-growth
1655	17:30:00	37	A6	0.2666	ZDBp810	DM0-growth
1656	17:35:00	37	A6	0.2643	ZDBp810	DM0-growth
1657	17:40:00	37	A6	0.2657	ZDBp810	DM0-growth
1658	17:45:00	37	A6	0.2668	ZDBp810	DM0-growth
1659	17:50:00	37	A6	0.2652	ZDBp810	DM0-growth
1660	17:55:00	37	A6	0.2661	ZDBp810	DM0-growth
1661	18:00:00	37	A6	0.2655	ZDBp810	DM0-growth
1662	18:05:00	37	A6	0.266	ZDBp810	DM0-growth
1663	18:10:00	37	A6	0.2656	ZDBp810	DM0-growth
1664	18:15:00	37	A6	0.2658	ZDBp810	DM0-growth
1665	18:20:00	37	A6	0.2659	ZDBp810	DM0-growth
1666	18:25:00	37	A6	0.2656	ZDBp810	DM0-growth
1667	18:30:00	37	A6	0.2675	ZDBp810	DM0-growth
1668	18:35:00	37	A6	0.2659	ZDBp810	DM0-growth
1669	18:40:00	37	A6	0.2638	ZDBp810	DM0-growth
1670	18:45:00	37	A6	0.2678	ZDBp810	DM0-growth
1671	18:50:00	37	A6	0.2652	ZDBp810	DM0-growth
1672	18:55:00	37	A6	0.2668	ZDBp810	DM0-growth
1673	19:00:00	37	A6	0.2667	ZDBp810	DM0-growth
1674	19:05:00	37	A6	0.2666	ZDBp810	DM0-growth
1675	19:10:00	37	A6	0.2679	ZDBp810	DM0-growth
1676	19:15:00	37	A6	0.2668	ZDBp810	DM0-growth
1677	19:20:00	37	A6	0.2659	ZDBp810	DM0-growth
1678	19:25:00	37	A6	0.2686	ZDBp810	DM0-growth
1679	19:30:00	37	A6	0.2686	ZDBp810	DM0-growth
1680	19:35:00	37	A6	0.2677	ZDBp810	DM0-growth
1681	19:40:00	37	A6	0.2698	ZDBp810	DM0-growth
1682	19:45:00	37	A6	0.2698	ZDBp810	DM0-growth
1683	19:50:00	37	A6	0.2706	ZDBp810	DM0-growth
1684	19:55:00	37	A6	0.2701	ZDBp810	DM0-growth
1685	20:00:00	37	A6	0.2722	ZDBp810	DM0-growth
1686	20:05:00	37	A6	0.2711	ZDBp810	DM0-growth
1687	20:10:00	37	A6	0.2728	ZDBp810	DM0-growth
1688	20:15:00	37	A6	0.2725	ZDBp810	DM0-growth
1689	20:20:00	37	A6	0.2715	ZDBp810	DM0-growth
1690	20:25:00	37	A6	0.2728	ZDBp810	DM0-growth
1691	20:30:00	37	A6	0.2725	ZDBp810	DM0-growth
1692	20:35:00	37	A6	0.2746	ZDBp810	DM0-growth
1693	20:40:00	37	A6	0.2751	ZDBp810	DM0-growth
1694	20:45:00	37	A6	0.2734	ZDBp810	DM0-growth
1695	20:50:00	37	A6	0.2742	ZDBp810	DM0-growth
1696	20:55:00	37	A6	0.2752	ZDBp810	DM0-growth
1697	21:00:00	37	A6	0.2756	ZDBp810	DM0-growth
1698	21:05:00	37	A6	0.2761	ZDBp810	DM0-growth
1699	21:10:00	37	A6	0.275	ZDBp810	DM0-growth
1700	21:15:00	37	A6	0.276	ZDBp810	DM0-growth
1701	21:20:00	37	A6	0.2762	ZDBp810	DM0-growth
1702	21:25:00	37	A6	0.275	ZDBp810	DM0-growth
1703	21:30:00	37	A6	0.2769	ZDBp810	DM0-growth
1704	21:35:00	37	A6	0.2759	ZDBp810	DM0-growth
1705	21:40:00	37	A6	0.2771	ZDBp810	DM0-growth
1706	21:45:00	37	A6	0.277	ZDBp810	DM0-growth
1707	21:50:00	37	A6	0.2764	ZDBp810	DM0-growth
1708	21:55:00	37	A6	0.2815	ZDBp810	DM0-growth
1709	22:00:00	37	A6	0.2798	ZDBp810	DM0-growth
1710	22:05:00	37	A6	0.2802	ZDBp810	DM0-growth
1711	22:10:00	37	A6	0.2805	ZDBp810	DM0-growth
1712	22:15:00	37	A6	0.2804	ZDBp810	DM0-growth
1713	22:20:00	37	A6	0.2813	ZDBp810	DM0-growth
1714	22:25:00	37	A6	0.2833	ZDBp810	DM0-growth
1715	22:30:00	37	A6	0.2825	ZDBp810	DM0-growth
1716	22:35:00	37	A6	0.2836	ZDBp810	DM0-growth
1717	22:40:00	37	A6	0.2843	ZDBp810	DM0-growth
1718	22:45:00	37	A6	0.2849	ZDBp810	DM0-growth
1719	22:50:00	37	A6	0.2835	ZDBp810	DM0-growth
1720	22:55:00	37	A6	0.2846	ZDBp810	DM0-growth
1721	23:00:00	37	A6	0.2842	ZDBp810	DM0-growth
1722	23:05:00	37	A6	0.2842	ZDBp810	DM0-growth
1723	23:10:00	37	A6	0.284	ZDBp810	DM0-growth
1724	23:15:00	37	A6	0.2846	ZDBp810	DM0-growth
1725	23:20:00	37	A6	0.2848	ZDBp810	DM0-growth
1726	23:25:00	37	A6	0.2853	ZDBp810	DM0-growth
1727	23:30:00	37	A6	0.2851	ZDBp810	DM0-growth
1728	23:35:00	37	A6	0.2866	ZDBp810	DM0-growth
1729	23:40:00	37	A6	0.286	ZDBp810	DM0-growth
1730	23:45:00	37	A6	0.2867	ZDBp810	DM0-growth
1731	23:50:00	37	A6	0.2866	ZDBp810	DM0-growth
1732	23:55:00	37	A6	0.2871	ZDBp810	DM0-growth
1733	24:00:00	37	A6	0.287	ZDBp810	DM0-growth
1734	0:00:00	36	A7	0.0844	ZDBp806	DM0-growth
1735	0:05:00	36.8	A7	0.0834	ZDBp806	DM0-growth
1736	0:10:00	36.9	A7	0.0819	ZDBp806	DM0-growth
1737	0:15:00	37	A7	0.0799	ZDBp806	DM0-growth
1738	0:20:00	37	A7	0.0818	ZDBp806	DM0-growth
1739	0:25:00	37	A7	0.0813	ZDBp806	DM0-growth
1740	0:30:00	37	A7	0.0801	ZDBp806	DM0-growth
1741	0:35:00	37	A7	0.0817	ZDBp806	DM0-growth
1742	0:40:00	37	A7	0.081	ZDBp806	DM0-growth
1743	0:45:00	37	A7	0.081	ZDBp806	DM0-growth
1744	0:50:00	37	A7	0.0823	ZDBp806	DM0-growth
1745	0:55:00	37	A7	0.0809	ZDBp806	DM0-growth
1746	1:00:00	37	A7	0.0807	ZDBp806	DM0-growth
1747	1:05:00	37	A7	0.082	ZDBp806	DM0-growth
1748	1:10:00	37	A7	0.0812	ZDBp806	DM0-growth
1749	1:15:00	37	A7	0.0809	ZDBp806	DM0-growth
1750	1:20:00	37	A7	0.0813	ZDBp806	DM0-growth
1751	1:25:00	37	A7	0.0812	ZDBp806	DM0-growth
1752	1:30:00	37	A7	0.0812	ZDBp806	DM0-growth
1753	1:35:00	37	A7	0.0818	ZDBp806	DM0-growth
1754	1:40:00	37	A7	0.0795	ZDBp806	DM0-growth
1755	1:45:00	37	A7	0.0816	ZDBp806	DM0-growth
1756	1:50:00	37	A7	0.0824	ZDBp806	DM0-growth
1757	1:55:00	37	A7	0.0809	ZDBp806	DM0-growth
1758	2:00:00	37	A7	0.0827	ZDBp806	DM0-growth
1759	2:05:00	37	A7	0.0827	ZDBp806	DM0-growth
1760	2:10:00	37	A7	0.0819	ZDBp806	DM0-growth
1761	2:15:00	37	A7	0.0828	ZDBp806	DM0-growth
1762	2:20:00	37	A7	0.0819	ZDBp806	DM0-growth
1763	2:25:00	37	A7	0.0841	ZDBp806	DM0-growth
1764	2:30:00	37	A7	0.0842	ZDBp806	DM0-growth
1765	2:35:00	37	A7	0.0825	ZDBp806	DM0-growth
1766	2:40:00	37	A7	0.0838	ZDBp806	DM0-growth
1767	2:45:00	37	A7	0.0832	ZDBp806	DM0-growth
1768	2:50:00	37	A7	0.0851	ZDBp806	DM0-growth
1769	2:55:00	37	A7	0.084	ZDBp806	DM0-growth
1770	3:00:00	37	A7	0.084	ZDBp806	DM0-growth
1771	3:05:00	37	A7	0.0861	ZDBp806	DM0-growth
1772	3:10:00	37	A7	0.0865	ZDBp806	DM0-growth
1773	3:15:00	37	A7	0.086	ZDBp806	DM0-growth
1774	3:20:00	37	A7	0.0843	ZDBp806	DM0-growth
1775	3:25:00	37	A7	0.0844	ZDBp806	DM0-growth
1776	3:30:00	37	A7	0.087	ZDBp806	DM0-growth
1777	3:35:00	37	A7	0.0867	ZDBp806	DM0-growth
1778	3:40:00	37	A7	0.088	ZDBp806	DM0-growth
1779	3:45:00	37	A7	0.0865	ZDBp806	DM0-growth
1780	3:50:00	37	A7	0.0893	ZDBp806	DM0-growth
1781	3:55:00	37	A7	0.09	ZDBp806	DM0-growth
1782	4:00:00	37	A7	0.091	ZDBp806	DM0-growth
1783	4:05:00	37	A7	0.0915	ZDBp806	DM0-growth
1784	4:10:00	37	A7	0.0927	ZDBp806	DM0-growth
1785	4:15:00	37	A7	0.0929	ZDBp806	DM0-growth
1786	4:20:00	37	A7	0.0948	ZDBp806	DM0-growth
1787	4:25:00	37	A7	0.0936	ZDBp806	DM0-growth
1788	4:30:00	37	A7	0.0949	ZDBp806	DM0-growth
1789	4:35:00	37	A7	0.0967	ZDBp806	DM0-growth
1790	4:40:00	37	A7	0.0978	ZDBp806	DM0-growth
1791	4:45:00	37	A7	0.0974	ZDBp806	DM0-growth
1792	4:50:00	37	A7	0.1005	ZDBp806	DM0-growth
1793	4:55:00	37	A7	0.101	ZDBp806	DM0-growth
1794	5:00:00	37	A7	0.103	ZDBp806	DM0-growth
1795	5:05:00	37	A7	0.1039	ZDBp806	DM0-growth
1796	5:10:00	37	A7	0.1064	ZDBp806	DM0-growth
1797	5:15:00	37	A7	0.1061	ZDBp806	DM0-growth
1798	5:20:00	37	A7	0.1081	ZDBp806	DM0-growth
1799	5:25:00	37	A7	0.1099	ZDBp806	DM0-growth
1800	5:30:00	37	A7	0.1125	ZDBp806	DM0-growth
1801	5:35:00	37	A7	0.114	ZDBp806	DM0-growth
1802	5:40:00	37	A7	0.1142	ZDBp806	DM0-growth
1803	5:45:00	37	A7	0.1185	ZDBp806	DM0-growth
1804	5:50:00	37	A7	0.1204	ZDBp806	DM0-growth
1805	5:55:00	37	A7	0.1202	ZDBp806	DM0-growth
1806	6:00:00	37	A7	0.1256	ZDBp806	DM0-growth
1807	6:05:00	37	A7	0.1268	ZDBp806	DM0-growth
1808	6:10:00	37	A7	0.1293	ZDBp806	DM0-growth
1809	6:15:00	37	A7	0.1317	ZDBp806	DM0-growth
1810	6:20:00	37	A7	0.1369	ZDBp806	DM0-growth
1811	6:25:00	37	A7	0.1375	ZDBp806	DM0-growth
1812	6:30:00	37	A7	0.1428	ZDBp806	DM0-growth
1813	6:35:00	37	A7	0.1467	ZDBp806	DM0-growth
1814	6:40:00	37	A7	0.1476	ZDBp806	DM0-growth
1815	6:45:00	37	A7	0.1508	ZDBp806	DM0-growth
1816	6:50:00	37	A7	0.153	ZDBp806	DM0-growth
1817	6:55:00	37	A7	0.1572	ZDBp806	DM0-growth
1818	7:00:00	37	A7	0.1582	ZDBp806	DM0-growth
1819	7:05:00	37	A7	0.1629	ZDBp806	DM0-growth
1820	7:10:00	37	A7	0.1637	ZDBp806	DM0-growth
1821	7:15:00	37	A7	0.1676	ZDBp806	DM0-growth
1822	7:20:00	37	A7	0.1694	ZDBp806	DM0-growth
1823	7:25:00	37	A7	0.1699	ZDBp806	DM0-growth
1824	7:30:00	37	A7	0.1743	ZDBp806	DM0-growth
1825	7:35:00	37	A7	0.1779	ZDBp806	DM0-growth
1826	7:40:00	37	A7	0.181	ZDBp806	DM0-growth
1827	7:45:00	37	A7	0.1808	ZDBp806	DM0-growth
1828	7:50:00	37	A7	0.184	ZDBp806	DM0-growth
1829	7:55:00	37	A7	0.188	ZDBp806	DM0-growth
1830	8:00:00	37	A7	0.1895	ZDBp806	DM0-growth
1831	8:05:00	37	A7	0.192	ZDBp806	DM0-growth
1832	8:10:00	37	A7	0.1936	ZDBp806	DM0-growth
1833	8:15:00	37	A7	0.1973	ZDBp806	DM0-growth
1834	8:20:00	37	A7	0.1991	ZDBp806	DM0-growth
1835	8:25:00	37	A7	0.2019	ZDBp806	DM0-growth
1836	8:30:00	37	A7	0.2029	ZDBp806	DM0-growth
1837	8:35:00	37	A7	0.2072	ZDBp806	DM0-growth
1838	8:40:00	37	A7	0.2084	ZDBp806	DM0-growth
1839	8:45:00	37	A7	0.2113	ZDBp806	DM0-growth
1840	8:50:00	37	A7	0.2156	ZDBp806	DM0-growth
1841	8:55:00	37	A7	0.2172	ZDBp806	DM0-growth
1842	9:00:00	37	A7	0.2201	ZDBp806	DM0-growth
1843	9:05:00	37	A7	0.2259	ZDBp806	DM0-growth
1844	9:10:00	37	A7	0.234	ZDBp806	DM0-growth
1845	9:15:00	37	A7	0.2455	ZDBp806	DM0-growth
1846	9:20:00	37	A7	0.2494	ZDBp806	DM0-growth
1847	9:25:00	37	A7	0.2532	ZDBp806	DM0-growth
1848	9:30:00	37	A7	0.2545	ZDBp806	DM0-growth
1849	9:35:00	37	A7	0.2568	ZDBp806	DM0-growth
1850	9:40:00	37	A7	0.2564	ZDBp806	DM0-growth
1851	9:45:00	37	A7	0.2556	ZDBp806	DM0-growth
1852	9:50:00	37	A7	0.2557	ZDBp806	DM0-growth
1853	9:55:00	37	A7	0.2566	ZDBp806	DM0-growth
1854	10:00:00	37	A7	0.2557	ZDBp806	DM0-growth
1855	10:05:00	37	A7	0.2548	ZDBp806	DM0-growth
1856	10:10:00	37	A7	0.2558	ZDBp806	DM0-growth
1857	10:15:00	37	A7	0.2564	ZDBp806	DM0-growth
1858	10:20:00	37	A7	0.2533	ZDBp806	DM0-growth
1859	10:25:00	37	A7	0.2537	ZDBp806	DM0-growth
1860	10:30:00	37	A7	0.2519	ZDBp806	DM0-growth
1861	10:35:00	37	A7	0.2527	ZDBp806	DM0-growth
1862	10:40:00	37	A7	0.2531	ZDBp806	DM0-growth
1863	10:45:00	37	A7	0.2503	ZDBp806	DM0-growth
1864	10:50:00	37	A7	0.2493	ZDBp806	DM0-growth
1865	10:55:00	37	A7	0.2496	ZDBp806	DM0-growth
1866	11:00:00	37	A7	0.2488	ZDBp806	DM0-growth
1867	11:05:00	37	A7	0.2494	ZDBp806	DM0-growth
1868	11:10:00	37	A7	0.2486	ZDBp806	DM0-growth
1869	11:15:00	37	A7	0.248	ZDBp806	DM0-growth
1870	11:20:00	37	A7	0.2452	ZDBp806	DM0-growth
1871	11:25:00	37	A7	0.2467	ZDBp806	DM0-growth
1872	11:30:00	37	A7	0.2478	ZDBp806	DM0-growth
1873	11:35:00	37	A7	0.2473	ZDBp806	DM0-growth
1874	11:40:00	37	A7	0.2459	ZDBp806	DM0-growth
1875	11:45:00	37	A7	0.2455	ZDBp806	DM0-growth
1876	11:50:00	37	A7	0.2468	ZDBp806	DM0-growth
1877	11:55:00	37	A7	0.2443	ZDBp806	DM0-growth
1878	12:00:00	37	A7	0.2448	ZDBp806	DM0-growth
1879	12:05:00	37	A7	0.2464	ZDBp806	DM0-growth
1880	12:10:00	37	A7	0.2447	ZDBp806	DM0-growth
1881	12:15:00	37	A7	0.2437	ZDBp806	DM0-growth
1882	12:20:00	37	A7	0.2457	ZDBp806	DM0-growth
1883	12:25:00	37	A7	0.2447	ZDBp806	DM0-growth
1884	12:30:00	37	A7	0.2448	ZDBp806	DM0-growth
1885	12:35:00	37	A7	0.2436	ZDBp806	DM0-growth
1886	12:40:00	37	A7	0.2447	ZDBp806	DM0-growth
1887	12:45:00	37	A7	0.2462	ZDBp806	DM0-growth
1888	12:50:00	37	A7	0.2457	ZDBp806	DM0-growth
1889	12:55:00	37	A7	0.2477	ZDBp806	DM0-growth
1890	13:00:00	37	A7	0.2482	ZDBp806	DM0-growth
1891	13:05:00	37	A7	0.2503	ZDBp806	DM0-growth
1892	13:10:00	37	A7	0.2508	ZDBp806	DM0-growth
1893	13:15:00	37	A7	0.2489	ZDBp806	DM0-growth
1894	13:20:00	37	A7	0.2524	ZDBp806	DM0-growth
1895	13:25:00	37	A7	0.2526	ZDBp806	DM0-growth
1896	13:30:00	37	A7	0.2507	ZDBp806	DM0-growth
1897	13:35:00	37	A7	0.2536	ZDBp806	DM0-growth
1898	13:40:00	37	A7	0.2528	ZDBp806	DM0-growth
1899	13:45:00	37	A7	0.2563	ZDBp806	DM0-growth
1900	13:50:00	37	A7	0.2571	ZDBp806	DM0-growth
1901	13:55:00	37	A7	0.2568	ZDBp806	DM0-growth
1902	14:00:00	37	A7	0.2585	ZDBp806	DM0-growth
1903	14:05:00	37	A7	0.2606	ZDBp806	DM0-growth
1904	14:10:00	37	A7	0.2607	ZDBp806	DM0-growth
1905	14:15:00	37	A7	0.2592	ZDBp806	DM0-growth
1906	14:20:00	37	A7	0.2605	ZDBp806	DM0-growth
1907	14:25:00	37	A7	0.2606	ZDBp806	DM0-growth
1908	14:30:00	37	A7	0.2616	ZDBp806	DM0-growth
1909	14:35:00	37	A7	0.2645	ZDBp806	DM0-growth
1910	14:40:00	37	A7	0.2655	ZDBp806	DM0-growth
1911	14:45:00	37	A7	0.266	ZDBp806	DM0-growth
1912	14:50:00	37	A7	0.2689	ZDBp806	DM0-growth
1913	14:55:00	37	A7	0.2707	ZDBp806	DM0-growth
1914	15:00:00	37	A7	0.2704	ZDBp806	DM0-growth
1915	15:05:00	37	A7	0.2712	ZDBp806	DM0-growth
1916	15:10:00	37	A7	0.2739	ZDBp806	DM0-growth
1917	15:15:00	37	A7	0.2731	ZDBp806	DM0-growth
1918	15:20:00	37	A7	0.2743	ZDBp806	DM0-growth
1919	15:25:00	37	A7	0.2752	ZDBp806	DM0-growth
1920	15:30:00	37	A7	0.2769	ZDBp806	DM0-growth
1921	15:35:00	37	A7	0.2787	ZDBp806	DM0-growth
1922	15:40:00	37	A7	0.2785	ZDBp806	DM0-growth
1923	15:45:00	37	A7	0.2818	ZDBp806	DM0-growth
1924	15:50:00	37	A7	0.2823	ZDBp806	DM0-growth
1925	15:55:00	37	A7	0.2821	ZDBp806	DM0-growth
1926	16:00:00	37	A7	0.2836	ZDBp806	DM0-growth
1927	16:05:00	37	A7	0.2832	ZDBp806	DM0-growth
1928	16:10:00	37	A7	0.2862	ZDBp806	DM0-growth
1929	16:15:00	37	A7	0.2885	ZDBp806	DM0-growth
1930	16:20:00	37	A7	0.2905	ZDBp806	DM0-growth
1931	16:25:00	37	A7	0.2909	ZDBp806	DM0-growth
1932	16:30:00	37	A7	0.2939	ZDBp806	DM0-growth
1933	16:35:00	37	A7	0.2943	ZDBp806	DM0-growth
1934	16:40:00	37	A7	0.295	ZDBp806	DM0-growth
1935	16:45:00	37	A7	0.2951	ZDBp806	DM0-growth
1936	16:50:00	37	A7	0.3001	ZDBp806	DM0-growth
1937	16:55:00	37	A7	0.3037	ZDBp806	DM0-growth
1938	17:00:00	37	A7	0.304	ZDBp806	DM0-growth
1939	17:05:00	37	A7	0.3045	ZDBp806	DM0-growth
1940	17:10:00	37	A7	0.3085	ZDBp806	DM0-growth
1941	17:15:00	37	A7	0.3123	ZDBp806	DM0-growth
1942	17:20:00	37	A7	0.3115	ZDBp806	DM0-growth
1943	17:25:00	37	A7	0.3151	ZDBp806	DM0-growth
1944	17:30:00	37	A7	0.3169	ZDBp806	DM0-growth
1945	17:35:00	37	A7	0.3182	ZDBp806	DM0-growth
1946	17:40:00	37	A7	0.3175	ZDBp806	DM0-growth
1947	17:45:00	37	A7	0.3185	ZDBp806	DM0-growth
1948	17:50:00	37	A7	0.3216	ZDBp806	DM0-growth
1949	17:55:00	37	A7	0.3238	ZDBp806	DM0-growth
1950	18:00:00	37	A7	0.3244	ZDBp806	DM0-growth
1951	18:05:00	37	A7	0.3307	ZDBp806	DM0-growth
1952	18:10:00	37	A7	0.329	ZDBp806	DM0-growth
1953	18:15:00	37	A7	0.3335	ZDBp806	DM0-growth
1954	18:20:00	37	A7	0.3325	ZDBp806	DM0-growth
1955	18:25:00	37	A7	0.3339	ZDBp806	DM0-growth
1956	18:30:00	37	A7	0.3337	ZDBp806	DM0-growth
1957	18:35:00	37	A7	0.3376	ZDBp806	DM0-growth
1958	18:40:00	37	A7	0.3414	ZDBp806	DM0-growth
1959	18:45:00	37	A7	0.3446	ZDBp806	DM0-growth
1960	18:50:00	37	A7	0.3449	ZDBp806	DM0-growth
1961	18:55:00	37	A7	0.3466	ZDBp806	DM0-growth
1962	19:00:00	37	A7	0.3441	ZDBp806	DM0-growth
1963	19:05:00	37	A7	0.3445	ZDBp806	DM0-growth
1964	19:10:00	37	A7	0.3482	ZDBp806	DM0-growth
1965	19:15:00	37	A7	0.3486	ZDBp806	DM0-growth
1966	19:20:00	37	A7	0.3499	ZDBp806	DM0-growth
1967	19:25:00	37	A7	0.3507	ZDBp806	DM0-growth
1968	19:30:00	37	A7	0.3525	ZDBp806	DM0-growth
1969	19:35:00	37	A7	0.356	ZDBp806	DM0-growth
1970	19:40:00	37	A7	0.3555	ZDBp806	DM0-growth
1971	19:45:00	37	A7	0.3558	ZDBp806	DM0-growth
1972	19:50:00	37	A7	0.3538	ZDBp806	DM0-growth
1973	19:55:00	37	A7	0.3554	ZDBp806	DM0-growth
1974	20:00:00	37	A7	0.3602	ZDBp806	DM0-growth
1975	20:05:00	37	A7	0.3588	ZDBp806	DM0-growth
1976	20:10:00	37	A7	0.3646	ZDBp806	DM0-growth
1977	20:15:00	37	A7	0.3655	ZDBp806	DM0-growth
1978	20:20:00	37	A7	0.3674	ZDBp806	DM0-growth
1979	20:25:00	37	A7	0.3698	ZDBp806	DM0-growth
1980	20:30:00	37	A7	0.3693	ZDBp806	DM0-growth
1981	20:35:00	37	A7	0.3676	ZDBp806	DM0-growth
1982	20:40:00	37	A7	0.3706	ZDBp806	DM0-growth
1983	20:45:00	37	A7	0.3678	ZDBp806	DM0-growth
1984	20:50:00	37	A7	0.3706	ZDBp806	DM0-growth
1985	20:55:00	37	A7	0.3739	ZDBp806	DM0-growth
1986	21:00:00	37	A7	0.3754	ZDBp806	DM0-growth
1987	21:05:00	37	A7	0.3756	ZDBp806	DM0-growth
1988	21:10:00	37	A7	0.3765	ZDBp806	DM0-growth
1989	21:15:00	37	A7	0.3806	ZDBp806	DM0-growth
1990	21:20:00	37	A7	0.3814	ZDBp806	DM0-growth
1991	21:25:00	37	A7	0.3799	ZDBp806	DM0-growth
1992	21:30:00	37	A7	0.3849	ZDBp806	DM0-growth
1993	21:35:00	37	A7	0.3788	ZDBp806	DM0-growth
1994	21:40:00	37	A7	0.3827	ZDBp806	DM0-growth
1995	21:45:00	37	A7	0.3833	ZDBp806	DM0-growth
1996	21:50:00	37	A7	0.384	ZDBp806	DM0-growth
1997	21:55:00	37	A7	0.3847	ZDBp806	DM0-growth
1998	22:00:00	37	A7	0.3828	ZDBp806	DM0-growth
[truncated: 53,489 more rows]
