# Supplementary material for: Genomic and phenotypic evolution of Escherichia coli in a novel citrate-only resource environment
Source: eLife. 2020 May 29;9:e55414. doi: 10.7554/eLife.55414 (PMC7299349; doi:10.7554/eLife.55414)
Supplement: Figure 7—source data 1. [file elife-55414-fig7-data1.csv]

	Time	Temperature	Well	OD420	Name	Experiment
0	0:00:00	37	A1	0.006	Blank	DM0-growth
1	0:10:00	37	A1	0.004883333	Blank	DM0-growth
2	0:20:00	37	A1	0.0051	Blank	DM0-growth
3	0:30:00	37	A1	0.006733333	Blank	DM0-growth
4	0:40:00	37	A1	0.004983333	Blank	DM0-growth
5	0:50:00	37	A1	0.004633333	Blank	DM0-growth
6	1:00:00	37	A1	0.00665	Blank	DM0-growth
7	1:10:00	37	A1	0.004866667	Blank	DM0-growth
8	1:20:00	37	A1	0.00415	Blank	DM0-growth
9	1:30:00	37	A1	0.0042	Blank	DM0-growth
10	1:40:00	37	A1	0.004683333	Blank	DM0-growth
11	1:50:00	37	A1	0.0042	Blank	DM0-growth
12	2:00:00	37	A1	0.004766667	Blank	DM0-growth
13	2:10:00	37	A1	0.003583333	Blank	DM0-growth
14	2:20:00	37	A1	0.003583333	Blank	DM0-growth
15	2:30:00	37	A1	0.003216667	Blank	DM0-growth
16	2:40:00	37	A1	0.002766667	Blank	DM0-growth
17	2:50:00	37	A1	0.005033333	Blank	DM0-growth
18	3:00:00	37	A1	0.001966667	Blank	DM0-growth
19	3:10:00	37	A1	0.002566667	Blank	DM0-growth
20	3:20:00	37	A1	0.002583333	Blank	DM0-growth
21	3:30:00	37	A1	0.003033333	Blank	DM0-growth
22	3:40:00	37	A1	0.0024	Blank	DM0-growth
23	3:50:00	37	A1	0.002483333	Blank	DM0-growth
24	4:00:00	37	A1	0.00235	Blank	DM0-growth
25	4:10:00	37	A1	0.002566667	Blank	DM0-growth
26	4:20:00	37	A1	0.002033333	Blank	DM0-growth
27	4:30:00	37	A1	0.001916667	Blank	DM0-growth
28	4:40:00	37	A1	0.002283333	Blank	DM0-growth
29	4:50:00	37	A1	0.002083333	Blank	DM0-growth
30	5:00:00	37	A1	0.00275	Blank	DM0-growth
31	5:10:00	37	A1	0.003016667	Blank	DM0-growth
32	5:20:00	37	A1	0.00175	Blank	DM0-growth
33	5:30:00	37	A1	0.00305	Blank	DM0-growth
34	5:40:00	37	A1	0.002	Blank	DM0-growth
35	5:50:00	37	A1	0.00265	Blank	DM0-growth
36	6:00:00	37	A1	0.001733333	Blank	DM0-growth
37	6:10:00	37	A1	0.00195	Blank	DM0-growth
38	6:20:00	37	A1	0.00235	Blank	DM0-growth
39	6:30:00	37	A1	0.0018	Blank	DM0-growth
40	6:40:00	37	A1	0.002283333	Blank	DM0-growth
41	6:50:00	37	A1	0.001916667	Blank	DM0-growth
42	7:00:00	37	A1	0.002716667	Blank	DM0-growth
43	7:10:00	37	A1	0.002333333	Blank	DM0-growth
44	7:20:00	37	A1	0.002833333	Blank	DM0-growth
45	7:30:00	37	A1	0.00295	Blank	DM0-growth
46	7:40:00	37	A1	0.003233333	Blank	DM0-growth
47	7:50:00	37	A1	0.001883333	Blank	DM0-growth
48	8:00:00	37	A1	0.002666667	Blank	DM0-growth
49	8:10:00	37	A1	0.002733333	Blank	DM0-growth
50	8:20:00	37	A1	0.00295	Blank	DM0-growth
51	8:30:00	37	A1	0.0022	Blank	DM0-growth
52	8:40:00	37	A1	0.002766667	Blank	DM0-growth
53	8:50:00	37	A1	0.002516667	Blank	DM0-growth
54	9:00:00	37	A1	0.0027	Blank	DM0-growth
55	9:10:00	37	A1	0.003133333	Blank	DM0-growth
56	9:20:00	37	A1	0.002683333	Blank	DM0-growth
57	9:30:00	37	A1	0.002316667	Blank	DM0-growth
58	9:40:00	37	A1	0.002783333	Blank	DM0-growth
59	9:50:00	37	A1	0.002933333	Blank	DM0-growth
60	10:00:00	37	A1	0.003266667	Blank	DM0-growth
61	10:10:00	37	A1	0.00145	Blank	DM0-growth
62	10:20:00	37	A1	0.002516667	Blank	DM0-growth
63	10:30:00	37	A1	0.002316667	Blank	DM0-growth
64	10:40:00	37	A1	0.002933333	Blank	DM0-growth
65	10:50:00	37	A1	0.002316667	Blank	DM0-growth
66	11:00:00	37	A1	0.002	Blank	DM0-growth
67	11:10:00	37	A1	0.002283333	Blank	DM0-growth
68	11:20:00	37	A1	0.00275	Blank	DM0-growth
69	11:30:00	37	A1	0.002833333	Blank	DM0-growth
70	11:40:00	37	A1	0.001816667	Blank	DM0-growth
71	11:50:00	37	A1	0.002366667	Blank	DM0-growth
72	12:00:00	37	A1	0.002766667	Blank	DM0-growth
73	12:10:00	37	A1	0.002583333	Blank	DM0-growth
74	12:20:00	37	A1	0.002683333	Blank	DM0-growth
75	12:30:00	37	A1	0.0027	Blank	DM0-growth
76	12:40:00	37	A1	0.002083333	Blank	DM0-growth
77	12:50:00	37	A1	0.003066667	Blank	DM0-growth
78	13:00:00	37	A1	0.002216667	Blank	DM0-growth
79	13:10:00	37	A1	0.00185	Blank	DM0-growth
80	13:20:00	37	A1	0.002116667	Blank	DM0-growth
81	13:30:00	37	A1	0.00285	Blank	DM0-growth
82	13:40:00	37	A1	0.0015	Blank	DM0-growth
83	13:50:00	37	A1	0.002666667	Blank	DM0-growth
84	14:00:00	37	A1	0.001883333	Blank	DM0-growth
85	14:10:00	37	A1	0.001883333	Blank	DM0-growth
86	14:20:00	37	A1	0.002883333	Blank	DM0-growth
87	14:30:00	37	A1	0.002533333	Blank	DM0-growth
88	14:40:00	37	A1	0.00155	Blank	DM0-growth
89	14:50:00	37	A1	0.001616667	Blank	DM0-growth
90	15:00:00	37	A1	0.001816667	Blank	DM0-growth
91	15:10:00	37	A1	0.0021	Blank	DM0-growth
92	15:20:00	37	A1	0.0021	Blank	DM0-growth
93	15:30:00	37	A1	0.0016	Blank	DM0-growth
94	15:40:00	37	A1	0.001816667	Blank	DM0-growth
95	15:50:00	37	A1	0.001283333	Blank	DM0-growth
96	16:00:00	37	A1	0.001566667	Blank	DM0-growth
97	16:10:00	37	A1	0.0019	Blank	DM0-growth
98	16:20:00	37	A1	0.00235	Blank	DM0-growth
99	16:30:00	37	A1	0.001183333	Blank	DM0-growth
100	16:40:00	37	A1	0.0014	Blank	DM0-growth
101	16:50:00	37	A1	0.0015	Blank	DM0-growth
102	17:00:00	37	A1	0.002066667	Blank	DM0-growth
103	17:10:00	37	A1	0.00135	Blank	DM0-growth
104	17:20:00	37	A1	0.0014	Blank	DM0-growth
105	17:30:00	37	A1	0.002	Blank	DM0-growth
106	17:40:00	37	A1	0.001516667	Blank	DM0-growth
107	17:50:00	37	A1	0.00175	Blank	DM0-growth
108	18:00:00	37	A1	0.001416667	Blank	DM0-growth
109	18:10:00	37	A1	0.00115	Blank	DM0-growth
110	18:20:00	37	A1	0.002266667	Blank	DM0-growth
111	18:30:00	37	A1	0.0019	Blank	DM0-growth
112	18:40:00	37	A1	0.0017	Blank	DM0-growth
113	18:50:00	37	A1	0.0018	Blank	DM0-growth
114	19:00:00	37	A1	0.001883333	Blank	DM0-growth
115	19:10:00	37	A1	0.001633333	Blank	DM0-growth
116	19:20:00	37	A1	0.0017	Blank	DM0-growth
117	19:30:00	37	A1	0.0004	Blank	DM0-growth
118	19:40:00	37	A1	0.00165	Blank	DM0-growth
119	19:50:00	37	A1	0.001266667	Blank	DM0-growth
120	20:00:00	37	A1	0.001383333	Blank	DM0-growth
121	20:10:00	37	A1	0.00175	Blank	DM0-growth
122	20:20:00	37	A1	0.0015	Blank	DM0-growth
123	20:30:00	37	A1	0.001883333	Blank	DM0-growth
124	20:40:00	37	A1	0.001833333	Blank	DM0-growth
125	20:50:00	37	A1	0.001516667	Blank	DM0-growth
126	21:00:00	37	A1	0.001716667	Blank	DM0-growth
127	21:10:00	37	A1	0.001366667	Blank	DM0-growth
128	21:20:00	37	A1	0.001533333	Blank	DM0-growth
129	21:30:00	37	A1	0.001416667	Blank	DM0-growth
130	21:40:00	37	A1	0.001633333	Blank	DM0-growth
131	21:50:00	37	A1	0.000833333	Blank	DM0-growth
132	22:00:00	37	A1	0.001983333	Blank	DM0-growth
133	22:10:00	37	A1	0.001566667	Blank	DM0-growth
134	22:20:00	37	A1	0.001633333	Blank	DM0-growth
135	22:30:00	37	A1	0.002133333	Blank	DM0-growth
136	22:40:00	37	A1	0.001816667	Blank	DM0-growth
137	22:50:00	37	A1	0.001983333	Blank	DM0-growth
138	23:00:00	37	A1	0.001483333	Blank	DM0-growth
139	23:10:00	37	A1	0.001383333	Blank	DM0-growth
140	23:20:00	37	A1	0.0019	Blank	DM0-growth
141	23:30:00	37	A1	0.0018	Blank	DM0-growth
142	23:40:00	37	A1	0.001833333	Blank	DM0-growth
143	23:50:00	37	A1	0.001616667	Blank	DM0-growth
144	24:00:00	37	A1	0.001866667	Blank	DM0-growth
145	24:10:00	37	A1	0.002016667	Blank	DM0-growth
146	24:20:00	37	A1	0.002083333	Blank	DM0-growth
147	24:30:00	37	A1	0.001383333	Blank	DM0-growth
148	24:40:00	37	A1	0.001533333	Blank	DM0-growth
149	24:50:00	37	A1	0.001783333	Blank	DM0-growth
150	25:00:00	37	A1	0.001466667	Blank	DM0-growth
151	25:10:00	37	A1	0.00175	Blank	DM0-growth
152	25:20:00	37	A1	0.001733333	Blank	DM0-growth
153	25:30:00	37	A1	0.0017	Blank	DM0-growth
154	25:40:00	37	A1	0.00135	Blank	DM0-growth
155	25:50:00	37	A1	0.001833333	Blank	DM0-growth
156	26:00:00	37	A1	0.001116667	Blank	DM0-growth
157	26:10:00	37	A1	0.001516667	Blank	DM0-growth
158	26:20:00	37	A1	0.001433333	Blank	DM0-growth
159	26:30:00	37	A1	0.001483333	Blank	DM0-growth
160	26:40:00	37	A1	0.0019	Blank	DM0-growth
161	26:50:00	37	A1	0.001416667	Blank	DM0-growth
162	27:00:00	37	A1	0.001266667	Blank	DM0-growth
163	27:10:00	37	A1	0.0015	Blank	DM0-growth
164	27:20:00	37	A1	0.0017	Blank	DM0-growth
165	27:30:00	37	A1	0.0013	Blank	DM0-growth
166	27:40:00	37	A1	0.001566667	Blank	DM0-growth
167	27:50:00	37	A1	0.00135	Blank	DM0-growth
168	28:00:00	37	A1	0.001816667	Blank	DM0-growth
169	28:10:00	37	A1	0.001	Blank	DM0-growth
170	28:20:00	37	A1	0.001683333	Blank	DM0-growth
171	28:30:00	37	A1	-0.000583333	Blank	DM0-growth
172	28:40:00	37	A1	0.00105	Blank	DM0-growth
173	28:50:00	37	A1	0.001183333	Blank	DM0-growth
174	29:00:00	37	A1	0.001016667	Blank	DM0-growth
175	29:10:00	37	A1	0.001783333	Blank	DM0-growth
176	29:20:00	37	A1	0.001866667	Blank	DM0-growth
177	29:30:00	37	A1	0.000866667	Blank	DM0-growth
178	29:40:00	37	A1	0.001683333	Blank	DM0-growth
179	29:50:00	37	A1	0.001333333	Blank	DM0-growth
180	30:00:00	37	A1	0.001366667	Blank	DM0-growth
181	30:10:00	37	A1	0.001683333	Blank	DM0-growth
182	30:20:00	37	A1	0.001983333	Blank	DM0-growth
183	30:30:00	37	A1	0.001216667	Blank	DM0-growth
184	30:40:00	37	A1	0.00175	Blank	DM0-growth
185	30:50:00	37	A1	0.001033333	Blank	DM0-growth
186	31:00:00	37	A1	0.001283333	Blank	DM0-growth
187	31:10:00	37	A1	0.001366667	Blank	DM0-growth
188	31:20:00	37	A1	0.001083333	Blank	DM0-growth
189	31:30:00	37	A1	0.001866667	Blank	DM0-growth
190	31:40:00	37	A1	0.001716667	Blank	DM0-growth
191	31:50:00	37	A1	0.001933333	Blank	DM0-growth
192	32:00:00	37	A1	0.00125	Blank	DM0-growth
193	32:10:00	37	A1	0.00175	Blank	DM0-growth
194	32:20:00	37	A1	0.00105	Blank	DM0-growth
195	32:30:00	37	A1	0.00725	Blank	DM0-growth
196	32:40:00	37	A1	0.012083333	Blank	DM0-growth
197	32:50:00	37	A1	0.0013	Blank	DM0-growth
198	33:00:00	37	A1	0.001266667	Blank	DM0-growth
199	33:10:00	37	A1	0.002033333	Blank	DM0-growth
200	33:20:00	37	A1	0.001266667	Blank	DM0-growth
201	33:30:00	37	A1	0.00155	Blank	DM0-growth
202	33:40:00	37	A1	0.00175	Blank	DM0-growth
203	33:50:00	37	A1	0.001983333	Blank	DM0-growth
204	34:00:00	37	A1	0.00175	Blank	DM0-growth
205	34:10:00	37	A1	0.00095	Blank	DM0-growth
206	34:20:00	37	A1	0.001366667	Blank	DM0-growth
207	34:30:00	37	A1	0.001316667	Blank	DM0-growth
208	34:40:00	37	A1	0.0017	Blank	DM0-growth
209	34:50:00	37	A1	0.001316667	Blank	DM0-growth
210	35:00:00	37	A1	0.00145	Blank	DM0-growth
211	35:10:00	37	A1	0.0017	Blank	DM0-growth
212	35:20:00	37	A1	0.001933333	Blank	DM0-growth
213	35:30:00	37	A1	0.001716667	Blank	DM0-growth
214	35:40:00	37	A1	0.001433333	Blank	DM0-growth
215	35:50:00	37	A1	0.001066667	Blank	DM0-growth
216	36:00:00	37	A1	0.001583333	Blank	DM0-growth
217	36:10:00	37	A1	0.00155	Blank	DM0-growth
218	36:20:00	37	A1	0.0017	Blank	DM0-growth
219	36:30:00	37	A1	-0.000466667	Blank	DM0-growth
220	36:40:00	37	A1	0.001183333	Blank	DM0-growth
221	36:50:00	37	A1	0.001033333	Blank	DM0-growth
222	37:00:00	37	A1	0.001016667	Blank	DM0-growth
223	37:10:00	37	A1	0.0012	Blank	DM0-growth
224	37:20:00	37	A1	0.001333333	Blank	DM0-growth
225	37:30:00	37	A1	0.00215	Blank	DM0-growth
226	37:40:00	37	A1	-0.00035	Blank	DM0-growth
227	37:50:00	37	A1	0.0012	Blank	DM0-growth
228	38:00:00	37	A1	0.00125	Blank	DM0-growth
229	38:10:00	37	A1	0.001433333	Blank	DM0-growth
230	38:20:00	37	A1	0.001833333	Blank	DM0-growth
231	38:30:00	37	A1	0.001666667	Blank	DM0-growth
232	38:40:00	37	A1	0.0017	Blank	DM0-growth
233	38:50:00	37	A1	0.001233333	Blank	DM0-growth
234	39:00:00	37	A1	0.00125	Blank	DM0-growth
235	39:10:00	37	A1	0.001	Blank	DM0-growth
236	39:20:00	37	A1	0.00085	Blank	DM0-growth
237	39:30:00	37	A1	0.001566667	Blank	DM0-growth
238	39:40:00	37	A1	0.00155	Blank	DM0-growth
239	39:50:00	37	A1	0.001483333	Blank	DM0-growth
240	40:00:00	37	A1	0.00105	Blank	DM0-growth
241	40:10:00	37	A1	0.001633333	Blank	DM0-growth
242	40:20:00	37	A1	0.001516667	Blank	DM0-growth
243	40:30:00	37	A1	0.001583333	Blank	DM0-growth
244	40:40:00	37	A1	0.001733333	Blank	DM0-growth
245	40:50:00	37	A1	0.001533333	Blank	DM0-growth
246	41:00:00	37	A1	0.0014	Blank	DM0-growth
247	41:10:00	37	A1	0.000583333	Blank	DM0-growth
248	41:20:00	37	A1	0.0012	Blank	DM0-growth
249	41:30:00	37	A1	0.0012	Blank	DM0-growth
250	41:40:00	37	A1	0.001383333	Blank	DM0-growth
251	41:50:00	37	A1	0.001416667	Blank	DM0-growth
252	42:00:00	37	A1	0.0017	Blank	DM0-growth
253	42:10:00	37	A1	0.001083333	Blank	DM0-growth
254	42:20:00	37	A1	0.000983333	Blank	DM0-growth
255	42:30:00	37	A1	0.000883333	Blank	DM0-growth
256	42:40:00	37	A1	0.001133333	Blank	DM0-growth
257	42:50:00	37	A1	0.001166667	Blank	DM0-growth
258	43:00:00	37	A1	0.001433333	Blank	DM0-growth
259	43:10:00	37	A1	0.001216667	Blank	DM0-growth
260	43:20:00	37	A1	0.001416667	Blank	DM0-growth
261	43:30:00	37	A1	0.00175	Blank	DM0-growth
262	43:40:00	37	A1	0.0012	Blank	DM0-growth
263	43:50:00	37	A1	0.001533333	Blank	DM0-growth
264	44:00:00	37	A1	0.000866667	Blank	DM0-growth
265	44:10:00	37	A1	0.00115	Blank	DM0-growth
266	44:20:00	37	A1	0.0013	Blank	DM0-growth
267	44:30:00	37	A1	0.001516667	Blank	DM0-growth
268	44:40:00	37	A1	-0.00015	Blank	DM0-growth
269	44:50:00	37	A1	0.001783333	Blank	DM0-growth
270	45:00:00	37	A1	0.0012	Blank	DM0-growth
271	45:10:00	37	A1	0.000516667	Blank	DM0-growth
272	45:20:00	37	A1	0.00125	Blank	DM0-growth
273	45:30:00	37	A1	-0.001016667	Blank	DM0-growth
274	45:40:00	37	A1	0.00155	Blank	DM0-growth
275	45:50:00	37	A1	0.001133333	Blank	DM0-growth
276	46:00:00	37	A1	0.0009	Blank	DM0-growth
277	46:10:00	37	A1	0.000766667	Blank	DM0-growth
278	46:20:00	37	A1	0.000816667	Blank	DM0-growth
279	46:30:00	37	A1	0.001183333	Blank	DM0-growth
280	46:40:00	37	A1	0.001433333	Blank	DM0-growth
281	46:50:00	37	A1	0.0015	Blank	DM0-growth
282	47:00:00	37	A1	0.001066667	Blank	DM0-growth
283	47:10:00	37	A1	0.001433333	Blank	DM0-growth
284	47:20:00	37	A1	0.001666667	Blank	DM0-growth
285	47:30:00	37	A1	0.001416667	Blank	DM0-growth
286	47:40:00	37	A1	0.000816667	Blank	DM0-growth
287	47:50:00	37	A1	0.0012	Blank	DM0-growth
288	48:00:00	37	A1	0.001433333	Blank	DM0-growth
289	0:00:00	37	A2	-0.0035	Blank	DM0-growth
290	0:10:00	37	A2	-0.002316667	Blank	DM0-growth
291	0:20:00	37	A2	-0.0023	Blank	DM0-growth
292	0:30:00	37	A2	-0.002366667	Blank	DM0-growth
293	0:40:00	37	A2	-0.002116667	Blank	DM0-growth
294	0:50:00	37	A2	-0.002066667	Blank	DM0-growth
295	1:00:00	37	A2	-0.00235	Blank	DM0-growth
296	1:10:00	37	A2	-0.002133333	Blank	DM0-growth
297	1:20:00	37	A2	-0.00195	Blank	DM0-growth
298	1:30:00	37	A2	-0.002	Blank	DM0-growth
299	1:40:00	37	A2	-0.002116667	Blank	DM0-growth
300	1:50:00	37	A2	-0.002	Blank	DM0-growth
301	2:00:00	37	A2	-0.002133333	Blank	DM0-growth
302	2:10:00	37	A2	-0.001816667	Blank	DM0-growth
303	2:20:00	37	A2	-0.001816667	Blank	DM0-growth
304	2:30:00	37	A2	-0.001683333	Blank	DM0-growth
305	2:40:00	37	A2	-0.001633333	Blank	DM0-growth
306	2:50:00	37	A2	-0.002166667	Blank	DM0-growth
307	3:00:00	37	A2	-0.001533333	Blank	DM0-growth
308	3:10:00	37	A2	-0.001633333	Blank	DM0-growth
309	3:20:00	37	A2	-0.001716667	Blank	DM0-growth
310	3:30:00	37	A2	-0.001666667	Blank	DM0-growth
311	3:40:00	37	A2	-0.0016	Blank	DM0-growth
312	3:50:00	37	A2	-0.001616667	Blank	DM0-growth
313	4:00:00	37	A2	-0.00155	Blank	DM0-growth
314	4:10:00	37	A2	-0.001733333	Blank	DM0-growth
315	4:20:00	37	A2	-0.001566667	Blank	DM0-growth
316	4:30:00	37	A2	-0.001583333	Blank	DM0-growth
317	4:40:00	37	A2	-0.001616667	Blank	DM0-growth
318	4:50:00	37	A2	-0.001416667	Blank	DM0-growth
319	5:00:00	37	A2	-0.00175	Blank	DM0-growth
320	5:10:00	37	A2	-0.001783333	Blank	DM0-growth
321	5:20:00	37	A2	-0.00135	Blank	DM0-growth
322	5:30:00	37	A2	-0.00175	Blank	DM0-growth
323	5:40:00	37	A2	-0.0015	Blank	DM0-growth
324	5:50:00	37	A2	-0.00175	Blank	DM0-growth
325	6:00:00	37	A2	-0.001666667	Blank	DM0-growth
326	6:10:00	37	A2	-0.00175	Blank	DM0-growth
327	6:20:00	37	A2	-0.00185	Blank	DM0-growth
328	6:30:00	37	A2	-0.0017	Blank	DM0-growth
329	6:40:00	37	A2	-0.001716667	Blank	DM0-growth
330	6:50:00	37	A2	-0.001783333	Blank	DM0-growth
331	7:00:00	37	A2	-0.001883333	Blank	DM0-growth
332	7:10:00	37	A2	-0.001666667	Blank	DM0-growth
333	7:20:00	37	A2	-0.001766667	Blank	DM0-growth
334	7:30:00	37	A2	-0.00195	Blank	DM0-growth
335	7:40:00	37	A2	-0.001966667	Blank	DM0-growth
336	7:50:00	37	A2	-0.001516667	Blank	DM0-growth
337	8:00:00	37	A2	-0.001733333	Blank	DM0-growth
338	8:10:00	37	A2	-0.001766667	Blank	DM0-growth
339	8:20:00	37	A2	-0.00195	Blank	DM0-growth
340	8:30:00	37	A2	-0.0016	Blank	DM0-growth
341	8:40:00	37	A2	-0.001733333	Blank	DM0-growth
342	8:50:00	37	A2	-0.001783333	Blank	DM0-growth
343	9:00:00	37	A2	-0.0017	Blank	DM0-growth
344	9:10:00	37	A2	-0.001866667	Blank	DM0-growth
345	9:20:00	37	A2	-0.001716667	Blank	DM0-growth
346	9:30:00	37	A2	-0.001583333	Blank	DM0-growth
347	9:40:00	37	A2	-0.001716667	Blank	DM0-growth
348	9:50:00	37	A2	-0.001766667	Blank	DM0-growth
349	10:00:00	37	A2	-0.001833333	Blank	DM0-growth
350	10:10:00	37	A2	-0.00245	Blank	DM0-growth
351	10:20:00	37	A2	-0.001783333	Blank	DM0-growth
352	10:30:00	37	A2	-0.001683333	Blank	DM0-growth
353	10:40:00	37	A2	-0.001666667	Blank	DM0-growth
354	10:50:00	37	A2	-0.001683333	Blank	DM0-growth
355	11:00:00	37	A2	-0.0019	Blank	DM0-growth
356	11:10:00	37	A2	-0.001516667	Blank	DM0-growth
357	11:20:00	37	A2	-0.00175	Blank	DM0-growth
358	11:30:00	37	A2	-0.001766667	Blank	DM0-growth
359	11:40:00	37	A2	-0.001583333	Blank	DM0-growth
360	11:50:00	37	A2	-0.001633333	Blank	DM0-growth
361	12:00:00	37	A2	-0.001733333	Blank	DM0-growth
362	12:10:00	37	A2	-0.001716667	Blank	DM0-growth
363	12:20:00	37	A2	-0.001816667	Blank	DM0-growth
364	12:30:00	37	A2	-0.0017	Blank	DM0-growth
365	12:40:00	37	A2	-0.001616667	Blank	DM0-growth
366	12:50:00	37	A2	-0.001933333	Blank	DM0-growth
367	13:00:00	37	A2	-0.001483333	Blank	DM0-growth
368	13:10:00	37	A2	-0.00145	Blank	DM0-growth
369	13:20:00	37	A2	-0.001583333	Blank	DM0-growth
370	13:30:00	37	A2	-0.00195	Blank	DM0-growth
371	13:40:00	37	A2	-0.0014	Blank	DM0-growth
372	13:50:00	37	A2	-0.001733333	Blank	DM0-growth
373	14:00:00	37	A2	-0.001516667	Blank	DM0-growth
374	14:10:00	37	A2	-0.001516667	Blank	DM0-growth
375	14:20:00	37	A2	-0.001816667	Blank	DM0-growth
376	14:30:00	37	A2	-0.001766667	Blank	DM0-growth
377	14:40:00	37	A2	-0.00155	Blank	DM0-growth
378	14:50:00	37	A2	-0.001583333	Blank	DM0-growth
379	15:00:00	37	A2	-0.001483333	Blank	DM0-growth
380	15:10:00	37	A2	-0.0016	Blank	DM0-growth
381	15:20:00	37	A2	-0.0016	Blank	DM0-growth
382	15:30:00	37	A2	-0.0015	Blank	DM0-growth
383	15:40:00	37	A2	-0.001383333	Blank	DM0-growth
384	15:50:00	37	A2	-0.001416667	Blank	DM0-growth
385	16:00:00	37	A2	-0.001533333	Blank	DM0-growth
386	16:10:00	37	A2	-0.0015	Blank	DM0-growth
387	16:20:00	37	A2	-0.00175	Blank	DM0-growth
388	16:30:00	37	A2	-0.001516667	Blank	DM0-growth
389	16:40:00	37	A2	-0.0015	Blank	DM0-growth
390	16:50:00	37	A2	-0.0015	Blank	DM0-growth
391	17:00:00	37	A2	-0.001733333	Blank	DM0-growth
392	17:10:00	37	A2	-0.00155	Blank	DM0-growth
393	17:20:00	37	A2	-0.0015	Blank	DM0-growth
394	17:30:00	37	A2	-0.0015	Blank	DM0-growth
395	17:40:00	37	A2	-0.001483333	Blank	DM0-growth
396	17:50:00	37	A2	-0.00195	Blank	DM0-growth
397	18:00:00	37	A2	-0.001483333	Blank	DM0-growth
398	18:10:00	37	A2	-0.00145	Blank	DM0-growth
399	18:20:00	37	A2	-0.001733333	Blank	DM0-growth
400	18:30:00	37	A2	-0.0015	Blank	DM0-growth
401	18:40:00	37	A2	-0.0015	Blank	DM0-growth
402	18:50:00	37	A2	-0.0016	Blank	DM0-growth
403	19:00:00	37	A2	-0.001616667	Blank	DM0-growth
404	19:10:00	37	A2	-0.001466667	Blank	DM0-growth
405	19:20:00	37	A2	-0.0016	Blank	DM0-growth
406	19:30:00	37	A2	-0.0026	Blank	DM0-growth
407	19:40:00	37	A2	-0.00155	Blank	DM0-growth
408	19:50:00	37	A2	-0.001433333	Blank	DM0-growth
409	20:00:00	37	A2	-0.001416667	Blank	DM0-growth
410	20:10:00	37	A2	-0.00155	Blank	DM0-growth
411	20:20:00	37	A2	-0.0014	Blank	DM0-growth
412	20:30:00	37	A2	-0.001616667	Blank	DM0-growth
413	20:40:00	37	A2	-0.001566667	Blank	DM0-growth
414	20:50:00	37	A2	-0.001583333	Blank	DM0-growth
415	21:00:00	37	A2	-0.001583333	Blank	DM0-growth
416	21:10:00	37	A2	-0.001433333	Blank	DM0-growth
417	21:20:00	37	A2	-0.001366667	Blank	DM0-growth
418	21:30:00	37	A2	-0.001583333	Blank	DM0-growth
419	21:40:00	37	A2	-0.001566667	Blank	DM0-growth
420	21:50:00	37	A2	-0.002266667	Blank	DM0-growth
421	22:00:00	37	A2	-0.001516667	Blank	DM0-growth
422	22:10:00	37	A2	-0.001533333	Blank	DM0-growth
423	22:20:00	37	A2	-0.001666667	Blank	DM0-growth
424	22:30:00	37	A2	-0.001566667	Blank	DM0-growth
425	22:40:00	37	A2	-0.001583333	Blank	DM0-growth
426	22:50:00	37	A2	-0.001716667	Blank	DM0-growth
427	23:00:00	37	A2	-0.001516667	Blank	DM0-growth
428	23:10:00	37	A2	-0.001516667	Blank	DM0-growth
429	23:20:00	37	A2	-0.0016	Blank	DM0-growth
430	23:30:00	37	A2	-0.0016	Blank	DM0-growth
431	23:40:00	37	A2	-0.001766667	Blank	DM0-growth
432	23:50:00	37	A2	-0.001583333	Blank	DM0-growth
433	24:00:00	37	A2	-0.001633333	Blank	DM0-growth
434	24:10:00	37	A2	-0.001783333	Blank	DM0-growth
435	24:20:00	37	A2	-0.001616667	Blank	DM0-growth
436	24:30:00	37	A2	-0.001416667	Blank	DM0-growth
437	24:40:00	37	A2	-0.001566667	Blank	DM0-growth
438	24:50:00	37	A2	-0.001616667	Blank	DM0-growth
439	25:00:00	37	A2	-0.001533333	Blank	DM0-growth
440	25:10:00	37	A2	-0.00155	Blank	DM0-growth
441	25:20:00	37	A2	-0.001466667	Blank	DM0-growth
442	25:30:00	37	A2	-0.0015	Blank	DM0-growth
443	25:40:00	37	A2	-0.00145	Blank	DM0-growth
444	25:50:00	37	A2	-0.001566667	Blank	DM0-growth
445	26:00:00	37	A2	-0.001383333	Blank	DM0-growth
446	26:10:00	37	A2	-0.001583333	Blank	DM0-growth
447	26:20:00	37	A2	-0.001566667	Blank	DM0-growth
448	26:30:00	37	A2	-0.001516667	Blank	DM0-growth
449	26:40:00	37	A2	-0.0016	Blank	DM0-growth
450	26:50:00	37	A2	-0.001583333	Blank	DM0-growth
451	27:00:00	37	A2	-0.001533333	Blank	DM0-growth
452	27:10:00	37	A2	-0.0015	Blank	DM0-growth
453	27:20:00	37	A2	-0.0017	Blank	DM0-growth
454	27:30:00	37	A2	-0.0016	Blank	DM0-growth
455	27:40:00	37	A2	-0.001633333	Blank	DM0-growth
456	27:50:00	37	A2	-0.00145	Blank	DM0-growth
457	28:00:00	37	A2	-0.001683333	Blank	DM0-growth
458	28:10:00	37	A2	-0.0014	Blank	DM0-growth
459	28:20:00	37	A2	-0.001616667	Blank	DM0-growth
460	28:30:00	37	A2	-0.003483333	Blank	DM0-growth
461	28:40:00	37	A2	-0.00145	Blank	DM0-growth
462	28:50:00	37	A2	-0.001516667	Blank	DM0-growth
463	29:00:00	37	A2	-0.001683333	Blank	DM0-growth
464	29:10:00	37	A2	-0.001516667	Blank	DM0-growth
465	29:20:00	37	A2	-0.001633333	Blank	DM0-growth
466	29:30:00	37	A2	-0.001433333	Blank	DM0-growth
467	29:40:00	37	A2	-0.001616667	Blank	DM0-growth
468	29:50:00	37	A2	-0.001666667	Blank	DM0-growth
469	30:00:00	37	A2	-0.001833333	Blank	DM0-growth
470	30:10:00	37	A2	-0.001616667	Blank	DM0-growth
471	30:20:00	37	A2	-0.001716667	Blank	DM0-growth
472	30:30:00	37	A2	-0.001483333	Blank	DM0-growth
473	30:40:00	37	A2	-0.00185	Blank	DM0-growth
474	30:50:00	37	A2	-0.001566667	Blank	DM0-growth
475	31:00:00	37	A2	-0.001516667	Blank	DM0-growth
476	31:10:00	37	A2	-0.001533333	Blank	DM0-growth
477	31:20:00	37	A2	-0.001516667	Blank	DM0-growth
478	31:30:00	37	A2	-0.001733333	Blank	DM0-growth
479	31:40:00	37	A2	-0.001483333	Blank	DM0-growth
480	31:50:00	37	A2	-0.001666667	Blank	DM0-growth
481	32:00:00	37	A2	-0.00155	Blank	DM0-growth
482	32:10:00	37	A2	-0.00175	Blank	DM0-growth
483	32:20:00	37	A2	-0.00175	Blank	DM0-growth
484	32:30:00	37	A2	-0.00275	Blank	DM0-growth
485	32:40:00	37	A2	-0.003616667	Blank	DM0-growth
486	32:50:00	37	A2	-0.0014	Blank	DM0-growth
487	33:00:00	37	A2	-0.001333333	Blank	DM0-growth
488	33:10:00	37	A2	-0.001666667	Blank	DM0-growth
489	33:20:00	37	A2	-0.001633333	Blank	DM0-growth
490	33:30:00	37	A2	-0.00175	Blank	DM0-growth
491	33:40:00	37	A2	-0.00165	Blank	DM0-growth
492	33:50:00	37	A2	-0.001716667	Blank	DM0-growth
493	34:00:00	37	A2	-0.00175	Blank	DM0-growth
494	34:10:00	37	A2	-0.00165	Blank	DM0-growth
495	34:20:00	37	A2	-0.001633333	Blank	DM0-growth
496	34:30:00	37	A2	-0.001483333	Blank	DM0-growth
497	34:40:00	37	A2	-0.0016	Blank	DM0-growth
498	34:50:00	37	A2	-0.001583333	Blank	DM0-growth
499	35:00:00	37	A2	-0.00165	Blank	DM0-growth
500	35:10:00	37	A2	-0.0017	Blank	DM0-growth
501	35:20:00	37	A2	-0.001666667	Blank	DM0-growth
502	35:30:00	37	A2	-0.001583333	Blank	DM0-growth
503	35:40:00	37	A2	-0.001566667	Blank	DM0-growth
504	35:50:00	37	A2	-0.002233333	Blank	DM0-growth
505	36:00:00	37	A2	-0.001516667	Blank	DM0-growth
506	36:10:00	37	A2	-0.00165	Blank	DM0-growth
507	36:20:00	37	A2	-0.0016	Blank	DM0-growth
508	36:30:00	37	A2	-0.003666667	Blank	DM0-growth
509	36:40:00	37	A2	-0.001616667	Blank	DM0-growth
510	36:50:00	37	A2	-0.001466667	Blank	DM0-growth
511	37:00:00	37	A2	-0.001583333	Blank	DM0-growth
512	37:10:00	37	A2	-0.0015	Blank	DM0-growth
513	37:20:00	37	A2	-0.001666667	Blank	DM0-growth
514	37:30:00	37	A2	-0.00185	Blank	DM0-growth
515	37:40:00	37	A2	-0.00285	Blank	DM0-growth
516	37:50:00	37	A2	-0.0016	Blank	DM0-growth
517	38:00:00	37	A2	-0.00155	Blank	DM0-growth
518	38:10:00	37	A2	-0.001666667	Blank	DM0-growth
519	38:20:00	37	A2	-0.001666667	Blank	DM0-growth
520	38:30:00	37	A2	-0.001633333	Blank	DM0-growth
521	38:40:00	37	A2	-0.0017	Blank	DM0-growth
522	38:50:00	37	A2	-0.001566667	Blank	DM0-growth
523	39:00:00	37	A2	-0.00155	Blank	DM0-growth
524	39:10:00	37	A2	-0.0015	Blank	DM0-growth
525	39:20:00	37	A2	-0.00145	Blank	DM0-growth
526	39:30:00	37	A2	-0.001533333	Blank	DM0-growth
527	39:40:00	37	A2	-0.00165	Blank	DM0-growth
528	39:50:00	37	A2	-0.001616667	Blank	DM0-growth
529	40:00:00	37	A2	-0.00155	Blank	DM0-growth
530	40:10:00	37	A2	-0.001666667	Blank	DM0-growth
531	40:20:00	37	A2	-0.001683333	Blank	DM0-growth
532	40:30:00	37	A2	-0.001716667	Blank	DM0-growth
533	40:40:00	37	A2	-0.001666667	Blank	DM0-growth
534	40:50:00	37	A2	-0.001666667	Blank	DM0-growth
535	41:00:00	37	A2	-0.0017	Blank	DM0-growth
536	41:10:00	37	A2	-0.002916667	Blank	DM0-growth
537	41:20:00	37	A2	-0.0016	Blank	DM0-growth
538	41:30:00	37	A2	-0.0015	Blank	DM0-growth
539	41:40:00	37	A2	-0.001616667	Blank	DM0-growth
540	41:50:00	37	A2	-0.001683333	Blank	DM0-growth
541	42:00:00	37	A2	-0.0017	Blank	DM0-growth
542	42:10:00	37	A2	-0.001516667	Blank	DM0-growth
543	42:20:00	37	A2	-0.001516667	Blank	DM0-growth
544	42:30:00	37	A2	-0.001516667	Blank	DM0-growth
545	42:40:00	37	A2	-0.001566667	Blank	DM0-growth
546	42:50:00	37	A2	-0.001533333	Blank	DM0-growth
547	43:00:00	37	A2	-0.001466667	Blank	DM0-growth
548	43:10:00	37	A2	-0.001583333	Blank	DM0-growth
549	43:20:00	37	A2	-0.001683333	Blank	DM0-growth
550	43:30:00	37	A2	-0.00165	Blank	DM0-growth
551	43:40:00	37	A2	-0.0023	Blank	DM0-growth
552	43:50:00	37	A2	-0.001666667	Blank	DM0-growth
553	44:00:00	37	A2	-0.001333333	Blank	DM0-growth
554	44:10:00	37	A2	-0.00155	Blank	DM0-growth
555	44:20:00	37	A2	-0.0016	Blank	DM0-growth
556	44:30:00	37	A2	-0.001683333	Blank	DM0-growth
557	44:40:00	37	A2	-0.00325	Blank	DM0-growth
558	44:50:00	37	A2	-0.001716667	Blank	DM0-growth
559	45:00:00	37	A2	-0.0016	Blank	DM0-growth
560	45:10:00	37	A2	-0.002483333	Blank	DM0-growth
561	45:20:00	37	A2	-0.00155	Blank	DM0-growth
562	45:30:00	37	A2	-0.003716667	Blank	DM0-growth
563	45:40:00	37	A2	-0.00155	Blank	DM0-growth
564	45:50:00	37	A2	-0.001566667	Blank	DM0-growth
565	46:00:00	37	A2	-0.0015	Blank	DM0-growth
566	46:10:00	37	A2	-0.001433333	Blank	DM0-growth
567	46:20:00	37	A2	-0.001383333	Blank	DM0-growth
568	46:30:00	37	A2	-0.001516667	Blank	DM0-growth
569	46:40:00	37	A2	-0.001666667	Blank	DM0-growth
570	46:50:00	37	A2	-0.0017	Blank	DM0-growth
571	47:00:00	37	A2	-0.001533333	Blank	DM0-growth
572	47:10:00	37	A2	-0.001566667	Blank	DM0-growth
573	47:20:00	37	A2	-0.001633333	Blank	DM0-growth
574	47:30:00	37	A2	-0.001583333	Blank	DM0-growth
575	47:40:00	37	A2	-0.001483333	Blank	DM0-growth
576	47:50:00	37	A2	-0.0016	Blank	DM0-growth
577	48:00:00	37	A2	-0.001566667	Blank	DM0-growth
578	0:00:00	37	A3	-0.0031	Blank	DM0-growth
579	0:10:00	37	A3	-0.001816667	Blank	DM0-growth
580	0:20:00	37	A3	-0.0018	Blank	DM0-growth
581	0:30:00	37	A3	-0.002266667	Blank	DM0-growth
582	0:40:00	37	A3	-0.001916667	Blank	DM0-growth
583	0:50:00	37	A3	-0.001766667	Blank	DM0-growth
584	1:00:00	37	A3	-0.00225	Blank	DM0-growth
585	1:10:00	37	A3	-0.001833333	Blank	DM0-growth
586	1:20:00	37	A3	-0.00165	Blank	DM0-growth
587	1:30:00	37	A3	-0.0016	Blank	DM0-growth
588	1:40:00	37	A3	-0.001816667	Blank	DM0-growth
589	1:50:00	37	A3	-0.0017	Blank	DM0-growth
590	2:00:00	37	A3	-0.001733333	Blank	DM0-growth
591	2:10:00	37	A3	-0.001616667	Blank	DM0-growth
592	2:20:00	37	A3	-0.001416667	Blank	DM0-growth
593	2:30:00	37	A3	-0.001483333	Blank	DM0-growth
594	2:40:00	37	A3	-0.001333333	Blank	DM0-growth
595	2:50:00	37	A3	-0.001966667	Blank	DM0-growth
596	3:00:00	37	A3	-0.001233333	Blank	DM0-growth
597	3:10:00	37	A3	-0.001333333	Blank	DM0-growth
598	3:20:00	37	A3	-0.001316667	Blank	DM0-growth
599	3:30:00	37	A3	-0.001466667	Blank	DM0-growth
600	3:40:00	37	A3	-0.0013	Blank	DM0-growth
601	3:50:00	37	A3	-0.001416667	Blank	DM0-growth
602	4:00:00	37	A3	-0.00145	Blank	DM0-growth
603	4:10:00	37	A3	-0.001433333	Blank	DM0-growth
604	4:20:00	37	A3	-0.001266667	Blank	DM0-growth
605	4:30:00	37	A3	-0.001183333	Blank	DM0-growth
606	4:40:00	37	A3	-0.001316667	Blank	DM0-growth
607	4:50:00	37	A3	-0.001316667	Blank	DM0-growth
608	5:00:00	37	A3	-0.00145	Blank	DM0-growth
609	5:10:00	37	A3	-0.001483333	Blank	DM0-growth
610	5:20:00	37	A3	-0.00115	Blank	DM0-growth
611	5:30:00	37	A3	-0.00145	Blank	DM0-growth
612	5:40:00	37	A3	-0.0011	Blank	DM0-growth
613	5:50:00	37	A3	-0.00095	Blank	DM0-growth
614	6:00:00	37	A3	-0.000566667	Blank	DM0-growth
615	6:10:00	37	A3	-0.00045	Blank	DM0-growth
616	6:20:00	37	A3	-0.00045	Blank	DM0-growth
617	6:30:00	37	A3	-0.0004	Blank	DM0-growth
618	6:40:00	37	A3	-0.000516667	Blank	DM0-growth
619	6:50:00	37	A3	-0.000383333	Blank	DM0-growth
620	7:00:00	37	A3	-0.000583333	Blank	DM0-growth
621	7:10:00	37	A3	-0.000766667	Blank	DM0-growth
622	7:20:00	37	A3	-0.001066667	Blank	DM0-growth
623	7:30:00	37	A3	-0.00115	Blank	DM0-growth
624	7:40:00	37	A3	-0.001366667	Blank	DM0-growth
625	7:50:00	37	A3	-0.001116667	Blank	DM0-growth
626	8:00:00	37	A3	-0.001333333	Blank	DM0-growth
627	8:10:00	37	A3	-0.001466667	Blank	DM0-growth
628	8:20:00	37	A3	-0.00145	Blank	DM0-growth
629	8:30:00	37	A3	-0.0013	Blank	DM0-growth
630	8:40:00	37	A3	-0.001533333	Blank	DM0-growth
631	8:50:00	37	A3	-0.001383333	Blank	DM0-growth
632	9:00:00	37	A3	-0.0015	Blank	DM0-growth
633	9:10:00	37	A3	-0.001566667	Blank	DM0-growth
634	9:20:00	37	A3	-0.001516667	Blank	DM0-growth
635	9:30:00	37	A3	-0.001483333	Blank	DM0-growth
636	9:40:00	37	A3	-0.001516667	Blank	DM0-growth
637	9:50:00	37	A3	-0.001566667	Blank	DM0-growth
638	10:00:00	37	A3	-0.001633333	Blank	DM0-growth
639	10:10:00	37	A3	-0.00215	Blank	DM0-growth
640	10:20:00	37	A3	-0.001483333	Blank	DM0-growth
641	10:30:00	37	A3	-0.001483333	Blank	DM0-growth
642	10:40:00	37	A3	-0.001666667	Blank	DM0-growth
643	10:50:00	37	A3	-0.001383333	Blank	DM0-growth
644	11:00:00	37	A3	-0.0017	Blank	DM0-growth
645	11:10:00	37	A3	-0.001416667	Blank	DM0-growth
646	11:20:00	37	A3	-0.00155	Blank	DM0-growth
647	11:30:00	37	A3	-0.001566667	Blank	DM0-growth
648	11:40:00	37	A3	-0.001383333	Blank	DM0-growth
649	11:50:00	37	A3	-0.001433333	Blank	DM0-growth
650	12:00:00	37	A3	-0.001533333	Blank	DM0-growth
651	12:10:00	37	A3	-0.001516667	Blank	DM0-growth
652	12:20:00	37	A3	-0.001516667	Blank	DM0-growth
653	12:30:00	37	A3	-0.0016	Blank	DM0-growth
654	12:40:00	37	A3	-0.001416667	Blank	DM0-growth
655	12:50:00	37	A3	-0.001533333	Blank	DM0-growth
656	13:00:00	37	A3	-0.001583333	Blank	DM0-growth
657	13:10:00	37	A3	-0.00135	Blank	DM0-growth
658	13:20:00	37	A3	-0.001483333	Blank	DM0-growth
659	13:30:00	37	A3	-0.00155	Blank	DM0-growth
660	13:40:00	37	A3	-0.0013	Blank	DM0-growth
661	13:50:00	37	A3	-0.001633333	Blank	DM0-growth
662	14:00:00	37	A3	-0.001416667	Blank	DM0-growth
663	14:10:00	37	A3	-0.001516667	Blank	DM0-growth
664	14:20:00	37	A3	-0.001716667	Blank	DM0-growth
665	14:30:00	37	A3	-0.001666667	Blank	DM0-growth
666	14:40:00	37	A3	-0.00155	Blank	DM0-growth
667	14:50:00	37	A3	-0.001483333	Blank	DM0-growth
668	15:00:00	37	A3	-0.001583333	Blank	DM0-growth
669	15:10:00	37	A3	-0.0016	Blank	DM0-growth
670	15:20:00	37	A3	-0.0016	Blank	DM0-growth
671	15:30:00	37	A3	-0.0014	Blank	DM0-growth
672	15:40:00	37	A3	-0.001483333	Blank	DM0-growth
673	15:50:00	37	A3	-0.001416667	Blank	DM0-growth
674	16:00:00	37	A3	-0.001533333	Blank	DM0-growth
675	16:10:00	37	A3	-0.0016	Blank	DM0-growth
676	16:20:00	37	A3	-0.00165	Blank	DM0-growth
677	16:30:00	37	A3	-0.001416667	Blank	DM0-growth
678	16:40:00	37	A3	-0.0015	Blank	DM0-growth
679	16:50:00	37	A3	-0.0014	Blank	DM0-growth
680	17:00:00	37	A3	-0.001533333	Blank	DM0-growth
681	17:10:00	37	A3	-0.00145	Blank	DM0-growth
682	17:20:00	37	A3	-0.0015	Blank	DM0-growth
683	17:30:00	37	A3	-0.0016	Blank	DM0-growth
684	17:40:00	37	A3	-0.001483333	Blank	DM0-growth
685	17:50:00	37	A3	-0.00195	Blank	DM0-growth
686	18:00:00	37	A3	-0.001483333	Blank	DM0-growth
687	18:10:00	37	A3	-0.00145	Blank	DM0-growth
688	18:20:00	37	A3	-0.001733333	Blank	DM0-growth
689	18:30:00	37	A3	-0.0017	Blank	DM0-growth
690	18:40:00	37	A3	-0.0016	Blank	DM0-growth
691	18:50:00	37	A3	-0.0016	Blank	DM0-growth
692	19:00:00	37	A3	-0.001616667	Blank	DM0-growth
693	19:10:00	37	A3	-0.001566667	Blank	DM0-growth
694	19:20:00	37	A3	-0.0015	Blank	DM0-growth
695	19:30:00	37	A3	-0.0028	Blank	DM0-growth
696	19:40:00	37	A3	-0.00155	Blank	DM0-growth
697	19:50:00	37	A3	-0.001533333	Blank	DM0-growth
698	20:00:00	37	A3	-0.001516667	Blank	DM0-growth
699	20:10:00	37	A3	-0.00165	Blank	DM0-growth
700	20:20:00	37	A3	-0.0016	Blank	DM0-growth
701	20:30:00	37	A3	-0.001616667	Blank	DM0-growth
702	20:40:00	37	A3	-0.001666667	Blank	DM0-growth
703	20:50:00	37	A3	-0.001583333	Blank	DM0-growth
704	21:00:00	37	A3	-0.001583333	Blank	DM0-growth
705	21:10:00	37	A3	-0.001633333	Blank	DM0-growth
706	21:20:00	37	A3	-0.001566667	Blank	DM0-growth
707	21:30:00	37	A3	-0.001583333	Blank	DM0-growth
708	21:40:00	37	A3	-0.001666667	Blank	DM0-growth
709	21:50:00	37	A3	-0.002366667	Blank	DM0-growth
710	22:00:00	37	A3	-0.001716667	Blank	DM0-growth
711	22:10:00	37	A3	-0.001633333	Blank	DM0-growth
712	22:20:00	37	A3	-0.001566667	Blank	DM0-growth
713	22:30:00	37	A3	-0.001766667	Blank	DM0-growth
714	22:40:00	37	A3	-0.001683333	Blank	DM0-growth
715	22:50:00	37	A3	-0.001616667	Blank	DM0-growth
716	23:00:00	37	A3	-0.001616667	Blank	DM0-growth
717	23:10:00	37	A3	-0.001516667	Blank	DM0-growth
718	23:20:00	37	A3	-0.0017	Blank	DM0-growth
719	23:30:00	37	A3	-0.0016	Blank	DM0-growth
720	23:40:00	37	A3	-0.001866667	Blank	DM0-growth
721	23:50:00	37	A3	-0.001683333	Blank	DM0-growth
722	24:00:00	37	A3	-0.001633333	Blank	DM0-growth
723	24:10:00	37	A3	-0.001783333	Blank	DM0-growth
724	24:20:00	37	A3	-0.001816667	Blank	DM0-growth
725	24:30:00	37	A3	-0.001616667	Blank	DM0-growth
726	24:40:00	37	A3	-0.001566667	Blank	DM0-growth
727	24:50:00	37	A3	-0.001716667	Blank	DM0-growth
728	25:00:00	37	A3	-0.001633333	Blank	DM0-growth
729	25:10:00	37	A3	-0.00165	Blank	DM0-growth
730	25:20:00	37	A3	-0.001766667	Blank	DM0-growth
731	25:30:00	37	A3	-0.0014	Blank	DM0-growth
732	25:40:00	37	A3	-0.00155	Blank	DM0-growth
733	25:50:00	37	A3	-0.001666667	Blank	DM0-growth
734	26:00:00	37	A3	-0.001483333	Blank	DM0-growth
735	26:10:00	37	A3	-0.001583333	Blank	DM0-growth
736	26:20:00	37	A3	-0.001566667	Blank	DM0-growth
737	26:30:00	37	A3	-0.001416667	Blank	DM0-growth
738	26:40:00	37	A3	-0.0016	Blank	DM0-growth
739	26:50:00	37	A3	-0.001383333	Blank	DM0-growth
740	27:00:00	37	A3	-0.001533333	Blank	DM0-growth
741	27:10:00	37	A3	-0.0016	Blank	DM0-growth
742	27:20:00	37	A3	-0.0015	Blank	DM0-growth
743	27:30:00	37	A3	-0.0011	Blank	DM0-growth
744	27:40:00	37	A3	-0.001433333	Blank	DM0-growth
745	27:50:00	37	A3	-0.00135	Blank	DM0-growth
746	28:00:00	37	A3	-0.001083333	Blank	DM0-growth
747	28:10:00	37	A3	-0.0009	Blank	DM0-growth
748	28:20:00	37	A3	-0.001216667	Blank	DM0-growth
749	28:30:00	37	A3	-0.003083333	Blank	DM0-growth
750	28:40:00	37	A3	-0.00115	Blank	DM0-growth
751	28:50:00	37	A3	-0.001216667	Blank	DM0-growth
752	29:00:00	37	A3	-0.001383333	Blank	DM0-growth
753	29:10:00	37	A3	-0.001616667	Blank	DM0-growth
754	29:20:00	37	A3	-0.001533333	Blank	DM0-growth
755	29:30:00	37	A3	-0.000833333	Blank	DM0-growth
756	29:40:00	37	A3	-0.001316667	Blank	DM0-growth
757	29:50:00	37	A3	-0.001066667	Blank	DM0-growth
758	30:00:00	37	A3	-0.000533333	Blank	DM0-growth
759	30:10:00	37	A3	-0.001316667	Blank	DM0-growth
760	30:20:00	37	A3	-0.001516667	Blank	DM0-growth
761	30:30:00	37	A3	-0.001383333	Blank	DM0-growth
762	30:40:00	37	A3	-0.00075	Blank	DM0-growth
763	30:50:00	37	A3	-0.001166667	Blank	DM0-growth
764	31:00:00	37	A3	-0.001516667	Blank	DM0-growth
765	31:10:00	37	A3	-0.001533333	Blank	DM0-growth
766	31:20:00	37	A3	-0.001016667	Blank	DM0-growth
767	31:30:00	37	A3	-0.001733333	Blank	DM0-growth
768	31:40:00	37	A3	-0.001783333	Blank	DM0-growth
769	31:50:00	37	A3	-0.001766667	Blank	DM0-growth
770	32:00:00	37	A3	-0.00155	Blank	DM0-growth
771	32:10:00	37	A3	-0.00145	Blank	DM0-growth
772	32:20:00	37	A3	-0.00135	Blank	DM0-growth
773	32:30:00	37	A3	-0.00295	Blank	DM0-growth
774	32:40:00	37	A3	-0.003516667	Blank	DM0-growth
775	32:50:00	37	A3	-0.0017	Blank	DM0-growth
776	33:00:00	37	A3	-0.001833333	Blank	DM0-growth
777	33:10:00	37	A3	-0.001866667	Blank	DM0-growth
778	33:20:00	37	A3	-0.001433333	Blank	DM0-growth
779	33:30:00	37	A3	-0.00115	Blank	DM0-growth
780	33:40:00	37	A3	-0.00155	Blank	DM0-growth
781	33:50:00	37	A3	-0.001916667	Blank	DM0-growth
782	34:00:00	37	A3	-0.00145	Blank	DM0-growth
783	34:10:00	37	A3	-0.00075	Blank	DM0-growth
784	34:20:00	37	A3	-0.001533333	Blank	DM0-growth
785	34:30:00	37	A3	-0.001683333	Blank	DM0-growth
786	34:40:00	37	A3	-0.0018	Blank	DM0-growth
787	34:50:00	37	A3	-0.001683333	Blank	DM0-growth
788	35:00:00	37	A3	-0.00145	Blank	DM0-growth
789	35:10:00	37	A3	-0.0018	Blank	DM0-growth
790	35:20:00	37	A3	-0.001966667	Blank	DM0-growth
791	35:30:00	37	A3	-0.001983333	Blank	DM0-growth
792	35:40:00	37	A3	-0.001866667	Blank	DM0-growth
793	35:50:00	37	A3	-0.002333333	Blank	DM0-growth
794	36:00:00	37	A3	-0.001816667	Blank	DM0-growth
795	36:10:00	37	A3	-0.00175	Blank	DM0-growth
796	36:20:00	37	A3	-0.0019	Blank	DM0-growth
797	36:30:00	37	A3	-0.003866667	Blank	DM0-growth
798	36:40:00	37	A3	-0.001716667	Blank	DM0-growth
799	36:50:00	37	A3	-0.001666667	Blank	DM0-growth
800	37:00:00	37	A3	-0.001383333	Blank	DM0-growth
801	37:10:00	37	A3	-0.0018	Blank	DM0-growth
802	37:20:00	37	A3	-0.001766667	Blank	DM0-growth
803	37:30:00	37	A3	-0.00205	Blank	DM0-growth
804	37:40:00	37	A3	-0.00325	Blank	DM0-growth
805	37:50:00	37	A3	-0.0016	Blank	DM0-growth
806	38:00:00	37	A3	-0.00175	Blank	DM0-growth
807	38:10:00	37	A3	-0.001866667	Blank	DM0-growth
808	38:20:00	37	A3	-0.001966667	Blank	DM0-growth
809	38:30:00	37	A3	-0.001933333	Blank	DM0-growth
810	38:40:00	37	A3	-0.0019	Blank	DM0-growth
811	38:50:00	37	A3	-0.001866667	Blank	DM0-growth
812	39:00:00	37	A3	-0.00175	Blank	DM0-growth
813	39:10:00	37	A3	-0.0018	Blank	DM0-growth
814	39:20:00	37	A3	-0.00165	Blank	DM0-growth
815	39:30:00	37	A3	-0.001933333	Blank	DM0-growth
816	39:40:00	37	A3	-0.00185	Blank	DM0-growth
817	39:50:00	37	A3	-0.001916667	Blank	DM0-growth
818	40:00:00	37	A3	-0.00165	Blank	DM0-growth
819	40:10:00	37	A3	-0.001866667	Blank	DM0-growth
820	40:20:00	37	A3	-0.001883333	Blank	DM0-growth
821	40:30:00	37	A3	-0.001916667	Blank	DM0-growth
822	40:40:00	37	A3	-0.002066667	Blank	DM0-growth
823	40:50:00	37	A3	-0.001866667	Blank	DM0-growth
824	41:00:00	37	A3	-0.0018	Blank	DM0-growth
825	41:10:00	37	A3	-0.003016667	Blank	DM0-growth
826	41:20:00	37	A3	-0.0018	Blank	DM0-growth
827	41:30:00	37	A3	-0.0018	Blank	DM0-growth
828	41:40:00	37	A3	-0.001816667	Blank	DM0-growth
829	41:50:00	37	A3	-0.001883333	Blank	DM0-growth
830	42:00:00	37	A3	-0.0019	Blank	DM0-growth
831	42:10:00	37	A3	-0.001816667	Blank	DM0-growth
832	42:20:00	37	A3	-0.001716667	Blank	DM0-growth
833	42:30:00	37	A3	-0.001616667	Blank	DM0-growth
834	42:40:00	37	A3	-0.001766667	Blank	DM0-growth
835	42:50:00	37	A3	-0.001733333	Blank	DM0-growth
836	43:00:00	37	A3	-0.001866667	Blank	DM0-growth
837	43:10:00	37	A3	-0.001883333	Blank	DM0-growth
838	43:20:00	37	A3	-0.001783333	Blank	DM0-growth
839	43:30:00	37	A3	-0.00195	Blank	DM0-growth
840	43:40:00	37	A3	-0.0024	Blank	DM0-growth
841	43:50:00	37	A3	-0.001766667	Blank	DM0-growth
842	44:00:00	37	A3	-0.001633333	Blank	DM0-growth
843	44:10:00	37	A3	-0.00175	Blank	DM0-growth
844	44:20:00	37	A3	-0.0018	Blank	DM0-growth
845	44:30:00	37	A3	-0.001783333	Blank	DM0-growth
846	44:40:00	37	A3	-0.00335	Blank	DM0-growth
847	44:50:00	37	A3	-0.001916667	Blank	DM0-growth
848	45:00:00	37	A3	-0.0018	Blank	DM0-growth
849	45:10:00	37	A3	-0.002583333	Blank	DM0-growth
850	45:20:00	37	A3	-0.00175	Blank	DM0-growth
851	45:30:00	37	A3	-0.004016667	Blank	DM0-growth
852	45:40:00	37	A3	-0.00195	Blank	DM0-growth
853	45:50:00	37	A3	-0.001666667	Blank	DM0-growth
854	46:00:00	37	A3	-0.0016	Blank	DM0-growth
855	46:10:00	37	A3	-0.001633333	Blank	DM0-growth
856	46:20:00	37	A3	-0.001683333	Blank	DM0-growth
857	46:30:00	37	A3	-0.001716667	Blank	DM0-growth
858	46:40:00	37	A3	-0.001866667	Blank	DM0-growth
859	46:50:00	37	A3	-0.0018	Blank	DM0-growth
860	47:00:00	37	A3	-0.001833333	Blank	DM0-growth
861	47:10:00	37	A3	-0.001866667	Blank	DM0-growth
862	47:20:00	37	A3	-0.001933333	Blank	DM0-growth
863	47:30:00	37	A3	-0.001783333	Blank	DM0-growth
864	47:40:00	37	A3	-0.001783333	Blank	DM0-growth
865	47:50:00	37	A3	-0.0018	Blank	DM0-growth
866	48:00:00	37	A3	-0.001966667	Blank	DM0-growth
867	0:00:00	37	A4	0.0118	CZB151	DM0-growth
868	0:10:00	37	A4	0.012483333	CZB151	DM0-growth
869	0:20:00	37	A4	0.0122	CZB151	DM0-growth
870	0:30:00	37	A4	0.012033333	CZB151	DM0-growth
871	0:40:00	37	A4	0.012383333	CZB151	DM0-growth
872	0:50:00	37	A4	0.012333333	CZB151	DM0-growth
873	1:00:00	37	A4	0.01235	CZB151	DM0-growth
874	1:10:00	37	A4	0.012166667	CZB151	DM0-growth
875	1:20:00	37	A4	0.01245	CZB151	DM0-growth
876	1:30:00	37	A4	0.0125	CZB151	DM0-growth
877	1:40:00	37	A4	0.012883333	CZB151	DM0-growth
878	1:50:00	37	A4	0.0128	CZB151	DM0-growth
879	2:00:00	37	A4	0.012666667	CZB151	DM0-growth
880	2:10:00	37	A4	0.012383333	CZB151	DM0-growth
881	2:20:00	37	A4	0.012683333	CZB151	DM0-growth
882	2:30:00	37	A4	0.012816667	CZB151	DM0-growth
883	2:40:00	37	A4	0.012866667	CZB151	DM0-growth
884	2:50:00	37	A4	0.013133333	CZB151	DM0-growth
885	3:00:00	37	A4	0.012666667	CZB151	DM0-growth
886	3:10:00	37	A4	0.013366667	CZB151	DM0-growth
887	3:20:00	37	A4	0.013583333	CZB151	DM0-growth
888	3:30:00	37	A4	0.013633333	CZB151	DM0-growth
889	3:40:00	37	A4	0.0134	CZB151	DM0-growth
890	3:50:00	37	A4	0.013883333	CZB151	DM0-growth
891	4:00:00	37	A4	0.01385	CZB151	DM0-growth
892	4:10:00	37	A4	0.013866667	CZB151	DM0-growth
893	4:20:00	37	A4	0.013833333	CZB151	DM0-growth
894	4:30:00	37	A4	0.013916667	CZB151	DM0-growth
895	4:40:00	37	A4	0.013983333	CZB151	DM0-growth
896	4:50:00	37	A4	0.013883333	CZB151	DM0-growth
897	5:00:00	37	A4	0.01435	CZB151	DM0-growth
898	5:10:00	37	A4	0.014416667	CZB151	DM0-growth
899	5:20:00	37	A4	0.01435	CZB151	DM0-growth
900	5:30:00	37	A4	0.01495	CZB151	DM0-growth
901	5:40:00	37	A4	0.0147	CZB151	DM0-growth
902	5:50:00	37	A4	0.01505	CZB151	DM0-growth
903	6:00:00	37	A4	0.015333333	CZB151	DM0-growth
904	6:10:00	37	A4	0.01545	CZB151	DM0-growth
905	6:20:00	37	A4	0.01535	CZB151	DM0-growth
906	6:30:00	37	A4	0.0159	CZB151	DM0-growth
907	6:40:00	37	A4	0.016483333	CZB151	DM0-growth
908	6:50:00	37	A4	0.016716667	CZB151	DM0-growth
909	7:00:00	37	A4	0.016916667	CZB151	DM0-growth
910	7:10:00	37	A4	0.017933333	CZB151	DM0-growth
911	7:20:00	37	A4	0.018533333	CZB151	DM0-growth
912	7:30:00	37	A4	0.01935	CZB151	DM0-growth
913	7:40:00	37	A4	0.020033333	CZB151	DM0-growth
914	7:50:00	37	A4	0.020583333	CZB151	DM0-growth
915	8:00:00	37	A4	0.021766667	CZB151	DM0-growth
916	8:10:00	37	A4	0.022433333	CZB151	DM0-growth
917	8:20:00	37	A4	0.02375	CZB151	DM0-growth
918	8:30:00	37	A4	0.0247	CZB151	DM0-growth
919	8:40:00	37	A4	0.026066667	CZB151	DM0-growth
920	8:50:00	37	A4	0.027116667	CZB151	DM0-growth
921	9:00:00	37	A4	0.0289	CZB151	DM0-growth
922	9:10:00	37	A4	0.030733333	CZB151	DM0-growth
923	9:20:00	37	A4	0.032583333	CZB151	DM0-growth
924	9:30:00	37	A4	0.034716667	CZB151	DM0-growth
925	9:40:00	37	A4	0.036783333	CZB151	DM0-growth
926	9:50:00	37	A4	0.039433333	CZB151	DM0-growth
927	10:00:00	37	A4	0.042066667	CZB151	DM0-growth
928	10:10:00	37	A4	0.04445	CZB151	DM0-growth
929	10:20:00	37	A4	0.049016667	CZB151	DM0-growth
930	10:30:00	37	A4	0.053316667	CZB151	DM0-growth
931	10:40:00	37	A4	0.058233333	CZB151	DM0-growth
932	10:50:00	37	A4	0.062516667	CZB151	DM0-growth
933	11:00:00	37	A4	0.0668	CZB151	DM0-growth
934	11:10:00	37	A4	0.072583333	CZB151	DM0-growth
935	11:20:00	37	A4	0.07845	CZB151	DM0-growth
936	11:30:00	37	A4	0.085133333	CZB151	DM0-growth
937	11:40:00	37	A4	0.092316667	CZB151	DM0-growth
938	11:50:00	37	A4	0.100866667	CZB151	DM0-growth
939	12:00:00	37	A4	0.109566667	CZB151	DM0-growth
940	12:10:00	37	A4	0.117083333	CZB151	DM0-growth
941	12:20:00	37	A4	0.124183333	CZB151	DM0-growth
942	12:30:00	37	A4	0.1315	CZB151	DM0-growth
943	12:40:00	37	A4	0.140683333	CZB151	DM0-growth
944	12:50:00	37	A4	0.150766667	CZB151	DM0-growth
945	13:00:00	37	A4	0.159016667	CZB151	DM0-growth
946	13:10:00	37	A4	0.16825	CZB151	DM0-growth
947	13:20:00	37	A4	0.176816667	CZB151	DM0-growth
948	13:30:00	37	A4	0.18915	CZB151	DM0-growth
949	13:40:00	37	A4	0.199	CZB151	DM0-growth
950	13:50:00	37	A4	0.203666667	CZB151	DM0-growth
951	14:00:00	37	A4	0.209183333	CZB151	DM0-growth
952	14:10:00	37	A4	0.210483333	CZB151	DM0-growth
953	14:20:00	37	A4	0.205283333	CZB151	DM0-growth
954	14:30:00	37	A4	0.198033333	CZB151	DM0-growth
955	14:40:00	37	A4	0.19105	CZB151	DM0-growth
956	14:50:00	37	A4	0.183816667	CZB151	DM0-growth
957	15:00:00	37	A4	0.180916667	CZB151	DM0-growth
958	15:10:00	37	A4	0.1782	CZB151	DM0-growth
959	15:20:00	37	A4	0.1743	CZB151	DM0-growth
960	15:30:00	37	A4	0.1626	CZB151	DM0-growth
961	15:40:00	37	A4	0.156316667	CZB151	DM0-growth
962	15:50:00	37	A4	0.153583333	CZB151	DM0-growth
963	16:00:00	37	A4	0.151366667	CZB151	DM0-growth
964	16:10:00	37	A4	0.1501	CZB151	DM0-growth
965	16:20:00	37	A4	0.14915	CZB151	DM0-growth
966	16:30:00	37	A4	0.148183333	CZB151	DM0-growth
967	16:40:00	37	A4	0.1469	CZB151	DM0-growth
968	16:50:00	37	A4	0.1455	CZB151	DM0-growth
969	17:00:00	37	A4	0.144366667	CZB151	DM0-growth
970	17:10:00	37	A4	0.14345	CZB151	DM0-growth
971	17:20:00	37	A4	0.1415	CZB151	DM0-growth
972	17:30:00	37	A4	0.1399	CZB151	DM0-growth
973	17:40:00	37	A4	0.139216667	CZB151	DM0-growth
974	17:50:00	37	A4	0.13835	CZB151	DM0-growth
975	18:00:00	37	A4	0.137016667	CZB151	DM0-growth
976	18:10:00	37	A4	0.13735	CZB151	DM0-growth
977	18:20:00	37	A4	0.136166667	CZB151	DM0-growth
978	18:30:00	37	A4	0.1359	CZB151	DM0-growth
979	18:40:00	37	A4	0.1353	CZB151	DM0-growth
980	18:50:00	37	A4	0.1343	CZB151	DM0-growth
981	19:00:00	37	A4	0.133283333	CZB151	DM0-growth
982	19:10:00	37	A4	0.132633333	CZB151	DM0-growth
983	19:20:00	37	A4	0.1319	CZB151	DM0-growth
984	19:30:00	37	A4	0.1298	CZB151	DM0-growth
985	19:40:00	37	A4	0.13005	CZB151	DM0-growth
986	19:50:00	37	A4	0.129966667	CZB151	DM0-growth
987	20:00:00	37	A4	0.129383333	CZB151	DM0-growth
988	20:10:00	37	A4	0.12875	CZB151	DM0-growth
989	20:20:00	37	A4	0.1277	CZB151	DM0-growth
990	20:30:00	37	A4	0.127683333	CZB151	DM0-growth
991	20:40:00	37	A4	0.126233333	CZB151	DM0-growth
992	20:50:00	37	A4	0.125616667	CZB151	DM0-growth
993	21:00:00	37	A4	0.125016667	CZB151	DM0-growth
994	21:10:00	37	A4	0.124966667	CZB151	DM0-growth
995	21:20:00	37	A4	0.124233333	CZB151	DM0-growth
996	21:30:00	37	A4	0.123716667	CZB151	DM0-growth
997	21:40:00	37	A4	0.122733333	CZB151	DM0-growth
998	21:50:00	37	A4	0.121733333	CZB151	DM0-growth
999	22:00:00	37	A4	0.121983333	CZB151	DM0-growth
1000	22:10:00	37	A4	0.121666667	CZB151	DM0-growth
1001	22:20:00	37	A4	0.120733333	CZB151	DM0-growth
1002	22:30:00	37	A4	0.120133333	CZB151	DM0-growth
1003	22:40:00	37	A4	0.119616667	CZB151	DM0-growth
1004	22:50:00	37	A4	0.118683333	CZB151	DM0-growth
1005	23:00:00	37	A4	0.118183333	CZB151	DM0-growth
1006	23:10:00	37	A4	0.117883333	CZB151	DM0-growth
1007	23:20:00	37	A4	0.1174	CZB151	DM0-growth
1008	23:30:00	37	A4	0.1168	CZB151	DM0-growth
1009	23:40:00	37	A4	0.116533333	CZB151	DM0-growth
1010	23:50:00	37	A4	0.115816667	CZB151	DM0-growth
1011	24:00:00	37	A4	0.114866667	CZB151	DM0-growth
1012	24:10:00	37	A4	0.114616667	CZB151	DM0-growth
1013	24:20:00	37	A4	0.114083333	CZB151	DM0-growth
1014	24:30:00	37	A4	0.113083333	CZB151	DM0-growth
1015	24:40:00	37	A4	0.112233333	CZB151	DM0-growth
1016	24:50:00	37	A4	0.111983333	CZB151	DM0-growth
1017	25:00:00	37	A4	0.111566667	CZB151	DM0-growth
1018	25:10:00	37	A4	0.11135	CZB151	DM0-growth
1019	25:20:00	37	A4	0.110933333	CZB151	DM0-growth
1020	25:30:00	37	A4	0.1105	CZB151	DM0-growth
1021	25:40:00	37	A4	0.10945	CZB151	DM0-growth
1022	25:50:00	37	A4	0.109533333	CZB151	DM0-growth
1023	26:00:00	37	A4	0.108516667	CZB151	DM0-growth
1024	26:10:00	37	A4	0.108516667	CZB151	DM0-growth
1025	26:20:00	37	A4	0.107833333	CZB151	DM0-growth
1026	26:30:00	37	A4	0.107283333	CZB151	DM0-growth
1027	26:40:00	37	A4	0.107	CZB151	DM0-growth
1028	26:50:00	37	A4	0.106316667	CZB151	DM0-growth
1029	27:00:00	37	A4	0.105766667	CZB151	DM0-growth
1030	27:10:00	37	A4	0.1059	CZB151	DM0-growth
1031	27:20:00	37	A4	0.105	CZB151	DM0-growth
1032	27:30:00	37	A4	0.1048	CZB151	DM0-growth
1033	27:40:00	37	A4	0.104166667	CZB151	DM0-growth
1034	27:50:00	37	A4	0.10425	CZB151	DM0-growth
1035	28:00:00	37	A4	0.103616667	CZB151	DM0-growth
1036	28:10:00	37	A4	0.1029	CZB151	DM0-growth
1037	28:20:00	37	A4	0.102983333	CZB151	DM0-growth
1038	28:30:00	37	A4	0.100116667	CZB151	DM0-growth
1039	28:40:00	37	A4	0.10205	CZB151	DM0-growth
1040	28:50:00	37	A4	0.101283333	CZB151	DM0-growth
1041	29:00:00	37	A4	0.101116667	CZB151	DM0-growth
1042	29:10:00	37	A4	0.100683333	CZB151	DM0-growth
1043	29:20:00	37	A4	0.100166667	CZB151	DM0-growth
1044	29:30:00	37	A4	0.099566667	CZB151	DM0-growth
1045	29:40:00	37	A4	0.099583333	CZB151	DM0-growth
1046	29:50:00	37	A4	0.098733333	CZB151	DM0-growth
1047	30:00:00	37	A4	0.098266667	CZB151	DM0-growth
1048	30:10:00	37	A4	0.098583333	CZB151	DM0-growth
1049	30:20:00	37	A4	0.097983333	CZB151	DM0-growth
1050	30:30:00	37	A4	0.097516667	CZB151	DM0-growth
1051	30:40:00	37	A4	0.09705	CZB151	DM0-growth
1052	30:50:00	37	A4	0.096133333	CZB151	DM0-growth
1053	31:00:00	37	A4	0.096683333	CZB151	DM0-growth
1054	31:10:00	37	A4	0.095966667	CZB151	DM0-growth
1055	31:20:00	37	A4	0.095983333	CZB151	DM0-growth
1056	31:30:00	37	A4	0.095466667	CZB151	DM0-growth
1057	31:40:00	37	A4	0.095516667	CZB151	DM0-growth
1058	31:50:00	37	A4	0.094633333	CZB151	DM0-growth
1059	32:00:00	37	A4	0.09455	CZB151	DM0-growth
1060	32:10:00	37	A4	0.09415	CZB151	DM0-growth
1061	32:20:00	37	A4	0.09395	CZB151	DM0-growth
1062	32:30:00	37	A4	0.09265	CZB151	DM0-growth
1063	32:40:00	37	A4	0.091183333	CZB151	DM0-growth
1064	32:50:00	37	A4	0.0928	CZB151	DM0-growth
1065	33:00:00	37	A4	0.092566667	CZB151	DM0-growth
1066	33:10:00	37	A4	0.092733333	CZB151	DM0-growth
1067	33:20:00	37	A4	0.092066667	CZB151	DM0-growth
1068	33:30:00	37	A4	0.09155	CZB151	DM0-growth
1069	33:40:00	37	A4	0.09195	CZB151	DM0-growth
1070	33:50:00	37	A4	0.091483333	CZB151	DM0-growth
1071	34:00:00	37	A4	0.09065	CZB151	DM0-growth
1072	34:10:00	37	A4	0.09045	CZB151	DM0-growth
1073	34:20:00	37	A4	0.090366667	CZB151	DM0-growth
1074	34:30:00	37	A4	0.089816667	CZB151	DM0-growth
1075	34:40:00	37	A4	0.0899	CZB151	DM0-growth
1076	34:50:00	37	A4	0.089316667	CZB151	DM0-growth
1077	35:00:00	37	A4	0.08955	CZB151	DM0-growth
1078	35:10:00	37	A4	0.0892	CZB151	DM0-growth
1079	35:20:00	37	A4	0.089133333	CZB151	DM0-growth
1080	35:30:00	37	A4	0.089016667	CZB151	DM0-growth
1081	35:40:00	37	A4	0.088333333	CZB151	DM0-growth
1082	35:50:00	37	A4	0.087566667	CZB151	DM0-growth
1083	36:00:00	37	A4	0.088183333	CZB151	DM0-growth
1084	36:10:00	37	A4	0.08775	CZB151	DM0-growth
1085	36:20:00	37	A4	0.0877	CZB151	DM0-growth
1086	36:30:00	37	A4	0.085333333	CZB151	DM0-growth
1087	36:40:00	37	A4	0.086783333	CZB151	DM0-growth
1088	36:50:00	37	A4	0.086733333	CZB151	DM0-growth
1089	37:00:00	37	A4	0.086216667	CZB151	DM0-growth
1090	37:10:00	37	A4	0.0858	CZB151	DM0-growth
1091	37:20:00	37	A4	0.086233333	CZB151	DM0-growth
1092	37:30:00	37	A4	0.08625	CZB151	DM0-growth
1093	37:40:00	37	A4	0.08365	CZB151	DM0-growth
1094	37:50:00	37	A4	0.0851	CZB151	DM0-growth
1095	38:00:00	37	A4	0.08525	CZB151	DM0-growth
1096	38:10:00	37	A4	0.084733333	CZB151	DM0-growth
1097	38:20:00	37	A4	0.084433333	CZB151	DM0-growth
1098	38:30:00	37	A4	0.084266667	CZB151	DM0-growth
1099	38:40:00	37	A4	0.0839	CZB151	DM0-growth
1100	38:50:00	37	A4	0.084033333	CZB151	DM0-growth
1101	39:00:00	37	A4	0.08335	CZB151	DM0-growth
1102	39:10:00	37	A4	0.0832	CZB151	DM0-growth
1103	39:20:00	37	A4	0.08295	CZB151	DM0-growth
1104	39:30:00	37	A4	0.083166667	CZB151	DM0-growth
1105	39:40:00	37	A4	0.08285	CZB151	DM0-growth
1106	39:50:00	37	A4	0.082683333	CZB151	DM0-growth
1107	40:00:00	37	A4	0.08235	CZB151	DM0-growth
1108	40:10:00	37	A4	0.082433333	CZB151	DM0-growth
1109	40:20:00	37	A4	0.082116667	CZB151	DM0-growth
1110	40:30:00	37	A4	0.082183333	CZB151	DM0-growth
1111	40:40:00	37	A4	0.081833333	CZB151	DM0-growth
1112	40:50:00	37	A4	0.081133333	CZB151	DM0-growth
1113	41:00:00	37	A4	0.081	CZB151	DM0-growth
1114	41:10:00	37	A4	0.079983333	CZB151	DM0-growth
1115	41:20:00	37	A4	0.0811	CZB151	DM0-growth
1116	41:30:00	37	A4	0.0809	CZB151	DM0-growth
1117	41:40:00	37	A4	0.080383333	CZB151	DM0-growth
1118	41:50:00	37	A4	0.080816667	CZB151	DM0-growth
1119	42:00:00	37	A4	0.0802	CZB151	DM0-growth
1120	42:10:00	37	A4	0.079683333	CZB151	DM0-growth
1121	42:20:00	37	A4	0.079683333	CZB151	DM0-growth
1122	42:30:00	37	A4	0.079583333	CZB151	DM0-growth
1123	42:40:00	37	A4	0.079633333	CZB151	DM0-growth
1124	42:50:00	37	A4	0.078966667	CZB151	DM0-growth
1125	43:00:00	37	A4	0.079433333	CZB151	DM0-growth
1126	43:10:00	37	A4	0.078916667	CZB151	DM0-growth
1127	43:20:00	37	A4	0.078716667	CZB151	DM0-growth
1128	43:30:00	37	A4	0.07875	CZB151	DM0-growth
1129	43:40:00	37	A4	0.078	CZB151	DM0-growth
1130	43:50:00	37	A4	0.078533333	CZB151	DM0-growth
1131	44:00:00	37	A4	0.077966667	CZB151	DM0-growth
1132	44:10:00	37	A4	0.07825	CZB151	DM0-growth
1133	44:20:00	37	A4	0.0775	CZB151	DM0-growth
1134	44:30:00	37	A4	0.077516667	CZB151	DM0-growth
1135	44:40:00	37	A4	0.07605	CZB151	DM0-growth
1136	44:50:00	37	A4	0.077383333	CZB151	DM0-growth
1137	45:00:00	37	A4	0.0777	CZB151	DM0-growth
1138	45:10:00	37	A4	0.076616667	CZB151	DM0-growth
1139	45:20:00	37	A4	0.07695	CZB151	DM0-growth
1140	45:30:00	37	A4	0.075183333	CZB151	DM0-growth
1141	45:40:00	37	A4	0.07685	CZB151	DM0-growth
1142	45:50:00	37	A4	0.076933333	CZB151	DM0-growth
1143	46:00:00	37	A4	0.0762	CZB151	DM0-growth
1144	46:10:00	37	A4	0.076666667	CZB151	DM0-growth
1145	46:20:00	37	A4	0.076116667	CZB151	DM0-growth
1146	46:30:00	37	A4	0.075983333	CZB151	DM0-growth
1147	46:40:00	37	A4	0.076533333	CZB151	DM0-growth
1148	46:50:00	37	A4	0.0758	CZB151	DM0-growth
1149	47:00:00	37	A4	0.075766667	CZB151	DM0-growth
1150	47:10:00	37	A4	0.075733333	CZB151	DM0-growth
1151	47:20:00	37	A4	0.075866667	CZB151	DM0-growth
1152	47:30:00	37	A4	0.075916667	CZB151	DM0-growth
1153	47:40:00	37	A4	0.075816667	CZB151	DM0-growth
1154	47:50:00	37	A4	0.0755	CZB151	DM0-growth
1155	48:00:00	37	A4	0.075633333	CZB151	DM0-growth
1156	0:00:00	37	A5	-0.0009	CZB151	DM0-growth
1157	0:10:00	37	A5	0.000383333	CZB151	DM0-growth
1158	0:20:00	37	A5	0.0003	CZB151	DM0-growth
1159	0:30:00	37	A5	3.33e-05	CZB151	DM0-growth
1160	0:40:00	37	A5	0.000483333	CZB151	DM0-growth
1161	0:50:00	37	A5	0.000433333	CZB151	DM0-growth
1162	1:00:00	37	A5	0.00025	CZB151	DM0-growth
1163	1:10:00	37	A5	0.000666667	CZB151	DM0-growth
1164	1:20:00	37	A5	0.00085	CZB151	DM0-growth
1165	1:30:00	37	A5	0.0006	CZB151	DM0-growth
1166	1:40:00	37	A5	0.000783333	CZB151	DM0-growth
1167	1:50:00	37	A5	0.0008	CZB151	DM0-growth
1168	2:00:00	37	A5	0.000866667	CZB151	DM0-growth
1169	2:10:00	37	A5	0.000983333	CZB151	DM0-growth
1170	2:20:00	37	A5	0.001183333	CZB151	DM0-growth
1171	2:30:00	37	A5	0.001216667	CZB151	DM0-growth
1172	2:40:00	37	A5	0.001266667	CZB151	DM0-growth
1173	2:50:00	37	A5	0.001033333	CZB151	DM0-growth
1174	3:00:00	37	A5	0.001766667	CZB151	DM0-growth
1175	3:10:00	37	A5	0.001566667	CZB151	DM0-growth
1176	3:20:00	37	A5	0.001683333	CZB151	DM0-growth
1177	3:30:00	37	A5	0.001633333	CZB151	DM0-growth
1178	3:40:00	37	A5	0.0019	CZB151	DM0-growth
1179	3:50:00	37	A5	0.001983333	CZB151	DM0-growth
1180	4:00:00	37	A5	0.00215	CZB151	DM0-growth
1181	4:10:00	37	A5	0.002066667	CZB151	DM0-growth
1182	4:20:00	37	A5	0.002333333	CZB151	DM0-growth
1183	4:30:00	37	A5	0.002416667	CZB151	DM0-growth
1184	4:40:00	37	A5	0.002283333	CZB151	DM0-growth
1185	4:50:00	37	A5	0.002383333	CZB151	DM0-growth
1186	5:00:00	37	A5	0.00255	CZB151	DM0-growth
1187	5:10:00	37	A5	0.002516667	CZB151	DM0-growth
1188	5:20:00	37	A5	0.00295	CZB151	DM0-growth
1189	5:30:00	37	A5	0.00275	CZB151	DM0-growth
1190	5:40:00	37	A5	0.0032	CZB151	DM0-growth
1191	5:50:00	37	A5	0.00335	CZB151	DM0-growth
1192	6:00:00	37	A5	0.003533333	CZB151	DM0-growth
1193	6:10:00	37	A5	0.00365	CZB151	DM0-growth
1194	6:20:00	37	A5	0.00405	CZB151	DM0-growth
1195	6:30:00	37	A5	0.0042	CZB151	DM0-growth
1196	6:40:00	37	A5	0.004683333	CZB151	DM0-growth
1197	6:50:00	37	A5	0.005016667	CZB151	DM0-growth
1198	7:00:00	37	A5	0.005616667	CZB151	DM0-growth
1199	7:10:00	37	A5	0.006133333	CZB151	DM0-growth
1200	7:20:00	37	A5	0.006733333	CZB151	DM0-growth
1201	7:30:00	37	A5	0.00745	CZB151	DM0-growth
1202	7:40:00	37	A5	0.008033333	CZB151	DM0-growth
1203	7:50:00	37	A5	0.009283333	CZB151	DM0-growth
1204	8:00:00	37	A5	0.010066667	CZB151	DM0-growth
1205	8:10:00	37	A5	0.011033333	CZB151	DM0-growth
1206	8:20:00	37	A5	0.01225	CZB151	DM0-growth
1207	8:30:00	37	A5	0.0137	CZB151	DM0-growth
1208	8:40:00	37	A5	0.014766667	CZB151	DM0-growth
1209	8:50:00	37	A5	0.016416667	CZB151	DM0-growth
1210	9:00:00	37	A5	0.0183	CZB151	DM0-growth
1211	9:10:00	37	A5	0.019833333	CZB151	DM0-growth
1212	9:20:00	37	A5	0.022183333	CZB151	DM0-growth
1213	9:30:00	37	A5	0.024416667	CZB151	DM0-growth
1214	9:40:00	37	A5	0.026483333	CZB151	DM0-growth
1215	9:50:00	37	A5	0.028933333	CZB151	DM0-growth
1216	10:00:00	37	A5	0.032366667	CZB151	DM0-growth
1217	10:10:00	37	A5	0.03555	CZB151	DM0-growth
1218	10:20:00	37	A5	0.039816667	CZB151	DM0-growth
1219	10:30:00	37	A5	0.043616667	CZB151	DM0-growth
1220	10:40:00	37	A5	0.048733333	CZB151	DM0-growth
1221	10:50:00	37	A5	0.053716667	CZB151	DM0-growth
1222	11:00:00	37	A5	0.0594	CZB151	DM0-growth
1223	11:10:00	37	A5	0.063783333	CZB151	DM0-growth
1224	11:20:00	37	A5	0.06915	CZB151	DM0-growth
1225	11:30:00	37	A5	0.076333333	CZB151	DM0-growth
1226	11:40:00	37	A5	0.084316667	CZB151	DM0-growth
1227	11:50:00	37	A5	0.089666667	CZB151	DM0-growth
1228	12:00:00	37	A5	0.099766667	CZB151	DM0-growth
1229	12:10:00	37	A5	0.107283333	CZB151	DM0-growth
1230	12:20:00	37	A5	0.120783333	CZB151	DM0-growth
1231	12:30:00	37	A5	0.1308	CZB151	DM0-growth
1232	12:40:00	37	A5	0.145583333	CZB151	DM0-growth
1233	12:50:00	37	A5	0.159766667	CZB151	DM0-growth
1234	13:00:00	37	A5	0.170116667	CZB151	DM0-growth
1235	13:10:00	37	A5	0.17515	CZB151	DM0-growth
1236	13:20:00	37	A5	0.184216667	CZB151	DM0-growth
1237	13:30:00	37	A5	0.19345	CZB151	DM0-growth
1238	13:40:00	37	A5	0.2006	CZB151	DM0-growth
1239	13:50:00	37	A5	0.201966667	CZB151	DM0-growth
1240	14:00:00	37	A5	0.217983333	CZB151	DM0-growth
1241	14:10:00	37	A5	0.214483333	CZB151	DM0-growth
1242	14:20:00	37	A5	0.207883333	CZB151	DM0-growth
1243	14:30:00	37	A5	0.202333333	CZB151	DM0-growth
1244	14:40:00	37	A5	0.18985	CZB151	DM0-growth
1245	14:50:00	37	A5	0.180816667	CZB151	DM0-growth
1246	15:00:00	37	A5	0.174116667	CZB151	DM0-growth
1247	15:10:00	37	A5	0.1695	CZB151	DM0-growth
1248	15:20:00	37	A5	0.1642	CZB151	DM0-growth
1249	15:30:00	37	A5	0.1592	CZB151	DM0-growth
1250	15:40:00	37	A5	0.154116667	CZB151	DM0-growth
1251	15:50:00	37	A5	0.148383333	CZB151	DM0-growth
1252	16:00:00	37	A5	0.143566667	CZB151	DM0-growth
1253	16:10:00	37	A5	0.1396	CZB151	DM0-growth
1254	16:20:00	37	A5	0.13695	CZB151	DM0-growth
1255	16:30:00	37	A5	0.134983333	CZB151	DM0-growth
1256	16:40:00	37	A5	0.1334	CZB151	DM0-growth
1257	16:50:00	37	A5	0.1322	CZB151	DM0-growth
1258	17:00:00	37	A5	0.131366667	CZB151	DM0-growth
1259	17:10:00	37	A5	0.13085	CZB151	DM0-growth
1260	17:20:00	37	A5	0.1295	CZB151	DM0-growth
1261	17:30:00	37	A5	0.128	CZB151	DM0-growth
1262	17:40:00	37	A5	0.127816667	CZB151	DM0-growth
1263	17:50:00	37	A5	0.12645	CZB151	DM0-growth
1264	18:00:00	37	A5	0.125216667	CZB151	DM0-growth
1265	18:10:00	37	A5	0.12465	CZB151	DM0-growth
1266	18:20:00	37	A5	0.124066667	CZB151	DM0-growth
1267	18:30:00	37	A5	0.1237	CZB151	DM0-growth
1268	18:40:00	37	A5	0.1231	CZB151	DM0-growth
1269	18:50:00	37	A5	0.1211	CZB151	DM0-growth
1270	19:00:00	37	A5	0.120983333	CZB151	DM0-growth
1271	19:10:00	37	A5	0.120133333	CZB151	DM0-growth
1272	19:20:00	37	A5	0.1199	CZB151	DM0-growth
1273	19:30:00	37	A5	0.1188	CZB151	DM0-growth
1274	19:40:00	37	A5	0.11925	CZB151	DM0-growth
1275	19:50:00	37	A5	0.118266667	CZB151	DM0-growth
1276	20:00:00	37	A5	0.117483333	CZB151	DM0-growth
1277	20:10:00	37	A5	0.11655	CZB151	DM0-growth
1278	20:20:00	37	A5	0.1162	CZB151	DM0-growth
1279	20:30:00	37	A5	0.115783333	CZB151	DM0-growth
1280	20:40:00	37	A5	0.115433333	CZB151	DM0-growth
1281	20:50:00	37	A5	0.115016667	CZB151	DM0-growth
1282	21:00:00	37	A5	0.114316667	CZB151	DM0-growth
1283	21:10:00	37	A5	0.113466667	CZB151	DM0-growth
1284	21:20:00	37	A5	0.113333333	CZB151	DM0-growth
1285	21:30:00	37	A5	0.113116667	CZB151	DM0-growth
1286	21:40:00	37	A5	0.112433333	CZB151	DM0-growth
1287	21:50:00	37	A5	0.111633333	CZB151	DM0-growth
1288	22:00:00	37	A5	0.111283333	CZB151	DM0-growth
1289	22:10:00	37	A5	0.111166667	CZB151	DM0-growth
1290	22:20:00	37	A5	0.110733333	CZB151	DM0-growth
1291	22:30:00	37	A5	0.110633333	CZB151	DM0-growth
1292	22:40:00	37	A5	0.109816667	CZB151	DM0-growth
1293	22:50:00	37	A5	0.109383333	CZB151	DM0-growth
1294	23:00:00	37	A5	0.109283333	CZB151	DM0-growth
1295	23:10:00	37	A5	0.108383333	CZB151	DM0-growth
1296	23:20:00	37	A5	0.1081	CZB151	DM0-growth
1297	23:30:00	37	A5	0.1075	CZB151	DM0-growth
1298	23:40:00	37	A5	0.106933333	CZB151	DM0-growth
1299	23:50:00	37	A5	0.106316667	CZB151	DM0-growth
1300	24:00:00	37	A5	0.106066667	CZB151	DM0-growth
1301	24:10:00	37	A5	0.105716667	CZB151	DM0-growth
1302	24:20:00	37	A5	0.105383333	CZB151	DM0-growth
1303	24:30:00	37	A5	0.105183333	CZB151	DM0-growth
1304	24:40:00	37	A5	0.104833333	CZB151	DM0-growth
1305	24:50:00	37	A5	0.104383333	CZB151	DM0-growth
1306	25:00:00	37	A5	0.104166667	CZB151	DM0-growth
1307	25:10:00	37	A5	0.10335	CZB151	DM0-growth
1308	25:20:00	37	A5	0.103233333	CZB151	DM0-growth
1309	25:30:00	37	A5	0.1024	CZB151	DM0-growth
1310	25:40:00	37	A5	0.10225	CZB151	DM0-growth
1311	25:50:00	37	A5	0.101733333	CZB151	DM0-growth
1312	26:00:00	37	A5	0.101016667	CZB151	DM0-growth
1313	26:10:00	37	A5	0.100816667	CZB151	DM0-growth
1314	26:20:00	37	A5	0.100433333	CZB151	DM0-growth
1315	26:30:00	37	A5	0.099883333	CZB151	DM0-growth
1316	26:40:00	37	A5	0.0993	CZB151	DM0-growth
1317	26:50:00	37	A5	0.099016667	CZB151	DM0-growth
1318	27:00:00	37	A5	0.098966667	CZB151	DM0-growth
1319	27:10:00	37	A5	0.0985	CZB151	DM0-growth
1320	27:20:00	37	A5	0.098	CZB151	DM0-growth
1321	27:30:00	37	A5	0.0979	CZB151	DM0-growth
1322	27:40:00	37	A5	0.097166667	CZB151	DM0-growth
1323	27:50:00	37	A5	0.09705	CZB151	DM0-growth
1324	28:00:00	37	A5	0.096616667	CZB151	DM0-growth
1325	28:10:00	37	A5	0.0966	CZB151	DM0-growth
1326	28:20:00	37	A5	0.095583333	CZB151	DM0-growth
1327	28:30:00	37	A5	0.093416667	CZB151	DM0-growth
1328	28:40:00	37	A5	0.09505	CZB151	DM0-growth
1329	28:50:00	37	A5	0.094883333	CZB151	DM0-growth
1330	29:00:00	37	A5	0.094116667	CZB151	DM0-growth
1331	29:10:00	37	A5	0.094083333	CZB151	DM0-growth
1332	29:20:00	37	A5	0.093866667	CZB151	DM0-growth
1333	29:30:00	37	A5	0.093166667	CZB151	DM0-growth
1334	29:40:00	37	A5	0.093083333	CZB151	DM0-growth
1335	29:50:00	37	A5	0.092633333	CZB151	DM0-growth
1336	30:00:00	37	A5	0.092166667	CZB151	DM0-growth
1337	30:10:00	37	A5	0.091883333	CZB151	DM0-growth
1338	30:20:00	37	A5	0.091583333	CZB151	DM0-growth
1339	30:30:00	37	A5	0.091316667	CZB151	DM0-growth
1340	30:40:00	37	A5	0.09065	CZB151	DM0-growth
1341	30:50:00	37	A5	0.090433333	CZB151	DM0-growth
1342	31:00:00	37	A5	0.090183333	CZB151	DM0-growth
1343	31:10:00	37	A5	0.089666667	CZB151	DM0-growth
1344	31:20:00	37	A5	0.089683333	CZB151	DM0-growth
1345	31:30:00	37	A5	0.088666667	CZB151	DM0-growth
1346	31:40:00	37	A5	0.088816667	CZB151	DM0-growth
1347	31:50:00	37	A5	0.088833333	CZB151	DM0-growth
1348	32:00:00	37	A5	0.08785	CZB151	DM0-growth
1349	32:10:00	37	A5	0.08785	CZB151	DM0-growth
1350	32:20:00	37	A5	0.08755	CZB151	DM0-growth
1351	32:30:00	37	A5	0.08615	CZB151	DM0-growth
1352	32:40:00	37	A5	0.084683333	CZB151	DM0-growth
1353	32:50:00	37	A5	0.0867	CZB151	DM0-growth
1354	33:00:00	37	A5	0.086066667	CZB151	DM0-growth
1355	33:10:00	37	A5	0.085833333	CZB151	DM0-growth
1356	33:20:00	37	A5	0.085766667	CZB151	DM0-growth
1357	33:30:00	37	A5	0.08505	CZB151	DM0-growth
1358	33:40:00	37	A5	0.08485	CZB151	DM0-growth
1359	33:50:00	37	A5	0.084683333	CZB151	DM0-growth
1360	34:00:00	37	A5	0.08435	CZB151	DM0-growth
1361	34:10:00	37	A5	0.08415	CZB151	DM0-growth
1362	34:20:00	37	A5	0.083566667	CZB151	DM0-growth
1363	34:30:00	37	A5	0.083516667	CZB151	DM0-growth
1364	34:40:00	37	A5	0.0831	CZB151	DM0-growth
1365	34:50:00	37	A5	0.083016667	CZB151	DM0-growth
1366	35:00:00	37	A5	0.08245	CZB151	DM0-growth
1367	35:10:00	37	A5	0.0823	CZB151	DM0-growth
1368	35:20:00	37	A5	0.082333333	CZB151	DM0-growth
1369	35:30:00	37	A5	0.081816667	CZB151	DM0-growth
1370	35:40:00	37	A5	0.081633333	CZB151	DM0-growth
1371	35:50:00	37	A5	0.080466667	CZB151	DM0-growth
1372	36:00:00	37	A5	0.080983333	CZB151	DM0-growth
1373	36:10:00	37	A5	0.08075	CZB151	DM0-growth
1374	36:20:00	37	A5	0.0804	CZB151	DM0-growth
1375	36:30:00	37	A5	0.078233333	CZB151	DM0-growth
1376	36:40:00	37	A5	0.080083333	CZB151	DM0-growth
1377	36:50:00	37	A5	0.079733333	CZB151	DM0-growth
1378	37:00:00	37	A5	0.079316667	CZB151	DM0-growth
1379	37:10:00	37	A5	0.0791	CZB151	DM0-growth
1380	37:20:00	37	A5	0.078833333	CZB151	DM0-growth
1381	37:30:00	37	A5	0.07835	CZB151	DM0-growth
1382	37:40:00	37	A5	0.07715	CZB151	DM0-growth
1383	37:50:00	37	A5	0.0782	CZB151	DM0-growth
1384	38:00:00	37	A5	0.07775	CZB151	DM0-growth
1385	38:10:00	37	A5	0.077333333	CZB151	DM0-growth
1386	38:20:00	37	A5	0.077033333	CZB151	DM0-growth
1387	38:30:00	37	A5	0.076966667	CZB151	DM0-growth
1388	38:40:00	37	A5	0.0767	CZB151	DM0-growth
1389	38:50:00	37	A5	0.076533333	CZB151	DM0-growth
1390	39:00:00	37	A5	0.07635	CZB151	DM0-growth
1391	39:10:00	37	A5	0.0763	CZB151	DM0-growth
1392	39:20:00	37	A5	0.07605	CZB151	DM0-growth
1393	39:30:00	37	A5	0.075466667	CZB151	DM0-growth
1394	39:40:00	37	A5	0.07525	CZB151	DM0-growth
1395	39:50:00	37	A5	0.074983333	CZB151	DM0-growth
1396	40:00:00	37	A5	0.07515	CZB151	DM0-growth
1397	40:10:00	37	A5	0.074633333	CZB151	DM0-growth
1398	40:20:00	37	A5	0.074316667	CZB151	DM0-growth
1399	40:30:00	37	A5	0.074283333	CZB151	DM0-growth
1400	40:40:00	37	A5	0.074133333	CZB151	DM0-growth
1401	40:50:00	37	A5	0.073833333	CZB151	DM0-growth
1402	41:00:00	37	A5	0.0738	CZB151	DM0-growth
1403	41:10:00	37	A5	0.072183333	CZB151	DM0-growth
1404	41:20:00	37	A5	0.0732	CZB151	DM0-growth
1405	41:30:00	37	A5	0.0732	CZB151	DM0-growth
1406	41:40:00	37	A5	0.072883333	CZB151	DM0-growth
1407	41:50:00	37	A5	0.072816667	CZB151	DM0-growth
1408	42:00:00	37	A5	0.0724	CZB151	DM0-growth
1409	42:10:00	37	A5	0.072383333	CZB151	DM0-growth
1410	42:20:00	37	A5	0.072183333	CZB151	DM0-growth
1411	42:30:00	37	A5	0.072083333	CZB151	DM0-growth
1412	42:40:00	37	A5	0.071833333	CZB151	DM0-growth
1413	42:50:00	37	A5	0.071966667	CZB151	DM0-growth
1414	43:00:00	37	A5	0.071533333	CZB151	DM0-growth
1415	43:10:00	37	A5	0.071516667	CZB151	DM0-growth
1416	43:20:00	37	A5	0.071016667	CZB151	DM0-growth
1417	43:30:00	37	A5	0.07085	CZB151	DM0-growth
1418	43:40:00	37	A5	0.0702	CZB151	DM0-growth
1419	43:50:00	37	A5	0.070633333	CZB151	DM0-growth
1420	44:00:00	37	A5	0.070766667	CZB151	DM0-growth
1421	44:10:00	37	A5	0.07005	CZB151	DM0-growth
1422	44:20:00	37	A5	0.0703	CZB151	DM0-growth
1423	44:30:00	37	A5	0.070116667	CZB151	DM0-growth
1424	44:40:00	37	A5	0.06825	CZB151	DM0-growth
1425	44:50:00	37	A5	0.069683333	CZB151	DM0-growth
1426	45:00:00	37	A5	0.0694	CZB151	DM0-growth
1427	45:10:00	37	A5	0.068516667	CZB151	DM0-growth
1428	45:20:00	37	A5	0.06925	CZB151	DM0-growth
1429	45:30:00	37	A5	0.066783333	CZB151	DM0-growth
1430	45:40:00	37	A5	0.06875	CZB151	DM0-growth
1431	45:50:00	37	A5	0.068733333	CZB151	DM0-growth
1432	46:00:00	37	A5	0.0687	CZB151	DM0-growth
1433	46:10:00	37	A5	0.068666667	CZB151	DM0-growth
1434	46:20:00	37	A5	0.068416667	CZB151	DM0-growth
1435	46:30:00	37	A5	0.068483333	CZB151	DM0-growth
1436	46:40:00	37	A5	0.068033333	CZB151	DM0-growth
1437	46:50:00	37	A5	0.068	CZB151	DM0-growth
1438	47:00:00	37	A5	0.067866667	CZB151	DM0-growth
1439	47:10:00	37	A5	0.067533333	CZB151	DM0-growth
1440	47:20:00	37	A5	0.067266667	CZB151	DM0-growth
1441	47:30:00	37	A5	0.067316667	CZB151	DM0-growth
1442	47:40:00	37	A5	0.067316667	CZB151	DM0-growth
1443	47:50:00	37	A5	0.0673	CZB151	DM0-growth
1444	48:00:00	37	A5	0.066833333	CZB151	DM0-growth
1445	0:00:00	37	A6	-0.0018	CZB151	DM0-growth
1446	0:10:00	37	A6	-0.000316667	CZB151	DM0-growth
1447	0:20:00	37	A6	-0.0005	CZB151	DM0-growth
1448	0:30:00	37	A6	-0.000866667	CZB151	DM0-growth
1449	0:40:00	37	A6	-0.000416667	CZB151	DM0-growth
1450	0:50:00	37	A6	-0.000266667	CZB151	DM0-growth
1451	1:00:00	37	A6	-0.00055	CZB151	DM0-growth
1452	1:10:00	37	A6	-0.000133333	CZB151	DM0-growth
1453	1:20:00	37	A6	-5e-05	CZB151	DM0-growth
1454	1:30:00	37	A6	0.0001	CZB151	DM0-growth
1455	1:40:00	37	A6	-1.67e-05	CZB151	DM0-growth
1456	1:50:00	37	A6	0.0002	CZB151	DM0-growth
1457	2:00:00	37	A6	0.000166667	CZB151	DM0-growth
1458	2:10:00	37	A6	0.000383333	CZB151	DM0-growth
1459	2:20:00	37	A6	0.000583333	CZB151	DM0-growth
1460	2:30:00	37	A6	0.000816667	CZB151	DM0-growth
1461	2:40:00	37	A6	0.000866667	CZB151	DM0-growth
1462	2:50:00	37	A6	0.000733333	CZB151	DM0-growth
1463	3:00:00	37	A6	0.001366667	CZB151	DM0-growth
1464	3:10:00	37	A6	0.001366667	CZB151	DM0-growth
1465	3:20:00	37	A6	0.001483333	CZB151	DM0-growth
1466	3:30:00	37	A6	0.001433333	CZB151	DM0-growth
1467	3:40:00	37	A6	0.0015	CZB151	DM0-growth
1468	3:50:00	37	A6	0.001583333	CZB151	DM0-growth
1469	4:00:00	37	A6	0.00185	CZB151	DM0-growth
1470	4:10:00	37	A6	0.001766667	CZB151	DM0-growth
1471	4:20:00	37	A6	0.002133333	CZB151	DM0-growth
1472	4:30:00	37	A6	0.002316667	CZB151	DM0-growth
1473	4:40:00	37	A6	0.002183333	CZB151	DM0-growth
1474	4:50:00	37	A6	0.002483333	CZB151	DM0-growth
1475	5:00:00	37	A6	0.00245	CZB151	DM0-growth
1476	5:10:00	37	A6	0.002716667	CZB151	DM0-growth
1477	5:20:00	37	A6	0.00315	CZB151	DM0-growth
1478	5:30:00	37	A6	0.00295	CZB151	DM0-growth
1479	5:40:00	37	A6	0.0033	CZB151	DM0-growth
1480	5:50:00	37	A6	0.00355	CZB151	DM0-growth
1481	6:00:00	37	A6	0.003933333	CZB151	DM0-growth
1482	6:10:00	37	A6	0.00425	CZB151	DM0-growth
1483	6:20:00	37	A6	0.00465	CZB151	DM0-growth
1484	6:30:00	37	A6	0.0052	CZB151	DM0-growth
1485	6:40:00	37	A6	0.005583333	CZB151	DM0-growth
1486	6:50:00	37	A6	0.006216667	CZB151	DM0-growth
1487	7:00:00	37	A6	0.006716667	CZB151	DM0-growth
1488	7:10:00	37	A6	0.007333333	CZB151	DM0-growth
1489	7:20:00	37	A6	0.008033333	CZB151	DM0-growth
1490	7:30:00	37	A6	0.00905	CZB151	DM0-growth
1491	7:40:00	37	A6	0.009733333	CZB151	DM0-growth
1492	7:50:00	37	A6	0.011383333	CZB151	DM0-growth
1493	8:00:00	37	A6	0.012366667	CZB151	DM0-growth
1494	8:10:00	37	A6	0.013833333	CZB151	DM0-growth
1495	8:20:00	37	A6	0.01495	CZB151	DM0-growth
1496	8:30:00	37	A6	0.0167	CZB151	DM0-growth
1497	8:40:00	37	A6	0.018266667	CZB151	DM0-growth
1498	8:50:00	37	A6	0.020416667	CZB151	DM0-growth
1499	9:00:00	37	A6	0.0225	CZB151	DM0-growth
1500	9:10:00	37	A6	0.024833333	CZB151	DM0-growth
1501	9:20:00	37	A6	0.026683333	CZB151	DM0-growth
1502	9:30:00	37	A6	0.028516667	CZB151	DM0-growth
1503	9:40:00	37	A6	0.030283333	CZB151	DM0-growth
1504	9:50:00	37	A6	0.033533333	CZB151	DM0-growth
1505	10:00:00	37	A6	0.036366667	CZB151	DM0-growth
1506	10:10:00	37	A6	0.03895	CZB151	DM0-growth
1507	10:20:00	37	A6	0.042716667	CZB151	DM0-growth
1508	10:30:00	37	A6	0.045316667	CZB151	DM0-growth
1509	10:40:00	37	A6	0.048033333	CZB151	DM0-growth
1510	10:50:00	37	A6	0.052316667	CZB151	DM0-growth
1511	11:00:00	37	A6	0.0567	CZB151	DM0-growth
1512	11:10:00	37	A6	0.059683333	CZB151	DM0-growth
1513	11:20:00	37	A6	0.06865	CZB151	DM0-growth
1514	11:30:00	37	A6	0.073333333	CZB151	DM0-growth
1515	11:40:00	37	A6	0.078816667	CZB151	DM0-growth
1516	11:50:00	37	A6	0.085866667	CZB151	DM0-growth
1517	12:00:00	37	A6	0.093866667	CZB151	DM0-growth
1518	12:10:00	37	A6	0.107383333	CZB151	DM0-growth
1519	12:20:00	37	A6	0.130383333	CZB151	DM0-growth
1520	12:30:00	37	A6	0.1315	CZB151	DM0-growth
1521	12:40:00	37	A6	0.153383333	CZB151	DM0-growth
1522	12:50:00	37	A6	0.178666667	CZB151	DM0-growth
1523	13:00:00	37	A6	0.168016667	CZB151	DM0-growth
1524	13:10:00	37	A6	0.20305	CZB151	DM0-growth
1525	13:20:00	37	A6	0.223816667	CZB151	DM0-growth
1526	13:30:00	37	A6	0.21805	CZB151	DM0-growth
1527	13:40:00	37	A6	0.2453	CZB151	DM0-growth
1528	13:50:00	37	A6	0.242366667	CZB151	DM0-growth
1529	14:00:00	37	A6	0.241183333	CZB151	DM0-growth
1530	14:10:00	37	A6	0.235083333	CZB151	DM0-growth
1531	14:20:00	37	A6	0.244183333	CZB151	DM0-growth
1532	14:30:00	37	A6	0.252333333	CZB151	DM0-growth
1533	14:40:00	37	A6	0.25995	CZB151	DM0-growth
1534	14:50:00	37	A6	0.252816667	CZB151	DM0-growth
1535	15:00:00	37	A6	0.238916667	CZB151	DM0-growth
1536	15:10:00	37	A6	0.2221	CZB151	DM0-growth
1537	15:20:00	37	A6	0.2124	CZB151	DM0-growth
1538	15:30:00	37	A6	0.1949	CZB151	DM0-growth
1539	15:40:00	37	A6	0.183816667	CZB151	DM0-growth
1540	15:50:00	37	A6	0.177183333	CZB151	DM0-growth
1541	16:00:00	37	A6	0.170666667	CZB151	DM0-growth
1542	16:10:00	37	A6	0.1649	CZB151	DM0-growth
1543	16:20:00	37	A6	0.15835	CZB151	DM0-growth
1544	16:30:00	37	A6	0.152183333	CZB151	DM0-growth
1545	16:40:00	37	A6	0.1467	CZB151	DM0-growth
1546	16:50:00	37	A6	0.141	CZB151	DM0-growth
1547	17:00:00	37	A6	0.137266667	CZB151	DM0-growth
1548	17:10:00	37	A6	0.13405	CZB151	DM0-growth
1549	17:20:00	37	A6	0.1312	CZB151	DM0-growth
1550	17:30:00	37	A6	0.1291	CZB151	DM0-growth
1551	17:40:00	37	A6	0.128616667	CZB151	DM0-growth
1552	17:50:00	37	A6	0.12705	CZB151	DM0-growth
1553	18:00:00	37	A6	0.126716667	CZB151	DM0-growth
1554	18:10:00	37	A6	0.12575	CZB151	DM0-growth
1555	18:20:00	37	A6	0.125166667	CZB151	DM0-growth
1556	18:30:00	37	A6	0.1249	CZB151	DM0-growth
1557	18:40:00	37	A6	0.1241	CZB151	DM0-growth
1558	18:50:00	37	A6	0.1231	CZB151	DM0-growth
1559	19:00:00	37	A6	0.121883333	CZB151	DM0-growth
1560	19:10:00	37	A6	0.121233333	CZB151	DM0-growth
1561	19:20:00	37	A6	0.1202	CZB151	DM0-growth
1562	19:30:00	37	A6	0.1187	CZB151	DM0-growth
1563	19:40:00	37	A6	0.11895	CZB151	DM0-growth
1564	19:50:00	37	A6	0.118666667	CZB151	DM0-growth
1565	20:00:00	37	A6	0.118383333	CZB151	DM0-growth
1566	20:10:00	37	A6	0.11765	CZB151	DM0-growth
1567	20:20:00	37	A6	0.1176	CZB151	DM0-growth
1568	20:30:00	37	A6	0.117083333	CZB151	DM0-growth
1569	20:40:00	37	A6	0.116333333	CZB151	DM0-growth
1570	20:50:00	37	A6	0.116016667	CZB151	DM0-growth
1571	21:00:00	37	A6	0.115516667	CZB151	DM0-growth
1572	21:10:00	37	A6	0.114466667	CZB151	DM0-growth
1573	21:20:00	37	A6	0.114433333	CZB151	DM0-growth
1574	21:30:00	37	A6	0.113516667	CZB151	DM0-growth
1575	21:40:00	37	A6	0.113233333	CZB151	DM0-growth
1576	21:50:00	37	A6	0.111933333	CZB151	DM0-growth
1577	22:00:00	37	A6	0.112683333	CZB151	DM0-growth
1578	22:10:00	37	A6	0.112466667	CZB151	DM0-growth
1579	22:20:00	37	A6	0.111733333	CZB151	DM0-growth
1580	22:30:00	37	A6	0.111833333	CZB151	DM0-growth
1581	22:40:00	37	A6	0.111416667	CZB151	DM0-growth
1582	22:50:00	37	A6	0.110783333	CZB151	DM0-growth
1583	23:00:00	37	A6	0.110383333	CZB151	DM0-growth
1584	23:10:00	37	A6	0.110083333	CZB151	DM0-growth
1585	23:20:00	37	A6	0.1093	CZB151	DM0-growth
1586	23:30:00	37	A6	0.1089	CZB151	DM0-growth
1587	23:40:00	37	A6	0.108533333	CZB151	DM0-growth
1588	23:50:00	37	A6	0.108016667	CZB151	DM0-growth
1589	24:00:00	37	A6	0.108066667	CZB151	DM0-growth
1590	24:10:00	37	A6	0.106816667	CZB151	DM0-growth
1591	24:20:00	37	A6	0.107183333	CZB151	DM0-growth
1592	24:30:00	37	A6	0.106483333	CZB151	DM0-growth
1593	24:40:00	37	A6	0.106433333	CZB151	DM0-growth
1594	24:50:00	37	A6	0.105583333	CZB151	DM0-growth
1595	25:00:00	37	A6	0.105166667	CZB151	DM0-growth
1596	25:10:00	37	A6	0.10465	CZB151	DM0-growth
1597	25:20:00	37	A6	0.103933333	CZB151	DM0-growth
1598	25:30:00	37	A6	0.1036	CZB151	DM0-growth
1599	25:40:00	37	A6	0.10315	CZB151	DM0-growth
1600	25:50:00	37	A6	0.102733333	CZB151	DM0-growth
1601	26:00:00	37	A6	0.102516667	CZB151	DM0-growth
1602	26:10:00	37	A6	0.101916667	CZB151	DM0-growth
1603	26:20:00	37	A6	0.101733333	CZB151	DM0-growth
1604	26:30:00	37	A6	0.101283333	CZB151	DM0-growth
1605	26:40:00	37	A6	0.1012	CZB151	DM0-growth
1606	26:50:00	37	A6	0.100216667	CZB151	DM0-growth
1607	27:00:00	37	A6	0.099966667	CZB151	DM0-growth
1608	27:10:00	37	A6	0.0998	CZB151	DM0-growth
1609	27:20:00	37	A6	0.0991	CZB151	DM0-growth
1610	27:30:00	37	A6	0.099	CZB151	DM0-growth
1611	27:40:00	37	A6	0.098566667	CZB151	DM0-growth
1612	27:50:00	37	A6	0.09845	CZB151	DM0-growth
1613	28:00:00	37	A6	0.097716667	CZB151	DM0-growth
1614	28:10:00	37	A6	0.0975	CZB151	DM0-growth
1615	28:20:00	37	A6	0.096883333	CZB151	DM0-growth
1616	28:30:00	37	A6	0.095016667	CZB151	DM0-growth
1617	28:40:00	37	A6	0.09665	CZB151	DM0-growth
1618	28:50:00	37	A6	0.096383333	CZB151	DM0-growth
1619	29:00:00	37	A6	0.095916667	CZB151	DM0-growth
1620	29:10:00	37	A6	0.095483333	CZB151	DM0-growth
1621	29:20:00	37	A6	0.094966667	CZB151	DM0-growth
1622	29:30:00	37	A6	0.094666667	CZB151	DM0-growth
1623	29:40:00	37	A6	0.094383333	CZB151	DM0-growth
1624	29:50:00	37	A6	0.094033333	CZB151	DM0-growth
1625	30:00:00	37	A6	0.093266667	CZB151	DM0-growth
1626	30:10:00	37	A6	0.093483333	CZB151	DM0-growth
1627	30:20:00	37	A6	0.093183333	CZB151	DM0-growth
1628	30:30:00	37	A6	0.092616667	CZB151	DM0-growth
1629	30:40:00	37	A6	0.09215	CZB151	DM0-growth
1630	30:50:00	37	A6	0.092333333	CZB151	DM0-growth
1631	31:00:00	37	A6	0.091583333	CZB151	DM0-growth
1632	31:10:00	37	A6	0.091266667	CZB151	DM0-growth
1633	31:20:00	37	A6	0.090983333	CZB151	DM0-growth
1634	31:30:00	37	A6	0.090466667	CZB151	DM0-growth
1635	31:40:00	37	A6	0.090616667	CZB151	DM0-growth
1636	31:50:00	37	A6	0.090233333	CZB151	DM0-growth
1637	32:00:00	37	A6	0.09035	CZB151	DM0-growth
1638	32:10:00	37	A6	0.08965	CZB151	DM0-growth
1639	32:20:00	37	A6	0.08895	CZB151	DM0-growth
1640	32:30:00	37	A6	0.08795	CZB151	DM0-growth
1641	32:40:00	37	A6	0.086583333	CZB151	DM0-growth
1642	32:50:00	37	A6	0.0885	CZB151	DM0-growth
1643	33:00:00	37	A6	0.088066667	CZB151	DM0-growth
1644	33:10:00	37	A6	0.087733333	CZB151	DM0-growth
1645	33:20:00	37	A6	0.087466667	CZB151	DM0-growth
1646	33:30:00	37	A6	0.08715	CZB151	DM0-growth
1647	33:40:00	37	A6	0.08655	CZB151	DM0-growth
1648	33:50:00	37	A6	0.086583333	CZB151	DM0-growth
1649	34:00:00	37	A6	0.08605	CZB151	DM0-growth
1650	34:10:00	37	A6	0.08585	CZB151	DM0-growth
1651	34:20:00	37	A6	0.085466667	CZB151	DM0-growth
1652	34:30:00	37	A6	0.085416667	CZB151	DM0-growth
1653	34:40:00	37	A6	0.0849	CZB151	DM0-growth
1654	34:50:00	37	A6	0.084916667	CZB151	DM0-growth
1655	35:00:00	37	A6	0.08425	CZB151	DM0-growth
1656	35:10:00	37	A6	0.0843	CZB151	DM0-growth
1657	35:20:00	37	A6	0.083733333	CZB151	DM0-growth
1658	35:30:00	37	A6	0.083416667	CZB151	DM0-growth
1659	35:40:00	37	A6	0.083333333	CZB151	DM0-growth
1660	35:50:00	37	A6	0.082466667	CZB151	DM0-growth
1661	36:00:00	37	A6	0.082783333	CZB151	DM0-growth
1662	36:10:00	37	A6	0.08245	CZB151	DM0-growth
1663	36:20:00	37	A6	0.0824	CZB151	DM0-growth
1664	36:30:00	37	A6	0.080033333	CZB151	DM0-growth
1665	36:40:00	37	A6	0.081783333	CZB151	DM0-growth
1666	36:50:00	37	A6	0.081533333	CZB151	DM0-growth
1667	37:00:00	37	A6	0.081116667	CZB151	DM0-growth
1668	37:10:00	37	A6	0.0809	CZB151	DM0-growth
1669	37:20:00	37	A6	0.080333333	CZB151	DM0-growth
1670	37:30:00	37	A6	0.08035	CZB151	DM0-growth
1671	37:40:00	37	A6	0.07875	CZB151	DM0-growth
1672	37:50:00	37	A6	0.08	CZB151	DM0-growth
1673	38:00:00	37	A6	0.07985	CZB151	DM0-growth
1674	38:10:00	37	A6	0.079633333	CZB151	DM0-growth
1675	38:20:00	37	A6	0.079233333	CZB151	DM0-growth
1676	38:30:00	37	A6	0.079066667	CZB151	DM0-growth
1677	38:40:00	37	A6	0.0786	CZB151	DM0-growth
1678	38:50:00	37	A6	0.078333333	CZB151	DM0-growth
1679	39:00:00	37	A6	0.07855	CZB151	DM0-growth
1680	39:10:00	37	A6	0.078	CZB151	DM0-growth
1681	39:20:00	37	A6	0.07795	CZB151	DM0-growth
1682	39:30:00	37	A6	0.077366667	CZB151	DM0-growth
1683	39:40:00	37	A6	0.07745	CZB151	DM0-growth
1684	39:50:00	37	A6	0.076883333	CZB151	DM0-growth
1685	40:00:00	37	A6	0.07675	CZB151	DM0-growth
1686	40:10:00	37	A6	0.076433333	CZB151	DM0-growth
1687	40:20:00	37	A6	0.076216667	CZB151	DM0-growth
1688	40:30:00	37	A6	0.075883333	CZB151	DM0-growth
1689	40:40:00	37	A6	0.075633333	CZB151	DM0-growth
1690	40:50:00	37	A6	0.075733333	CZB151	DM0-growth
1691	41:00:00	37	A6	0.0755	CZB151	DM0-growth
1692	41:10:00	37	A6	0.074183333	CZB151	DM0-growth
1693	41:20:00	37	A6	0.0749	CZB151	DM0-growth
1694	41:30:00	37	A6	0.075	CZB151	DM0-growth
1695	41:40:00	37	A6	0.074683333	CZB151	DM0-growth
1696	41:50:00	37	A6	0.074116667	CZB151	DM0-growth
1697	42:00:00	37	A6	0.0742	CZB151	DM0-growth
1698	42:10:00	37	A6	0.073983333	CZB151	DM0-growth
1699	42:20:00	37	A6	0.073783333	CZB151	DM0-growth
1700	42:30:00	37	A6	0.073683333	CZB151	DM0-growth
1701	42:40:00	37	A6	0.073133333	CZB151	DM0-growth
1702	42:50:00	37	A6	0.073166667	CZB151	DM0-growth
1703	43:00:00	37	A6	0.072733333	CZB151	DM0-growth
1704	43:10:00	37	A6	0.072916667	CZB151	DM0-growth
1705	43:20:00	37	A6	0.072716667	CZB151	DM0-growth
1706	43:30:00	37	A6	0.07245	CZB151	DM0-growth
1707	43:40:00	37	A6	0.0718	CZB151	DM0-growth
1708	43:50:00	37	A6	0.072333333	CZB151	DM0-growth
1709	44:00:00	37	A6	0.072066667	CZB151	DM0-growth
1710	44:10:00	37	A6	0.07165	CZB151	DM0-growth
1711	44:20:00	37	A6	0.0714	CZB151	DM0-growth
1712	44:30:00	37	A6	0.071416667	CZB151	DM0-growth
1713	44:40:00	37	A6	0.06965	CZB151	DM0-growth
1714	44:50:00	37	A6	0.071183333	CZB151	DM0-growth
1715	45:00:00	37	A6	0.0707	CZB151	DM0-growth
1716	45:10:00	37	A6	0.069616667	CZB151	DM0-growth
1717	45:20:00	37	A6	0.07045	CZB151	DM0-growth
1718	45:30:00	37	A6	0.068083333	CZB151	DM0-growth
1719	45:40:00	37	A6	0.07015	CZB151	DM0-growth
1720	45:50:00	37	A6	0.069933333	CZB151	DM0-growth
1721	46:00:00	37	A6	0.0701	CZB151	DM0-growth
1722	46:10:00	37	A6	0.069866667	CZB151	DM0-growth
1723	46:20:00	37	A6	0.069716667	CZB151	DM0-growth
1724	46:30:00	37	A6	0.069483333	CZB151	DM0-growth
1725	46:40:00	37	A6	0.069133333	CZB151	DM0-growth
1726	46:50:00	37	A6	0.0692	CZB151	DM0-growth
1727	47:00:00	37	A6	0.069066667	CZB151	DM0-growth
1728	47:10:00	37	A6	0.068633333	CZB151	DM0-growth
1729	47:20:00	37	A6	0.068566667	CZB151	DM0-growth
1730	47:30:00	37	A6	0.068416667	CZB151	DM0-growth
1731	47:40:00	37	A6	0.068516667	CZB151	DM0-growth
1732	47:50:00	37	A6	0.0683	CZB151	DM0-growth
1733	48:00:00	37	A6	0.067733333	CZB151	DM0-growth
1734	0:00:00	37	A7	-0.0009	CZB151	DM0-growth
1735	0:10:00	37	A7	0.000283333	CZB151	DM0-growth
1736	0:20:00	37	A7	0.0005	CZB151	DM0-growth
1737	0:30:00	37	A7	0.000133333	CZB151	DM0-growth
1738	0:40:00	37	A7	0.000583333	CZB151	DM0-growth
1739	0:50:00	37	A7	0.000733333	CZB151	DM0-growth
1740	1:00:00	37	A7	0.00035	CZB151	DM0-growth
1741	1:10:00	37	A7	0.000766667	CZB151	DM0-growth
1742	1:20:00	37	A7	0.00095	CZB151	DM0-growth
1743	1:30:00	37	A7	0.001	CZB151	DM0-growth
1744	1:40:00	37	A7	0.000983333	CZB151	DM0-growth
1745	1:50:00	37	A7	0.0011	CZB151	DM0-growth
1746	2:00:00	37	A7	0.001166667	CZB151	DM0-growth
1747	2:10:00	37	A7	0.001283333	CZB151	DM0-growth
1748	2:20:00	37	A7	0.001383333	CZB151	DM0-growth
1749	2:30:00	37	A7	0.001516667	CZB151	DM0-growth
1750	2:40:00	37	A7	0.001666667	CZB151	DM0-growth
1751	2:50:00	37	A7	0.001533333	CZB151	DM0-growth
1752	3:00:00	37	A7	0.002066667	CZB151	DM0-growth
1753	3:10:00	37	A7	0.002066667	CZB151	DM0-growth
1754	3:20:00	37	A7	0.002083333	CZB151	DM0-growth
1755	3:30:00	37	A7	0.002033333	CZB151	DM0-growth
1756	3:40:00	37	A7	0.0023	CZB151	DM0-growth
1757	3:50:00	37	A7	0.002383333	CZB151	DM0-growth
1758	4:00:00	37	A7	0.00255	CZB151	DM0-growth
1759	4:10:00	37	A7	0.002466667	CZB151	DM0-growth
1760	4:20:00	37	A7	0.002833333	CZB151	DM0-growth
1761	4:30:00	37	A7	0.002816667	CZB151	DM0-growth
1762	4:40:00	37	A7	0.002983333	CZB151	DM0-growth
1763	4:50:00	37	A7	0.003183333	CZB151	DM0-growth
1764	5:00:00	37	A7	0.00315	CZB151	DM0-growth
1765	5:10:00	37	A7	0.003316667	CZB151	DM0-growth
1766	5:20:00	37	A7	0.00375	CZB151	DM0-growth
1767	5:30:00	37	A7	0.00385	CZB151	DM0-growth
1768	5:40:00	37	A7	0.0042	CZB151	DM0-growth
1769	5:50:00	37	A7	0.00425	CZB151	DM0-growth
1770	6:00:00	37	A7	0.004733333	CZB151	DM0-growth
1771	6:10:00	37	A7	0.00515	CZB151	DM0-growth
1772	6:20:00	37	A7	0.00555	CZB151	DM0-growth
1773	6:30:00	37	A7	0.0062	CZB151	DM0-growth
1774	6:40:00	37	A7	0.006583333	CZB151	DM0-growth
1775	6:50:00	37	A7	0.007116667	CZB151	DM0-growth
1776	7:00:00	37	A7	0.007816667	CZB151	DM0-growth
1777	7:10:00	37	A7	0.008233333	CZB151	DM0-growth
1778	7:20:00	37	A7	0.008633333	CZB151	DM0-growth
1779	7:30:00	37	A7	0.00935	CZB151	DM0-growth
1780	7:40:00	37	A7	0.009933333	CZB151	DM0-growth
1781	7:50:00	37	A7	0.010983333	CZB151	DM0-growth
1782	8:00:00	37	A7	0.011966667	CZB151	DM0-growth
1783	8:10:00	37	A7	0.013133333	CZB151	DM0-growth
1784	8:20:00	37	A7	0.01415	CZB151	DM0-growth
1785	8:30:00	37	A7	0.0158	CZB151	DM0-growth
1786	8:40:00	37	A7	0.017166667	CZB151	DM0-growth
1787	8:50:00	37	A7	0.018516667	CZB151	DM0-growth
1788	9:00:00	37	A7	0.0204	CZB151	DM0-growth
1789	9:10:00	37	A7	0.022233333	CZB151	DM0-growth
1790	9:20:00	37	A7	0.024483333	CZB151	DM0-growth
1791	9:30:00	37	A7	0.026516667	CZB151	DM0-growth
1792	9:40:00	37	A7	0.028983333	CZB151	DM0-growth
1793	9:50:00	37	A7	0.031933333	CZB151	DM0-growth
1794	10:00:00	37	A7	0.035766667	CZB151	DM0-growth
1795	10:10:00	37	A7	0.03975	CZB151	DM0-growth
1796	10:20:00	37	A7	0.045116667	CZB151	DM0-growth
1797	10:30:00	37	A7	0.050116667	CZB151	DM0-growth
1798	10:40:00	37	A7	0.055933333	CZB151	DM0-growth
1799	10:50:00	37	A7	0.061516667	CZB151	DM0-growth
1800	11:00:00	37	A7	0.0673	CZB151	DM0-growth
1801	11:10:00	37	A7	0.073183333	CZB151	DM0-growth
1802	11:20:00	37	A7	0.07765	CZB151	DM0-growth
1803	11:30:00	37	A7	0.083033333	CZB151	DM0-growth
1804	11:40:00	37	A7	0.089916667	CZB151	DM0-growth
1805	11:50:00	37	A7	0.094466667	CZB151	DM0-growth
1806	12:00:00	37	A7	0.100766667	CZB151	DM0-growth
1807	12:10:00	37	A7	0.106083333	CZB151	DM0-growth
1808	12:20:00	37	A7	0.108683333	CZB151	DM0-growth
1809	12:30:00	37	A7	0.1154	CZB151	DM0-growth
1810	12:40:00	37	A7	0.126483333	CZB151	DM0-growth
1811	12:50:00	37	A7	0.136166667	CZB151	DM0-growth
1812	13:00:00	37	A7	0.149516667	CZB151	DM0-growth
1813	13:10:00	37	A7	0.15455	CZB151	DM0-growth
1814	13:20:00	37	A7	0.160316667	CZB151	DM0-growth
1815	13:30:00	37	A7	0.17445	CZB151	DM0-growth
1816	13:40:00	37	A7	0.1821	CZB151	DM0-growth
1817	13:50:00	37	A7	0.195166667	CZB151	DM0-growth
1818	14:00:00	37	A7	0.196183333	CZB151	DM0-growth
1819	14:10:00	37	A7	0.203083333	CZB151	DM0-growth
1820	14:20:00	37	A7	0.208883333	CZB151	DM0-growth
1821	14:30:00	37	A7	0.212333333	CZB151	DM0-growth
1822	14:40:00	37	A7	0.20655	CZB151	DM0-growth
1823	14:50:00	37	A7	0.193016667	CZB151	DM0-growth
1824	15:00:00	37	A7	0.183616667	CZB151	DM0-growth
1825	15:10:00	37	A7	0.1761	CZB151	DM0-growth
1826	15:20:00	37	A7	0.1731	CZB151	DM0-growth
1827	15:30:00	37	A7	0.172	CZB151	DM0-growth
1828	15:40:00	37	A7	0.178216667	CZB151	DM0-growth
1829	15:50:00	37	A7	0.182183333	CZB151	DM0-growth
1830	16:00:00	37	A7	0.178666667	CZB151	DM0-growth
1831	16:10:00	37	A7	0.1723	CZB151	DM0-growth
1832	16:20:00	37	A7	0.16585	CZB151	DM0-growth
1833	16:30:00	37	A7	0.159183333	CZB151	DM0-growth
1834	16:40:00	37	A7	0.1538	CZB151	DM0-growth
1835	16:50:00	37	A7	0.1498	CZB151	DM0-growth
1836	17:00:00	37	A7	0.146866667	CZB151	DM0-growth
1837	17:10:00	37	A7	0.14465	CZB151	DM0-growth
1838	17:20:00	37	A7	0.1422	CZB151	DM0-growth
1839	17:30:00	37	A7	0.1396	CZB151	DM0-growth
1840	17:40:00	37	A7	0.137516667	CZB151	DM0-growth
1841	17:50:00	37	A7	0.13485	CZB151	DM0-growth
1842	18:00:00	37	A7	0.133416667	CZB151	DM0-growth
1843	18:10:00	37	A7	0.13215	CZB151	DM0-growth
1844	18:20:00	37	A7	0.129866667	CZB151	DM0-growth
1845	18:30:00	37	A7	0.1282	CZB151	DM0-growth
1846	18:40:00	37	A7	0.126	CZB151	DM0-growth
1847	18:50:00	37	A7	0.1243	CZB151	DM0-growth
1848	19:00:00	37	A7	0.124283333	CZB151	DM0-growth
1849	19:10:00	37	A7	0.122633333	CZB151	DM0-growth
1850	19:20:00	37	A7	0.1218	CZB151	DM0-growth
1851	19:30:00	37	A7	0.1201	CZB151	DM0-growth
1852	19:40:00	37	A7	0.12035	CZB151	DM0-growth
1853	19:50:00	37	A7	0.119766667	CZB151	DM0-growth
1854	20:00:00	37	A7	0.118483333	CZB151	DM0-growth
1855	20:10:00	37	A7	0.11785	CZB151	DM0-growth
1856	20:20:00	37	A7	0.1175	CZB151	DM0-growth
1857	20:30:00	37	A7	0.116483333	CZB151	DM0-growth
1858	20:40:00	37	A7	0.115533333	CZB151	DM0-growth
1859	20:50:00	37	A7	0.115216667	CZB151	DM0-growth
1860	21:00:00	37	A7	0.114116667	CZB151	DM0-growth
1861	21:10:00	37	A7	0.114466667	CZB151	DM0-growth
1862	21:20:00	37	A7	0.113933333	CZB151	DM0-growth
1863	21:30:00	37	A7	0.113616667	CZB151	DM0-growth
1864	21:40:00	37	A7	0.112233333	CZB151	DM0-growth
1865	21:50:00	37	A7	0.110633333	CZB151	DM0-growth
1866	22:00:00	37	A7	0.111383333	CZB151	DM0-growth
1867	22:10:00	37	A7	0.110766667	CZB151	DM0-growth
1868	22:20:00	37	A7	0.110733333	CZB151	DM0-growth
1869	22:30:00	37	A7	0.109533333	CZB151	DM0-growth
1870	22:40:00	37	A7	0.109216667	CZB151	DM0-growth
1871	22:50:00	37	A7	0.108983333	CZB151	DM0-growth
1872	23:00:00	37	A7	0.108283333	CZB151	DM0-growth
1873	23:10:00	37	A7	0.107583333	CZB151	DM0-growth
1874	23:20:00	37	A7	0.1075	CZB151	DM0-growth
1875	23:30:00	37	A7	0.107	CZB151	DM0-growth
1876	23:40:00	37	A7	0.106533333	CZB151	DM0-growth
1877	23:50:00	37	A7	0.106516667	CZB151	DM0-growth
1878	24:00:00	37	A7	0.106466667	CZB151	DM0-growth
1879	24:10:00	37	A7	0.106116667	CZB151	DM0-growth
1880	24:20:00	37	A7	0.105683333	CZB151	DM0-growth
1881	24:30:00	37	A7	0.105683333	CZB151	DM0-growth
1882	24:40:00	37	A7	0.105233333	CZB151	DM0-growth
1883	24:50:00	37	A7	0.104683333	CZB151	DM0-growth
1884	25:00:00	37	A7	0.104366667	CZB151	DM0-growth
1885	25:10:00	37	A7	0.10345	CZB151	DM0-growth
1886	25:20:00	37	A7	0.104033333	CZB151	DM0-growth
1887	25:30:00	37	A7	0.1033	CZB151	DM0-growth
1888	25:40:00	37	A7	0.10165	CZB151	DM0-growth
1889	25:50:00	37	A7	0.101133333	CZB151	DM0-growth
1890	26:00:00	37	A7	0.101216667	CZB151	DM0-growth
1891	26:10:00	37	A7	0.101016667	CZB151	DM0-growth
1892	26:20:00	37	A7	0.101633333	CZB151	DM0-growth
1893	26:30:00	37	A7	0.101183333	CZB151	DM0-growth
1894	26:40:00	37	A7	0.1015	CZB151	DM0-growth
1895	26:50:00	37	A7	0.101916667	CZB151	DM0-growth
1896	27:00:00	37	A7	0.103266667	CZB151	DM0-growth
1897	27:10:00	37	A7	0.1032	CZB151	DM0-growth
1898	27:20:00	37	A7	0.1013	CZB151	DM0-growth
1899	27:30:00	37	A7	0.1007	CZB151	DM0-growth
1900	27:40:00	37	A7	0.100766667	CZB151	DM0-growth
1901	27:50:00	37	A7	0.10495	CZB151	DM0-growth
1902	28:00:00	37	A7	0.104916667	CZB151	DM0-growth
1903	28:10:00	37	A7	0.1054	CZB151	DM0-growth
1904	28:20:00	37	A7	0.107483333	CZB151	DM0-growth
1905	28:30:00	37	A7	0.105916667	CZB151	DM0-growth
1906	28:40:00	37	A7	0.11175	CZB151	DM0-growth
1907	28:50:00	37	A7	0.114683333	CZB151	DM0-growth
1908	29:00:00	37	A7	0.114716667	CZB151	DM0-growth
1909	29:10:00	37	A7	0.118383333	CZB151	DM0-growth
1910	29:20:00	37	A7	0.122266667	CZB151	DM0-growth
1911	29:30:00	37	A7	0.136066667	CZB151	DM0-growth
1912	29:40:00	37	A7	0.142083333	CZB151	DM0-growth
1913	29:50:00	37	A7	0.146433333	CZB151	DM0-growth
1914	30:00:00	37	A7	0.167366667	CZB151	DM0-growth
1915	30:10:00	37	A7	0.163883333	CZB151	DM0-growth
1916	30:20:00	37	A7	0.180283333	CZB151	DM0-growth
1917	30:30:00	37	A7	0.203116667	CZB151	DM0-growth
1918	30:40:00	37	A7	0.19205	CZB151	DM0-growth
1919	30:50:00	37	A7	0.175433333	CZB151	DM0-growth
1920	31:00:00	37	A7	0.167483333	CZB151	DM0-growth
1921	31:10:00	37	A7	0.185966667	CZB151	DM0-growth
1922	31:20:00	37	A7	0.215183333	CZB151	DM0-growth
1923	31:30:00	37	A7	0.220166667	CZB151	DM0-growth
1924	31:40:00	37	A7	0.203416667	CZB151	DM0-growth
1925	31:50:00	37	A7	0.198733333	CZB151	DM0-growth
1926	32:00:00	37	A7	0.18485	CZB151	DM0-growth
1927	32:10:00	37	A7	0.17915	CZB151	DM0-growth
1928	32:20:00	37	A7	0.18705	CZB151	DM0-growth
1929	32:30:00	37	A7	0.18455	CZB151	DM0-growth
1930	32:40:00	37	A7	0.165683333	CZB151	DM0-growth
1931	32:50:00	37	A7	0.1789	CZB151	DM0-growth
1932	33:00:00	37	A7	0.206066667	CZB151	DM0-growth
1933	33:10:00	37	A7	0.185333333	CZB151	DM0-growth
1934	33:20:00	37	A7	0.191466667	CZB151	DM0-growth
1935	33:30:00	37	A7	0.16805	CZB151	DM0-growth
1936	33:40:00	37	A7	0.16725	CZB151	DM0-growth
1937	33:50:00	37	A7	0.169283333	CZB151	DM0-growth
1938	34:00:00	37	A7	0.18365	CZB151	DM0-growth
1939	34:10:00	37	A7	0.16795	CZB151	DM0-growth
1940	34:20:00	37	A7	0.170866667	CZB151	DM0-growth
1941	34:30:00	37	A7	0.157316667	CZB151	DM0-growth
1942	34:40:00	37	A7	0.177	CZB151	DM0-growth
1943	34:50:00	37	A7	0.160516667	CZB151	DM0-growth
1944	35:00:00	37	A7	0.17725	CZB151	DM0-growth
1945	35:10:00	37	A7	0.1603	CZB151	DM0-growth
1946	35:20:00	37	A7	0.207533333	CZB151	DM0-growth
1947	35:30:00	37	A7	0.167116667	CZB151	DM0-growth
1948	35:40:00	37	A7	0.224233333	CZB151	DM0-growth
1949	35:50:00	37	A7	0.195166667	CZB151	DM0-growth
1950	36:00:00	37	A7	0.183883333	CZB151	DM0-growth
1951	36:10:00	37	A7	0.19735	CZB151	DM0-growth
1952	36:20:00	37	A7	0.1712	CZB151	DM0-growth
1953	36:30:00	37	A7	0.169233333	CZB151	DM0-growth
1954	36:40:00	37	A7	0.195583333	CZB151	DM0-growth
1955	36:50:00	37	A7	0.195833333	CZB151	DM0-growth
1956	37:00:00	37	A7	0.156816667	CZB151	DM0-growth
1957	37:10:00	37	A7	0.1762	CZB151	DM0-growth
1958	37:20:00	37	A7	0.174133333	CZB151	DM0-growth
1959	37:30:00	37	A7	0.16745	CZB151	DM0-growth
1960	37:40:00	37	A7	0.15445	CZB151	DM0-growth
1961	37:50:00	37	A7	0.1461	CZB151	DM0-growth
1962	38:00:00	37	A7	0.12835	CZB151	DM0-growth
1963	38:10:00	37	A7	0.121333333	CZB151	DM0-growth
1964	38:20:00	37	A7	0.117033333	CZB151	DM0-growth
1965	38:30:00	37	A7	0.113166667	CZB151	DM0-growth
1966	38:40:00	37	A7	0.1111	CZB151	DM0-growth
1967	38:50:00	37	A7	0.110633333	CZB151	DM0-growth
1968	39:00:00	37	A7	0.11035	CZB151	DM0-growth
1969	39:10:00	37	A7	0.1105	CZB151	DM0-growth
1970	39:20:00	37	A7	0.10955	CZB151	DM0-growth
1971	39:30:00	37	A7	0.109766667	CZB151	DM0-growth
1972	39:40:00	37	A7	0.11005	CZB151	DM0-growth
1973	39:50:00	37	A7	0.110283333	CZB151	DM0-growth
1974	40:00:00	37	A7	0.11025	CZB151	DM0-growth
1975	40:10:00	37	A7	0.109333333	CZB151	DM0-growth
1976	40:20:00	37	A7	0.108916667	CZB151	DM0-growth
1977	40:30:00	37	A7	0.109283333	CZB151	DM0-growth
1978	40:40:00	37	A7	0.109133333	CZB151	DM0-growth
1979	40:50:00	37	A7	0.108433333	CZB151	DM0-growth
1980	41:00:00	37	A7	0.1083	CZB151	DM0-growth
1981	41:10:00	37	A7	0.107683333	CZB151	DM0-growth
1982	41:20:00	37	A7	0.1078	CZB151	DM0-growth
1983	41:30:00	37	A7	0.1113	CZB151	DM0-growth
1984	41:40:00	37	A7	0.110883333	CZB151	DM0-growth
1985	41:50:00	37	A7	0.107416667	CZB151	DM0-growth
1986	42:00:00	37	A7	0.1116	CZB151	DM0-growth
1987	42:10:00	37	A7	0.107483333	CZB151	DM0-growth
1988	42:20:00	37	A7	0.113783333	CZB151	DM0-growth
1989	42:30:00	37	A7	0.112483333	CZB151	DM0-growth
1990	42:40:00	37	A7	0.111233333	CZB151	DM0-growth
1991	42:50:00	37	A7	0.114166667	CZB151	DM0-growth
1992	43:00:00	37	A7	0.106633333	CZB151	DM0-growth
1993	43:10:00	37	A7	0.111716667	CZB151	DM0-growth
1994	43:20:00	37	A7	0.106816667	CZB151	DM0-growth
1995	43:30:00	37	A7	0.10645	CZB151	DM0-growth
1996	43:40:00	37	A7	0.1061	CZB151	DM0-growth
1997	43:50:00	37	A7	0.108233333	CZB151	DM0-growth
1998	44:00:00	37	A7	0.108566667	CZB151	DM0-growth
[truncated: 53,489 more rows]
