# Supplementary material for: Genomic and phenotypic evolution of Escherichia coli in a novel citrate-only resource environment
Source: eLife. 2020 May 29;9:e55414. doi: 10.7554/eLife.55414 (PMC7299349; doi:10.7554/eLife.55414)
Supplement: Figure 8—source data 1. [file elife-55414-fig8-data1.csv]

	Time	Temperature	Well	OD420	Name	Experiment
0	0:00:00	37	A1	-0.000783333	Blank	DM25-growth
1	0:10:00	37	A1	-0.000766667	Blank	DM25-growth
2	0:20:00	37	A1	-0.00065	Blank	DM25-growth
3	0:30:00	37	A1	-0.0008	Blank	DM25-growth
4	0:40:00	37	A1	-0.0007	Blank	DM25-growth
5	0:50:00	37	A1	-0.00075	Blank	DM25-growth
6	1:00:00	37	A1	-0.000716667	Blank	DM25-growth
7	1:10:00	37	A1	-0.000983333	Blank	DM25-growth
8	1:20:00	37	A1	-0.0008	Blank	DM25-growth
9	1:30:00	37	A1	-0.000716667	Blank	DM25-growth
10	1:40:00	37	A1	-0.0009	Blank	DM25-growth
11	1:50:00	37	A1	-0.00085	Blank	DM25-growth
12	2:00:00	37	A1	-0.000966667	Blank	DM25-growth
13	2:10:00	37	A1	-0.001166667	Blank	DM25-growth
14	2:20:00	37	A1	-0.0009	Blank	DM25-growth
15	2:30:00	37	A1	-6.67e-05	Blank	DM25-growth
16	2:40:00	37	A1	0.002716667	Blank	DM25-growth
17	2:50:00	37	A1	0.0051	Blank	DM25-growth
18	3:00:00	37	A1	0.00705	Blank	DM25-growth
19	3:10:00	37	A1	0.0092	Blank	DM25-growth
20	3:20:00	37	A1	0.00955	Blank	DM25-growth
21	3:30:00	37	A1	0.009583333	Blank	DM25-growth
22	3:40:00	37	A1	0.00955	Blank	DM25-growth
23	3:50:00	37	A1	0.00955	Blank	DM25-growth
24	4:00:00	37	A1	0.0092	Blank	DM25-growth
25	4:10:00	37	A1	0.009133333	Blank	DM25-growth
26	4:20:00	37	A1	0.0089	Blank	DM25-growth
27	4:30:00	37	A1	0.008583333	Blank	DM25-growth
28	4:40:00	37	A1	0.008533333	Blank	DM25-growth
29	4:50:00	37	A1	0.008666667	Blank	DM25-growth
30	5:00:00	37	A1	0.0079	Blank	DM25-growth
31	5:10:00	37	A1	0.0061	Blank	DM25-growth
32	5:20:00	37	A1	0.0045	Blank	DM25-growth
33	5:30:00	37	A1	0.004466667	Blank	DM25-growth
34	5:40:00	37	A1	0.00525	Blank	DM25-growth
35	5:50:00	37	A1	0.002766667	Blank	DM25-growth
36	6:00:00	37	A1	0.002933333	Blank	DM25-growth
37	6:10:00	37	A1	0.000916667	Blank	DM25-growth
38	6:20:00	37	A1	0.000166667	Blank	DM25-growth
39	6:30:00	37	A1	0.00025	Blank	DM25-growth
40	6:40:00	37	A1	-0.0002	Blank	DM25-growth
41	6:50:00	37	A1	-0.000466667	Blank	DM25-growth
42	7:00:00	37	A1	-0.000616667	Blank	DM25-growth
43	7:10:00	37	A1	-0.000366667	Blank	DM25-growth
44	7:20:00	37	A1	-0.000266667	Blank	DM25-growth
45	7:30:00	37	A1	-0.000333333	Blank	DM25-growth
46	7:40:00	37	A1	-0.000616667	Blank	DM25-growth
47	7:50:00	37	A1	-0.000666667	Blank	DM25-growth
48	8:00:00	37	A1	-0.000233333	Blank	DM25-growth
49	8:10:00	37	A1	-0.00035	Blank	DM25-growth
50	8:20:00	37	A1	0.000583333	Blank	DM25-growth
51	8:30:00	37	A1	0.00145	Blank	DM25-growth
52	8:40:00	37	A1	0.001166667	Blank	DM25-growth
53	8:50:00	37	A1	0.003116667	Blank	DM25-growth
54	9:00:00	37	A1	0.002966667	Blank	DM25-growth
55	9:10:00	37	A1	0.002833333	Blank	DM25-growth
56	9:20:00	37	A1	0.004466667	Blank	DM25-growth
57	9:30:00	37	A1	0.004716667	Blank	DM25-growth
58	9:40:00	37	A1	0.004816667	Blank	DM25-growth
59	9:50:00	37	A1	0.0048	Blank	DM25-growth
60	10:00:00	37	A1	0.00465	Blank	DM25-growth
61	10:10:00	37	A1	0.003466667	Blank	DM25-growth
62	10:20:00	37	A1	0.00395	Blank	DM25-growth
63	10:30:00	37	A1	0.003633333	Blank	DM25-growth
64	10:40:00	37	A1	0.003233333	Blank	DM25-growth
65	10:50:00	37	A1	0.002166667	Blank	DM25-growth
66	11:00:00	37	A1	0.003866667	Blank	DM25-growth
67	11:10:00	37	A1	0.0038	Blank	DM25-growth
68	11:20:00	37	A1	0.0038	Blank	DM25-growth
69	11:30:00	37	A1	0.002966667	Blank	DM25-growth
70	11:40:00	37	A1	0.0027	Blank	DM25-growth
71	11:50:00	37	A1	0.002616667	Blank	DM25-growth
72	12:00:00	37	A1	0.002066667	Blank	DM25-growth
73	12:10:00	37	A1	0.002	Blank	DM25-growth
74	12:20:00	37	A1	0.00185	Blank	DM25-growth
75	12:30:00	37	A1	0.002766667	Blank	DM25-growth
76	12:40:00	37	A1	0.003166667	Blank	DM25-growth
77	12:50:00	37	A1	0.0024	Blank	DM25-growth
78	13:00:00	37	A1	0.001916667	Blank	DM25-growth
79	13:10:00	37	A1	0.002083333	Blank	DM25-growth
80	13:20:00	37	A1	0.001866667	Blank	DM25-growth
81	13:30:00	37	A1	0.000816667	Blank	DM25-growth
82	13:40:00	37	A1	0.002666667	Blank	DM25-growth
83	13:50:00	37	A1	0.000716667	Blank	DM25-growth
84	14:00:00	37	A1	0.002933333	Blank	DM25-growth
85	14:10:00	37	A1	-5e-05	Blank	DM25-growth
86	14:20:00	37	A1	0.0032	Blank	DM25-growth
87	14:30:00	37	A1	-0.00075	Blank	DM25-growth
88	14:40:00	37	A1	-0.000783333	Blank	DM25-growth
89	14:50:00	37	A1	-0.0007	Blank	DM25-growth
90	15:00:00	37	A1	-0.000816667	Blank	DM25-growth
91	15:10:00	37	A1	-0.001066667	Blank	DM25-growth
92	15:20:00	37	A1	-0.001166667	Blank	DM25-growth
93	15:30:00	37	A1	-0.001116667	Blank	DM25-growth
94	15:40:00	37	A1	-0.001333333	Blank	DM25-growth
95	15:50:00	37	A1	-0.001016667	Blank	DM25-growth
96	16:00:00	37	A1	-0.001133333	Blank	DM25-growth
97	16:10:00	37	A1	0.001283333	Blank	DM25-growth
98	16:20:00	37	A1	0.00335	Blank	DM25-growth
99	16:30:00	37	A1	0.00375	Blank	DM25-growth
100	16:40:00	37	A1	0.003566667	Blank	DM25-growth
101	16:50:00	37	A1	0.003816667	Blank	DM25-growth
102	17:00:00	37	A1	0.00485	Blank	DM25-growth
103	17:10:00	37	A1	0.005583333	Blank	DM25-growth
104	17:20:00	37	A1	0.006933333	Blank	DM25-growth
105	17:30:00	37	A1	0.004883333	Blank	DM25-growth
106	17:40:00	37	A1	0.0031	Blank	DM25-growth
107	17:50:00	37	A1	0.004283333	Blank	DM25-growth
108	18:00:00	37	A1	0.002933333	Blank	DM25-growth
109	18:10:00	37	A1	0.003466667	Blank	DM25-growth
110	18:20:00	37	A1	0.004333333	Blank	DM25-growth
111	18:30:00	37	A1	0.003966667	Blank	DM25-growth
112	18:40:00	37	A1	0.003916667	Blank	DM25-growth
113	18:50:00	37	A1	0.006083333	Blank	DM25-growth
114	19:00:00	37	A1	0.007733333	Blank	DM25-growth
115	19:10:00	37	A1	0.005883333	Blank	DM25-growth
116	19:20:00	37	A1	-0.00155	Blank	DM25-growth
117	19:30:00	37	A1	-0.0018	Blank	DM25-growth
118	19:40:00	37	A1	-0.002083333	Blank	DM25-growth
119	19:50:00	37	A1	-0.001633333	Blank	DM25-growth
120	20:00:00	37	A1	-0.001866667	Blank	DM25-growth
121	20:10:00	37	A1	0.000816667	Blank	DM25-growth
122	20:20:00	37	A1	-0.001383333	Blank	DM25-growth
123	20:30:00	37	A1	-0.001516667	Blank	DM25-growth
124	20:40:00	37	A1	-0.001566667	Blank	DM25-growth
125	20:50:00	37	A1	0.003866667	Blank	DM25-growth
126	21:00:00	37	A1	-0.001	Blank	DM25-growth
127	21:10:00	37	A1	-0.000666667	Blank	DM25-growth
128	21:20:00	37	A1	-0.001566667	Blank	DM25-growth
129	21:30:00	37	A1	0.0099	Blank	DM25-growth
130	21:40:00	37	A1	0.0035	Blank	DM25-growth
131	21:50:00	37	A1	-0.002733333	Blank	DM25-growth
132	22:00:00	37	A1	-0.002933333	Blank	DM25-growth
133	22:10:00	37	A1	-0.001033333	Blank	DM25-growth
134	22:20:00	37	A1	-0.001266667	Blank	DM25-growth
135	22:30:00	37	A1	-0.0012	Blank	DM25-growth
136	22:40:00	37	A1	-0.00035	Blank	DM25-growth
137	22:50:00	37	A1	-0.000433333	Blank	DM25-growth
138	23:00:00	37	A1	-0.00035	Blank	DM25-growth
139	23:10:00	37	A1	-0.00035	Blank	DM25-growth
140	23:20:00	37	A1	-0.000483333	Blank	DM25-growth
141	23:30:00	37	A1	-0.001533333	Blank	DM25-growth
142	23:40:00	37	A1	-0.00035	Blank	DM25-growth
143	23:50:00	37	A1	-0.00025	Blank	DM25-growth
144	24:00:00	37	A1	-0.000233333	Blank	DM25-growth
145	24:10:00	37	A1	-0.000333333	Blank	DM25-growth
146	24:20:00	37	A1	-0.0003	Blank	DM25-growth
147	24:30:00	37	A1	-0.001483333	Blank	DM25-growth
148	24:40:00	37	A1	-0.000433333	Blank	DM25-growth
149	24:50:00	37	A1	-0.000616667	Blank	DM25-growth
150	25:00:00	37	A1	0.00855	Blank	DM25-growth
151	25:10:00	37	A1	-0.000416667	Blank	DM25-growth
152	25:20:00	37	A1	-0.000316667	Blank	DM25-growth
153	25:30:00	37	A1	-0.000333333	Blank	DM25-growth
154	25:40:00	37	A1	-0.000266667	Blank	DM25-growth
155	25:50:00	37	A1	-0.000166667	Blank	DM25-growth
156	26:00:00	37	A1	0.0088	Blank	DM25-growth
157	26:10:00	37	A1	0.002616667	Blank	DM25-growth
158	26:20:00	37	A1	-0.000433333	Blank	DM25-growth
159	26:30:00	37	A1	-0.000266667	Blank	DM25-growth
160	26:40:00	37	A1	-0.000633333	Blank	DM25-growth
161	26:50:00	37	A1	-0.000316667	Blank	DM25-growth
162	27:00:00	37	A1	0.007266667	Blank	DM25-growth
163	27:10:00	37	A1	-0.0006	Blank	DM25-growth
164	27:20:00	37	A1	-0.000233333	Blank	DM25-growth
165	27:30:00	37	A1	-0.0004	Blank	DM25-growth
166	27:40:00	37	A1	-0.000383333	Blank	DM25-growth
167	27:50:00	37	A1	0.000616667	Blank	DM25-growth
168	28:00:00	37	A1	-0.00045	Blank	DM25-growth
169	28:10:00	37	A1	-0.000183333	Blank	DM25-growth
170	28:20:00	37	A1	-5e-05	Blank	DM25-growth
171	28:30:00	37	A1	-0.00045	Blank	DM25-growth
172	28:40:00	37	A1	-0.00015	Blank	DM25-growth
173	28:50:00	37	A1	-0.000316667	Blank	DM25-growth
174	29:00:00	37	A1	-0.001333333	Blank	DM25-growth
175	29:10:00	37	A1	0.002833333	Blank	DM25-growth
176	29:20:00	37	A1	-0.00015	Blank	DM25-growth
177	29:30:00	37	A1	-0.001883333	Blank	DM25-growth
178	29:40:00	37	A1	-0.0014	Blank	DM25-growth
179	29:50:00	37	A1	-0.001216667	Blank	DM25-growth
180	30:00:00	37	A1	-0.000733333	Blank	DM25-growth
181	30:10:00	37	A1	-0.001533333	Blank	DM25-growth
182	30:20:00	37	A1	-0.001583333	Blank	DM25-growth
183	30:30:00	37	A1	-0.000166667	Blank	DM25-growth
184	30:40:00	37	A1	-0.00025	Blank	DM25-growth
185	30:50:00	37	A1	-0.000333333	Blank	DM25-growth
186	31:00:00	37	A1	-0.002183333	Blank	DM25-growth
187	31:10:00	37	A1	-6.67e-05	Blank	DM25-growth
188	31:20:00	37	A1	-0.000116667	Blank	DM25-growth
189	31:30:00	37	A1	-0.000433333	Blank	DM25-growth
190	31:40:00	37	A1	-0.000333333	Blank	DM25-growth
191	31:50:00	37	A1	-0.0001	Blank	DM25-growth
192	32:00:00	37	A1	-0.002116667	Blank	DM25-growth
193	32:10:00	37	A1	-0.001616667	Blank	DM25-growth
194	32:20:00	37	A1	-0.000166667	Blank	DM25-growth
195	32:30:00	37	A1	-5e-05	Blank	DM25-growth
196	32:40:00	37	A1	-0.000183333	Blank	DM25-growth
197	32:50:00	37	A1	-0.002466667	Blank	DM25-growth
198	33:00:00	37	A1	-0.00025	Blank	DM25-growth
199	33:10:00	37	A1	-0.000116667	Blank	DM25-growth
200	33:20:00	37	A1	-0.002633333	Blank	DM25-growth
201	33:30:00	37	A1	0.0055	Blank	DM25-growth
202	33:40:00	37	A1	-0.00115	Blank	DM25-growth
203	33:50:00	37	A1	-5e-05	Blank	DM25-growth
204	34:00:00	37	A1	-0.000316667	Blank	DM25-growth
205	34:10:00	37	A1	-0.000766667	Blank	DM25-growth
206	34:20:00	37	A1	8.33e-05	Blank	DM25-growth
207	34:30:00	37	A1	0.009683333	Blank	DM25-growth
208	34:40:00	37	A1	-0.001433333	Blank	DM25-growth
209	34:50:00	37	A1	-0.000116667	Blank	DM25-growth
210	35:00:00	37	A1	-0.000333333	Blank	DM25-growth
211	35:10:00	37	A1	-8.33e-05	Blank	DM25-growth
212	35:20:00	37	A1	-0.000716667	Blank	DM25-growth
213	35:30:00	37	A1	-0.000316667	Blank	DM25-growth
214	35:40:00	37	A1	-0.000316667	Blank	DM25-growth
215	35:50:00	37	A1	0.000133333	Blank	DM25-growth
216	36:00:00	37	A1	-6.67e-05	Blank	DM25-growth
217	36:10:00	37	A1	-0.000333333	Blank	DM25-growth
218	36:20:00	37	A1	-0.0001	Blank	DM25-growth
219	36:30:00	37	A1	5e-05	Blank	DM25-growth
220	36:40:00	37	A1	-0.00175	Blank	DM25-growth
221	36:50:00	37	A1	-0.00015	Blank	DM25-growth
222	37:00:00	37	A1	-0.000266667	Blank	DM25-growth
223	37:10:00	37	A1	-0.000183333	Blank	DM25-growth
224	37:20:00	37	A1	-0.00035	Blank	DM25-growth
225	37:30:00	37	A1	-0.000133333	Blank	DM25-growth
226	37:40:00	37	A1	-0.0017	Blank	DM25-growth
227	37:50:00	37	A1	-0.001583333	Blank	DM25-growth
228	38:00:00	37	A1	5e-05	Blank	DM25-growth
229	38:10:00	37	A1	-0.002233333	Blank	DM25-growth
230	38:20:00	37	A1	0.000133333	Blank	DM25-growth
231	38:30:00	37	A1	0.012233333	Blank	DM25-growth
232	38:40:00	37	A1	-0.0002	Blank	DM25-growth
233	38:50:00	37	A1	1.67e-05	Blank	DM25-growth
234	39:00:00	37	A1	-0.001566667	Blank	DM25-growth
235	39:10:00	37	A1	-6.67e-05	Blank	DM25-growth
236	39:20:00	37	A1	-0.000216667	Blank	DM25-growth
237	39:30:00	37	A1	-0.0003	Blank	DM25-growth
238	39:40:00	37	A1	6.67e-05	Blank	DM25-growth
239	39:50:00	37	A1	-0.000266667	Blank	DM25-growth
240	40:00:00	37	A1	0.0034	Blank	DM25-growth
241	40:10:00	37	A1	3.33e-05	Blank	DM25-growth
242	40:20:00	37	A1	0.009	Blank	DM25-growth
243	40:30:00	37	A1	-3.33e-05	Blank	DM25-growth
244	40:40:00	37	A1	0.004733333	Blank	DM25-growth
245	40:50:00	37	A1	-5e-05	Blank	DM25-growth
246	41:00:00	37	A1	8.33e-05	Blank	DM25-growth
247	41:10:00	37	A1	0.000116667	Blank	DM25-growth
248	41:20:00	37	A1	-0.00035	Blank	DM25-growth
249	41:30:00	37	A1	-0.00035	Blank	DM25-growth
250	41:40:00	37	A1	-0.0001	Blank	DM25-growth
251	41:50:00	37	A1	-0.000433333	Blank	DM25-growth
252	42:00:00	37	A1	-0.00015	Blank	DM25-growth
253	42:10:00	37	A1	0.00605	Blank	DM25-growth
254	42:20:00	37	A1	-0.00035	Blank	DM25-growth
255	42:30:00	37	A1	-0.00185	Blank	DM25-growth
256	42:40:00	37	A1	-0.002216667	Blank	DM25-growth
257	42:50:00	37	A1	1.39e-17	Blank	DM25-growth
258	43:00:00	37	A1	0.009883333	Blank	DM25-growth
259	43:10:00	37	A1	-0.00025	Blank	DM25-growth
260	43:20:00	37	A1	-0.0016	Blank	DM25-growth
261	43:30:00	37	A1	0.0042	Blank	DM25-growth
262	43:40:00	37	A1	-0.000133333	Blank	DM25-growth
263	43:50:00	37	A1	-0.000166667	Blank	DM25-growth
264	44:00:00	37	A1	-0.000316667	Blank	DM25-growth
265	44:10:00	37	A1	-0.0003	Blank	DM25-growth
266	44:20:00	37	A1	-0.0001	Blank	DM25-growth
267	44:30:00	37	A1	-0.000266667	Blank	DM25-growth
268	44:40:00	37	A1	-8.33e-05	Blank	DM25-growth
269	44:50:00	37	A1	-0.000283333	Blank	DM25-growth
270	45:00:00	37	A1	0.003116667	Blank	DM25-growth
271	45:10:00	37	A1	-6.67e-05	Blank	DM25-growth
272	45:20:00	37	A1	-1.67e-05	Blank	DM25-growth
273	45:30:00	37	A1	-0.00045	Blank	DM25-growth
274	45:40:00	37	A1	-0.000283333	Blank	DM25-growth
275	45:50:00	37	A1	0.004583333	Blank	DM25-growth
276	46:00:00	37	A1	-0.002066667	Blank	DM25-growth
277	46:10:00	37	A1	0.000166667	Blank	DM25-growth
278	46:20:00	37	A1	-0.0001	Blank	DM25-growth
279	46:30:00	37	A1	-5e-05	Blank	DM25-growth
280	46:40:00	37	A1	-0.002183333	Blank	DM25-growth
281	46:50:00	37	A1	0.0057	Blank	DM25-growth
282	47:00:00	37	A1	0.006616667	Blank	DM25-growth
283	47:10:00	37	A1	0.003783333	Blank	DM25-growth
284	47:20:00	37	A1	-1.67e-05	Blank	DM25-growth
285	47:30:00	37	A1	0.005766667	Blank	DM25-growth
286	47:40:00	37	A1	-6.67e-05	Blank	DM25-growth
287	47:50:00	37	A1	0.000533333	Blank	DM25-growth
288	48:00:00	37	A1	-0.000116667	Blank	DM25-growth
289	0:00:00	37	A2	0.001016667	Blank	DM25-growth
290	0:10:00	37	A2	0.000933333	Blank	DM25-growth
291	0:20:00	37	A2	0.00085	Blank	DM25-growth
292	0:30:00	37	A2	0.0012	Blank	DM25-growth
293	0:40:00	37	A2	0.0009	Blank	DM25-growth
294	0:50:00	37	A2	0.00115	Blank	DM25-growth
295	1:00:00	37	A2	0.001083333	Blank	DM25-growth
296	1:10:00	37	A2	0.001116667	Blank	DM25-growth
297	1:20:00	37	A2	0.0011	Blank	DM25-growth
298	1:30:00	37	A2	0.001083333	Blank	DM25-growth
299	1:40:00	37	A2	0.0011	Blank	DM25-growth
300	1:50:00	37	A2	0.00165	Blank	DM25-growth
301	2:00:00	37	A2	0.001533333	Blank	DM25-growth
302	2:10:00	37	A2	0.003033333	Blank	DM25-growth
303	2:20:00	37	A2	0.0018	Blank	DM25-growth
304	2:30:00	37	A2	0.001833333	Blank	DM25-growth
305	2:40:00	37	A2	0.000716667	Blank	DM25-growth
306	2:50:00	37	A2	0.0003	Blank	DM25-growth
307	3:00:00	37	A2	0.00245	Blank	DM25-growth
308	3:10:00	37	A2	-0.0007	Blank	DM25-growth
309	3:20:00	37	A2	-0.00015	Blank	DM25-growth
310	3:30:00	37	A2	0.000283333	Blank	DM25-growth
311	3:40:00	37	A2	0.00035	Blank	DM25-growth
312	3:50:00	37	A2	-0.00055	Blank	DM25-growth
313	4:00:00	37	A2	0.0004	Blank	DM25-growth
314	4:10:00	37	A2	0.001533333	Blank	DM25-growth
315	4:20:00	37	A2	0.0025	Blank	DM25-growth
316	4:30:00	37	A2	0.003783333	Blank	DM25-growth
317	4:40:00	37	A2	0.002833333	Blank	DM25-growth
318	4:50:00	37	A2	0.001866667	Blank	DM25-growth
319	5:00:00	37	A2	0.0009	Blank	DM25-growth
320	5:10:00	37	A2	0.004	Blank	DM25-growth
321	5:20:00	37	A2	0.0066	Blank	DM25-growth
322	5:30:00	37	A2	0.003866667	Blank	DM25-growth
323	5:40:00	37	A2	0.00325	Blank	DM25-growth
324	5:50:00	37	A2	0.003166667	Blank	DM25-growth
325	6:00:00	37	A2	0.003433333	Blank	DM25-growth
326	6:10:00	37	A2	0.003316667	Blank	DM25-growth
327	6:20:00	37	A2	0.002866667	Blank	DM25-growth
328	6:30:00	37	A2	0.00295	Blank	DM25-growth
329	6:40:00	37	A2	0.0034	Blank	DM25-growth
330	6:50:00	37	A2	0.002533333	Blank	DM25-growth
331	7:00:00	37	A2	0.002183333	Blank	DM25-growth
332	7:10:00	37	A2	0.002733333	Blank	DM25-growth
333	7:20:00	37	A2	0.002233333	Blank	DM25-growth
334	7:30:00	37	A2	0.002566667	Blank	DM25-growth
335	7:40:00	37	A2	0.002083333	Blank	DM25-growth
336	7:50:00	37	A2	0.001533333	Blank	DM25-growth
337	8:00:00	37	A2	0.001366667	Blank	DM25-growth
338	8:10:00	37	A2	0.00095	Blank	DM25-growth
339	8:20:00	37	A2	0.000883333	Blank	DM25-growth
340	8:30:00	37	A2	0.00085	Blank	DM25-growth
341	8:40:00	37	A2	0.000766667	Blank	DM25-growth
342	8:50:00	37	A2	0.000516667	Blank	DM25-growth
343	9:00:00	37	A2	0.000266667	Blank	DM25-growth
344	9:10:00	37	A2	0.000433333	Blank	DM25-growth
345	9:20:00	37	A2	0.000166667	Blank	DM25-growth
346	9:30:00	37	A2	1.67e-05	Blank	DM25-growth
347	9:40:00	37	A2	-8.33e-05	Blank	DM25-growth
348	9:50:00	37	A2	0.0	Blank	DM25-growth
349	10:00:00	37	A2	0.00015	Blank	DM25-growth
350	10:10:00	37	A2	0.000366667	Blank	DM25-growth
351	10:20:00	37	A2	5e-05	Blank	DM25-growth
352	10:30:00	37	A2	0.001333333	Blank	DM25-growth
353	10:40:00	37	A2	0.004433333	Blank	DM25-growth
354	10:50:00	37	A2	0.005366667	Blank	DM25-growth
355	11:00:00	37	A2	0.000166667	Blank	DM25-growth
356	11:10:00	37	A2	0.0001	Blank	DM25-growth
357	11:20:00	37	A2	0.0001	Blank	DM25-growth
358	11:30:00	37	A2	0.000466667	Blank	DM25-growth
359	11:40:00	37	A2	0.0006	Blank	DM25-growth
360	11:50:00	37	A2	0.000616667	Blank	DM25-growth
361	12:00:00	37	A2	0.000866667	Blank	DM25-growth
362	12:10:00	37	A2	0.0008	Blank	DM25-growth
363	12:20:00	37	A2	0.00065	Blank	DM25-growth
364	12:30:00	37	A2	0.000766667	Blank	DM25-growth
365	12:40:00	37	A2	0.000566667	Blank	DM25-growth
366	12:50:00	37	A2	0.0011	Blank	DM25-growth
367	13:00:00	37	A2	0.000816667	Blank	DM25-growth
368	13:10:00	37	A2	0.000683333	Blank	DM25-growth
369	13:20:00	37	A2	0.000666667	Blank	DM25-growth
370	13:30:00	37	A2	0.000816667	Blank	DM25-growth
371	13:40:00	37	A2	0.000966667	Blank	DM25-growth
372	13:50:00	37	A2	0.001316667	Blank	DM25-growth
373	14:00:00	37	A2	0.001433333	Blank	DM25-growth
374	14:10:00	37	A2	0.00185	Blank	DM25-growth
375	14:20:00	37	A2	0.0013	Blank	DM25-growth
376	14:30:00	37	A2	0.00175	Blank	DM25-growth
377	14:40:00	37	A2	0.002316667	Blank	DM25-growth
378	14:50:00	37	A2	0.0023	Blank	DM25-growth
379	15:00:00	37	A2	0.002983333	Blank	DM25-growth
380	15:10:00	37	A2	0.003133333	Blank	DM25-growth
381	15:20:00	37	A2	0.003033333	Blank	DM25-growth
382	15:30:00	37	A2	0.003883333	Blank	DM25-growth
383	15:40:00	37	A2	0.004566667	Blank	DM25-growth
384	15:50:00	37	A2	0.003083333	Blank	DM25-growth
385	16:00:00	37	A2	0.004266667	Blank	DM25-growth
386	16:10:00	37	A2	0.003683333	Blank	DM25-growth
387	16:20:00	37	A2	0.00445	Blank	DM25-growth
388	16:30:00	37	A2	0.00295	Blank	DM25-growth
389	16:40:00	37	A2	0.003466667	Blank	DM25-growth
390	16:50:00	37	A2	0.008016667	Blank	DM25-growth
391	17:00:00	37	A2	0.00515	Blank	DM25-growth
392	17:10:00	37	A2	0.004283333	Blank	DM25-growth
393	17:20:00	37	A2	0.004833333	Blank	DM25-growth
394	17:30:00	37	A2	0.008483333	Blank	DM25-growth
395	17:40:00	37	A2	0.0077	Blank	DM25-growth
396	17:50:00	37	A2	0.004083333	Blank	DM25-growth
397	18:00:00	37	A2	0.009833333	Blank	DM25-growth
398	18:10:00	37	A2	0.009166667	Blank	DM25-growth
399	18:20:00	37	A2	0.009033333	Blank	DM25-growth
400	18:30:00	37	A2	0.009566667	Blank	DM25-growth
401	18:40:00	37	A2	0.007916667	Blank	DM25-growth
402	18:50:00	37	A2	0.007283333	Blank	DM25-growth
403	19:00:00	37	A2	0.004833333	Blank	DM25-growth
404	19:10:00	37	A2	0.005983333	Blank	DM25-growth
405	19:20:00	37	A2	0.00685	Blank	DM25-growth
406	19:30:00	37	A2	0.0084	Blank	DM25-growth
407	19:40:00	37	A2	0.009816667	Blank	DM25-growth
408	19:50:00	37	A2	0.007866667	Blank	DM25-growth
409	20:00:00	37	A2	0.007633333	Blank	DM25-growth
410	20:10:00	37	A2	0.007516667	Blank	DM25-growth
411	20:20:00	37	A2	0.005316667	Blank	DM25-growth
412	20:30:00	37	A2	0.007483333	Blank	DM25-growth
413	20:40:00	37	A2	0.007233333	Blank	DM25-growth
414	20:50:00	37	A2	0.006366667	Blank	DM25-growth
415	21:00:00	37	A2	0.0051	Blank	DM25-growth
416	21:10:00	37	A2	0.003133333	Blank	DM25-growth
417	21:20:00	37	A2	0.006633333	Blank	DM25-growth
418	21:30:00	37	A2	0.0018	Blank	DM25-growth
419	21:40:00	37	A2	0.0008	Blank	DM25-growth
420	21:50:00	37	A2	0.004266667	Blank	DM25-growth
421	22:00:00	37	A2	0.005966667	Blank	DM25-growth
422	22:10:00	37	A2	0.004666667	Blank	DM25-growth
423	22:20:00	37	A2	0.005533333	Blank	DM25-growth
424	22:30:00	37	A2	0.0045	Blank	DM25-growth
425	22:40:00	37	A2	0.00185	Blank	DM25-growth
426	22:50:00	37	A2	0.001266667	Blank	DM25-growth
427	23:00:00	37	A2	0.00125	Blank	DM25-growth
428	23:10:00	37	A2	0.00125	Blank	DM25-growth
429	23:20:00	37	A2	0.001216667	Blank	DM25-growth
430	23:30:00	37	A2	-0.000133333	Blank	DM25-growth
431	23:40:00	37	A2	0.00135	Blank	DM25-growth
432	23:50:00	37	A2	0.00105	Blank	DM25-growth
433	24:00:00	37	A2	0.001066667	Blank	DM25-growth
434	24:10:00	37	A2	0.001266667	Blank	DM25-growth
435	24:20:00	37	A2	0.001	Blank	DM25-growth
436	24:30:00	37	A2	1.67e-05	Blank	DM25-growth
437	24:40:00	37	A2	0.001166667	Blank	DM25-growth
438	24:50:00	37	A2	0.001883333	Blank	DM25-growth
439	25:00:00	37	A2	-0.00045	Blank	DM25-growth
440	25:10:00	37	A2	0.001383333	Blank	DM25-growth
441	25:20:00	37	A2	0.001483333	Blank	DM25-growth
442	25:30:00	37	A2	0.001566667	Blank	DM25-growth
443	25:40:00	37	A2	0.001233333	Blank	DM25-growth
444	25:50:00	37	A2	0.001033333	Blank	DM25-growth
445	26:00:00	37	A2	-0.0009	Blank	DM25-growth
446	26:10:00	37	A2	0.000516667	Blank	DM25-growth
447	26:20:00	37	A2	0.001266667	Blank	DM25-growth
448	26:30:00	37	A2	0.001233333	Blank	DM25-growth
449	26:40:00	37	A2	0.000666667	Blank	DM25-growth
450	26:50:00	37	A2	0.001083333	Blank	DM25-growth
451	27:00:00	37	A2	-0.000533333	Blank	DM25-growth
452	27:10:00	37	A2	0.0009	Blank	DM25-growth
453	27:20:00	37	A2	0.001266667	Blank	DM25-growth
454	27:30:00	37	A2	0.0008	Blank	DM25-growth
455	27:40:00	37	A2	0.001316667	Blank	DM25-growth
456	27:50:00	37	A2	0.000916667	Blank	DM25-growth
457	28:00:00	37	A2	0.00115	Blank	DM25-growth
458	28:10:00	37	A2	0.001316667	Blank	DM25-growth
459	28:20:00	37	A2	0.00095	Blank	DM25-growth
460	28:30:00	37	A2	0.00115	Blank	DM25-growth
461	28:40:00	37	A2	0.00105	Blank	DM25-growth
462	28:50:00	37	A2	0.001083333	Blank	DM25-growth
463	29:00:00	37	A2	-0.000433333	Blank	DM25-growth
464	29:10:00	37	A2	-0.001066667	Blank	DM25-growth
465	29:20:00	37	A2	0.00115	Blank	DM25-growth
466	29:30:00	37	A2	-0.000483333	Blank	DM25-growth
467	29:40:00	37	A2	-0.0002	Blank	DM25-growth
468	29:50:00	37	A2	-1.67e-05	Blank	DM25-growth
469	30:00:00	37	A2	0.000666667	Blank	DM25-growth
470	30:10:00	37	A2	-3.33e-05	Blank	DM25-growth
471	30:20:00	37	A2	-0.000483333	Blank	DM25-growth
472	30:30:00	37	A2	0.001233333	Blank	DM25-growth
473	30:40:00	37	A2	0.00135	Blank	DM25-growth
474	30:50:00	37	A2	0.001266667	Blank	DM25-growth
475	31:00:00	37	A2	-0.000483333	Blank	DM25-growth
476	31:10:00	37	A2	0.001233333	Blank	DM25-growth
477	31:20:00	37	A2	0.001283333	Blank	DM25-growth
478	31:30:00	37	A2	0.000966667	Blank	DM25-growth
479	31:40:00	37	A2	0.001266667	Blank	DM25-growth
480	31:50:00	37	A2	0.0012	Blank	DM25-growth
481	32:00:00	37	A2	-0.000916667	Blank	DM25-growth
482	32:10:00	37	A2	-0.000316667	Blank	DM25-growth
483	32:20:00	37	A2	0.001433333	Blank	DM25-growth
484	32:30:00	37	A2	0.00135	Blank	DM25-growth
485	32:40:00	37	A2	0.001016667	Blank	DM25-growth
486	32:50:00	37	A2	-0.000866667	Blank	DM25-growth
487	33:00:00	37	A2	0.00115	Blank	DM25-growth
488	33:10:00	37	A2	0.001283333	Blank	DM25-growth
489	33:20:00	37	A2	-0.001233333	Blank	DM25-growth
490	33:30:00	37	A2	-0.0002	Blank	DM25-growth
491	33:40:00	37	A2	-5e-05	Blank	DM25-growth
492	33:50:00	37	A2	0.00115	Blank	DM25-growth
493	34:00:00	37	A2	0.001183333	Blank	DM25-growth
494	34:10:00	37	A2	0.000633333	Blank	DM25-growth
495	34:20:00	37	A2	0.001383333	Blank	DM25-growth
496	34:30:00	37	A2	-0.000716667	Blank	DM25-growth
497	34:40:00	37	A2	-0.000333333	Blank	DM25-growth
498	34:50:00	37	A2	0.000983333	Blank	DM25-growth
499	35:00:00	37	A2	0.001166667	Blank	DM25-growth
500	35:10:00	37	A2	0.001416667	Blank	DM25-growth
501	35:20:00	37	A2	0.000383333	Blank	DM25-growth
502	35:30:00	37	A2	0.001083333	Blank	DM25-growth
503	35:40:00	37	A2	0.001383333	Blank	DM25-growth
504	35:50:00	37	A2	0.001233333	Blank	DM25-growth
505	36:00:00	37	A2	0.001533333	Blank	DM25-growth
506	36:10:00	37	A2	0.001166667	Blank	DM25-growth
507	36:20:00	37	A2	0.0013	Blank	DM25-growth
508	36:30:00	37	A2	0.00165	Blank	DM25-growth
509	36:40:00	37	A2	-0.00025	Blank	DM25-growth
510	36:50:00	37	A2	0.00175	Blank	DM25-growth
511	37:00:00	37	A2	0.001033333	Blank	DM25-growth
512	37:10:00	37	A2	0.001316667	Blank	DM25-growth
513	37:20:00	37	A2	0.00125	Blank	DM25-growth
514	37:30:00	37	A2	0.001066667	Blank	DM25-growth
515	37:40:00	37	A2	-0.0001	Blank	DM25-growth
516	37:50:00	37	A2	-0.000583333	Blank	DM25-growth
517	38:00:00	37	A2	0.00125	Blank	DM25-growth
518	38:10:00	37	A2	-0.000933333	Blank	DM25-growth
519	38:20:00	37	A2	0.001233333	Blank	DM25-growth
520	38:30:00	37	A2	-0.001266667	Blank	DM25-growth
521	38:40:00	37	A2	0.0017	Blank	DM25-growth
522	38:50:00	37	A2	0.001216667	Blank	DM25-growth
523	39:00:00	37	A2	-0.000466667	Blank	DM25-growth
524	39:10:00	37	A2	0.001133333	Blank	DM25-growth
525	39:20:00	37	A2	0.001083333	Blank	DM25-growth
526	39:30:00	37	A2	0.0023	Blank	DM25-growth
527	39:40:00	37	A2	0.001266667	Blank	DM25-growth
528	39:50:00	37	A2	0.001833333	Blank	DM25-growth
529	40:00:00	37	A2	0.0011	Blank	DM25-growth
530	40:10:00	37	A2	0.001133333	Blank	DM25-growth
531	40:20:00	37	A2	-0.0001	Blank	DM25-growth
532	40:30:00	37	A2	0.001166667	Blank	DM25-growth
533	40:40:00	37	A2	0.000633333	Blank	DM25-growth
534	40:50:00	37	A2	0.00125	Blank	DM25-growth
535	41:00:00	37	A2	0.000283333	Blank	DM25-growth
536	41:10:00	37	A2	0.001316667	Blank	DM25-growth
537	41:20:00	37	A2	0.00345	Blank	DM25-growth
538	41:30:00	37	A2	0.00255	Blank	DM25-growth
539	41:40:00	37	A2	0.0022	Blank	DM25-growth
540	41:50:00	37	A2	0.004166667	Blank	DM25-growth
541	42:00:00	37	A2	0.00135	Blank	DM25-growth
542	42:10:00	37	A2	-0.00135	Blank	DM25-growth
543	42:20:00	37	A2	0.00105	Blank	DM25-growth
544	42:30:00	37	A2	-0.00085	Blank	DM25-growth
545	42:40:00	37	A2	0.002283333	Blank	DM25-growth
546	42:50:00	37	A2	0.0013	Blank	DM25-growth
547	43:00:00	37	A2	-0.001816667	Blank	DM25-growth
548	43:10:00	37	A2	0.00295	Blank	DM25-growth
549	43:20:00	37	A2	0.0014	Blank	DM25-growth
550	43:30:00	37	A2	0.0019	Blank	DM25-growth
551	43:40:00	37	A2	0.001366667	Blank	DM25-growth
552	43:50:00	37	A2	0.001833333	Blank	DM25-growth
553	44:00:00	37	A2	0.002483333	Blank	DM25-growth
554	44:10:00	37	A2	0.0032	Blank	DM25-growth
555	44:20:00	37	A2	0.0019	Blank	DM25-growth
556	44:30:00	37	A2	0.001933333	Blank	DM25-growth
557	44:40:00	37	A2	0.001716667	Blank	DM25-growth
558	44:50:00	37	A2	0.001316667	Blank	DM25-growth
559	45:00:00	37	A2	0.002116667	Blank	DM25-growth
560	45:10:00	37	A2	0.001433333	Blank	DM25-growth
561	45:20:00	37	A2	0.001483333	Blank	DM25-growth
562	45:30:00	37	A2	0.00065	Blank	DM25-growth
563	45:40:00	37	A2	0.001916667	Blank	DM25-growth
564	45:50:00	37	A2	0.000383333	Blank	DM25-growth
565	46:00:00	37	A2	-0.000966667	Blank	DM25-growth
566	46:10:00	37	A2	0.001066667	Blank	DM25-growth
567	46:20:00	37	A2	0.0015	Blank	DM25-growth
568	46:30:00	37	A2	0.00115	Blank	DM25-growth
569	46:40:00	37	A2	-0.000783333	Blank	DM25-growth
570	46:50:00	37	A2	0.0001	Blank	DM25-growth
571	47:00:00	37	A2	-0.000283333	Blank	DM25-growth
572	47:10:00	37	A2	-0.001216667	Blank	DM25-growth
573	47:20:00	37	A2	0.001383333	Blank	DM25-growth
574	47:30:00	37	A2	0.000166667	Blank	DM25-growth
575	47:40:00	37	A2	0.001233333	Blank	DM25-growth
576	47:50:00	37	A2	0.001433333	Blank	DM25-growth
577	48:00:00	37	A2	0.001483333	Blank	DM25-growth
578	0:00:00	37	A3	0.001416667	Blank	DM25-growth
579	0:10:00	37	A3	0.001433333	Blank	DM25-growth
580	0:20:00	37	A3	0.00125	Blank	DM25-growth
581	0:30:00	37	A3	0.0014	Blank	DM25-growth
582	0:40:00	37	A3	0.0013	Blank	DM25-growth
583	0:50:00	37	A3	0.00135	Blank	DM25-growth
584	1:00:00	37	A3	0.001583333	Blank	DM25-growth
585	1:10:00	37	A3	0.001416667	Blank	DM25-growth
586	1:20:00	37	A3	0.0015	Blank	DM25-growth
587	1:30:00	37	A3	0.001383333	Blank	DM25-growth
588	1:40:00	37	A3	0.0013	Blank	DM25-growth
589	1:50:00	37	A3	0.00135	Blank	DM25-growth
590	2:00:00	37	A3	0.001333333	Blank	DM25-growth
591	2:10:00	37	A3	0.001733333	Blank	DM25-growth
592	2:20:00	37	A3	0.0014	Blank	DM25-growth
593	2:30:00	37	A3	0.001033333	Blank	DM25-growth
594	2:40:00	37	A3	0.000516667	Blank	DM25-growth
595	2:50:00	37	A3	0.0002	Blank	DM25-growth
596	3:00:00	37	A3	-0.00095	Blank	DM25-growth
597	3:10:00	37	A3	-0.0006	Blank	DM25-growth
598	3:20:00	37	A3	-0.00095	Blank	DM25-growth
599	3:30:00	37	A3	-0.001016667	Blank	DM25-growth
600	3:40:00	37	A3	-0.00095	Blank	DM25-growth
601	3:50:00	37	A3	-0.00085	Blank	DM25-growth
602	4:00:00	37	A3	-0.0011	Blank	DM25-growth
603	4:10:00	37	A3	-0.001066667	Blank	DM25-growth
604	4:20:00	37	A3	-0.0012	Blank	DM25-growth
605	4:30:00	37	A3	-0.001516667	Blank	DM25-growth
606	4:40:00	37	A3	-0.001366667	Blank	DM25-growth
607	4:50:00	37	A3	-0.001033333	Blank	DM25-growth
608	5:00:00	37	A3	-0.0008	Blank	DM25-growth
609	5:10:00	37	A3	-0.0012	Blank	DM25-growth
610	5:20:00	37	A3	-0.0014	Blank	DM25-growth
611	5:30:00	37	A3	-0.000633333	Blank	DM25-growth
612	5:40:00	37	A3	-0.00035	Blank	DM25-growth
613	5:50:00	37	A3	0.000166667	Blank	DM25-growth
614	6:00:00	37	A3	-6.67e-05	Blank	DM25-growth
615	6:10:00	37	A3	0.000316667	Blank	DM25-growth
616	6:20:00	37	A3	0.000966667	Blank	DM25-growth
617	6:30:00	37	A3	0.00095	Blank	DM25-growth
618	6:40:00	37	A3	0.0009	Blank	DM25-growth
619	6:50:00	37	A3	0.001133333	Blank	DM25-growth
620	7:00:00	37	A3	0.001183333	Blank	DM25-growth
621	7:10:00	37	A3	0.001033333	Blank	DM25-growth
622	7:20:00	37	A3	0.001033333	Blank	DM25-growth
623	7:30:00	37	A3	0.000966667	Blank	DM25-growth
624	7:40:00	37	A3	0.001083333	Blank	DM25-growth
625	7:50:00	37	A3	0.001333333	Blank	DM25-growth
626	8:00:00	37	A3	0.001266667	Blank	DM25-growth
627	8:10:00	37	A3	0.00145	Blank	DM25-growth
628	8:20:00	37	A3	0.001183333	Blank	DM25-growth
629	8:30:00	37	A3	0.00085	Blank	DM25-growth
630	8:40:00	37	A3	0.001066667	Blank	DM25-growth
631	8:50:00	37	A3	0.000616667	Blank	DM25-growth
632	9:00:00	37	A3	0.000666667	Blank	DM25-growth
633	9:10:00	37	A3	0.000433333	Blank	DM25-growth
634	9:20:00	37	A3	0.000466667	Blank	DM25-growth
635	9:30:00	37	A3	0.000316667	Blank	DM25-growth
636	9:40:00	37	A3	0.000316667	Blank	DM25-growth
637	9:50:00	37	A3	0.0003	Blank	DM25-growth
638	10:00:00	37	A3	0.00015	Blank	DM25-growth
639	10:10:00	37	A3	0.000366667	Blank	DM25-growth
640	10:20:00	37	A3	0.00055	Blank	DM25-growth
641	10:30:00	37	A3	0.000333333	Blank	DM25-growth
642	10:40:00	37	A3	-0.000566667	Blank	DM25-growth
643	10:50:00	37	A3	0.001666667	Blank	DM25-growth
644	11:00:00	37	A3	0.001066667	Blank	DM25-growth
645	11:10:00	37	A3	0.0006	Blank	DM25-growth
646	11:20:00	37	A3	0.0006	Blank	DM25-growth
647	11:30:00	37	A3	0.000566667	Blank	DM25-growth
648	11:40:00	37	A3	0.0006	Blank	DM25-growth
649	11:50:00	37	A3	0.000716667	Blank	DM25-growth
650	12:00:00	37	A3	0.000766667	Blank	DM25-growth
651	12:10:00	37	A3	0.0008	Blank	DM25-growth
652	12:20:00	37	A3	0.00055	Blank	DM25-growth
653	12:30:00	37	A3	0.000466667	Blank	DM25-growth
654	12:40:00	37	A3	0.000666667	Blank	DM25-growth
655	12:50:00	37	A3	0.0005	Blank	DM25-growth
656	13:00:00	37	A3	0.000616667	Blank	DM25-growth
657	13:10:00	37	A3	0.000583333	Blank	DM25-growth
658	13:20:00	37	A3	0.000666667	Blank	DM25-growth
659	13:30:00	37	A3	0.000816667	Blank	DM25-growth
660	13:40:00	37	A3	0.000466667	Blank	DM25-growth
661	13:50:00	37	A3	0.000716667	Blank	DM25-growth
662	14:00:00	37	A3	0.000133333	Blank	DM25-growth
663	14:10:00	37	A3	0.00085	Blank	DM25-growth
664	14:20:00	37	A3	0.0002	Blank	DM25-growth
665	14:30:00	37	A3	0.00105	Blank	DM25-growth
666	14:40:00	37	A3	0.000916667	Blank	DM25-growth
667	14:50:00	37	A3	0.001	Blank	DM25-growth
668	15:00:00	37	A3	0.000683333	Blank	DM25-growth
669	15:10:00	37	A3	0.000933333	Blank	DM25-growth
670	15:20:00	37	A3	0.000633333	Blank	DM25-growth
671	15:30:00	37	A3	0.000583333	Blank	DM25-growth
672	15:40:00	37	A3	0.000666667	Blank	DM25-growth
673	15:50:00	37	A3	0.000783333	Blank	DM25-growth
674	16:00:00	37	A3	0.000466667	Blank	DM25-growth
675	16:10:00	37	A3	0.000183333	Blank	DM25-growth
676	16:20:00	37	A3	-0.00065	Blank	DM25-growth
677	16:30:00	37	A3	-0.00055	Blank	DM25-growth
678	16:40:00	37	A3	-0.000533333	Blank	DM25-growth
679	16:50:00	37	A3	-0.001883333	Blank	DM25-growth
680	17:00:00	37	A3	-0.00115	Blank	DM25-growth
681	17:10:00	37	A3	-0.001216667	Blank	DM25-growth
682	17:20:00	37	A3	-0.001866667	Blank	DM25-growth
683	17:30:00	37	A3	-0.002116667	Blank	DM25-growth
684	17:40:00	37	A3	-0.0015	Blank	DM25-growth
685	17:50:00	37	A3	-0.000916667	Blank	DM25-growth
686	18:00:00	37	A3	-0.001966667	Blank	DM25-growth
687	18:10:00	37	A3	-0.001933333	Blank	DM25-growth
688	18:20:00	37	A3	-0.002166667	Blank	DM25-growth
689	18:30:00	37	A3	-0.002133333	Blank	DM25-growth
690	18:40:00	37	A3	-0.001683333	Blank	DM25-growth
691	18:50:00	37	A3	-0.002116667	Blank	DM25-growth
692	19:00:00	37	A3	-0.001866667	Blank	DM25-growth
693	19:10:00	37	A3	-0.001916667	Blank	DM25-growth
694	19:20:00	37	A3	-5e-05	Blank	DM25-growth
695	19:30:00	37	A3	-0.0005	Blank	DM25-growth
696	19:40:00	37	A3	-0.000783333	Blank	DM25-growth
697	19:50:00	37	A3	-0.000133333	Blank	DM25-growth
698	20:00:00	37	A3	-0.000166667	Blank	DM25-growth
699	20:10:00	37	A3	-0.000783333	Blank	DM25-growth
700	20:20:00	37	A3	0.000416667	Blank	DM25-growth
701	20:30:00	37	A3	-0.000416667	Blank	DM25-growth
702	20:40:00	37	A3	-6.67e-05	Blank	DM25-growth
703	20:50:00	37	A3	-0.001333333	Blank	DM25-growth
704	21:00:00	37	A3	0.0002	Blank	DM25-growth
705	21:10:00	37	A3	0.000533333	Blank	DM25-growth
706	21:20:00	37	A3	-6.67e-05	Blank	DM25-growth
707	21:30:00	37	A3	-0.0014	Blank	DM25-growth
708	21:40:00	37	A3	0.0003	Blank	DM25-growth
709	21:50:00	37	A3	0.007666667	Blank	DM25-growth
710	22:00:00	37	A3	0.006166667	Blank	DM25-growth
711	22:10:00	37	A3	0.000366667	Blank	DM25-growth
712	22:20:00	37	A3	0.000333333	Blank	DM25-growth
713	22:30:00	37	A3	0.0005	Blank	DM25-growth
714	22:40:00	37	A3	0.00085	Blank	DM25-growth
715	22:50:00	37	A3	0.001166667	Blank	DM25-growth
716	23:00:00	37	A3	0.00105	Blank	DM25-growth
717	23:10:00	37	A3	0.00115	Blank	DM25-growth
718	23:20:00	37	A3	0.001116667	Blank	DM25-growth
719	23:30:00	37	A3	0.006866667	Blank	DM25-growth
720	23:40:00	37	A3	0.00095	Blank	DM25-growth
721	23:50:00	37	A3	0.00085	Blank	DM25-growth
722	24:00:00	37	A3	0.001066667	Blank	DM25-growth
723	24:10:00	37	A3	0.001166667	Blank	DM25-growth
724	24:20:00	37	A3	0.0011	Blank	DM25-growth
725	24:30:00	37	A3	0.006716667	Blank	DM25-growth
726	24:40:00	37	A3	0.001966667	Blank	DM25-growth
727	24:50:00	37	A3	0.000983333	Blank	DM25-growth
728	25:00:00	37	A3	-0.00085	Blank	DM25-growth
729	25:10:00	37	A3	0.000983333	Blank	DM25-growth
730	25:20:00	37	A3	0.000983333	Blank	DM25-growth
731	25:30:00	37	A3	0.000966667	Blank	DM25-growth
732	25:40:00	37	A3	0.000933333	Blank	DM25-growth
733	25:50:00	37	A3	0.001133333	Blank	DM25-growth
734	26:00:00	37	A3	-0.0008	Blank	DM25-growth
735	26:10:00	37	A3	0.000516667	Blank	DM25-growth
736	26:20:00	37	A3	0.001066667	Blank	DM25-growth
737	26:30:00	37	A3	0.001033333	Blank	DM25-growth
738	26:40:00	37	A3	0.003166667	Blank	DM25-growth
739	26:50:00	37	A3	0.001183333	Blank	DM25-growth
740	27:00:00	37	A3	0.000566667	Blank	DM25-growth
741	27:10:00	37	A3	0.0029	Blank	DM25-growth
742	27:20:00	37	A3	0.001166667	Blank	DM25-growth
743	27:30:00	37	A3	0.0022	Blank	DM25-growth
744	27:40:00	37	A3	0.001316667	Blank	DM25-growth
745	27:50:00	37	A3	0.000716667	Blank	DM25-growth
746	28:00:00	37	A3	0.00115	Blank	DM25-growth
747	28:10:00	37	A3	0.001416667	Blank	DM25-growth
748	28:20:00	37	A3	0.00135	Blank	DM25-growth
749	28:30:00	37	A3	0.00105	Blank	DM25-growth
750	28:40:00	37	A3	0.00115	Blank	DM25-growth
751	28:50:00	37	A3	0.001183333	Blank	DM25-growth
752	29:00:00	37	A3	0.008666667	Blank	DM25-growth
753	29:10:00	37	A3	0.006733333	Blank	DM25-growth
754	29:20:00	37	A3	0.00105	Blank	DM25-growth
755	29:30:00	37	A3	0.009216667	Blank	DM25-growth
756	29:40:00	37	A3	0.0072	Blank	DM25-growth
757	29:50:00	37	A3	0.006683333	Blank	DM25-growth
758	30:00:00	37	A3	0.004166667	Blank	DM25-growth
759	30:10:00	37	A3	0.008466667	Blank	DM25-growth
760	30:20:00	37	A3	0.008416667	Blank	DM25-growth
761	30:30:00	37	A3	0.001333333	Blank	DM25-growth
762	30:40:00	37	A3	0.00115	Blank	DM25-growth
763	30:50:00	37	A3	0.001166667	Blank	DM25-growth
764	31:00:00	37	A3	0.011016667	Blank	DM25-growth
765	31:10:00	37	A3	0.001233333	Blank	DM25-growth
766	31:20:00	37	A3	0.000983333	Blank	DM25-growth
767	31:30:00	37	A3	0.001066667	Blank	DM25-growth
768	31:40:00	37	A3	0.001266667	Blank	DM25-growth
769	31:50:00	37	A3	0.0012	Blank	DM25-growth
770	32:00:00	37	A3	0.011383333	Blank	DM25-growth
771	32:10:00	37	A3	0.007983333	Blank	DM25-growth
772	32:20:00	37	A3	0.001033333	Blank	DM25-growth
773	32:30:00	37	A3	0.00115	Blank	DM25-growth
774	32:40:00	37	A3	0.001116667	Blank	DM25-growth
775	32:50:00	37	A3	0.011833333	Blank	DM25-growth
776	33:00:00	37	A3	0.00105	Blank	DM25-growth
777	33:10:00	37	A3	0.001183333	Blank	DM25-growth
778	33:20:00	37	A3	0.013066667	Blank	DM25-growth
779	33:30:00	37	A3	-0.0002	Blank	DM25-growth
780	33:40:00	37	A3	0.00665	Blank	DM25-growth
781	33:50:00	37	A3	0.00085	Blank	DM25-growth
782	34:00:00	37	A3	0.001183333	Blank	DM25-growth
783	34:10:00	37	A3	0.004933333	Blank	DM25-growth
784	34:20:00	37	A3	0.001183333	Blank	DM25-growth
785	34:30:00	37	A3	-0.001116667	Blank	DM25-growth
786	34:40:00	37	A3	0.008166667	Blank	DM25-growth
787	34:50:00	37	A3	0.001083333	Blank	DM25-growth
788	35:00:00	37	A3	0.001566667	Blank	DM25-growth
789	35:10:00	37	A3	0.001016667	Blank	DM25-growth
790	35:20:00	37	A3	0.004983333	Blank	DM25-growth
791	35:30:00	37	A3	0.001283333	Blank	DM25-growth
792	35:40:00	37	A3	0.001183333	Blank	DM25-growth
793	35:50:00	37	A3	0.001133333	Blank	DM25-growth
794	36:00:00	37	A3	0.000933333	Blank	DM25-growth
795	36:10:00	37	A3	0.001266667	Blank	DM25-growth
796	36:20:00	37	A3	0.0011	Blank	DM25-growth
797	36:30:00	37	A3	0.00105	Blank	DM25-growth
798	36:40:00	37	A3	0.00915	Blank	DM25-growth
799	36:50:00	37	A3	0.00115	Blank	DM25-growth
800	37:00:00	37	A3	0.001933333	Blank	DM25-growth
801	37:10:00	37	A3	0.001516667	Blank	DM25-growth
802	37:20:00	37	A3	0.00175	Blank	DM25-growth
803	37:30:00	37	A3	0.002066667	Blank	DM25-growth
804	37:40:00	37	A3	0.0086	Blank	DM25-growth
805	37:50:00	37	A3	0.010116667	Blank	DM25-growth
806	38:00:00	37	A3	0.00115	Blank	DM25-growth
807	38:10:00	37	A3	0.012066667	Blank	DM25-growth
808	38:20:00	37	A3	0.001133333	Blank	DM25-growth
809	38:30:00	37	A3	-0.001266667	Blank	DM25-growth
810	38:40:00	37	A3	0.0011	Blank	DM25-growth
811	38:50:00	37	A3	0.001216667	Blank	DM25-growth
812	39:00:00	37	A3	0.009233333	Blank	DM25-growth
813	39:10:00	37	A3	0.001233333	Blank	DM25-growth
814	39:20:00	37	A3	0.001283333	Blank	DM25-growth
815	39:30:00	37	A3	0.001	Blank	DM25-growth
816	39:40:00	37	A3	0.001166667	Blank	DM25-growth
817	39:50:00	37	A3	0.001233333	Blank	DM25-growth
818	40:00:00	37	A3	0.0005	Blank	DM25-growth
819	40:10:00	37	A3	0.001333333	Blank	DM25-growth
820	40:20:00	37	A3	-0.0009	Blank	DM25-growth
821	40:30:00	37	A3	0.001166667	Blank	DM25-growth
822	40:40:00	37	A3	0.000133333	Blank	DM25-growth
823	40:50:00	37	A3	0.00125	Blank	DM25-growth
824	41:00:00	37	A3	0.005383333	Blank	DM25-growth
825	41:10:00	37	A3	0.000916667	Blank	DM25-growth
826	41:20:00	37	A3	0.00065	Blank	DM25-growth
827	41:30:00	37	A3	0.00085	Blank	DM25-growth
828	41:40:00	37	A3	0.0009	Blank	DM25-growth
829	41:50:00	37	A3	0.000166667	Blank	DM25-growth
830	42:00:00	37	A3	0.00105	Blank	DM25-growth
831	42:10:00	37	A3	0.00585	Blank	DM25-growth
832	42:20:00	37	A3	0.00245	Blank	DM25-growth
833	42:30:00	37	A3	0.01105	Blank	DM25-growth
834	42:40:00	37	A3	0.008583333	Blank	DM25-growth
835	42:50:00	37	A3	0.001	Blank	DM25-growth
836	43:00:00	37	A3	0.003983333	Blank	DM25-growth
837	43:10:00	37	A3	0.00085	Blank	DM25-growth
838	43:20:00	37	A3	0.0077	Blank	DM25-growth
839	43:30:00	37	A3	0.0	Blank	DM25-growth
840	43:40:00	37	A3	0.001166667	Blank	DM25-growth
841	43:50:00	37	A3	0.000933333	Blank	DM25-growth
842	44:00:00	37	A3	0.000983333	Blank	DM25-growth
843	44:10:00	37	A3	0.0007	Blank	DM25-growth
844	44:20:00	37	A3	0.0011	Blank	DM25-growth
845	44:30:00	37	A3	0.000833333	Blank	DM25-growth
846	44:40:00	37	A3	0.001016667	Blank	DM25-growth
847	44:50:00	37	A3	0.002416667	Blank	DM25-growth
848	45:00:00	37	A3	1.67e-05	Blank	DM25-growth
849	45:10:00	37	A3	0.000933333	Blank	DM25-growth
850	45:20:00	37	A3	0.000883333	Blank	DM25-growth
851	45:30:00	37	A3	0.00635	Blank	DM25-growth
852	45:40:00	37	A3	0.001116667	Blank	DM25-growth
853	45:50:00	37	A3	0.000183333	Blank	DM25-growth
854	46:00:00	37	A3	0.012133333	Blank	DM25-growth
855	46:10:00	37	A3	0.001266667	Blank	DM25-growth
856	46:20:00	37	A3	0.0012	Blank	DM25-growth
857	46:30:00	37	A3	0.00125	Blank	DM25-growth
858	46:40:00	37	A3	0.011416667	Blank	DM25-growth
859	46:50:00	37	A3	-0.0002	Blank	DM25-growth
860	47:00:00	37	A3	-0.000283333	Blank	DM25-growth
861	47:10:00	37	A3	0.007783333	Blank	DM25-growth
862	47:20:00	37	A3	0.001183333	Blank	DM25-growth
863	47:30:00	37	A3	-3.33e-05	Blank	DM25-growth
864	47:40:00	37	A3	0.001033333	Blank	DM25-growth
865	47:50:00	37	A3	0.001033333	Blank	DM25-growth
866	48:00:00	37	A3	0.001083333	Blank	DM25-growth
867	0:00:00	37	A4	0.004316667	CZB151	DM25-growth
868	0:10:00	37	A4	0.004733333	CZB151	DM25-growth
869	0:20:00	37	A4	0.00505	CZB151	DM25-growth
870	0:30:00	37	A4	0.0056	CZB151	DM25-growth
871	0:40:00	37	A4	0.0057	CZB151	DM25-growth
872	0:50:00	37	A4	0.00635	CZB151	DM25-growth
873	1:00:00	37	A4	0.007383333	CZB151	DM25-growth
874	1:10:00	37	A4	0.007916667	CZB151	DM25-growth
875	1:20:00	37	A4	0.0089	CZB151	DM25-growth
876	1:30:00	37	A4	0.009983333	CZB151	DM25-growth
877	1:40:00	37	A4	0.0114	CZB151	DM25-growth
878	1:50:00	37	A4	0.01335	CZB151	DM25-growth
879	2:00:00	37	A4	0.014633333	CZB151	DM25-growth
880	2:10:00	37	A4	0.017133333	CZB151	DM25-growth
881	2:20:00	37	A4	0.0189	CZB151	DM25-growth
882	2:30:00	37	A4	0.020733333	CZB151	DM25-growth
883	2:40:00	37	A4	0.021716667	CZB151	DM25-growth
884	2:50:00	37	A4	0.0224	CZB151	DM25-growth
885	3:00:00	37	A4	0.02195	CZB151	DM25-growth
886	3:10:00	37	A4	0.0241	CZB151	DM25-growth
887	3:20:00	37	A4	0.02595	CZB151	DM25-growth
888	3:30:00	37	A4	0.027883333	CZB151	DM25-growth
889	3:40:00	37	A4	0.02995	CZB151	DM25-growth
890	3:50:00	37	A4	0.03235	CZB151	DM25-growth
891	4:00:00	37	A4	0.0346	CZB151	DM25-growth
892	4:10:00	37	A4	0.036733333	CZB151	DM25-growth
893	4:20:00	37	A4	0.04	CZB151	DM25-growth
894	4:30:00	37	A4	0.042183333	CZB151	DM25-growth
895	4:40:00	37	A4	0.045433333	CZB151	DM25-growth
896	4:50:00	37	A4	0.049766667	CZB151	DM25-growth
897	5:00:00	37	A4	0.0543	CZB151	DM25-growth
898	5:10:00	37	A4	0.0585	CZB151	DM25-growth
899	5:20:00	37	A4	0.064	CZB151	DM25-growth
900	5:30:00	37	A4	0.072166667	CZB151	DM25-growth
901	5:40:00	37	A4	0.07925	CZB151	DM25-growth
902	5:50:00	37	A4	0.088566667	CZB151	DM25-growth
903	6:00:00	37	A4	0.096633333	CZB151	DM25-growth
904	6:10:00	37	A4	0.105616667	CZB151	DM25-growth
905	6:20:00	37	A4	0.113766667	CZB151	DM25-growth
906	6:30:00	37	A4	0.12155	CZB151	DM25-growth
907	6:40:00	37	A4	0.1299	CZB151	DM25-growth
908	6:50:00	37	A4	0.133433333	CZB151	DM25-growth
909	7:00:00	37	A4	0.138083333	CZB151	DM25-growth
910	7:10:00	37	A4	0.147733333	CZB151	DM25-growth
911	7:20:00	37	A4	0.161433333	CZB151	DM25-growth
912	7:30:00	37	A4	0.159366667	CZB151	DM25-growth
913	7:40:00	37	A4	0.171283333	CZB151	DM25-growth
914	7:50:00	37	A4	0.181133333	CZB151	DM25-growth
915	8:00:00	37	A4	0.192366667	CZB151	DM25-growth
916	8:10:00	37	A4	0.19495	CZB151	DM25-growth
917	8:20:00	37	A4	0.199583333	CZB151	DM25-growth
918	8:30:00	37	A4	0.20495	CZB151	DM25-growth
919	8:40:00	37	A4	0.208666667	CZB151	DM25-growth
920	8:50:00	37	A4	0.208416667	CZB151	DM25-growth
921	9:00:00	37	A4	0.211366667	CZB151	DM25-growth
922	9:10:00	37	A4	0.218133333	CZB151	DM25-growth
923	9:20:00	37	A4	0.224866667	CZB151	DM25-growth
924	9:30:00	37	A4	0.225916667	CZB151	DM25-growth
925	9:40:00	37	A4	0.235216667	CZB151	DM25-growth
926	9:50:00	37	A4	0.2396	CZB151	DM25-growth
927	10:00:00	37	A4	0.25785	CZB151	DM25-growth
928	10:10:00	37	A4	0.269266667	CZB151	DM25-growth
929	10:20:00	37	A4	0.28805	CZB151	DM25-growth
930	10:30:00	37	A4	0.289433333	CZB151	DM25-growth
931	10:40:00	37	A4	0.300333333	CZB151	DM25-growth
932	10:50:00	37	A4	0.297466667	CZB151	DM25-growth
933	11:00:00	37	A4	0.309566667	CZB151	DM25-growth
934	11:10:00	37	A4	0.3185	CZB151	DM25-growth
935	11:20:00	37	A4	0.3089	CZB151	DM25-growth
936	11:30:00	37	A4	0.294866667	CZB151	DM25-growth
937	11:40:00	37	A4	0.2869	CZB151	DM25-growth
938	11:50:00	37	A4	0.269316667	CZB151	DM25-growth
939	12:00:00	37	A4	0.251266667	CZB151	DM25-growth
940	12:10:00	37	A4	0.2323	CZB151	DM25-growth
941	12:20:00	37	A4	0.21265	CZB151	DM25-growth
942	12:30:00	37	A4	0.197866667	CZB151	DM25-growth
943	12:40:00	37	A4	0.188266667	CZB151	DM25-growth
944	12:50:00	37	A4	0.2	CZB151	DM25-growth
945	13:00:00	37	A4	0.188616667	CZB151	DM25-growth
946	13:10:00	37	A4	0.178883333	CZB151	DM25-growth
947	13:20:00	37	A4	0.174166667	CZB151	DM25-growth
948	13:30:00	37	A4	0.171116667	CZB151	DM25-growth
949	13:40:00	37	A4	0.153566667	CZB151	DM25-growth
950	13:50:00	37	A4	0.146916667	CZB151	DM25-growth
951	14:00:00	37	A4	0.141933333	CZB151	DM25-growth
952	14:10:00	37	A4	0.14145	CZB151	DM25-growth
953	14:20:00	37	A4	0.1268	CZB151	DM25-growth
954	14:30:00	37	A4	0.12555	CZB151	DM25-growth
955	14:40:00	37	A4	0.123316667	CZB151	DM25-growth
956	14:50:00	37	A4	0.1207	CZB151	DM25-growth
957	15:00:00	37	A4	0.115683333	CZB151	DM25-growth
958	15:10:00	37	A4	0.115733333	CZB151	DM25-growth
959	15:20:00	37	A4	0.111433333	CZB151	DM25-growth
960	15:30:00	37	A4	0.111383333	CZB151	DM25-growth
961	15:40:00	37	A4	0.110266667	CZB151	DM25-growth
962	15:50:00	37	A4	0.126283333	CZB151	DM25-growth
963	16:00:00	37	A4	0.122766667	CZB151	DM25-growth
964	16:10:00	37	A4	0.124683333	CZB151	DM25-growth
965	16:20:00	37	A4	0.12545	CZB151	DM25-growth
966	16:30:00	37	A4	0.14025	CZB151	DM25-growth
967	16:40:00	37	A4	0.150666667	CZB151	DM25-growth
968	16:50:00	37	A4	0.142316667	CZB151	DM25-growth
969	17:00:00	37	A4	0.14855	CZB151	DM25-growth
970	17:10:00	37	A4	0.143783333	CZB151	DM25-growth
971	17:20:00	37	A4	0.149433333	CZB151	DM25-growth
972	17:30:00	37	A4	0.146383333	CZB151	DM25-growth
973	17:40:00	37	A4	0.1579	CZB151	DM25-growth
974	17:50:00	37	A4	0.162883333	CZB151	DM25-growth
975	18:00:00	37	A4	0.148733333	CZB151	DM25-growth
976	18:10:00	37	A4	0.139866667	CZB151	DM25-growth
977	18:20:00	37	A4	0.143533333	CZB151	DM25-growth
978	18:30:00	37	A4	0.137866667	CZB151	DM25-growth
979	18:40:00	37	A4	0.137016667	CZB151	DM25-growth
980	18:50:00	37	A4	0.143383333	CZB151	DM25-growth
981	19:00:00	37	A4	0.160233333	CZB151	DM25-growth
982	19:10:00	37	A4	0.168383333	CZB151	DM25-growth
983	19:20:00	37	A4	0.15445	CZB151	DM25-growth
984	19:30:00	37	A4	0.1418	CZB151	DM25-growth
985	19:40:00	37	A4	0.157616667	CZB151	DM25-growth
986	19:50:00	37	A4	0.151966667	CZB151	DM25-growth
987	20:00:00	37	A4	0.137633333	CZB151	DM25-growth
988	20:10:00	37	A4	0.132516667	CZB151	DM25-growth
989	20:20:00	37	A4	0.126916667	CZB151	DM25-growth
990	20:30:00	37	A4	0.134083333	CZB151	DM25-growth
991	20:40:00	37	A4	0.132533333	CZB151	DM25-growth
992	20:50:00	37	A4	0.130666667	CZB151	DM25-growth
993	21:00:00	37	A4	0.1359	CZB151	DM25-growth
994	21:10:00	37	A4	0.139133333	CZB151	DM25-growth
995	21:20:00	37	A4	0.147833333	CZB151	DM25-growth
996	21:30:00	37	A4	0.1435	CZB151	DM25-growth
997	21:40:00	37	A4	0.1338	CZB151	DM25-growth
998	21:50:00	37	A4	0.153166667	CZB151	DM25-growth
999	22:00:00	37	A4	0.150466667	CZB151	DM25-growth
1000	22:10:00	37	A4	0.161666667	CZB151	DM25-growth
1001	22:20:00	37	A4	0.155433333	CZB151	DM25-growth
1002	22:30:00	37	A4	0.1584	CZB151	DM25-growth
1003	22:40:00	37	A4	0.17415	CZB151	DM25-growth
1004	22:50:00	37	A4	0.191866667	CZB151	DM25-growth
1005	23:00:00	37	A4	0.21125	CZB151	DM25-growth
1006	23:10:00	37	A4	0.17005	CZB151	DM25-growth
1007	23:20:00	37	A4	0.157516667	CZB151	DM25-growth
1008	23:30:00	37	A4	0.206966667	CZB151	DM25-growth
1009	23:40:00	37	A4	0.18075	CZB151	DM25-growth
1010	23:50:00	37	A4	0.20725	CZB151	DM25-growth
1011	24:00:00	37	A4	0.221766667	CZB151	DM25-growth
1012	24:10:00	37	A4	0.242766667	CZB151	DM25-growth
1013	24:20:00	37	A4	0.2503	CZB151	DM25-growth
1014	24:30:00	37	A4	0.252716667	CZB151	DM25-growth
1015	24:40:00	37	A4	0.275066667	CZB151	DM25-growth
1016	24:50:00	37	A4	0.283083333	CZB151	DM25-growth
1017	25:00:00	37	A4	0.32585	CZB151	DM25-growth
1018	25:10:00	37	A4	0.311783333	CZB151	DM25-growth
1019	25:20:00	37	A4	0.308483333	CZB151	DM25-growth
1020	25:30:00	37	A4	0.292866667	CZB151	DM25-growth
1021	25:40:00	37	A4	0.300533333	CZB151	DM25-growth
1022	25:50:00	37	A4	0.296833333	CZB151	DM25-growth
1023	26:00:00	37	A4	0.2886	CZB151	DM25-growth
1024	26:10:00	37	A4	0.296716667	CZB151	DM25-growth
1025	26:20:00	37	A4	0.285166667	CZB151	DM25-growth
1026	26:30:00	37	A4	0.282633333	CZB151	DM25-growth
1027	26:40:00	37	A4	0.265166667	CZB151	DM25-growth
1028	26:50:00	37	A4	0.279783333	CZB151	DM25-growth
1029	27:00:00	37	A4	0.258366667	CZB151	DM25-growth
1030	27:10:00	37	A4	0.2453	CZB151	DM25-growth
1031	27:20:00	37	A4	0.226266667	CZB151	DM25-growth
1032	27:30:00	37	A4	0.2259	CZB151	DM25-growth
1033	27:40:00	37	A4	0.209116667	CZB151	DM25-growth
1034	27:50:00	37	A4	0.222016667	CZB151	DM25-growth
1035	28:00:00	37	A4	0.20365	CZB151	DM25-growth
1036	28:10:00	37	A4	0.212616667	CZB151	DM25-growth
1037	28:20:00	37	A4	0.19945	CZB151	DM25-growth
1038	28:30:00	37	A4	0.20225	CZB151	DM25-growth
1039	28:40:00	37	A4	0.19615	CZB151	DM25-growth
1040	28:50:00	37	A4	0.194083333	CZB151	DM25-growth
1041	29:00:00	37	A4	0.203766667	CZB151	DM25-growth
1042	29:10:00	37	A4	0.187933333	CZB151	DM25-growth
1043	29:20:00	37	A4	0.18745	CZB151	DM25-growth
1044	29:30:00	37	A4	0.183416667	CZB151	DM25-growth
1045	29:40:00	37	A4	0.1824	CZB151	DM25-growth
1046	29:50:00	37	A4	0.180183333	CZB151	DM25-growth
1047	30:00:00	37	A4	0.201666667	CZB151	DM25-growth
1048	30:10:00	37	A4	0.187466667	CZB151	DM25-growth
1049	30:20:00	37	A4	0.178016667	CZB151	DM25-growth
1050	30:30:00	37	A4	0.179233333	CZB151	DM25-growth
1051	30:40:00	37	A4	0.17865	CZB151	DM25-growth
1052	30:50:00	37	A4	0.175866667	CZB151	DM25-growth
1053	31:00:00	37	A4	0.176616667	CZB151	DM25-growth
1054	31:10:00	37	A4	0.181333333	CZB151	DM25-growth
1055	31:20:00	37	A4	0.175883333	CZB151	DM25-growth
1056	31:30:00	37	A4	0.175366667	CZB151	DM25-growth
1057	31:40:00	37	A4	0.174066667	CZB151	DM25-growth
1058	31:50:00	37	A4	0.1738	CZB151	DM25-growth
1059	32:00:00	37	A4	0.169583333	CZB151	DM25-growth
1060	32:10:00	37	A4	0.172083333	CZB151	DM25-growth
1061	32:20:00	37	A4	0.173833333	CZB151	DM25-growth
1062	32:30:00	37	A4	0.16775	CZB151	DM25-growth
1063	32:40:00	37	A4	0.175316667	CZB151	DM25-growth
1064	32:50:00	37	A4	0.162633333	CZB151	DM25-growth
1065	33:00:00	37	A4	0.17125	CZB151	DM25-growth
1066	33:10:00	37	A4	0.163683333	CZB151	DM25-growth
1067	33:20:00	37	A4	0.163966667	CZB151	DM25-growth
1068	33:30:00	37	A4	0.1686	CZB151	DM25-growth
1069	33:40:00	37	A4	0.17395	CZB151	DM25-growth
1070	33:50:00	37	A4	0.19035	CZB151	DM25-growth
1071	34:00:00	37	A4	0.168583333	CZB151	DM25-growth
1072	34:10:00	37	A4	0.168533333	CZB151	DM25-growth
1073	34:20:00	37	A4	0.186283333	CZB151	DM25-growth
1074	34:30:00	37	A4	0.169083333	CZB151	DM25-growth
1075	34:40:00	37	A4	0.170766667	CZB151	DM25-growth
1076	34:50:00	37	A4	0.167083333	CZB151	DM25-growth
1077	35:00:00	37	A4	0.166766667	CZB151	DM25-growth
1078	35:10:00	37	A4	0.163816667	CZB151	DM25-growth
1079	35:20:00	37	A4	0.164083333	CZB151	DM25-growth
1080	35:30:00	37	A4	0.165083333	CZB151	DM25-growth
1081	35:40:00	37	A4	0.163983333	CZB151	DM25-growth
1082	35:50:00	37	A4	0.159533333	CZB151	DM25-growth
1083	36:00:00	37	A4	0.162033333	CZB151	DM25-growth
1084	36:10:00	37	A4	0.164266667	CZB151	DM25-growth
1085	36:20:00	37	A4	0.1634	CZB151	DM25-growth
1086	36:30:00	37	A4	0.16775	CZB151	DM25-growth
1087	36:40:00	37	A4	0.16245	CZB151	DM25-growth
1088	36:50:00	37	A4	0.16445	CZB151	DM25-growth
1089	37:00:00	37	A4	0.179733333	CZB151	DM25-growth
1090	37:10:00	37	A4	0.166416667	CZB151	DM25-growth
1091	37:20:00	37	A4	0.16165	CZB151	DM25-growth
1092	37:30:00	37	A4	0.166766667	CZB151	DM25-growth
1093	37:40:00	37	A4	0.1634	CZB151	DM25-growth
1094	37:50:00	37	A4	0.161216667	CZB151	DM25-growth
1095	38:00:00	37	A4	0.17865	CZB151	DM25-growth
1096	38:10:00	37	A4	0.160566667	CZB151	DM25-growth
1097	38:20:00	37	A4	0.158933333	CZB151	DM25-growth
1098	38:30:00	37	A4	0.157333333	CZB151	DM25-growth
1099	38:40:00	37	A4	0.1664	CZB151	DM25-growth
1100	38:50:00	37	A4	0.157116667	CZB151	DM25-growth
1101	39:00:00	37	A4	0.170933333	CZB151	DM25-growth
1102	39:10:00	37	A4	0.159133333	CZB151	DM25-growth
1103	39:20:00	37	A4	0.184283333	CZB151	DM25-growth
1104	39:30:00	37	A4	0.1617	CZB151	DM25-growth
1105	39:40:00	37	A4	0.167366667	CZB151	DM25-growth
1106	39:50:00	37	A4	0.177333333	CZB151	DM25-growth
1107	40:00:00	37	A4	0.1638	CZB151	DM25-growth
1108	40:10:00	37	A4	0.161033333	CZB151	DM25-growth
1109	40:20:00	37	A4	0.1769	CZB151	DM25-growth
1110	40:30:00	37	A4	0.165866667	CZB151	DM25-growth
1111	40:40:00	37	A4	0.158133333	CZB151	DM25-growth
1112	40:50:00	37	A4	0.16205	CZB151	DM25-growth
1113	41:00:00	37	A4	0.169883333	CZB151	DM25-growth
1114	41:10:00	37	A4	0.164116667	CZB151	DM25-growth
1115	41:20:00	37	A4	0.16195	CZB151	DM25-growth
1116	41:30:00	37	A4	0.17495	CZB151	DM25-growth
1117	41:40:00	37	A4	0.1577	CZB151	DM25-growth
1118	41:50:00	37	A4	0.159366667	CZB151	DM25-growth
1119	42:00:00	37	A4	0.16925	CZB151	DM25-growth
1120	42:10:00	37	A4	0.16105	CZB151	DM25-growth
1121	42:20:00	37	A4	0.17375	CZB151	DM25-growth
1122	42:30:00	37	A4	0.15815	CZB151	DM25-growth
1123	42:40:00	37	A4	0.155183333	CZB151	DM25-growth
1124	42:50:00	37	A4	0.1595	CZB151	DM25-growth
1125	43:00:00	37	A4	0.156183333	CZB151	DM25-growth
1126	43:10:00	37	A4	0.15835	CZB151	DM25-growth
1127	43:20:00	37	A4	0.158	CZB151	DM25-growth
1128	43:30:00	37	A4	0.1616	CZB151	DM25-growth
1129	43:40:00	37	A4	0.160366667	CZB151	DM25-growth
1130	43:50:00	37	A4	0.162833333	CZB151	DM25-growth
1131	44:00:00	37	A4	0.162683333	CZB151	DM25-growth
1132	44:10:00	37	A4	0.1634	CZB151	DM25-growth
1133	44:20:00	37	A4	0.1621	CZB151	DM25-growth
1134	44:30:00	37	A4	0.159533333	CZB151	DM25-growth
1135	44:40:00	37	A4	0.158816667	CZB151	DM25-growth
1136	44:50:00	37	A4	0.160016667	CZB151	DM25-growth
1137	45:00:00	37	A4	0.157816667	CZB151	DM25-growth
1138	45:10:00	37	A4	0.172733333	CZB151	DM25-growth
1139	45:20:00	37	A4	0.161083333	CZB151	DM25-growth
1140	45:30:00	37	A4	0.17115	CZB151	DM25-growth
1141	45:40:00	37	A4	0.161616667	CZB151	DM25-growth
1142	45:50:00	37	A4	0.159883333	CZB151	DM25-growth
1143	46:00:00	37	A4	0.157933333	CZB151	DM25-growth
1144	46:10:00	37	A4	0.159466667	CZB151	DM25-growth
1145	46:20:00	37	A4	0.159	CZB151	DM25-growth
1146	46:30:00	37	A4	0.15895	CZB151	DM25-growth
1147	46:40:00	37	A4	0.161416667	CZB151	DM25-growth
1148	46:50:00	37	A4	0.1568	CZB151	DM25-growth
1149	47:00:00	37	A4	0.157616667	CZB151	DM25-growth
1150	47:10:00	37	A4	0.156483333	CZB151	DM25-growth
1151	47:20:00	37	A4	0.157683333	CZB151	DM25-growth
1152	47:30:00	37	A4	0.154666667	CZB151	DM25-growth
1153	47:40:00	37	A4	0.156133333	CZB151	DM25-growth
1154	47:50:00	37	A4	0.162933333	CZB151	DM25-growth
1155	48:00:00	37	A4	0.159683333	CZB151	DM25-growth
1156	0:00:00	37	A5	0.003916667	CZB151	DM25-growth
1157	0:10:00	37	A5	0.004333333	CZB151	DM25-growth
1158	0:20:00	37	A5	0.00465	CZB151	DM25-growth
1159	0:30:00	37	A5	0.0097	CZB151	DM25-growth
1160	0:40:00	37	A5	0.0177	CZB151	DM25-growth
1161	0:50:00	37	A5	0.02445	CZB151	DM25-growth
1162	1:00:00	37	A5	0.020383333	CZB151	DM25-growth
1163	1:10:00	37	A5	0.016616667	CZB151	DM25-growth
1164	1:20:00	37	A5	0.0093	CZB151	DM25-growth
1165	1:30:00	37	A5	0.009883333	CZB151	DM25-growth
1166	1:40:00	37	A5	0.0116	CZB151	DM25-growth
1167	1:50:00	37	A5	0.01305	CZB151	DM25-growth
1168	2:00:00	37	A5	0.014733333	CZB151	DM25-growth
1169	2:10:00	37	A5	0.016733333	CZB151	DM25-growth
1170	2:20:00	37	A5	0.019	CZB151	DM25-growth
1171	2:30:00	37	A5	0.020733333	CZB151	DM25-growth
1172	2:40:00	37	A5	0.022016667	CZB151	DM25-growth
1173	2:50:00	37	A5	0.0226	CZB151	DM25-growth
1174	3:00:00	37	A5	0.02855	CZB151	DM25-growth
1175	3:10:00	37	A5	0.025	CZB151	DM25-growth
1176	3:20:00	37	A5	0.02695	CZB151	DM25-growth
1177	3:30:00	37	A5	0.029683333	CZB151	DM25-growth
1178	3:40:00	37	A5	0.03265	CZB151	DM25-growth
1179	3:50:00	37	A5	0.03625	CZB151	DM25-growth
1180	4:00:00	37	A5	0.0403	CZB151	DM25-growth
1181	4:10:00	37	A5	0.043833333	CZB151	DM25-growth
1182	4:20:00	37	A5	0.0482	CZB151	DM25-growth
1183	4:30:00	37	A5	0.053583333	CZB151	DM25-growth
1184	4:40:00	37	A5	0.058933333	CZB151	DM25-growth
1185	4:50:00	37	A5	0.078266667	CZB151	DM25-growth
1186	5:00:00	37	A5	0.0869	CZB151	DM25-growth
1187	5:10:00	37	A5	0.0992	CZB151	DM25-growth
1188	5:20:00	37	A5	0.1096	CZB151	DM25-growth
1189	5:30:00	37	A5	0.123366667	CZB151	DM25-growth
1190	5:40:00	37	A5	0.12305	CZB151	DM25-growth
1191	5:50:00	37	A5	0.139666667	CZB151	DM25-growth
1192	6:00:00	37	A5	0.131433333	CZB151	DM25-growth
1193	6:10:00	37	A5	0.150816667	CZB151	DM25-growth
1194	6:20:00	37	A5	0.133466667	CZB151	DM25-growth
1195	6:30:00	37	A5	0.13875	CZB151	DM25-growth
1196	6:40:00	37	A5	0.1349	CZB151	DM25-growth
1197	6:50:00	37	A5	0.141833333	CZB151	DM25-growth
1198	7:00:00	37	A5	0.138283333	CZB151	DM25-growth
1199	7:10:00	37	A5	0.175333333	CZB151	DM25-growth
1200	7:20:00	37	A5	0.150833333	CZB151	DM25-growth
1201	7:30:00	37	A5	0.200466667	CZB151	DM25-growth
1202	7:40:00	37	A5	0.151183333	CZB151	DM25-growth
1203	7:50:00	37	A5	0.151133333	CZB151	DM25-growth
1204	8:00:00	37	A5	0.151466667	CZB151	DM25-growth
1205	8:10:00	37	A5	0.15965	CZB151	DM25-growth
1206	8:20:00	37	A5	0.159283333	CZB151	DM25-growth
1207	8:30:00	37	A5	0.17795	CZB151	DM25-growth
1208	8:40:00	37	A5	0.154866667	CZB151	DM25-growth
1209	8:50:00	37	A5	0.151416667	CZB151	DM25-growth
1210	9:00:00	37	A5	0.162166667	CZB151	DM25-growth
1211	9:10:00	37	A5	0.155533333	CZB151	DM25-growth
1212	9:20:00	37	A5	0.153066667	CZB151	DM25-growth
1213	9:30:00	37	A5	0.155616667	CZB151	DM25-growth
1214	9:40:00	37	A5	0.158116667	CZB151	DM25-growth
1215	9:50:00	37	A5	0.1728	CZB151	DM25-growth
1216	10:00:00	37	A5	0.18275	CZB151	DM25-growth
1217	10:10:00	37	A5	0.198966667	CZB151	DM25-growth
1218	10:20:00	37	A5	0.24735	CZB151	DM25-growth
1219	10:30:00	37	A5	0.199033333	CZB151	DM25-growth
1220	10:40:00	37	A5	0.188733333	CZB151	DM25-growth
1221	10:50:00	37	A5	0.189766667	CZB151	DM25-growth
1222	11:00:00	37	A5	0.181966667	CZB151	DM25-growth
1223	11:10:00	37	A5	0.2033	CZB151	DM25-growth
1224	11:20:00	37	A5	0.1762	CZB151	DM25-growth
1225	11:30:00	37	A5	0.179266667	CZB151	DM25-growth
1226	11:40:00	37	A5	0.1844	CZB151	DM25-growth
1227	11:50:00	37	A5	0.186516667	CZB151	DM25-growth
1228	12:00:00	37	A5	0.180266667	CZB151	DM25-growth
1229	12:10:00	37	A5	0.1768	CZB151	DM25-growth
1230	12:20:00	37	A5	0.17365	CZB151	DM25-growth
1231	12:30:00	37	A5	0.172266667	CZB151	DM25-growth
1232	12:40:00	37	A5	0.173966667	CZB151	DM25-growth
1233	12:50:00	37	A5	0.1667	CZB151	DM25-growth
1234	13:00:00	37	A5	0.176316667	CZB151	DM25-growth
1235	13:10:00	37	A5	0.166483333	CZB151	DM25-growth
1236	13:20:00	37	A5	0.168466667	CZB151	DM25-growth
1237	13:30:00	37	A5	0.164816667	CZB151	DM25-growth
1238	13:40:00	37	A5	0.166266667	CZB151	DM25-growth
1239	13:50:00	37	A5	0.169216667	CZB151	DM25-growth
1240	14:00:00	37	A5	0.167333333	CZB151	DM25-growth
1241	14:10:00	37	A5	0.18725	CZB151	DM25-growth
1242	14:20:00	37	A5	0.1625	CZB151	DM25-growth
1243	14:30:00	37	A5	0.16645	CZB151	DM25-growth
1244	14:40:00	37	A5	0.161916667	CZB151	DM25-growth
1245	14:50:00	37	A5	0.1618	CZB151	DM25-growth
1246	15:00:00	37	A5	0.163983333	CZB151	DM25-growth
1247	15:10:00	37	A5	0.161633333	CZB151	DM25-growth
1248	15:20:00	37	A5	0.164533333	CZB151	DM25-growth
1249	15:30:00	37	A5	0.167683333	CZB151	DM25-growth
1250	15:40:00	37	A5	0.160866667	CZB151	DM25-growth
1251	15:50:00	37	A5	0.170483333	CZB151	DM25-growth
1252	16:00:00	37	A5	0.161066667	CZB151	DM25-growth
1253	16:10:00	37	A5	0.168383333	CZB151	DM25-growth
1254	16:20:00	37	A5	0.17245	CZB151	DM25-growth
1255	16:30:00	37	A5	0.15685	CZB151	DM25-growth
1256	16:40:00	37	A5	0.157066667	CZB151	DM25-growth
1257	16:50:00	37	A5	0.158116667	CZB151	DM25-growth
1258	17:00:00	37	A5	0.15535	CZB151	DM25-growth
1259	17:10:00	37	A5	0.162683333	CZB151	DM25-growth
1260	17:20:00	37	A5	0.154333333	CZB151	DM25-growth
1261	17:30:00	37	A5	0.159683333	CZB151	DM25-growth
1262	17:40:00	37	A5	0.1546	CZB151	DM25-growth
1263	17:50:00	37	A5	0.156283333	CZB151	DM25-growth
1264	18:00:00	37	A5	0.153633333	CZB151	DM25-growth
1265	18:10:00	37	A5	0.153066667	CZB151	DM25-growth
1266	18:20:00	37	A5	0.155433333	CZB151	DM25-growth
1267	18:30:00	37	A5	0.154066667	CZB151	DM25-growth
1268	18:40:00	37	A5	0.154516667	CZB151	DM25-growth
1269	18:50:00	37	A5	0.152083333	CZB151	DM25-growth
1270	19:00:00	37	A5	0.153033333	CZB151	DM25-growth
1271	19:10:00	37	A5	0.151983333	CZB151	DM25-growth
1272	19:20:00	37	A5	0.15965	CZB151	DM25-growth
1273	19:30:00	37	A5	0.1564	CZB151	DM25-growth
1274	19:40:00	37	A5	0.154216667	CZB151	DM25-growth
1275	19:50:00	37	A5	0.153366667	CZB151	DM25-growth
1276	20:00:00	37	A5	0.153533333	CZB151	DM25-growth
1277	20:10:00	37	A5	0.152416667	CZB151	DM25-growth
1278	20:20:00	37	A5	0.154816667	CZB151	DM25-growth
1279	20:30:00	37	A5	0.158383333	CZB151	DM25-growth
1280	20:40:00	37	A5	0.157133333	CZB151	DM25-growth
1281	20:50:00	37	A5	0.152466667	CZB151	DM25-growth
1282	21:00:00	37	A5	0.165	CZB151	DM25-growth
1283	21:10:00	37	A5	0.151933333	CZB151	DM25-growth
1284	21:20:00	37	A5	0.152333333	CZB151	DM25-growth
1285	21:30:00	37	A5	0.1514	CZB151	DM25-growth
1286	21:40:00	37	A5	0.1527	CZB151	DM25-growth
1287	21:50:00	37	A5	0.155066667	CZB151	DM25-growth
1288	22:00:00	37	A5	0.153266667	CZB151	DM25-growth
1289	22:10:00	37	A5	0.155666667	CZB151	DM25-growth
1290	22:20:00	37	A5	0.151333333	CZB151	DM25-growth
1291	22:30:00	37	A5	0.1522	CZB151	DM25-growth
1292	22:40:00	37	A5	0.15855	CZB151	DM25-growth
1293	22:50:00	37	A5	0.150366667	CZB151	DM25-growth
1294	23:00:00	37	A5	0.15125	CZB151	DM25-growth
1295	23:10:00	37	A5	0.15255	CZB151	DM25-growth
1296	23:20:00	37	A5	0.154316667	CZB151	DM25-growth
1297	23:30:00	37	A5	0.151666667	CZB151	DM25-growth
1298	23:40:00	37	A5	0.15265	CZB151	DM25-growth
1299	23:50:00	37	A5	0.15365	CZB151	DM25-growth
1300	24:00:00	37	A5	0.160666667	CZB151	DM25-growth
1301	24:10:00	37	A5	0.155466667	CZB151	DM25-growth
1302	24:20:00	37	A5	0.1517	CZB151	DM25-growth
1303	24:30:00	37	A5	0.150916667	CZB151	DM25-growth
1304	24:40:00	37	A5	0.150266667	CZB151	DM25-growth
1305	24:50:00	37	A5	0.151083333	CZB151	DM25-growth
1306	25:00:00	37	A5	0.14825	CZB151	DM25-growth
1307	25:10:00	37	A5	0.150583333	CZB151	DM25-growth
1308	25:20:00	37	A5	0.150183333	CZB151	DM25-growth
1309	25:30:00	37	A5	0.149066667	CZB151	DM25-growth
1310	25:40:00	37	A5	0.152533333	CZB151	DM25-growth
1311	25:50:00	37	A5	0.150333333	CZB151	DM25-growth
1312	26:00:00	37	A5	0.1474	CZB151	DM25-growth
1313	26:10:00	37	A5	0.148716667	CZB151	DM25-growth
1314	26:20:00	37	A5	0.149966667	CZB151	DM25-growth
1315	26:30:00	37	A5	0.151333333	CZB151	DM25-growth
1316	26:40:00	37	A5	0.154066667	CZB151	DM25-growth
1317	26:50:00	37	A5	0.155483333	CZB151	DM25-growth
1318	27:00:00	37	A5	0.150766667	CZB151	DM25-growth
1319	27:10:00	37	A5	0.1507	CZB151	DM25-growth
1320	27:20:00	37	A5	0.149266667	CZB151	DM25-growth
1321	27:30:00	37	A5	0.1496	CZB151	DM25-growth
1322	27:40:00	37	A5	0.149516667	CZB151	DM25-growth
1323	27:50:00	37	A5	0.148716667	CZB151	DM25-growth
1324	28:00:00	37	A5	0.14745	CZB151	DM25-growth
1325	28:10:00	37	A5	0.149616667	CZB151	DM25-growth
1326	28:20:00	37	A5	0.14685	CZB151	DM25-growth
1327	28:30:00	37	A5	0.15005	CZB151	DM25-growth
1328	28:40:00	37	A5	0.14785	CZB151	DM25-growth
1329	28:50:00	37	A5	0.146183333	CZB151	DM25-growth
1330	29:00:00	37	A5	0.154266667	CZB151	DM25-growth
1331	29:10:00	37	A5	0.156633333	CZB151	DM25-growth
1332	29:20:00	37	A5	0.14675	CZB151	DM25-growth
1333	29:30:00	37	A5	0.147016667	CZB151	DM25-growth
1334	29:40:00	37	A5	0.1472	CZB151	DM25-growth
1335	29:50:00	37	A5	0.147283333	CZB151	DM25-growth
1336	30:00:00	37	A5	0.148766667	CZB151	DM25-growth
1337	30:10:00	37	A5	0.145766667	CZB151	DM25-growth
1338	30:20:00	37	A5	0.147016667	CZB151	DM25-growth
1339	30:30:00	37	A5	0.171633333	CZB151	DM25-growth
1340	30:40:00	37	A5	0.14575	CZB151	DM25-growth
1341	30:50:00	37	A5	0.144366667	CZB151	DM25-growth
1342	31:00:00	37	A5	0.152016667	CZB151	DM25-growth
1343	31:10:00	37	A5	0.145033333	CZB151	DM25-growth
1344	31:20:00	37	A5	0.143483333	CZB151	DM25-growth
1345	31:30:00	37	A5	0.143566667	CZB151	DM25-growth
1346	31:40:00	37	A5	0.143266667	CZB151	DM25-growth
1347	31:50:00	37	A5	0.1432	CZB151	DM25-growth
1348	32:00:00	37	A5	0.140983333	CZB151	DM25-growth
1349	32:10:00	37	A5	0.142383333	CZB151	DM25-growth
1350	32:20:00	37	A5	0.142733333	CZB151	DM25-growth
1351	32:30:00	37	A5	0.14255	CZB151	DM25-growth
1352	32:40:00	37	A5	0.146516667	CZB151	DM25-growth
1353	32:50:00	37	A5	0.139233333	CZB151	DM25-growth
1354	33:00:00	37	A5	0.14275	CZB151	DM25-growth
1355	33:10:00	37	A5	0.141883333	CZB151	DM25-growth
1356	33:20:00	37	A5	0.144366667	CZB151	DM25-growth
1357	33:30:00	37	A5	0.1425	CZB151	DM25-growth
1358	33:40:00	37	A5	0.14145	CZB151	DM25-growth
1359	33:50:00	37	A5	0.14505	CZB151	DM25-growth
1360	34:00:00	37	A5	0.151083333	CZB151	DM25-growth
1361	34:10:00	37	A5	0.140433333	CZB151	DM25-growth
1362	34:20:00	37	A5	0.144583333	CZB151	DM25-growth
1363	34:30:00	37	A5	0.144983333	CZB151	DM25-growth
1364	34:40:00	37	A5	0.143266667	CZB151	DM25-growth
1365	34:50:00	37	A5	0.145983333	CZB151	DM25-growth
1366	35:00:00	37	A5	0.144366667	CZB151	DM25-growth
1367	35:10:00	37	A5	0.145216667	CZB151	DM25-growth
1368	35:20:00	37	A5	0.143483333	CZB151	DM25-growth
1369	35:30:00	37	A5	0.142783333	CZB151	DM25-growth
1370	35:40:00	37	A5	0.145283333	CZB151	DM25-growth
1371	35:50:00	37	A5	0.143033333	CZB151	DM25-growth
1372	36:00:00	37	A5	0.146933333	CZB151	DM25-growth
1373	36:10:00	37	A5	0.143766667	CZB151	DM25-growth
1374	36:20:00	37	A5	0.145	CZB151	DM25-growth
1375	36:30:00	37	A5	0.14435	CZB151	DM25-growth
1376	36:40:00	37	A5	0.14445	CZB151	DM25-growth
1377	36:50:00	37	A5	0.15345	CZB151	DM25-growth
1378	37:00:00	37	A5	0.143333333	CZB151	DM25-growth
1379	37:10:00	37	A5	0.144016667	CZB151	DM25-growth
1380	37:20:00	37	A5	0.14425	CZB151	DM25-growth
1381	37:30:00	37	A5	0.143166667	CZB151	DM25-growth
1382	37:40:00	37	A5	0.1455	CZB151	DM25-growth
1383	37:50:00	37	A5	0.140816667	CZB151	DM25-growth
1384	38:00:00	37	A5	0.14535	CZB151	DM25-growth
1385	38:10:00	37	A5	0.143466667	CZB151	DM25-growth
1386	38:20:00	37	A5	0.138733333	CZB151	DM25-growth
1387	38:30:00	37	A5	0.138633333	CZB151	DM25-growth
1388	38:40:00	37	A5	0.1404	CZB151	DM25-growth
1389	38:50:00	37	A5	0.138316667	CZB151	DM25-growth
1390	39:00:00	37	A5	0.137433333	CZB151	DM25-growth
1391	39:10:00	37	A5	0.155833333	CZB151	DM25-growth
1392	39:20:00	37	A5	0.138083333	CZB151	DM25-growth
1393	39:30:00	37	A5	0.1388	CZB151	DM25-growth
1394	39:40:00	37	A5	0.143466667	CZB151	DM25-growth
1395	39:50:00	37	A5	0.138933333	CZB151	DM25-growth
1396	40:00:00	37	A5	0.1388	CZB151	DM25-growth
1397	40:10:00	37	A5	0.137633333	CZB151	DM25-growth
1398	40:20:00	37	A5	0.1368	CZB151	DM25-growth
1399	40:30:00	37	A5	0.137666667	CZB151	DM25-growth
1400	40:40:00	37	A5	0.136433333	CZB151	DM25-growth
1401	40:50:00	37	A5	0.13725	CZB151	DM25-growth
1402	41:00:00	37	A5	0.137583333	CZB151	DM25-growth
1403	41:10:00	37	A5	0.137216667	CZB151	DM25-growth
1404	41:20:00	37	A5	0.13725	CZB151	DM25-growth
1405	41:30:00	37	A5	0.13845	CZB151	DM25-growth
1406	41:40:00	37	A5	0.138	CZB151	DM25-growth
1407	41:50:00	37	A5	0.138066667	CZB151	DM25-growth
1408	42:00:00	37	A5	0.13835	CZB151	DM25-growth
1409	42:10:00	37	A5	0.13755	CZB151	DM25-growth
1410	42:20:00	37	A5	0.13595	CZB151	DM25-growth
1411	42:30:00	37	A5	0.13375	CZB151	DM25-growth
1412	42:40:00	37	A5	0.136083333	CZB151	DM25-growth
1413	42:50:00	37	A5	0.1396	CZB151	DM25-growth
1414	43:00:00	37	A5	0.133983333	CZB151	DM25-growth
1415	43:10:00	37	A5	0.13635	CZB151	DM25-growth
1416	43:20:00	37	A5	0.1359	CZB151	DM25-growth
1417	43:30:00	37	A5	0.1389	CZB151	DM25-growth
1418	43:40:00	37	A5	0.137966667	CZB151	DM25-growth
1419	43:50:00	37	A5	0.139033333	CZB151	DM25-growth
1420	44:00:00	37	A5	0.142283333	CZB151	DM25-growth
1421	44:10:00	37	A5	0.1355	CZB151	DM25-growth
1422	44:20:00	37	A5	0.1378	CZB151	DM25-growth
1423	44:30:00	37	A5	0.138933333	CZB151	DM25-growth
1424	44:40:00	37	A5	0.137316667	CZB151	DM25-growth
1425	44:50:00	37	A5	0.135316667	CZB151	DM25-growth
1426	45:00:00	37	A5	0.134716667	CZB151	DM25-growth
1427	45:10:00	37	A5	0.134333333	CZB151	DM25-growth
1428	45:20:00	37	A5	0.138683333	CZB151	DM25-growth
1429	45:30:00	37	A5	0.13225	CZB151	DM25-growth
1430	45:40:00	37	A5	0.135816667	CZB151	DM25-growth
1431	45:50:00	37	A5	0.136183333	CZB151	DM25-growth
1432	46:00:00	37	A5	0.133033333	CZB151	DM25-growth
1433	46:10:00	37	A5	0.134366667	CZB151	DM25-growth
1434	46:20:00	37	A5	0.1348	CZB151	DM25-growth
1435	46:30:00	37	A5	0.13445	CZB151	DM25-growth
1436	46:40:00	37	A5	0.132316667	CZB151	DM25-growth
1437	46:50:00	37	A5	0.1318	CZB151	DM25-growth
1438	47:00:00	37	A5	0.135816667	CZB151	DM25-growth
1439	47:10:00	37	A5	0.131083333	CZB151	DM25-growth
1440	47:20:00	37	A5	0.133883333	CZB151	DM25-growth
1441	47:30:00	37	A5	0.132566667	CZB151	DM25-growth
1442	47:40:00	37	A5	0.134233333	CZB151	DM25-growth
1443	47:50:00	37	A5	0.134333333	CZB151	DM25-growth
1444	48:00:00	37	A5	0.134283333	CZB151	DM25-growth
1445	0:00:00	37	A6	0.003616667	CZB151	DM25-growth
1446	0:10:00	37	A6	0.003933333	CZB151	DM25-growth
1447	0:20:00	37	A6	0.00425	CZB151	DM25-growth
1448	0:30:00	37	A6	0.0048	CZB151	DM25-growth
1449	0:40:00	37	A6	0.0053	CZB151	DM25-growth
1450	0:50:00	37	A6	0.00595	CZB151	DM25-growth
1451	1:00:00	37	A6	0.019083333	CZB151	DM25-growth
1452	1:10:00	37	A6	0.011716667	CZB151	DM25-growth
1453	1:20:00	37	A6	0.0083	CZB151	DM25-growth
1454	1:30:00	37	A6	0.009583333	CZB151	DM25-growth
1455	1:40:00	37	A6	0.0108	CZB151	DM25-growth
1456	1:50:00	37	A6	0.02045	CZB151	DM25-growth
1457	2:00:00	37	A6	0.014933333	CZB151	DM25-growth
1458	2:10:00	37	A6	0.025933333	CZB151	DM25-growth
1459	2:20:00	37	A6	0.0187	CZB151	DM25-growth
1460	2:30:00	37	A6	0.020433333	CZB151	DM25-growth
1461	2:40:00	37	A6	0.031916667	CZB151	DM25-growth
1462	2:50:00	37	A6	0.022	CZB151	DM25-growth
1463	3:00:00	37	A6	0.02325	CZB151	DM25-growth
1464	3:10:00	37	A6	0.0253	CZB151	DM25-growth
1465	3:20:00	37	A6	0.02745	CZB151	DM25-growth
1466	3:30:00	37	A6	0.034983333	CZB151	DM25-growth
1467	3:40:00	37	A6	0.03455	CZB151	DM25-growth
1468	3:50:00	37	A6	0.03885	CZB151	DM25-growth
1469	4:00:00	37	A6	0.0447	CZB151	DM25-growth
1470	4:10:00	37	A6	0.048433333	CZB151	DM25-growth
1471	4:20:00	37	A6	0.0555	CZB151	DM25-growth
1472	4:30:00	37	A6	0.062683333	CZB151	DM25-growth
1473	4:40:00	37	A6	0.066633333	CZB151	DM25-growth
1474	4:50:00	37	A6	0.101166667	CZB151	DM25-growth
1475	5:00:00	37	A6	0.0706	CZB151	DM25-growth
1476	5:10:00	37	A6	0.0716	CZB151	DM25-growth
1477	5:20:00	37	A6	0.0744	CZB151	DM25-growth
1478	5:30:00	37	A6	0.087966667	CZB151	DM25-growth
1479	5:40:00	37	A6	0.11155	CZB151	DM25-growth
1480	5:50:00	37	A6	0.104766667	CZB151	DM25-growth
1481	6:00:00	37	A6	0.106333333	CZB151	DM25-growth
1482	6:10:00	37	A6	0.086116667	CZB151	DM25-growth
1483	6:20:00	37	A6	0.116266667	CZB151	DM25-growth
1484	6:30:00	37	A6	0.14135	CZB151	DM25-growth
1485	6:40:00	37	A6	0.0972	CZB151	DM25-growth
1486	6:50:00	37	A6	0.132233333	CZB151	DM25-growth
1487	7:00:00	37	A6	0.109383333	CZB151	DM25-growth
1488	7:10:00	37	A6	0.104933333	CZB151	DM25-growth
1489	7:20:00	37	A6	0.111833333	CZB151	DM25-growth
1490	7:30:00	37	A6	0.114766667	CZB151	DM25-growth
1491	7:40:00	37	A6	0.114583333	CZB151	DM25-growth
1492	7:50:00	37	A6	0.113833333	CZB151	DM25-growth
1493	8:00:00	37	A6	0.121466667	CZB151	DM25-growth
1494	8:10:00	37	A6	0.13645	CZB151	DM25-growth
1495	8:20:00	37	A6	0.128783333	CZB151	DM25-growth
1496	8:30:00	37	A6	0.13015	CZB151	DM25-growth
1497	8:40:00	37	A6	0.153866667	CZB151	DM25-growth
1498	8:50:00	37	A6	0.133716667	CZB151	DM25-growth
1499	9:00:00	37	A6	0.160666667	CZB151	DM25-growth
1500	9:10:00	37	A6	0.148933333	CZB151	DM25-growth
1501	9:20:00	37	A6	0.147266667	CZB151	DM25-growth
1502	9:30:00	37	A6	0.161616667	CZB151	DM25-growth
1503	9:40:00	37	A6	0.173416667	CZB151	DM25-growth
1504	9:50:00	37	A6	0.1787	CZB151	DM25-growth
1505	10:00:00	37	A6	0.18295	CZB151	DM25-growth
1506	10:10:00	37	A6	0.181066667	CZB151	DM25-growth
1507	10:20:00	37	A6	0.19125	CZB151	DM25-growth
1508	10:30:00	37	A6	0.218733333	CZB151	DM25-growth
1509	10:40:00	37	A6	0.179033333	CZB151	DM25-growth
1510	10:50:00	37	A6	0.173966667	CZB151	DM25-growth
1511	11:00:00	37	A6	0.177666667	CZB151	DM25-growth
1512	11:10:00	37	A6	0.1718	CZB151	DM25-growth
1513	11:20:00	37	A6	0.1727	CZB151	DM25-growth
1514	11:30:00	37	A6	0.184466667	CZB151	DM25-growth
1515	11:40:00	37	A6	0.1693	CZB151	DM25-growth
1516	11:50:00	37	A6	0.171916667	CZB151	DM25-growth
1517	12:00:00	37	A6	0.176566667	CZB151	DM25-growth
1518	12:10:00	37	A6	0.172	CZB151	DM25-growth
1519	12:20:00	37	A6	0.17485	CZB151	DM25-growth
1520	12:30:00	37	A6	0.174166667	CZB151	DM25-growth
1521	12:40:00	37	A6	0.171566667	CZB151	DM25-growth
1522	12:50:00	37	A6	0.1641	CZB151	DM25-growth
1523	13:00:00	37	A6	0.164916667	CZB151	DM25-growth
1524	13:10:00	37	A6	0.163383333	CZB151	DM25-growth
1525	13:20:00	37	A6	0.162466667	CZB151	DM25-growth
1526	13:30:00	37	A6	0.162316667	CZB151	DM25-growth
1527	13:40:00	37	A6	0.163466667	CZB151	DM25-growth
1528	13:50:00	37	A6	0.162816667	CZB151	DM25-growth
1529	14:00:00	37	A6	0.161333333	CZB151	DM25-growth
1530	14:10:00	37	A6	0.16575	CZB151	DM25-growth
1531	14:20:00	37	A6	0.1589	CZB151	DM25-growth
1532	14:30:00	37	A6	0.16175	CZB151	DM25-growth
1533	14:40:00	37	A6	0.159316667	CZB151	DM25-growth
1534	14:50:00	37	A6	0.161	CZB151	DM25-growth
1535	15:00:00	37	A6	0.171183333	CZB151	DM25-growth
1536	15:10:00	37	A6	0.158233333	CZB151	DM25-growth
1537	15:20:00	37	A6	0.165833333	CZB151	DM25-growth
1538	15:30:00	37	A6	0.160583333	CZB151	DM25-growth
1539	15:40:00	37	A6	0.158666667	CZB151	DM25-growth
1540	15:50:00	37	A6	0.167383333	CZB151	DM25-growth
1541	16:00:00	37	A6	0.157566667	CZB151	DM25-growth
1542	16:10:00	37	A6	0.157283333	CZB151	DM25-growth
1543	16:20:00	37	A6	0.16035	CZB151	DM25-growth
1544	16:30:00	37	A6	0.15515	CZB151	DM25-growth
1545	16:40:00	37	A6	0.153966667	CZB151	DM25-growth
1546	16:50:00	37	A6	0.154116667	CZB151	DM25-growth
1547	17:00:00	37	A6	0.15335	CZB151	DM25-growth
1548	17:10:00	37	A6	0.153983333	CZB151	DM25-growth
1549	17:20:00	37	A6	0.155433333	CZB151	DM25-growth
1550	17:30:00	37	A6	0.158283333	CZB151	DM25-growth
1551	17:40:00	37	A6	0.1529	CZB151	DM25-growth
1552	17:50:00	37	A6	0.154683333	CZB151	DM25-growth
1553	18:00:00	37	A6	0.163933333	CZB151	DM25-growth
1554	18:10:00	37	A6	0.152966667	CZB151	DM25-growth
1555	18:20:00	37	A6	0.165533333	CZB151	DM25-growth
1556	18:30:00	37	A6	0.153966667	CZB151	DM25-growth
1557	18:40:00	37	A6	0.156816667	CZB151	DM25-growth
1558	18:50:00	37	A6	0.171283333	CZB151	DM25-growth
1559	19:00:00	37	A6	0.154833333	CZB151	DM25-growth
1560	19:10:00	37	A6	0.152583333	CZB151	DM25-growth
1561	19:20:00	37	A6	0.15475	CZB151	DM25-growth
1562	19:30:00	37	A6	0.1562	CZB151	DM25-growth
1563	19:40:00	37	A6	0.154116667	CZB151	DM25-growth
1564	19:50:00	37	A6	0.156666667	CZB151	DM25-growth
1565	20:00:00	37	A6	0.157633333	CZB151	DM25-growth
1566	20:10:00	37	A6	0.158516667	CZB151	DM25-growth
1567	20:20:00	37	A6	0.161816667	CZB151	DM25-growth
1568	20:30:00	37	A6	0.161283333	CZB151	DM25-growth
1569	20:40:00	37	A6	0.158733333	CZB151	DM25-growth
1570	20:50:00	37	A6	0.156466667	CZB151	DM25-growth
1571	21:00:00	37	A6	0.1568	CZB151	DM25-growth
1572	21:10:00	37	A6	0.158733333	CZB151	DM25-growth
1573	21:20:00	37	A6	0.156633333	CZB151	DM25-growth
1574	21:30:00	37	A6	0.1579	CZB151	DM25-growth
1575	21:40:00	37	A6	0.1613	CZB151	DM25-growth
1576	21:50:00	37	A6	0.163166667	CZB151	DM25-growth
1577	22:00:00	37	A6	0.159166667	CZB151	DM25-growth
1578	22:10:00	37	A6	0.159566667	CZB151	DM25-growth
1579	22:20:00	37	A6	0.158833333	CZB151	DM25-growth
1580	22:30:00	37	A6	0.1596	CZB151	DM25-growth
1581	22:40:00	37	A6	0.15945	CZB151	DM25-growth
1582	22:50:00	37	A6	0.159966667	CZB151	DM25-growth
1583	23:00:00	37	A6	0.15575	CZB151	DM25-growth
1584	23:10:00	37	A6	0.15635	CZB151	DM25-growth
1585	23:20:00	37	A6	0.162016667	CZB151	DM25-growth
1586	23:30:00	37	A6	0.157666667	CZB151	DM25-growth
1587	23:40:00	37	A6	0.16555	CZB151	DM25-growth
1588	23:50:00	37	A6	0.15485	CZB151	DM25-growth
1589	24:00:00	37	A6	0.155066667	CZB151	DM25-growth
1590	24:10:00	37	A6	0.153966667	CZB151	DM25-growth
1591	24:20:00	37	A6	0.1543	CZB151	DM25-growth
1592	24:30:00	37	A6	0.159316667	CZB151	DM25-growth
1593	24:40:00	37	A6	0.161866667	CZB151	DM25-growth
1594	24:50:00	37	A6	0.155483333	CZB151	DM25-growth
1595	25:00:00	37	A6	0.14905	CZB151	DM25-growth
1596	25:10:00	37	A6	0.152283333	CZB151	DM25-growth
1597	25:20:00	37	A6	0.149583333	CZB151	DM25-growth
1598	25:30:00	37	A6	0.151066667	CZB151	DM25-growth
1599	25:40:00	37	A6	0.154333333	CZB151	DM25-growth
1600	25:50:00	37	A6	0.154633333	CZB151	DM25-growth
1601	26:00:00	37	A6	0.1547	CZB151	DM25-growth
1602	26:10:00	37	A6	0.156216667	CZB151	DM25-growth
1603	26:20:00	37	A6	0.150566667	CZB151	DM25-growth
1604	26:30:00	37	A6	0.151633333	CZB151	DM25-growth
1605	26:40:00	37	A6	0.150366667	CZB151	DM25-growth
1606	26:50:00	37	A6	0.158883333	CZB151	DM25-growth
1607	27:00:00	37	A6	0.158166667	CZB151	DM25-growth
1608	27:10:00	37	A6	0.1478	CZB151	DM25-growth
1609	27:20:00	37	A6	0.150366667	CZB151	DM25-growth
1610	27:30:00	37	A6	0.1533	CZB151	DM25-growth
1611	27:40:00	37	A6	0.152516667	CZB151	DM25-growth
1612	27:50:00	37	A6	0.151916667	CZB151	DM25-growth
1613	28:00:00	37	A6	0.15255	CZB151	DM25-growth
1614	28:10:00	37	A6	0.149516667	CZB151	DM25-growth
1615	28:20:00	37	A6	0.15235	CZB151	DM25-growth
1616	28:30:00	37	A6	0.15095	CZB151	DM25-growth
1617	28:40:00	37	A6	0.15195	CZB151	DM25-growth
1618	28:50:00	37	A6	0.148783333	CZB151	DM25-growth
1619	29:00:00	37	A6	0.149166667	CZB151	DM25-growth
1620	29:10:00	37	A6	0.146933333	CZB151	DM25-growth
1621	29:20:00	37	A6	0.14705	CZB151	DM25-growth
1622	29:30:00	37	A6	0.146216667	CZB151	DM25-growth
1623	29:40:00	37	A6	0.147	CZB151	DM25-growth
1624	29:50:00	37	A6	0.154083333	CZB151	DM25-growth
1625	30:00:00	37	A6	0.147766667	CZB151	DM25-growth
1626	30:10:00	37	A6	0.153066667	CZB151	DM25-growth
1627	30:20:00	37	A6	0.152316667	CZB151	DM25-growth
1628	30:30:00	37	A6	0.161433333	CZB151	DM25-growth
1629	30:40:00	37	A6	0.14995	CZB151	DM25-growth
1630	30:50:00	37	A6	0.158366667	CZB151	DM25-growth
1631	31:00:00	37	A6	0.151716667	CZB151	DM25-growth
1632	31:10:00	37	A6	0.149033333	CZB151	DM25-growth
1633	31:20:00	37	A6	0.154283333	CZB151	DM25-growth
1634	31:30:00	37	A6	0.153566667	CZB151	DM25-growth
1635	31:40:00	37	A6	0.160766667	CZB151	DM25-growth
1636	31:50:00	37	A6	0.1573	CZB151	DM25-growth
1637	32:00:00	37	A6	0.150983333	CZB151	DM25-growth
1638	32:10:00	37	A6	0.154483333	CZB151	DM25-growth
1639	32:20:00	37	A6	0.145633333	CZB151	DM25-growth
1640	32:30:00	37	A6	0.15165	CZB151	DM25-growth
1641	32:40:00	37	A6	0.148816667	CZB151	DM25-growth
1642	32:50:00	37	A6	0.152133333	CZB151	DM25-growth
1643	33:00:00	37	A6	0.14545	CZB151	DM25-growth
1644	33:10:00	37	A6	0.154683333	CZB151	DM25-growth
1645	33:20:00	37	A6	0.153966667	CZB151	DM25-growth
1646	33:30:00	37	A6	0.1625	CZB151	DM25-growth
1647	33:40:00	37	A6	0.14655	CZB151	DM25-growth
1648	33:50:00	37	A6	0.14595	CZB151	DM25-growth
1649	34:00:00	37	A6	0.149483333	CZB151	DM25-growth
1650	34:10:00	37	A6	0.171333333	CZB151	DM25-growth
1651	34:20:00	37	A6	0.144783333	CZB151	DM25-growth
1652	34:30:00	37	A6	0.151683333	CZB151	DM25-growth
1653	34:40:00	37	A6	0.144766667	CZB151	DM25-growth
1654	34:50:00	37	A6	0.159083333	CZB151	DM25-growth
1655	35:00:00	37	A6	0.144266667	CZB151	DM25-growth
1656	35:10:00	37	A6	0.142116667	CZB151	DM25-growth
1657	35:20:00	37	A6	0.157583333	CZB151	DM25-growth
1658	35:30:00	37	A6	0.157983333	CZB151	DM25-growth
1659	35:40:00	37	A6	0.147283333	CZB151	DM25-growth
1660	35:50:00	37	A6	0.142433333	CZB151	DM25-growth
1661	36:00:00	37	A6	0.156533333	CZB151	DM25-growth
1662	36:10:00	37	A6	0.143866667	CZB151	DM25-growth
1663	36:20:00	37	A6	0.1426	CZB151	DM25-growth
1664	36:30:00	37	A6	0.14195	CZB151	DM25-growth
1665	36:40:00	37	A6	0.14355	CZB151	DM25-growth
1666	36:50:00	37	A6	0.14615	CZB151	DM25-growth
1667	37:00:00	37	A6	0.154433333	CZB151	DM25-growth
1668	37:10:00	37	A6	0.155816667	CZB151	DM25-growth
1669	37:20:00	37	A6	0.14605	CZB151	DM25-growth
1670	37:30:00	37	A6	0.147866667	CZB151	DM25-growth
1671	37:40:00	37	A6	0.1415	CZB151	DM25-growth
1672	37:50:00	37	A6	0.154416667	CZB151	DM25-growth
1673	38:00:00	37	A6	0.14695	CZB151	DM25-growth
1674	38:10:00	37	A6	0.139566667	CZB151	DM25-growth
1675	38:20:00	37	A6	0.150433333	CZB151	DM25-growth
1676	38:30:00	37	A6	0.148733333	CZB151	DM25-growth
1677	38:40:00	37	A6	0.1411	CZB151	DM25-growth
1678	38:50:00	37	A6	0.141616667	CZB151	DM25-growth
1679	39:00:00	37	A6	0.142733333	CZB151	DM25-growth
1680	39:10:00	37	A6	0.143133333	CZB151	DM25-growth
1681	39:20:00	37	A6	0.146583333	CZB151	DM25-growth
1682	39:30:00	37	A6	0.1457	CZB151	DM25-growth
1683	39:40:00	37	A6	0.156866667	CZB151	DM25-growth
1684	39:50:00	37	A6	0.150133333	CZB151	DM25-growth
1685	40:00:00	37	A6	0.1432	CZB151	DM25-growth
1686	40:10:00	37	A6	0.149633333	CZB151	DM25-growth
1687	40:20:00	37	A6	0.1396	CZB151	DM25-growth
1688	40:30:00	37	A6	0.148866667	CZB151	DM25-growth
1689	40:40:00	37	A6	0.139533333	CZB151	DM25-growth
1690	40:50:00	37	A6	0.14565	CZB151	DM25-growth
1691	41:00:00	37	A6	0.140883333	CZB151	DM25-growth
1692	41:10:00	37	A6	0.140316667	CZB151	DM25-growth
1693	41:20:00	37	A6	0.14595	CZB151	DM25-growth
1694	41:30:00	37	A6	0.14295	CZB151	DM25-growth
1695	41:40:00	37	A6	0.142	CZB151	DM25-growth
1696	41:50:00	37	A6	0.141866667	CZB151	DM25-growth
1697	42:00:00	37	A6	0.14245	CZB151	DM25-growth
1698	42:10:00	37	A6	0.14095	CZB151	DM25-growth
1699	42:20:00	37	A6	0.14505	CZB151	DM25-growth
1700	42:30:00	37	A6	0.13965	CZB151	DM25-growth
1701	42:40:00	37	A6	0.139283333	CZB151	DM25-growth
1702	42:50:00	37	A6	0.1524	CZB151	DM25-growth
1703	43:00:00	37	A6	0.138283333	CZB151	DM25-growth
1704	43:10:00	37	A6	0.14835	CZB151	DM25-growth
1705	43:20:00	37	A6	0.1463	CZB151	DM25-growth
1706	43:30:00	37	A6	0.1523	CZB151	DM25-growth
1707	43:40:00	37	A6	0.156266667	CZB151	DM25-growth
1708	43:50:00	37	A6	0.142033333	CZB151	DM25-growth
1709	44:00:00	37	A6	0.150283333	CZB151	DM25-growth
1710	44:10:00	37	A6	0.1459	CZB151	DM25-growth
1711	44:20:00	37	A6	0.1436	CZB151	DM25-growth
1712	44:30:00	37	A6	0.142833333	CZB151	DM25-growth
1713	44:40:00	37	A6	0.143416667	CZB151	DM25-growth
1714	44:50:00	37	A6	0.144716667	CZB151	DM25-growth
1715	45:00:00	37	A6	0.144816667	CZB151	DM25-growth
1716	45:10:00	37	A6	0.143433333	CZB151	DM25-growth
1717	45:20:00	37	A6	0.143683333	CZB151	DM25-growth
1718	45:30:00	37	A6	0.14365	CZB151	DM25-growth
1719	45:40:00	37	A6	0.147716667	CZB151	DM25-growth
1720	45:50:00	37	A6	0.143383333	CZB151	DM25-growth
1721	46:00:00	37	A6	0.148733333	CZB151	DM25-growth
1722	46:10:00	37	A6	0.141966667	CZB151	DM25-growth
1723	46:20:00	37	A6	0.1422	CZB151	DM25-growth
1724	46:30:00	37	A6	0.14455	CZB151	DM25-growth
1725	46:40:00	37	A6	0.141916667	CZB151	DM25-growth
1726	46:50:00	37	A6	0.1433	CZB151	DM25-growth
1727	47:00:00	37	A6	0.175816667	CZB151	DM25-growth
1728	47:10:00	37	A6	0.138383333	CZB151	DM25-growth
1729	47:20:00	37	A6	0.144083333	CZB151	DM25-growth
1730	47:30:00	37	A6	0.167366667	CZB151	DM25-growth
1731	47:40:00	37	A6	0.146133333	CZB151	DM25-growth
1732	47:50:00	37	A6	0.142933333	CZB151	DM25-growth
1733	48:00:00	37	A6	0.147283333	CZB151	DM25-growth
1734	0:00:00	37	A7	0.003516667	CZB151	DM25-growth
1735	0:10:00	37	A7	0.003633333	CZB151	DM25-growth
1736	0:20:00	37	A7	0.00435	CZB151	DM25-growth
1737	0:30:00	37	A7	0.0047	CZB151	DM25-growth
1738	0:40:00	37	A7	0.005	CZB151	DM25-growth
1739	0:50:00	37	A7	0.00565	CZB151	DM25-growth
1740	1:00:00	37	A7	0.006483333	CZB151	DM25-growth
1741	1:10:00	37	A7	0.007316667	CZB151	DM25-growth
1742	1:20:00	37	A7	0.0081	CZB151	DM25-growth
1743	1:30:00	37	A7	0.009283333	CZB151	DM25-growth
1744	1:40:00	37	A7	0.0107	CZB151	DM25-growth
1745	1:50:00	37	A7	0.01215	CZB151	DM25-growth
1746	2:00:00	37	A7	0.013833333	CZB151	DM25-growth
1747	2:10:00	37	A7	0.016333333	CZB151	DM25-growth
1748	2:20:00	37	A7	0.0187	CZB151	DM25-growth
1749	2:30:00	37	A7	0.020533333	CZB151	DM25-growth
1750	2:40:00	37	A7	0.021116667	CZB151	DM25-growth
1751	2:50:00	37	A7	0.0222	CZB151	DM25-growth
1752	3:00:00	37	A7	0.02275	CZB151	DM25-growth
1753	3:10:00	37	A7	0.0256	CZB151	DM25-growth
1754	3:20:00	37	A7	0.02805	CZB151	DM25-growth
1755	3:30:00	37	A7	0.031183333	CZB151	DM25-growth
1756	3:40:00	37	A7	0.03525	CZB151	DM25-growth
1757	3:50:00	37	A7	0.03935	CZB151	DM25-growth
1758	4:00:00	37	A7	0.0461	CZB151	DM25-growth
1759	4:10:00	37	A7	0.052133333	CZB151	DM25-growth
1760	4:20:00	37	A7	0.0597	CZB151	DM25-growth
1761	4:30:00	37	A7	0.068683333	CZB151	DM25-growth
1762	4:40:00	37	A7	0.079433333	CZB151	DM25-growth
1763	4:50:00	37	A7	0.091166667	CZB151	DM25-growth
1764	5:00:00	37	A7	0.1004	CZB151	DM25-growth
1765	5:10:00	37	A7	0.112	CZB151	DM25-growth
1766	5:20:00	37	A7	0.1162	CZB151	DM25-growth
1767	5:30:00	37	A7	0.125366667	CZB151	DM25-growth
1768	5:40:00	37	A7	0.12765	CZB151	DM25-growth
1769	5:50:00	37	A7	0.143966667	CZB151	DM25-growth
1770	6:00:00	37	A7	0.139933333	CZB151	DM25-growth
1771	6:10:00	37	A7	0.134816667	CZB151	DM25-growth
1772	6:20:00	37	A7	0.135366667	CZB151	DM25-growth
1773	6:30:00	37	A7	0.24565	CZB151	DM25-growth
1774	6:40:00	37	A7	0.2077	CZB151	DM25-growth
1775	6:50:00	37	A7	0.266733333	CZB151	DM25-growth
1776	7:00:00	37	A7	0.170283333	CZB151	DM25-growth
1777	7:10:00	37	A7	0.168333333	CZB151	DM25-growth
1778	7:20:00	37	A7	0.183733333	CZB151	DM25-growth
1779	7:30:00	37	A7	0.225666667	CZB151	DM25-growth
1780	7:40:00	37	A7	0.210383333	CZB151	DM25-growth
1781	7:50:00	37	A7	0.265333333	CZB151	DM25-growth
1782	8:00:00	37	A7	0.224866667	CZB151	DM25-growth
1783	8:10:00	37	A7	0.23695	CZB151	DM25-growth
1784	8:20:00	37	A7	0.234383333	CZB151	DM25-growth
1785	8:30:00	37	A7	0.23535	CZB151	DM25-growth
1786	8:40:00	37	A7	0.232766667	CZB151	DM25-growth
1787	8:50:00	37	A7	0.227916667	CZB151	DM25-growth
1788	9:00:00	37	A7	0.238466667	CZB151	DM25-growth
1789	9:10:00	37	A7	0.262633333	CZB151	DM25-growth
1790	9:20:00	37	A7	0.251966667	CZB151	DM25-growth
1791	9:30:00	37	A7	0.322716667	CZB151	DM25-growth
1792	9:40:00	37	A7	0.278816667	CZB151	DM25-growth
1793	9:50:00	37	A7	0.2547	CZB151	DM25-growth
1794	10:00:00	37	A7	0.26255	CZB151	DM25-growth
1795	10:10:00	37	A7	0.254566667	CZB151	DM25-growth
1796	10:20:00	37	A7	0.26635	CZB151	DM25-growth
1797	10:30:00	37	A7	0.289833333	CZB151	DM25-growth
1798	10:40:00	37	A7	0.335033333	CZB151	DM25-growth
1799	10:50:00	37	A7	0.371366667	CZB151	DM25-growth
1800	11:00:00	37	A7	0.417666667	CZB151	DM25-growth
1801	11:10:00	37	A7	0.4302	CZB151	DM25-growth
1802	11:20:00	37	A7	0.4112	CZB151	DM25-growth
1803	11:30:00	37	A7	0.370866667	CZB151	DM25-growth
1804	11:40:00	37	A7	0.4122	CZB151	DM25-growth
1805	11:50:00	37	A7	0.400316667	CZB151	DM25-growth
1806	12:00:00	37	A7	0.393466667	CZB151	DM25-growth
1807	12:10:00	37	A7	0.3696	CZB151	DM25-growth
1808	12:20:00	37	A7	0.42755	CZB151	DM25-growth
1809	12:30:00	37	A7	0.397466667	CZB151	DM25-growth
1810	12:40:00	37	A7	0.374966667	CZB151	DM25-growth
1811	12:50:00	37	A7	0.403	CZB151	DM25-growth
1812	13:00:00	37	A7	0.375816667	CZB151	DM25-growth
1813	13:10:00	37	A7	0.392583333	CZB151	DM25-growth
1814	13:20:00	37	A7	0.394166667	CZB151	DM25-growth
1815	13:30:00	37	A7	0.376016667	CZB151	DM25-growth
1816	13:40:00	37	A7	0.292466667	CZB151	DM25-growth
1817	13:50:00	37	A7	0.304016667	CZB151	DM25-growth
1818	14:00:00	37	A7	0.265033333	CZB151	DM25-growth
1819	14:10:00	37	A7	0.22725	CZB151	DM25-growth
1820	14:20:00	37	A7	0.2211	CZB151	DM25-growth
1821	14:30:00	37	A7	0.18925	CZB151	DM25-growth
1822	14:40:00	37	A7	0.192816667	CZB151	DM25-growth
1823	14:50:00	37	A7	0.1717	CZB151	DM25-growth
1824	15:00:00	37	A7	0.148583333	CZB151	DM25-growth
1825	15:10:00	37	A7	0.140933333	CZB151	DM25-growth
1826	15:20:00	37	A7	0.128933333	CZB151	DM25-growth
1827	15:30:00	37	A7	0.124883333	CZB151	DM25-growth
1828	15:40:00	37	A7	0.121366667	CZB151	DM25-growth
1829	15:50:00	37	A7	0.124083333	CZB151	DM25-growth
1830	16:00:00	37	A7	0.117666667	CZB151	DM25-growth
1831	16:10:00	37	A7	0.116983333	CZB151	DM25-growth
1832	16:20:00	37	A7	0.11715	CZB151	DM25-growth
1833	16:30:00	37	A7	0.13515	CZB151	DM25-growth
1834	16:40:00	37	A7	0.129966667	CZB151	DM25-growth
1835	16:50:00	37	A7	0.121916667	CZB151	DM25-growth
1836	17:00:00	37	A7	0.16085	CZB151	DM25-growth
1837	17:10:00	37	A7	0.166183333	CZB151	DM25-growth
1838	17:20:00	37	A7	0.152433333	CZB151	DM25-growth
1839	17:30:00	37	A7	0.197683333	CZB151	DM25-growth
1840	17:40:00	37	A7	0.3347	CZB151	DM25-growth
1841	17:50:00	37	A7	0.306483333	CZB151	DM25-growth
1842	18:00:00	37	A7	0.274033333	CZB151	DM25-growth
1843	18:10:00	37	A7	0.281366667	CZB151	DM25-growth
1844	18:20:00	37	A7	0.266933333	CZB151	DM25-growth
1845	18:30:00	37	A7	0.258766667	CZB151	DM25-growth
1846	18:40:00	37	A7	0.256316667	CZB151	DM25-growth
1847	18:50:00	37	A7	0.267283333	CZB151	DM25-growth
1848	19:00:00	37	A7	0.310133333	CZB151	DM25-growth
1849	19:10:00	37	A7	0.427683333	CZB151	DM25-growth
1850	19:20:00	37	A7	0.31445	CZB151	DM25-growth
1851	19:30:00	37	A7	0.274	CZB151	DM25-growth
1852	19:40:00	37	A7	0.357116667	CZB151	DM25-growth
1853	19:50:00	37	A7	0.268166667	CZB151	DM25-growth
1854	20:00:00	37	A7	0.269433333	CZB151	DM25-growth
1855	20:10:00	37	A7	0.259716667	CZB151	DM25-growth
1856	20:20:00	37	A7	0.244716667	CZB151	DM25-growth
1857	20:30:00	37	A7	0.212083333	CZB151	DM25-growth
1858	20:40:00	37	A7	0.206333333	CZB151	DM25-growth
1859	20:50:00	37	A7	0.202766667	CZB151	DM25-growth
1860	21:00:00	37	A7	0.2015	CZB151	DM25-growth
1861	21:10:00	37	A7	0.195633333	CZB151	DM25-growth
1862	21:20:00	37	A7	0.203233333	CZB151	DM25-growth
1863	21:30:00	37	A7	0.205	CZB151	DM25-growth
1864	21:40:00	37	A7	0.2059	CZB151	DM25-growth
1865	21:50:00	37	A7	0.202666667	CZB151	DM25-growth
1866	22:00:00	37	A7	0.205366667	CZB151	DM25-growth
1867	22:10:00	37	A7	0.207666667	CZB151	DM25-growth
1868	22:20:00	37	A7	0.208033333	CZB151	DM25-growth
1869	22:30:00	37	A7	0.2103	CZB151	DM25-growth
1870	22:40:00	37	A7	0.22305	CZB151	DM25-growth
1871	22:50:00	37	A7	0.206766667	CZB151	DM25-growth
1872	23:00:00	37	A7	0.21535	CZB151	DM25-growth
1873	23:10:00	37	A7	0.21205	CZB151	DM25-growth
1874	23:20:00	37	A7	0.219616667	CZB151	DM25-growth
1875	23:30:00	37	A7	0.221566667	CZB151	DM25-growth
1876	23:40:00	37	A7	0.22295	CZB151	DM25-growth
1877	23:50:00	37	A7	0.23285	CZB151	DM25-growth
1878	24:00:00	37	A7	0.229266667	CZB151	DM25-growth
1879	24:10:00	37	A7	0.216266667	CZB151	DM25-growth
1880	24:20:00	37	A7	0.2145	CZB151	DM25-growth
1881	24:30:00	37	A7	0.220816667	CZB151	DM25-growth
1882	24:40:00	37	A7	0.205766667	CZB151	DM25-growth
1883	24:50:00	37	A7	0.204783333	CZB151	DM25-growth
1884	25:00:00	37	A7	0.21195	CZB151	DM25-growth
1885	25:10:00	37	A7	0.218383333	CZB151	DM25-growth
1886	25:20:00	37	A7	0.213983333	CZB151	DM25-growth
1887	25:30:00	37	A7	0.206966667	CZB151	DM25-growth
1888	25:40:00	37	A7	0.193433333	CZB151	DM25-growth
1889	25:50:00	37	A7	0.197033333	CZB151	DM25-growth
1890	26:00:00	37	A7	0.2033	CZB151	DM25-growth
1891	26:10:00	37	A7	0.226716667	CZB151	DM25-growth
1892	26:20:00	37	A7	0.207966667	CZB151	DM25-growth
1893	26:30:00	37	A7	0.223833333	CZB151	DM25-growth
1894	26:40:00	37	A7	0.229566667	CZB151	DM25-growth
1895	26:50:00	37	A7	0.216683333	CZB151	DM25-growth
1896	27:00:00	37	A7	0.233166667	CZB151	DM25-growth
1897	27:10:00	37	A7	0.22	CZB151	DM25-growth
1898	27:20:00	37	A7	0.224766667	CZB151	DM25-growth
1899	27:30:00	37	A7	0.2206	CZB151	DM25-growth
1900	27:40:00	37	A7	0.206216667	CZB151	DM25-growth
1901	27:50:00	37	A7	0.213216667	CZB151	DM25-growth
1902	28:00:00	37	A7	0.19215	CZB151	DM25-growth
1903	28:10:00	37	A7	0.187716667	CZB151	DM25-growth
1904	28:20:00	37	A7	0.19415	CZB151	DM25-growth
1905	28:30:00	37	A7	0.21045	CZB151	DM25-growth
1906	28:40:00	37	A7	0.21225	CZB151	DM25-growth
1907	28:50:00	37	A7	0.201383333	CZB151	DM25-growth
1908	29:00:00	37	A7	0.202766667	CZB151	DM25-growth
1909	29:10:00	37	A7	0.192733333	CZB151	DM25-growth
1910	29:20:00	37	A7	0.19185	CZB151	DM25-growth
1911	29:30:00	37	A7	0.193716667	CZB151	DM25-growth
1912	29:40:00	37	A7	0.1982	CZB151	DM25-growth
1913	29:50:00	37	A7	0.203683333	CZB151	DM25-growth
1914	30:00:00	37	A7	0.192566667	CZB151	DM25-growth
1915	30:10:00	37	A7	0.190666667	CZB151	DM25-growth
1916	30:20:00	37	A7	0.201516667	CZB151	DM25-growth
1917	30:30:00	37	A7	0.207033333	CZB151	DM25-growth
1918	30:40:00	37	A7	0.18375	CZB151	DM25-growth
1919	30:50:00	37	A7	0.183266667	CZB151	DM25-growth
1920	31:00:00	37	A7	0.182316667	CZB151	DM25-growth
1921	31:10:00	37	A7	0.178833333	CZB151	DM25-growth
1922	31:20:00	37	A7	0.185383333	CZB151	DM25-growth
1923	31:30:00	37	A7	0.194466667	CZB151	DM25-growth
1924	31:40:00	37	A7	0.188766667	CZB151	DM25-growth
1925	31:50:00	37	A7	0.1839	CZB151	DM25-growth
1926	32:00:00	37	A7	0.178583333	CZB151	DM25-growth
1927	32:10:00	37	A7	0.193083333	CZB151	DM25-growth
1928	32:20:00	37	A7	0.179033333	CZB151	DM25-growth
1929	32:30:00	37	A7	0.18025	CZB151	DM25-growth
1930	32:40:00	37	A7	0.173916667	CZB151	DM25-growth
1931	32:50:00	37	A7	0.165533333	CZB151	DM25-growth
1932	33:00:00	37	A7	0.18135	CZB151	DM25-growth
1933	33:10:00	37	A7	0.175483333	CZB151	DM25-growth
1934	33:20:00	37	A7	0.163966667	CZB151	DM25-growth
1935	33:30:00	37	A7	0.1562	CZB151	DM25-growth
1936	33:40:00	37	A7	0.15585	CZB151	DM25-growth
1937	33:50:00	37	A7	0.16105	CZB151	DM25-growth
1938	34:00:00	37	A7	0.182583333	CZB151	DM25-growth
1939	34:10:00	37	A7	0.204733333	CZB151	DM25-growth
1940	34:20:00	37	A7	0.177083333	CZB151	DM25-growth
1941	34:30:00	37	A7	0.183383333	CZB151	DM25-growth
1942	34:40:00	37	A7	0.185066667	CZB151	DM25-growth
1943	34:50:00	37	A7	0.172783333	CZB151	DM25-growth
1944	35:00:00	37	A7	0.168866667	CZB151	DM25-growth
1945	35:10:00	37	A7	0.168316667	CZB151	DM25-growth
1946	35:20:00	37	A7	0.162083333	CZB151	DM25-growth
1947	35:30:00	37	A7	0.161683333	CZB151	DM25-growth
1948	35:40:00	37	A7	0.157683333	CZB151	DM25-growth
1949	35:50:00	37	A7	0.151733333	CZB151	DM25-growth
1950	36:00:00	37	A7	0.164533333	CZB151	DM25-growth
1951	36:10:00	37	A7	0.161466667	CZB151	DM25-growth
1952	36:20:00	37	A7	0.1642	CZB151	DM25-growth
1953	36:30:00	37	A7	0.16655	CZB151	DM25-growth
1954	36:40:00	37	A7	0.16455	CZB151	DM25-growth
1955	36:50:00	37	A7	0.16225	CZB151	DM25-growth
1956	37:00:00	37	A7	0.168233333	CZB151	DM25-growth
1957	37:10:00	37	A7	0.157916667	CZB151	DM25-growth
1958	37:20:00	37	A7	0.16105	CZB151	DM25-growth
1959	37:30:00	37	A7	0.157866667	CZB151	DM25-growth
1960	37:40:00	37	A7	0.1618	CZB151	DM25-growth
1961	37:50:00	37	A7	0.169816667	CZB151	DM25-growth
1962	38:00:00	37	A7	0.15765	CZB151	DM25-growth
1963	38:10:00	37	A7	0.155166667	CZB151	DM25-growth
1964	38:20:00	37	A7	0.157733333	CZB151	DM25-growth
1965	38:30:00	37	A7	0.159433333	CZB151	DM25-growth
1966	38:40:00	37	A7	0.1704	CZB151	DM25-growth
1967	38:50:00	37	A7	0.169916667	CZB151	DM25-growth
1968	39:00:00	37	A7	0.165233333	CZB151	DM25-growth
1969	39:10:00	37	A7	0.150133333	CZB151	DM25-growth
1970	39:20:00	37	A7	0.159483333	CZB151	DM25-growth
1971	39:30:00	37	A7	0.1558	CZB151	DM25-growth
1972	39:40:00	37	A7	0.167566667	CZB151	DM25-growth
1973	39:50:00	37	A7	0.155133333	CZB151	DM25-growth
1974	40:00:00	37	A7	0.1587	CZB151	DM25-growth
1975	40:10:00	37	A7	0.156033333	CZB151	DM25-growth
1976	40:20:00	37	A7	0.1514	CZB151	DM25-growth
1977	40:30:00	37	A7	0.156866667	CZB151	DM25-growth
1978	40:40:00	37	A7	0.152033333	CZB151	DM25-growth
1979	40:50:00	37	A7	0.15655	CZB151	DM25-growth
1980	41:00:00	37	A7	0.170183333	CZB151	DM25-growth
1981	41:10:00	37	A7	0.169116667	CZB151	DM25-growth
1982	41:20:00	37	A7	0.15305	CZB151	DM25-growth
1983	41:30:00	37	A7	0.14645	CZB151	DM25-growth
1984	41:40:00	37	A7	0.1488	CZB151	DM25-growth
1985	41:50:00	37	A7	0.164766667	CZB151	DM25-growth
1986	42:00:00	37	A7	0.15465	CZB151	DM25-growth
1987	42:10:00	37	A7	0.14905	CZB151	DM25-growth
1988	42:20:00	37	A7	0.15425	CZB151	DM25-growth
1989	42:30:00	37	A7	0.14815	CZB151	DM25-growth
1990	42:40:00	37	A7	0.150283333	CZB151	DM25-growth
1991	42:50:00	37	A7	0.1768	CZB151	DM25-growth
1992	43:00:00	37	A7	0.157983333	CZB151	DM25-growth
1993	43:10:00	37	A7	0.15595	CZB151	DM25-growth
1994	43:20:00	37	A7	0.156	CZB151	DM25-growth
1995	43:30:00	37	A7	0.1471	CZB151	DM25-growth
1996	43:40:00	37	A7	0.153766667	CZB151	DM25-growth
1997	43:50:00	37	A7	0.145633333	CZB151	DM25-growth
1998	44:00:00	37	A7	0.142983333	CZB151	DM25-growth
[truncated: 25,745 more rows]
