# Supplementary material for: Genomic and phenotypic evolution of Escherichia coli in a novel citrate-only resource environment
Source: eLife. 2020 May 29;9:e55414. doi: 10.7554/eLife.55414 (PMC7299349; doi:10.7554/eLife.55414)
Supplement: Figure 10—source data 1. [file elife-55414-fig10-data1.csv]

Clone	Treatment	Block	P.Dead	PropPrime.Dead	P.Alive	PropPrime.Alive	N
REL606	DM25	1	27	0.238938053	86	0.761061947	113
REL606	DM25	2	482	0.077181745	5763	0.922818255	6245
REL606	DM25	3	193	0.058062575	3131	0.941937425	3324
REL606	DM25	4	833	0.187485933	3610	0.812514067	4443
REL606	DM25	5	234	0.09790795	2156	0.90209205	2390
CZB151	DM0	1	479	0.072586756	6120	0.927413244	6599
CZB151	DM0	2	1313	0.468426686	1490	0.531573314	2803
CZB151	DM0	3	1103	0.140527456	6746	0.859472544	7849
CZB151	DM0	4	4869	0.380034343	7943	0.619965657	12812
CZB151	DM0	5	4320	0.674683742	2083	0.325316258	6403
CZB151	DM25	1	1182	0.282234957	3006	0.717765043	4188
CZB151	DM25	2	3853	0.110129766	31133	0.889870234	34986
CZB151	DM25	3	1673	0.374775986	2791	0.625224014	4464
CZB151	DM25	4	6838	0.565030573	5264	0.434969427	12102
CZB151	DM25	5	6037	0.579589094	4379	0.420410906	10416
ZDBp871	DM0	1	463	0.230462917	1546	0.769537083	2009
ZDBp871	DM0	2	4103	0.47770404	4486	0.52229596	8589
ZDBp871	DM0	3	1463	0.504135079	1439	0.495864921	2902
ZDBp871	DM0	4	4322	0.641341445	2417	0.358658555	6739
ZDBp871	DM0	5	3932	0.585380378	2785	0.414619622	6717
ZDBp871	DM25	1	716	0.217430914	2577	0.782569086	3293
ZDBp871	DM25	2	1589	0.159618282	8366	0.840381718	9955
ZDBp871	DM25	3	10052	0.307475835	22640	0.692524165	32692
ZDBp871	DM25	4	3652	0.295206531	8719	0.704793469	12371
ZDBp871	DM25	5	948	0.109747627	7690	0.890252373	8638
ZDBp910	DM0	5	6565	0.515954102	6159	0.484045898	12724
ZDBp910	DM25	1	110	0.084033613	1199	0.915966387	1309
ZDBp910	DM25	2	3662	0.192493692	15362	0.807506308	19024
ZDBp910	DM25	3	720	0.07722836	8603	0.92277164	9323
ZDBp910	DM25	4	3135	0.09295499	30591	0.90704501	33726
ZDBp910	DM25	5	532	0.233743409	1744	0.766256591	2276
REL11364	DM0	1	423	0.305194805	963	0.694805195	1386
REL11364	DM0	2	1631	0.275972927	4279	0.724027073	5910
REL11364	DM0	3	936	0.412334802	1334	0.587665198	2270
REL11364	DM0	4	5163	0.52802209	4615	0.47197791	9778
REL11364	DM0	5	2006	0.550342936	1639	0.449657064	3645
REL11364	DM25	1	439	0.336398467	866	0.663601533	1305
REL11364	DM25	2	2058	0.227906977	6972	0.772093023	9030
REL11364	DM25	3	4130	0.435011586	5364	0.564988414	9494
REL11364	DM25	4	4327	0.376621116	7162	0.623378884	11489
REL11364	DM25	5	3047	0.801842105	753	0.198157895	3800
