# Supplementary material for: Genomic and phenotypic evolution of Escherichia coli in a novel citrate-only resource environment
Source: eLife. 2020 May 29;9:e55414. doi: 10.7554/eLife.55414 (PMC7299349; doi:10.7554/eLife.55414)
Supplement: Figure 11—source data 2. [file elife-55414-fig11-data2.csv]

ZDBp871	ZDBp875	ZDBp877	ZDBp880	ZDBp883	ZDBp886	ZDBp889	ZDBp892	ZDBp895	ZDBp898	ZDBp901	ZDBp904	ZDBp910	ZDBp911	ZDBp912	ZDBp913	ZDBp914	ZDBp915	ZDBp916	ZDBp917	ZDBp918	ZDBp919	ZDBp920	ZDBp921	Gene
0	0	0	0	1	0	1	0	0	0	0	1	0	1	0	0	0	0	0	1	0	1	0	0	maeA-AMP
0	0	0	1	0	1	0	0	0	1	0	0	0	0	0	1	0	0	0	0	1	1	0	0	dctA-AMP
