# Supplementary material for: Genomic and phenotypic evolution of Escherichia coli in a novel citrate-only resource environment
Source: eLife. 2020 May 29;9:e55414. doi: 10.7554/eLife.55414 (PMC7299349; doi:10.7554/eLife.55414)
Supplement: Figure 11—source data 3. [file elife-55414-fig11-data3.csv]

Gene	Ara–4_REL11336	Ara–3_REL11364	Ara–2_REL11333	Ara–6_REL11389	Ara–5_REL11339	Ara–1_REL11330	Ara+3_REL11345	Ara+6_REL11370	Ara+2_REL11342	Ara+4_REL11348	Ara+5_REL11367	Ara+1_REL11392
malT	4	3	1	3	1	3	3	3	1	0	1	1
metH	1	0	2	1	0	5	2	2	1	0	1	1
thrA	1	1	2	0	1	2	2	3	0	1	1	0
frmR	3	2	4	0	0	0	4	0	1	0	0	0
ycbB	4	1	1	0	1	1	3	2	1	0	0	0
pykF	1	1	1	1	2	1	1	1	1	1	2	1
iclR	1	1	3	1	1	1	1	1	1	1	1	1
mokC	0	2	1	2	2	1	3	0	0	0	1	2
yeeJ	1	0	1	1	0	3	4	3	0	0	0	0
yaiT	1	1	2	0	0	1	1	6	0	0	0	0
nadR	1	1	1	1	1	1	1	1	1	1	1	1
hslU	0	1	1	1	1	1	1	2	1	1	1	1
ycgV	2	0	3	0	0	0	1	5	0	0	0	0
xdhA	1	0	2	0	0	3	4	1	0	0	0	0
mtr	2	3	1	0	0	0	3	2	0	0	0	0
topA	0	3	2	0	2	3	0	1	0	0	0	0
ybaL	1	1	1	0	1	2	1	2	1	0	0	0
hrsA	3	0	0	0	0	0	2	4	0	1	0	0
ydiK	3	0	2	0	0	0	2	2	0	0	1	0
evgS	4	0	1	0	0	2	1	2	0	0	0	0
yfeO	3	1	0	0	0	1	3	2	0	0	0	0
ygiQ	2	0	0	0	0	2	2	3	0	0	0	1
spoT	1	0	1	1	1	1	0	3	1	1	0	0
ECB_00735	3	1	1	0	0	0	4	0	0	0	0	0
ydeU	3	1	1	0	0	2	2	0	0	0	0	0
molR	1	0	1	0	0	1	4	2	0	0	0	0
yeeU	1	1	1	0	0	0	5	0	0	0	0	1
ECB_02816	1	1	0	1	0	2	1	2	0	1	0	0
infB	1	0	1	0	1	1	2	2	0	1	0	0
gltB	2	1	1	0	0	3	0	1	0	1	0	0
ampC	3	1	1	0	0	0	3	1	0	0	0	0
idnT	4	1	1	0	0	0	2	1	0	0	0	0
mokB	0	1	0	3	2	0	0	1	1	0	0	1
ygjG	0	2	1	0	1	1	2	1	0	1	0	0
yjdA	0	0	2	0	0	3	1	3	0	0	0	0
mhpR	1	0	2	0	0	0	1	3	0	1	0	0
ybgG	2	0	1	0	0	1	1	3	0	0	0	0
ycbF	4	0	1	0	0	0	3	0	0	0	0	0
lhr	1	1	2	0	0	3	1	0	0	0	0	0
torY	3	1	0	0	0	1	0	3	0	0	0	0
metG	1	1	0	0	0	1	0	5	0	0	0	0
yehI	1	1	2	0	0	0	1	3	0	0	0	0
yejO	1	1	2	0	0	0	3	1	0	0	0	0
yfaL	5	0	0	0	0	1	0	2	0	0	0	0
pepB	2	1	1	0	0	1	1	2	0	0	0	0
ECB_02821	2	0	2	0	0	0	3	1	0	0	0	0
nlpI	3	0	1	0	0	0	1	2	0	0	1	0
argR	1	0	1	0	0	1	0	2	1	0	1	1
acrF	2	1	0	0	0	1	0	3	0	0	1	0
envZ	2	1	1	1	0	0	0	2	0	1	0	0
yzgL	1	0	1	0	0	2	0	4	0	0	0	0
rhsA	2	0	0	0	0	2	0	3	0	0	0	1
ECB_03460	2	0	2	1	0	0	1	2	0	0	0	0
yjiV	2	0	0	0	0	0	3	3	0	0	0	0
hsdR	1	0	1	0	0	3	2	1	0	0	0	0
yhaM	0	0	1	0	0	3	2	2	0	0	0	0
hsdS	0	0	0	0	1	1	1	1	1	1	1	1
mppA	0	0	0	0	0	2	2	3	0	0	1	0
codB	1	0	3	0	0	0	2	1	0	0	0	0
kdpD	2	0	1	0	0	1	3	0	0	0	0	0
pflB	1	0	0	0	1	1	1	1	0	1	0	1
appC	1	0	0	0	0	1	0	4	1	0	0	0
yccZ	3	1	1	0	0	0	2	0	0	0	0	0
torA	2	0	1	0	0	1	1	1	1	0	0	0
sapA	1	0	3	0	0	1	1	0	0	0	0	1
sfcA	2	0	1	0	0	0	0	4	0	0	0	0
yeaJ	2	0	2	0	0	0	1	2	0	0	0	0
tap	1	0	0	0	0	2	0	3	0	0	0	1
ECB_01906	2	2	1	0	0	0	1	1	0	0	0	0
yfaS	3	0	0	0	0	0	1	3	0	0	0	0
glpT	1	0	2	0	0	0	2	2	0	0	0	0
nuoL	2	0	0	0	0	0	1	4	0	0	0	0
yfdF	3	1	1	0	0	0	2	0	0	0	0	0
yfhM	2	1	0	1	0	0	1	2	0	0	0	0
ptr	4	0	0	0	0	4	0	5	0	0	0	0
yghB	2	1	2	0	0	0	1	1	0	0	0	0
gntT	1	0	1	0	0	1	1	3	0	0	0	0
yhiH	1	0	1	0	0	2	1	2	0	0	0	0
gltS	1	0	1	0	0	2	0	2	0	0	0	1
alsA	1	2	0	0	0	1	1	2	0	0	0	0
ytfN	1	1	0	0	0	0	1	4	0	0	0	0
nagE	0	1	0	0	0	1	2	3	0	0	0	0
ECB_00845	0	1	0	0	0	0	4	2	0	0	0	0
mntH	0	1	0	0	1	1	1	1	1	1	0	0
eaeH	0	0	1	0	0	1	0	5	0	0	0	0
ybiN	0	0	1	0	2	1	1	2	0	0	0	0
yegN	0	0	5	0	0	0	0	2	0	0	0	0
hcaT	0	0	4	0	0	0	0	3	0	0	0	0
arcA	0	0	0	1	0	0	2	0	1	1	1	1
gspA	0	0	0	0	0	1	2	4	0	0	0	0
caiT	1	1	0	0	0	0	1	2	0	0	0	1
secA	1	0	1	0	0	0	2	2	0	0	0	0
ykgE	2	0	2	0	0	0	1	1	0	0	0	0
lacZ	1	1	0	0	0	0	1	2	0	0	0	1
kdpB	1	1	0	0	0	1	2	1	0	0	0	0
yliE	1	0	1	0	1	1	0	2	0	0	0	0
ECB_00834	1	1	1	0	0	0	3	0	0	0	0	0
ybjE	1	0	1	0	1	0	2	0	0	0	1	0
ybjD	1	1	1	0	0	1	1	0	1	0	0	0
fhuE	1	0	0	0	0	2	2	1	0	0	0	0
ycjZ	1	0	1	0	0	2	2	0	0	0	0	0
ECB_01342	1	0	1	0	0	0	2	2	0	0	0	0
yddS	1	0	2	0	0	0	2	1	0	0	0	0
ydhC	3	1	1	0	0	0	0	1	0	0	0	0
ydhV	2	1	1	0	0	0	2	0	0	0	0	0
ptrB	3	0	0	0	0	1	0	2	0	0	0	0
tar	2	0	2	0	0	0	1	1	0	0	0	0
cheA	2	1	0	0	0	0	0	3	0	0	0	0
menD	2	0	1	0	0	1	0	2	0	0	0	0
fadL	1	1	0	0	0	1	2	0	0	0	0	1
acrD	1	0	0	0	0	2	3	0	0	0	0	0
recB	2	0	0	0	0	0	1	3	0	0	0	0
argK	1	0	2	0	0	0	1	2	0	0	0	0
ECB_02798	3	0	1	0	0	0	1	1	0	0	0	0
flu	2	0	0	0	0	0	4	0	0	0	0	0
arcB	2	1	0	0	0	1	0	1	0	0	0	1
chiA	3	0	0	0	0	0	0	3	0	0	0	0
nirB	1	0	0	0	0	0	1	4	0	0	0	0
yhhX	1	1	1	0	0	0	1	2	0	0	0	0
dppB	1	1	0	0	0	1	1	2	0	0	0	0
hupA	2	0	1	0	0	0	2	1	0	0	0	0
actP	1	0	0	1	0	0	1	1	0	0	2	0
acs	1	0	0	1	1	0	0	1	1	1	0	0
nrfE	3	0	3	0	0	0	0	0	0	0	0	0
sgcX	1	0	1	0	0	1	0	3	0	0	0	0
clpX	0	1	0	0	0	1	1	2	0	0	1	0
rhsD	0	1	4	1	0	0	0	0	0	0	0	0
ycbS	0	1	0	0	0	1	0	4	0	0	0	0
ydiM	0	1	1	0	0	0	1	1	0	0	0	1
arpB	0	1	0	0	0	1	1	3	0	0	0	0
yeeF	0	1	0	1	1	1	0	0	2	0	0	0
yfcTU	0	1	0	1	0	1	1	0	0	0	0	2
aas	0	1	0	0	0	1	2	2	0	0	0	0
yeeR	0	1	2	0	0	1	0	2	0	0	0	0
ECB_02838	0	1	2	0	0	0	1	2	0	0	0	0
glcD	0	3	0	0	0	0	2	1	0	0	0	0
rplF	0	1	0	1	1	1	0	1	0	0	1	0
insJ-5	0	2	0	1	0	2	0	0	0	1	0	0
kefA	0	0	2	0	0	1	0	3	0	0	0	0
narZ	0	0	0	2	0	2	0	2	0	0	0	0
yhdG	0	0	0	1	0	0	0	2	0	1	1	1
pcnB	0	0	0	0	0	2	2	2	0	0	0	0
atoC	0	0	0	0	0	1	1	3	0	0	0	1
yfeA	0	0	0	0	0	3	1	2	0	0	0	0
barA	0	0	0	0	0	2	1	3	0	0	0	0
ECB_02836	0	0	0	0	0	1	3	1	1	0	0	0
zntA	0	0	0	0	0	1	2	1	0	0	0	2
ftsZ	1	0	2	0	0	1	1	0	0	0	0	0
hofB	1	0	1	0	0	0	1	2	0	0	0	0
yacH	1	0	1	0	0	0	2	1	0	0	0	0
yadQ	2	0	2	0	0	0	1	0	0	0	0	0
degP	1	0	0	0	0	1	2	1	0	0	0	0
dnaE	2	0	0	0	0	0	1	1	0	0	1	0
ECB_00212	3	0	1	0	0	0	1	0	0	0	0	0
tig	1	1	0	0	0	0	1	2	0	0	0	0
ybbB	1	0	0	0	0	0	0	3	0	0	0	1
mrdA	1	0	2	0	0	1	0	1	0	0	0	0
uvrB	1	1	1	0	0	0	1	1	0	0	0	0
ybiO	2	1	0	0	0	1	1	0	0	0	0	0
yliG	3	0	0	0	0	1	0	1	0	0	0	0
ECB_00831	1	0	1	0	0	0	1	2	0	0	0	0
hcp	1	1	0	0	0	0	1	0	1	0	0	1
mukB	2	0	1	0	0	0	1	1	0	0	0	0
yccC	2	0	0	0	0	0	1	2	0	0	0	0
ycdR	2	0	0	0	0	1	0	2	0	0	0	0
acpP	1	2	0	0	0	0	1	0	0	0	0	1
mfd	1	2	0	0	0	0	0	2	0	0	0	0
ychK	1	0	0	0	0	0	0	4	0	0	0	0
adhE	1	0	0	0	0	0	1	3	0	0	0	0
yciQ	1	1	2	0	0	0	0	1	0	0	0	0
lomR	5	0	0	0	0	0	0	0	0	0	0	0
uidB	1	0	1	0	0	0	1	2	0	0	0	0
rnfC	1	1	0	0	0	0	1	2	0	0	0	0
ydiJ	1	0	0	0	0	1	0	3	0	0	0	0
ydiN	2	1	0	0	0	0	0	2	0	0	0	0
ydiQ	1	0	0	0	1	0	0	2	1	0	0	0
katE	1	1	0	0	0	2	0	1	0	0	0	0
yoaA	2	0	1	0	0	1	0	1	0	0	0	0
yeeA	1	0	0	0	0	2	1	1	0	0	0	0
yegV	1	1	0	0	0	1	0	2	0	0	0	0
lysP	1	0	0	0	0	0	3	1	0	0	0	0
ada	1	1	1	0	0	0	1	1	0	0	0	0
atoS	1	0	0	0	0	2	0	2	0	0	0	0
glpA	1	1	1	0	0	0	0	2	0	0	0	0
hyfB	1	0	2	0	0	0	0	1	0	0	0	1
yfhD	1	1	0	0	0	0	1	2	0	0	0	0
yfhB	1	0	1	0	0	1	1	1	0	0	0	0
hypF	1	0	0	0	0	0	1	3	0	0	0	0
ECB_02652	1	0	1	0	0	0	2	1	0	0	0	0
ygfK	1	0	0	0	0	1	1	2	0	0	0	0
recJ	2	0	1	0	0	0	1	1	0	0	0	0
exuT	2	0	0	0	0	2	0	1	0	0	0	0
mreB	1	0	0	0	0	0	0	0	1	1	1	1
feoB	2	0	0	0	0	0	1	2	0	0	0	0
glpG	1	0	1	1	0	0	0	0	1	0	1	0
yhiP	1	0	1	0	0	0	1	2	0	0	0	0
ECB_03438	1	0	0	0	0	1	0	2	0	0	0	1
yicF	2	1	0	0	0	0	1	1	0	0	0	0
yieN	1	1	0	0	0	0	1	2	0	0	0	0
yihF	1	1	0	0	0	0	0	2	0	0	1	0
rpoB	1	1	0	0	0	2	0	1	0	0	0	0
uvrA	1	1	1	0	1	0	0	1	0	0	0	0
cadC	1	0	1	0	0	1	1	1	0	0	0	0
mutL	1	1	2	0	0	0	0	1	0	0	0	0
hflK	2	1	1	0	0	0	1	0	0	0	0	0
yjfF	2	0	1	0	0	0	0	2	0	0	0	0
mgtA	1	0	0	0	0	2	2	0	0	0	0	0
pyrL	1	1	0	0	0	1	1	1	0	0	0	0
yjgN	1	0	0	1	0	0	1	0	1	0	1	0
yjgR	1	1	0	0	0	0	2	1	0	0	0	0
hsdM	1	0	1	0	0	1	1	1	0	0	0	0
yadE	0	1	1	0	0	0	0	3	0	0	0	0
ldcC	0	1	0	0	0	1	1	2	0	0	0	0
yagX	0	1	3	0	0	0	1	0	0	0	0	0
citA	0	2	1	0	0	0	0	2	0	0	0	0
nagC	0	1	0	0	0	2	1	1	0	0	0	0
ybgQ	0	2	0	0	0	0	2	1	0	0	0	0
narX	0	1	0	0	0	1	1	2	0	0	0	0
narK	0	2	1	0	0	1	0	1	0	0	0	0
recE	0	1	0	0	0	2	0	2	0	0	0	0
ECB_01341	0	1	1	0	0	1	0	2	0	0	0	0
ydbD	0	1	1	0	0	1	0	2	0	0	0	0
ydcJ	0	1	1	0	0	0	2	1	0	0	0	0
pykA	0	2	0	0	1	0	1	0	0	0	0	1
wcaG	0	1	0	0	0	0	1	3	0	0	0	0
mglA	0	2	0	0	0	2	0	1	0	0	0	0
yeiG	0	1	2	0	0	0	2	0	0	0	0	0
cirA	0	2	1	0	0	0	1	0	0	0	1	1
menC	0	2	0	1	0	0	1	0	1	0	0	0
ppk	0	1	1	0	0	0	2	1	0	0	0	0
hscA	0	1	0	0	0	2	2	0	0	0	0	0
yfiH	0	1	0	1	0	0	0	1	0	0	0	2
mutS	0	2	0	0	0	0	2	1	0	0	0	0
sdaC	0	1	1	0	0	1	0	2	0	0	0	0
garP	0	1	1	0	0	0	1	2	0	0	0	0
dctA	0	2	0	0	0	2	0	1	0	0	0	0
yihQ	0	1	0	0	0	1	0	3	0	0	0	0
kdgT	0	1	1	0	0	1	1	1	0	0	0	0
metL	0	2	1	0	0	0	1	0	0	0	1	0
plsB	0	2	0	0	1	0	0	2	0	0	0	0
yjeH	0	1	0	0	0	1	0	3	0	0	0	0
ECB_04148	0	1	1	0	0	0	1	2	0	0	0	0
smp	2	3	0	0	0	1	0	1	0	0	0	0
polB	0	0	1	0	0	1	1	2	0	0	0	0
yadG	0	0	1	0	0	1	0	0	1	1	1	0
fepE	0	0	2	0	0	0	1	2	0	0	0	0
ybeB	0	0	1	0	1	0	0	1	0	0	0	2
ybhJ	0	0	1	0	0	1	2	1	0	0	0	0
phoH	0	0	1	1	1	0	1	0	0	0	0	1
xasA	0	0	1	0	0	2	1	1	0	0	0	0
yniB	0	0	1	0	0	2	0	2	0	0	0	0
yqeB	0	0	1	0	0	0	1	1	2	0	0	0
hybC	0	0	1	0	0	1	0	3	0	0	0	0
rpoD	0	0	2	0	0	0	2	1	0	0	0	0
yicC	0	0	1	0	1	0	1	2	0	0	0	0
yieM	0	0	1	0	0	1	0	3	0	0	0	0
fdoG	0	0	1	0	0	1	0	3	0	0	0	0
slt	0	0	1	0	0	0	3	1	0	0	0	0
arcC	0	0	0	1	0	1	1	2	0	0	0	0
iap	0	0	0	1	1	0	1	2	0	0	0	0
ilvI	0	0	0	0	0	1	2	2	0	0	0	0
ybjS	0	0	0	0	0	1	0	4	0	0	0	0
ycgG	0	0	0	0	0	1	1	2	0	0	0	1
ycjV	0	0	0	0	0	1	0	4	0	0	0	0
dos	0	0	0	0	0	4	0	1	0	0	0	0
yphG	0	0	0	0	0	1	4	0	0	0	0	0
nlpD	0	0	0	0	0	1	0	4	0	0	0	0
fucI	0	1	0	0	0	1	1	3	0	0	0	0
ade	0	0	0	0	0	2	0	3	0	0	0	0
aroG	0	0	0	0	0	0	2	1	0	1	1	0
hybO	0	0	0	0	0	0	2	2	0	0	1	0
waaT	0	0	0	0	0	0	1	4	0	0	0	0
yjjW	0	0	0	0	0	0	2	3	0	0	0	0
ribA	0	0	0	0	0	0	0	5	0	0	0	0
carB	2	0	1	0	0	1	0	0	0	0	0	0
araA	2	0	0	0	0	1	0	1	0	0	0	0
thiP	1	0	0	0	0	0	2	1	0	0	0	0
ftsI	1	0	1	0	1	0	1	0	0	0	0	0
ampE	3	0	0	0	0	1	0	0	0	0	0	0
yaeL	1	0	0	0	0	1	1	1	0	0	0	0
yaeT	1	0	1	0	0	0	2	0	0	0	0	0
tilS	1	0	1	0	0	0	2	0	0	0	0	0
yagW	1	0	0	0	0	0	2	1	0	0	0	0
betB	2	0	1	0	0	0	1	0	0	0	0	0
yahB	1	1	0	0	0	0	1	1	0	0	0	0
clpP	1	0	1	0	0	0	1	1	0	0	0	0
ybaE	1	0	0	0	0	1	1	0	0	1	0	0
cysS	1	0	1	0	0	1	0	1	0	0	0	0
sfmD	1	0	0	0	0	1	1	1	0	0	0	0
gltK	1	0	0	0	0	1	0	2	0	0	0	0
ybgK	1	1	0	0	0	1	0	1	0	0	0	0
hcr	1	0	1	0	0	1	1	0	0	0	0	0
ycaI	2	1	0	0	0	0	0	1	0	0	0	0
pncB	1	0	0	0	0	1	1	1	0	0	0	0
ycbY	2	0	0	0	0	1	0	1	0	0	0	0
yccW	1	0	1	0	0	0	2	0	0	0	0	0
hyaF	1	0	0	0	0	0	2	1	0	0	0	0
torS	1	0	0	0	0	0	2	1	0	0	0	0
torC	1	0	0	0	0	0	2	1	0	0	0	0
ymdC	1	0	1	0	0	1	0	1	0	0	0	0
grxB	2	0	0	0	0	0	1	1	0	0	0	0
mviN	1	0	0	0	0	0	0	3	0	0	0	0
acnA	1	2	0	0	0	0	1	0	0	0	0	0
ydcK	1	1	0	0	0	0	2	0	0	0	0	0
ydcL	3	0	1	0	0	0	0	0	0	0	0	0
fdnG	1	0	0	0	0	0	1	2	0	0	0	0
yddR	1	0	0	0	0	0	1	2	0	0	0	0
ECB_01528	2	0	0	0	0	0	2	0	0	0	0	0
malX	2	0	0	0	0	1	0	1	0	0	0	0
add	1	0	0	0	0	0	2	1	0	0	0	0
gst	1	0	1	0	0	0	2	0	0	0	0	0
sodC	2	0	0	0	0	0	2	0	0	0	0	0
ydhO	1	0	1	0	0	2	0	0	0	0	0	0
ynhG	2	0	0	0	0	0	1	1	0	0	0	0
ydiY	1	0	1	0	0	0	1	1	0	0	0	0
celF	2	1	0	0	0	1	0	0	0	0	0	0
gapA	1	0	0	0	0	1	1	1	0	0	0	0
yeaI	2	0	1	0	0	1	0	0	0	0	0	0
fadD	1	0	0	0	0	2	0	1	0	0	0	0
znuA	2	0	0	0	0	1	0	1	0	0	0	0
yecA	1	1	0	0	0	0	0	2	0	0	0	0
cobU	1	0	1	0	0	1	1	0	0	0	0	0
yegO	1	0	1	0	0	0	0	2	0	0	0	0
ECB_01992	1	0	0	1	0	1	0	0	0	0	0	1
yohI	1	0	0	0	0	2	0	1	0	0	0	0
ccmA	1	1	0	0	0	1	0	0	0	0	1	0
yfaQ	1	0	1	0	1	0	1	0	0	0	0	0
tktB	1	1	0	0	0	0	0	1	1	0	0	0
aegA	1	0	0	0	0	1	1	1	0	0	0	0
pbpC	1	0	0	0	0	0	2	0	0	1	0	0
purL	1	2	0	0	0	0	0	1	0	0	0	0
ECB_02512	1	0	0	0	0	1	0	2	0	0	0	0
proX	2	0	1	0	0	0	0	0	0	0	0	1
yqaB	1	0	0	0	0	0	2	1	0	0	0	0
cysD	1	1	0	0	0	0	1	1	0	0	0	0
ygcN	1	1	0	0	0	0	1	1	0	0	0	0
ygcS	1	1	1	0	0	0	1	0	0	0	0	0
yqcE	1	2	0	0	0	0	0	1	0	0	0	0
ygcE	2	0	1	0	0	0	0	1	0	0	0	0
tas	2	0	0	0	0	0	0	2	0	0	0	0
ubiH	1	1	0	0	0	1	1	0	0	0	0	0
ygfI	1	0	0	0	0	1	2	0	0	0	0	0
yghF	1	0	1	0	0	1	1	0	0	0	0	0
yghJ	1	0	0	0	0	1	1	1	0	0	0	0
ygjI	2	0	0	0	0	0	0	2	0	0	0	0
yhbL	2	1	0	0	0	0	0	1	0	0	0	0
rpsD	1	0	0	0	0	1	1	0	1	0	0	0
prlA	1	1	1	1	0	0	0	0	0	0	0	0
kefB	1	0	0	0	0	0	1	1	0	0	0	1
yhgF	2	0	0	0	0	1	0	1	0	0	0	0
yhiM	1	0	0	0	0	0	0	3	0	0	0	0
selB	1	1	1	0	0	0	0	1	0	0	0	0
ECB_03520	2	0	0	0	0	0	0	2	0	0	0	0
trmE	1	0	0	0	0	1	1	1	0	0	0	0
bglB	1	1	0	0	0	0	0	2	0	0	0	0
yifB	1	0	0	0	0	0	1	2	0	0	0	0
aslA	1	1	0	0	0	0	0	1	0	0	0	1
rarD	1	0	0	0	0	2	0	1	0	0	0	0
ECB_03719	1	0	0	0	0	0	0	2	0	0	0	1
ECB_03786	1	0	0	0	0	1	2	0	0	0	0	0
katG	1	0	0	0	0	0	0	3	0	0	0	0
ppc	1	0	0	0	0	1	0	2	0	0	0	0
rpoC	1	1	0	0	0	0	0	2	0	0	0	0
zraR	1	0	1	0	0	1	0	1	0	0	0	0
yjcQ	2	0	0	0	0	1	0	1	0	0	0	0
proP	1	0	0	0	0	1	2	0	0	0	0	0
basS	1	0	0	0	0	1	0	2	0	0	0	0
dcuS	1	0	0	0	0	1	0	1	1	0	0	0
cadA	1	0	1	0	0	0	0	2	0	0	0	0
cpdB	1	0	0	0	0	1	1	1	0	0	0	0
creD	1	0	0	0	0	0	3	0	0	0	0	0
dnaJ	0	1	1	0	0	1	0	1	0	0	0	0
nhaA	0	1	1	0	0	0	1	1	0	0	0	0
aroP	0	1	0	0	0	0	3	0	0	0	0	0
htrE	0	1	0	0	0	1	0	2	0	0	0	0
acrB	0	1	1	0	0	1	0	1	0	0	0	0
gltI	0	1	0	0	0	1	0	2	0	0	0	0
gpmA	0	1	0	0	0	2	1	0	0	0	0	0
ECB_00726	0	1	1	0	0	2	0	0	0	0	0	0
poxB	0	1	0	0	0	0	1	2	0	0	0	0
hyaB	0	1	0	0	0	1	1	1	0	0	0	0
ymcA	0	1	1	0	0	1	1	0	0	0	0	0
flgK	0	1	0	0	0	0	0	3	0	0	0	0
dhaR	0	1	0	0	0	0	1	2	0	0	0	0
ydcP	0	1	0	0	0	0	1	2	0	0	0	0
ECB_01510	0	0	0	0	0	1	0	2	0	0	0	0
mlc	0	1	0	0	0	0	1	2	0	0	0	0
nemA	0	1	1	0	0	0	0	2	0	0	0	0
purT	0	1	1	0	0	0	1	1	0	0	0	0
yejA	0	1	1	0	0	0	1	1	0	0	0	0
mepA	0	2	0	0	1	0	1	0	0	0	0	0
emrK	0	1	1	0	0	0	1	1	0	0	0	0
hcaE	0	1	0	0	0	0	2	1	0	0	0	0
ECB_02509	0	1	1	0	0	1	1	0	0	0	0	0
glcF	0	1	0	0	0	0	0	3	0	0	0	0
tdcG	0	1	0	0	0	3	0	0	0	0	0	0
yhdP	0	1	1	0	0	1	0	1	0	0	0	0
gspD	0	1	0	0	0	0	0	3	0	0	0	0
yhjO	0	1	0	0	0	1	0	2	0	0	0	0
glmS	0	1	0	0	0	0	1	1	0	0	1	0
ilvG	0	2	1	0	0	0	0	1	0	0	0	0
yjbH	0	1	1	0	0	1	0	1	0	0	0	0
sgaU	0	1	0	0	0	0	2	1	0	0	0	0
ytfQ	0	1	0	0	0	1	1	1	0	0	0	0
treC	0	1	0	0	0	1	0	2	0	0	0	0
yjhB	0	1	0	0	0	0	2	1	0	0	0	0
fimA	0	1	0	0	0	1	1	1	0	0	0	0
mdoB	0	1	0	0	0	1	1	1	0	0	0	0
rihC	0	0	1	0	0	1	2	0	0	0	0	0
yajF	0	0	1	0	0	0	3	0	0	0	0	0
phoR	0	0	1	0	0	0	1	1	0	1	0	0
queA	0	0	1	0	0	0	1	1	0	0	0	1
gcl	0	0	1	0	0	1	1	1	0	0	0	0
asnB	0	0	1	0	0	1	1	1	0	0	0	0
artJ	0	0	1	0	0	0	2	1	0	0	0	0
ycdS	0	0	1	0	0	0	2	1	0	0	0	0
ycfD	0	0	1	0	0	1	0	2	0	0	0	0
ycgH	0	0	1	0	0	2	0	1	0	0	0	0
cysB	0	0	1	0	0	1	1	1	0	0	0	0
rstB	0	0	2	0	0	0	0	2	0	0	0	0
yebK	0	0	1	0	0	0	1	1	0	0	0	1
yejH	0	0	2	0	0	0	1	1	0	0	0	0
atoB	0	0	1	0	0	0	3	0	0	0	0	0
yfcE	0	0	1	0	0	1	1	1	0	0	0	0
yfdW	0	0	1	0	0	1	0	2	0	0	0	0
focB	0	0	1	0	0	0	2	1	0	0	0	0
yfgF	0	0	1	0	0	1	0	2	0	0	0	0
ygaZ	0	0	1	1	0	0	0	2	0	0	0	0
ascF	0	0	2	0	0	0	1	0	0	0	1	0
ygcQ	0	0	1	0	0	2	0	1	0	0	0	0
ygdH	0	0	1	0	0	1	1	1	0	0	0	0
recC	0	0	1	0	0	1	2	0	0	0	0	0
ppdA	0	0	1	0	0	2	1	0	0	0	0	0
ygeZ	0	0	2	0	0	0	0	2	0	0	0	0
ygjT	0	0	1	0	0	0	1	2	0	0	0	0
agaZ	0	0	2	0	0	0	1	1	0	0	0	0
yhfK	0	0	1	0	0	0	1	2	0	0	0	0
treF	0	0	1	0	0	0	0	3	0	0	0	0
yhjG	0	0	2	0	0	0	0	2	0	0	0	0
dppA	0	0	1	0	0	1	1	1	0	0	0	0
yicL	0	0	1	1	0	0	1	1	0	0	0	0
metR	0	0	1	0	0	0	0	2	0	1	0	0
yihN	0	0	1	0	0	1	0	2	0	0	0	0
pflD	0	0	1	0	0	3	0	0	0	0	0	0
alr	0	0	2	0	0	0	1	1	0	0	0	0
ytfR	0	0	1	0	0	0	2	1	0	0	0	0
yadH	0	0	0	1	0	0	2	0	0	1	0	0
ECB_02621	0	0	0	1	0	1	1	1	0	0	0	0
rne	0	0	0	0	1	0	1	1	0	0	1	0
yihP	0	0	0	0	1	0	1	1	1	0	0	0
imp	0	0	0	0	0	1	1	2	0	0	0	0
yhhI	0	0	0	0	0	1	1	2	0	0	0	0
yahJ	0	0	0	0	0	1	2	1	0	0	0	0
sbcC	0	0	0	0	0	1	1	2	0	0	0	0
maa	0	0	0	0	0	2	1	1	0	0	0	0
pgm	0	0	0	0	0	1	2	1	0	0	0	0
sucB	0	0	0	0	0	1	1	1	1	0	0	0
deoR	0	0	0	0	0	1	0	2	0	0	0	1
ybjX	0	0	0	0	0	1	0	3	0	0	0	0
ycbG	0	0	0	0	0	2	1	1	0	0	0	0
plsX	0	0	0	0	0	1	2	1	0	0	0	0
treA	0	0	0	0	0	1	0	3	0	0	0	0
ycjL	0	0	0	0	0	2	1	1	0	0	0	0
hrpA	0	0	0	0	0	2	0	2	0	0	0	0
yoaE	0	0	0	0	0	1	2	0	0	0	0	1
yegI	0	0	0	0	0	3	1	0	0	0	0	0
yehQ	0	0	0	0	0	1	1	2	0	0	0	0
alaS	0	0	0	0	0	1	1	2	0	0	0	0
hycC	0	0	0	0	0	1	0	3	0	0	0	0
ygeW	0	0	0	0	0	1	1	2	0	0	0	0
ECB_02797	0	0	0	0	0	1	2	1	0	0	0	0
ECB_02831	0	0	0	0	0	1	2	1	0	0	0	0
yghK	0	0	0	0	0	1	0	3	0	0	0	0
malQ	0	0	0	0	0	1	2	1	0	0	0	0
malP	0	0	0	0	0	1	2	1	0	0	0	0
yhiS	0	0	0	0	0	1	1	2	0	0	0	0
yibA	0	0	0	0	0	1	0	3	0	0	0	0
waaW	0	0	0	0	0	1	0	3	0	0	0	0
yicK	0	0	0	0	0	2	0	2	0	0	0	0
rep	0	0	0	0	0	1	1	2	0	0	0	0
yihG	0	0	0	0	0	1	0	3	0	0	0	0
yjcE	0	0	0	0	0	1	0	2	0	1	0	0
yjcO	0	0	0	0	0	1	0	1	0	0	0	2
cadB	0	0	0	0	0	1	0	3	0	0	0	0
yjeM	0	0	0	0	0	1	1	2	0	0	0	0
yjeP	0	0	0	0	0	2	1	1	0	0	0	0
yjgB	0	0	0	0	0	1	1	2	0	0	0	0
gntP	0	0	0	0	0	1	3	0	0	0	0	0
secD	0	0	0	0	0	0	2	2	0	0	0	0
fepA	0	0	0	0	0	0	3	1	0	0	0	0
pnuC	0	0	0	0	0	0	3	1	0	0	0	0
ybhH	0	0	0	0	0	0	1	3	0	0	0	0
moaB	0	0	0	0	0	0	4	0	0	0	0	0
ftsK	0	0	0	0	0	0	1	2	0	0	0	1
umuC	0	0	0	0	0	0	1	3	0	0	0	0
ompN	0	0	0	0	0	0	1	3	0	0	0	0
yebS	0	0	0	0	0	0	3	1	0	0	0	0
yfbS	0	0	0	0	0	0	2	2	0	0	0	0
yfcC	0	0	0	0	0	0	1	3	0	0	0	0
ygeR	0	0	0	0	0	0	4	0	0	0	0	0
yhbH	0	0	0	0	0	0	1	3	0	0	0	0
ydbH	0	0	0	0	0	0	0	4	0	0	0	0
yecP	0	0	0	0	0	0	0	4	0	0	0	0
yraM	0	0	0	0	0	0	0	4	0	0	0	0
waaV	0	0	0	0	0	0	0	4	0	0	0	0
nhaR	1	0	0	0	0	0	0	2	0	0	0	0
yabN	1	1	0	0	0	0	0	1	0	0	0	0
coaE	1	1	1	0	0	0	0	0	0	0	0	0
guaC	1	0	0	0	0	1	0	1	0	0	0	0
yadF	1	0	0	0	0	0	0	1	0	1	0	0
sfsA	2	0	0	0	0	0	1	0	0	0	0	0
hrpB	1	1	1	0	0	0	0	0	0	0	0	0
fhiA	2	0	0	0	0	1	0	0	0	0	0	0
proB	1	0	1	0	0	0	1	0	0	0	0	0
yagQ	1	0	0	0	1	0	1	0	0	0	0	0
ykgD	1	0	0	0	0	0	1	0	0	0	0	0
lacI	1	0	1	0	0	0	1	0	0	0	0	0
phoB	1	0	0	0	0	0	1	1	0	0	0	0
tsx	1	0	0	0	0	0	0	2	0	0	0	0
yajO	1	0	0	0	0	0	1	1	0	0	0	0
ECB_00378	1	1	0	0	0	0	0	1	0	0	0	0
lon	1	0	0	0	0	0	0	0	1	0	1	0
fsr	2	1	0	0	0	0	0	0	0	0	0	0
ybcK	1	0	0	0	0	1	0	1	0	0	0	0
entF	1	0	0	0	0	0	2	0	0	0	0	0
ahpF	1	0	0	0	0	1	0	1	0	0	0	0
lipA	2	0	0	0	0	0	0	1	0	0	0	0
ybeF	1	1	0	0	0	0	0	1	0	0	0	0
gltL	2	0	0	0	0	0	1	0	0	0	0	1
speF	1	0	0	0	0	0	0	2	0	0	0	0
ybfO	2	0	0	0	0	0	0	1	0	0	0	0
ECB_00663	3	0	0	0	0	0	0	0	0	0	0	0
ybgA	1	0	0	0	0	0	0	2	0	0	0	0
ybgH	1	1	0	0	0	0	0	1	0	0	0	0
ybgI	1	1	0	0	0	0	0	1	0	0	0	0
modF	1	0	0	0	0	0	1	1	0	0	0	0
bioB	2	0	0	0	0	0	0	1	0	0	0	0
ybhK	1	0	0	0	0	0	1	1	0	0	0	0
ybhS	1	1	1	0	0	0	0	0	0	0	0	0
ybiP	1	0	0	0	0	0	1	1	0	0	0	0
yliF	1	0	0	0	0	0	0	2	0	0	0	0
ECB_00833	1	0	1	0	0	1	0	0	0	0	0	0
ltaE	1	0	1	0	0	0	0	1	0	0	0	0
ycbK	1	0	0	0	0	1	0	1	0	0	0	0
aspC	2	0	0	0	0	1	0	0	0	0	0	0
pqiA	1	0	0	0	0	0	1	1	0	0	0	0
ycbZ	1	0	1	0	0	0	1	0	0	0	0	0
hyaA	1	0	0	0	0	0	1	1	0	0	0	0
torT	1	0	0	0	0	0	1	1	0	0	0	0
ycdW	1	0	0	0	0	1	0	1	0	0	0	0
mdoH	1	0	0	0	0	0	0	2	0	0	0	0
yceL	1	0	0	0	0	0	0	2	0	0	0	0
dsbB	1	0	0	0	0	0	0	2	0	0	0	0
yciR	1	0	0	0	0	1	0	1	0	0	0	0
rnb	1	1	0	0	0	0	0	0	1	0	0	0
aldH	2	0	0	0	0	0	0	1	0	0	0	0
ydcS	3	0	0	0	0	0	0	0	0	0	0	0
yncB	1	0	0	0	0	0	2	0	0	0	0	0
yncD	1	0	0	0	0	0	1	1	0	0	0	0
ydeP	1	0	0	0	0	1	0	1	0	0	0	0
ECB_01464	1	0	0	0	0	0	1	1	0	0	0	0
ydfE	1	0	1	0	0	0	1	0	0	0	0	0
rspA	1	1	0	0	0	0	0	1	0	0	0	0
ynfB	1	0	0	0	0	1	0	1	0	0	0	0
rnfG	1	0	0	0	0	1	0	1	0	0	0	0
ydgR	1	1	1	0	0	0	0	0	0	0	0	0
ydhJ	1	0	0	0	0	0	1	1	0	0	0	0
cfa	1	1	0	0	0	1	0	0	0	0	0	0
ydiL	1	0	1	0	0	1	0	0	0	0	0	0
ydjR	2	0	1	0	0	0	0	0	0	0	0	0
yeaE	1	0	0	0	0	0	0	2	0	0	0	0
yebC	1	0	0	0	0	0	1	1	0	0	0	0
ECB_02000	1	0	0	0	0	2	0	0	0	0	0	0
ECB_02003	1	0	0	0	0	0	2	0	0	0	0	0
gatY	1	1	0	0	0	0	1	0	0	0	0	0
yohK	1	0	0	0	0	0	0	2	0	0	0	0
rtn	1	1	0	0	0	0	0	1	0	0	0	0
bcr	1	0	0	0	0	1	0	1	0	0	0	0
yejM	1	0	1	0	0	0	0	1	0	0	0	0
ccmH	1	0	0	0	0	1	0	1	0	0	0	0
ccmF	1	0	1	0	0	0	1	0	0	0	0	0
rcsC	1	0	0	0	0	0	0	2	0	0	0	0
nuoM	1	0	0	0	0	1	1	0	0	0	0	0
ackA	1	0	0	0	0	0	0	2	0	0	0	0
usg	1	0	0	0	0	0	2	0	0	0	0	0
yfcR	2	0	0	0	0	0	1	0	0	0	0	0
dsdC	1	0	2	0	0	0	0	0	0	0	0	0
yfdZ	1	0	1	0	0	0	0	1	0	0	0	0
yfeG	1	0	0	0	0	1	0	1	0	0	0	0
uraA	1	1	0	0	0	1	0	0	0	0	0	0
upp	1	1	0	0	0	0	2	1	0	0	0	0
ppx	1	0	0	0	0	1	0	0	0	0	1	0
yfiQ	1	0	0	1	0	0	0	1	0	0	0	0
pheA	1	1	0	0	0	1	0	0	0	0	0	0
ygaF	1	1	0	0	0	0	1	0	0	0	0	0
gshA	2	0	0	0	0	0	0	1	0	0	0	0
recX	1	0	0	0	0	2	0	0	0	0	0	0
srlA	1	0	0	0	0	0	0	2	0	0	0	0
hycI	1	0	0	0	0	0	0	2	0	0	0	0
ygbN	1	0	0	0	0	0	1	1	0	0	0	0
ygcM	1	1	1	0	0	0	0	0	0	0	0	0
gudP	1	0	0	0	0	1	0	0	1	0	0	0
fucO	2	0	0	0	0	0	1	0	0	0	0	0
ECB_02650	1	0	0	0	0	1	0	1	0	0	0	0
gcvA	1	0	1	0	0	1	0	0	0	0	0	0
yqeF	1	0	0	0	0	0	1	1	0	0	0	0
gcvP	2	0	1	0	0	0	0	0	0	0	0	0
yggH	1	0	1	0	0	0	1	0	0	0	0	0
ECB_02813	1	0	0	0	0	0	2	0	0	0	0	0
ECB_02814	2	0	0	0	0	0	0	1	0	0	0	0
pppA	1	0	1	0	0	0	0	1	0	0	0	0
ECB_02851	1	1	0	0	0	1	0	0	0	0	0	0
ygiF	1	0	0	0	0	1	0	1	0	0	0	0
ygjD	1	0	0	1	0	1	0	0	0	0	0	0
ygjU	1	0	0	0	0	2	0	0	0	0	0	0
uxaA	1	0	0	0	0	0	1	1	0	0	0	0
yhaJ	1	0	0	0	0	0	1	1	0	0	0	0
yhbE	1	1	0	0	0	0	0	1	0	0	0	0
fis	1	1	0	0	0	1	0	0	0	0	0	0
gspE	1	0	0	0	0	0	1	1	0	0	0	0
fusA	1	0	1	0	0	0	0	1	0	0	0	0
yhfZ	1	0	0	0	0	0	0	2	0	0	0	0
asd	1	0	1	0	0	0	0	1	0	0	0	0
yhhQ	2	0	0	0	0	1	0	0	0	0	0	0
yhiU	1	0	0	0	0	0	1	1	0	0	0	0
yhjQ	2	0	0	0	0	1	0	0	0	0	0	0
yiaH	1	0	0	0	0	0	0	2	0	0	0	0
ECB_03459	1	0	0	0	0	0	0	2	0	0	0	0
secB	1	0	1	0	0	0	0	0	0	0	0	1
tnaA	1	0	1	0	0	0	0	1	0	0	0	0
mioC	2	0	0	0	0	0	1	0	0	0	0	0
yifK	2	0	0	0	0	0	1	0	0	0	0	0
aslB	1	0	0	0	0	1	0	1	0	0	0	0
cyaY	1	0	0	0	0	1	0	1	0	0	0	0
yigE	1	0	1	0	0	1	0	0	0	0	0	0
metE	1	0	1	0	0	0	0	1	0	0	0	0
oxyR	1	0	0	0	0	1	0	1	0	0	0	0
coaA	1	1	0	0	0	0	0	1	0	0	0	0
dinF	2	0	0	0	0	0	0	1	0	0	0	0
phnF	2	0	0	0	0	0	0	1	0	0	0	0
yjcZ	3	0	0	0	0	0	0	0	0	0	0	0
yjdC	1	1	0	0	0	0	1	0	0	0	0	0
yjeJ	1	0	0	0	0	0	0	2	0	0	0	0
yjfI	1	0	1	0	0	0	1	0	0	0	0	0
sgaE	0	0	0	0	0	0	0	2	0	0	0	0
ytfM	1	0	1	0	0	0	0	1	0	0	0	0
ytfT	2	0	0	0	0	1	0	0	0	0	0	0
yjgK	2	0	0	0	0	1	0	0	0	0	0	0
valS	1	0	1	0	0	1	0	0	0	0	0	0
fecA	1	0	0	0	0	0	0	2	0	0	0	0
fimD	1	0	0	0	0	1	0	1	0	0	0	0
fimH	1	0	1	0	0	0	1	0	0	0	0	0
hpaB	1	0	1	0	0	0	1	0	0	0	0	0
yjjM	1	0	1	0	0	0	0	1	0	0	0	0
yaaH	0	2	0	0	0	0	0	1	0	0	0	0
ECB_00022	0	1	0	0	0	0	0	2	0	0	0	0
hepA	0	1	0	0	0	0	1	0	0	1	0	0
setA	0	1	0	0	0	1	1	0	0	0	0	0
aceE	0	1	0	0	0	1	0	1	0	0	0	0
map	0	1	0	0	0	0	1	1	0	0	0	0
fadE	0	2	0	0	0	0	0	0	1	0	0	0
crl	0	1	0	0	0	0	0	2	0	0	0	0
betT	0	1	0	0	0	0	1	1	0	0	0	0
prpE	0	1	0	0	0	1	1	0	0	0	0	0
psiF	0	1	0	0	0	0	2	0	0	0	0	0
proC	0	1	2	0	0	0	0	0	0	0	0	0
hupB	0	2	0	0	0	0	0	0	0	0	0	1
recR	0	1	0	0	0	1	0	1	0	0	0	0
allR	0	1	0	0	0	0	2	0	0	0	0	0
citF	0	1	0	0	0	0	2	0	0	0	0	0
ybeQ	0	1	0	0	0	0	1	1	0	0	0	0
gltA	0	2	0	1	0	0	0	0	0	0	0	0
galT	0	1	0	0	0	0	0	2	0	0	0	0
ybhQ	0	2	0	0	0	0	0	0	0	1	0	0
ybhF	0	1	1	0	0	0	0	1	0	0	0	0
glnQ	0	1	0	0	0	0	1	1	0	0	0	0
ycbT	0	1	1	0	0	0	1	0	0	0	0	0
ycdB	0	1	1	0	0	1	0	0	0	0	0	0
csgG	0	2	0	0	0	0	0	1	0	0	0	0
mdoC	0	1	0	0	0	0	1	1	0	0	0	0
chaA	0	1	0	0	0	0	0	2	0	0	0	0
cls	0	1	0	1	1	0	0	0	0	0	0	0
dbpA	0	1	0	0	0	0	2	0	0	0	0	0
tynA	0	1	1	0	0	0	0	1	0	0	0	0
ydeQ	0	1	0	0	0	1	1	0	0	0	0	0
ydeI	0	1	0	0	0	0	1	1	0	0	0	0
intQ	0	1	1	0	0	0	0	1	0	0	0	0
ydhK	0	2	0	0	1	0	0	0	0	0	0	0
ydhP	0	1	1	0	0	0	0	1	0	0	0	0
ydjL	0	1	0	0	0	2	0	0	0	0	0	0
sdaA	0	1	0	0	0	0	1	1	0	0	0	0
dacD	0	2	0	0	0	0	0	1	0	0	0	0
yeeZ	0	1	0	0	0	0	0	2	0	0	0	0
fbaB	0	1	1	0	0	0	0	1	0	0	0	0
sanA	0	1	1	0	0	0	0	1	0	0	0	0
mglB	0	1	1	0	0	0	0	1	0	0	0	0
menF	0	1	0	0	0	0	2	0	0	0	0	0
dedD	0	1	0	0	0	0	0	0	0	0	2	0
ligA	0	2	0	0	0	1	0	0	0	0	0	0
hyfA	0	1	0	0	1	0	0	1	0	0	0	0
ygbD	0	1	1	0	0	0	0	1	0	0	0	0
lysR	0	1	1	0	0	0	1	0	0	0	0	0
kduD	0	1	0	0	1	1	0	0	0	0	0	0
glcC	0	1	1	0	0	0	0	1	0	0	0	0
yghU	0	1	1	0	0	0	0	1	0	0	0	0
ygiD	0	1	1	0	0	0	0	1	0	0	0	0
ygiE	0	2	0	0	0	0	1	0	0	0	0	0
yqiK	0	1	1	0	0	0	1	0	0	0	0	0
aer	0	1	0	0	0	0	1	1	0	0	0	0
hflB	0	1	0	0	0	0	0	0	0	1	1	0
yheS	0	1	0	0	0	1	1	0	0	0	0	0
rtcR	0	1	0	0	0	1	0	1	0	0	0	0
glpR	0	1	0	0	1	0	0	0	0	1	0	0
glgC	0	1	0	0	1	0	0	1	0	0	0	0
xylA	0	1	0	0	0	1	0	1	0	0	0	0
avtA	0	1	1	0	0	0	0	1	0	0	0	0
yiaU	0	1	0	0	0	0	1	1	0	0	0	0
pyrE	0	1	0	0	0	0	1	1	0	0	0	0
uhpA	0	1	2	0	0	0	0	0	0	0	0	0
yigZ	0	1	0	0	0	1	0	1	0	0	0	0
alsC	0	1	0	0	0	0	0	2	0	0	0	0
aidB	0	2	0	0	0	1	0	0	0	0	0	0
ECB_04072	0	1	0	0	0	0	0	2	0	0	0	0
cycA	0	1	0	0	0	0	1	0	0	0	0	1
fbp	0	1	0	0	0	1	0	1	0	0	0	0
yjjQ	0	1	0	0	0	0	0	2	0	0	0	0
murF	0	0	1	0	0	0	1	1	0	0	0	0
mutT	0	0	1	0	0	1	0	1	0	0	0	0
gcd	0	0	1	0	0	0	1	1	0	0	0	0
proA	0	0	2	0	0	0	0	1	0	0	0	0
ykgF	0	0	1	0	0	1	1	0	0	0	0	0
ykgG	0	0	2	0	0	0	0	1	0	0	0	0
yahE	0	0	1	0	0	0	0	2	0	0	0	0
prpD	0	0	1	0	0	0	0	2	0	0	0	0
mhpB	0	0	1	0	0	0	0	2	0	0	0	0
mhpT	0	0	1	0	0	0	0	2	0	0	0	0
ybbD	0	0	1	0	0	0	2	0	0	0	0	0
ECB_00513	0	0	2	0	0	0	0	1	0	0	0	0
cstA	0	0	1	0	0	1	0	1	0	0	0	0
dsbG	0	0	2	0	0	0	1	0	0	0	0	0
nadA	0	0	1	0	0	0	1	1	0	0	0	0
ECB_00732	0	0	1	0	0	1	0	1	0	0	0	0
ECB_00734	0	0	1	0	0	0	0	2	0	0	0	0
macB	0	0	1	0	0	2	0	0	0	0	0	0
ycaM	0	0	1	0	0	0	0	2	0	0	0	0
pflA	0	0	1	0	0	0	0	2	0	0	0	0
rpsA	0	0	1	0	0	0	1	0	1	0	0	0
pqiB	0	0	1	0	0	0	1	1	0	0	0	0
hyaE	0	0	1	0	0	1	1	0	0	0	0	0
appB	0	0	2	0	0	1	0	0	0	0	0	0
ycfC	0	0	1	0	0	1	0	0	0	0	0	1
hlyE	0	0	1	0	0	0	0	2	0	0	0	0
yciL	0	0	1	0	0	0	0	2	0	0	0	0
ycjM	0	0	1	0	0	0	0	2	0	0	0	0
ynbB	0	0	2	0	0	1	0	0	0	0	0	0
ydcV	0	0	1	0	0	0	1	1	0	0	0	0
ynfF	0	0	1	0	0	2	0	0	0	0	0	0
ydhT	0	0	1	0	0	2	0	0	0	0	0	0
ydjM	0	0	1	0	0	0	1	1	0	0	0	0
yeaG	0	0	1	0	0	0	2	0	0	0	0	0
flhA	0	0	1	0	0	1	1	0	0	0	0	0
ECB_02004	0	0	1	0	0	0	1	1	0	0	0	0
yehY	0	0	1	0	0	1	0	1	0	0	0	0
rplY	0	0	1	0	0	1	1	0	0	0	0	0
glpC	0	0	1	0	0	1	1	0	0	0	0	0
accD	0	0	1	0	0	1	0	1	0	0	0	0
yfeY	0	0	1	0	0	0	0	2	0	0	0	0
cchB	0	0	1	0	0	2	0	0	0	0	0	0
hcaB	0	0	1	0	0	0	1	1	0	0	0	0
yphH	0	0	1	0	0	0	0	2	0	0	0	0
nadB	0	0	2	0	0	0	0	1	0	0	0	0
ECB_02510	0	0	1	0	0	1	1	0	0	0	0	0
gshB	0	0	1	0	0	1	1	0	0	0	0	0
ansB	0	0	1	0	0	0	0	2	0	0	0	0
speC	0	0	1	0	0	1	1	0	0	0	0	0
ECB_02854	0	0	1	0	0	0	1	1	0	0	0	0
ygiC	0	0	1	0	0	0	1	1	0	0	0	0
agaY	0	0	1	0	0	1	1	0	0	0	0	0
yhcC	0	0	1	0	0	1	0	1	0	0	0	0
rpsE	0	0	1	1	0	0	0	1	0	0	0	0
gspK	0	0	1	0	0	0	0	2	0	0	0	0
yheO	0	0	1	0	0	1	1	0	0	0	0	0
prkB	0	0	1	0	0	0	1	1	0	0	0	0
ugpE	0	0	1	0	0	0	1	1	0	0	0	0
rpoH	0	0	1	0	0	0	1	1	0	0	0	0
yhjJ	0	0	1	0	0	0	2	0	0	0	0	0
yhjN	0	0	1	0	0	1	0	1	0	0	0	0
xylF	0	0	1	0	0	0	1	1	0	0	0	0
yiaO	0	0	1	0	0	0	1	1	0	0	0	0
ECB_03519	0	0	1	0	0	0	2	0	0	0	0	0
yicM	0	0	1	0	0	1	1	0	0	0	0	0
yidK	0	0	1	0	0	0	1	1	0	0	0	0
bglF	0	0	1	0	0	0	0	2	0	0	0	0
gppA	0	0	1	0	0	1	0	1	0	0	0	0
cyaA	0	0	1	0	0	1	0	1	0	0	0	0
udp	0	0	1	0	0	0	2	0	0	0	0	0
bipA	0	0	1	0	0	0	1	1	0	0	0	0
sbp	0	0	1	0	0	0	0	2	0	0	0	0
alsB	0	0	1	0	0	0	0	2	0	0	0	0
phnM	0	0	1	0	0	1	0	1	0	0	0	0
melB	0	0	2	0	0	0	0	1	0	0	0	0
dsbD	0	0	1	0	0	0	1	1	0	0	0	0
ECB_04076	0	0	1	0	0	1	0	1	0	0	0	0
yjgL	0	0	1	0	0	2	0	0	0	0	0	0
fimI	0	0	2	0	0	0	0	1	0	0	0	0
fimF	0	0	1	0	0	0	1	1	0	0	0	0
yjiK	0	0	2	0	0	1	0	0	0	0	0	0
ygbJ	0	0	0	1	0	0	2	0	0	0	0	0
yieH	0	0	0	1	0	1	1	0	0	0	0	0
yjcP	0	0	0	1	0	0	1	1	0	0	0	0
yahA	0	0	0	0	1	0	1	1	0	0	0	0
fabF	0	0	0	0	1	0	0	1	0	0	1	0
ydhH	0	0	0	0	1	0	0	1	0	1	0	0
yfaA	0	0	0	0	1	0	2	0	0	0	0	0
ECB_02852	0	0	0	0	1	0	1	1	0	0	0	0
caiD	0	0	0	0	0	1	0	2	0	0	0	0
yabB	0	0	0	0	0	1	0	1	0	1	0	0
hofC	0	0	0	0	0	1	2	0	0	0	0	0
yadD	0	0	0	0	0	1	0	2	0	0	0	0
dksA	0	0	0	0	0	1	0	2	0	0	0	0
hlpA	0	0	0	0	0	1	0	2	0	0	0	0
ribH	0	0	0	0	0	1	2	0	0	0	0	0
thiI	0	0	0	0	0	1	0	1	0	1	0	0
ppiD	0	0	0	0	0	1	0	1	0	0	1	0
ybbP	0	0	0	0	0	2	1	0	0	0	0	0
nfrA	0	0	0	0	0	1	0	2	0	0	0	0
fepB	0	0	0	0	0	1	0	2	0	0	0	0
hscC	0	0	0	0	0	1	1	1	0	0	0	0
galE	0	0	0	0	0	1	0	2	0	0	0	0
helD	0	0	0	0	0	1	1	1	0	0	0	0
ydaA	0	0	0	0	0	2	0	1	0	0	0	0
gapC	0	0	0	0	0	1	0	2	0	0	0	0
ydcN	0	0	0	0	0	2	0	1	0	0	0	0
tyrS	0	0	0	0	0	1	0	2	0	0	0	0
sufA	0	0	0	0	0	1	0	1	0	1	0	0
celB	0	0	0	0	0	1	1	1	0	0	0	0
prc	0	0	0	0	0	1	0	2	0	0	0	0
yecE	0	0	0	0	0	1	0	1	0	0	0	1
cheR	0	0	0	0	0	1	0	2	0	0	0	0
yedV	0	0	0	0	0	1	0	1	0	0	1	0
yegE	0	0	0	0	0	1	0	2	0	0	0	0
yejE	0	0	0	0	0	2	1	0	0	0	0	0
arnT	0	0	0	0	0	1	0	2	0	0	0	0
talA	0	0	0	0	0	2	0	1	0	0	0	0
gcvR	0	0	1	0	0	1	1	1	0	0	0	0
iscS	0	0	0	0	0	2	1	0	0	0	0	0
yfiR	0	0	0	0	0	1	0	2	0	0	0	0
rpoS	0	0	0	0	0	1	1	1	0	0	0	0
gudX	0	0	0	0	0	2	1	0	0	0	0	0
ECB_02648	0	0	0	0	0	1	1	1	0	0	0	0
amiC	0	0	0	0	0	1	2	0	0	0	0	0
galR	0	0	0	0	0	1	0	2	0	0	0	0
bglA	0	0	0	0	0	1	1	1	0	0	0	0
sbm	0	1	1	0	0	3	0	1	0	0	0	0
yqhH	0	0	0	0	0	1	1	0	0	0	0	1
mdaB	0	0	0	0	0	2	0	1	0	0	0	0
parE	0	0	0	0	0	1	0	2	0	0	0	0
tdcE	0	0	0	0	0	2	0	1	0	0	0	0
yrbG	0	0	0	0	0	1	0	2	0	0	0	0
yhjB	0	0	0	0	0	1	1	1	0	0	0	0
malS	0	0	0	0	0	1	0	2	0	0	0	0
yiaN	0	0	0	0	0	1	1	1	0	0	0	0
mutM	0	0	0	0	0	1	1	1	0	0	0	0
yieP	0	0	0	0	0	1	1	1	0	0	0	0
rffT	0	0	0	0	0	1	0	2	0	0	0	0
yihS	0	0	0	0	0	1	0	1	0	0	0	1
yjbB	0	0	0	0	0	1	1	1	0	0	0	0
malE	0	0	0	0	0	1	0	1	0	0	1	0
yjbN	0	0	0	0	0	1	0	2	0	0	0	0
yjdB	0	0	0	0	0	2	0	1	0	0	0	0
yjdE	0	0	0	0	0	1	0	2	0	0	0	0
fumB	0	0	0	0	0	1	0	2	0	0	0	0
yjfC	0	0	0	0	0	1	1	1	0	0	0	0
idnD	0	0	0	0	0	1	1	1	0	0	0	0
yjiJ	0	0	0	0	0	1	2	0	0	0	0	0
sfmC	0	0	0	0	0	0	1	2	0	0	0	0
ybdH	0	0	0	0	0	0	1	2	0	0	0	0
ybdL	0	0	0	0	0	0	1	2	0	0	0	0
sucA	0	0	0	0	0	0	2	1	0	0	0	0
valT	0	0	0	0	0	0	1	1	0	0	0	1
ybhD	0	0	0	0	0	0	1	2	0	0	0	0
ECB_00737	0	0	0	0	0	0	1	1	0	0	0	1
ybiW	0	0	0	0	0	0	0	2	0	0	0	0
cmr	0	0	0	0	0	0	2	1	0	0	0	0
ycaO	0	0	0	0	0	0	1	2	0	0	0	0
mukE	0	0	0	0	0	0	1	2	0	0	0	0
pyrD	0	0	0	0	0	0	3	0	0	0	0	0
yccS	0	0	0	0	0	0	1	2	0	0	0	0
ordL	0	0	0	0	0	0	1	2	0	0	0	0
yncG	0	0	0	0	0	0	2	1	0	0	0	0
ECB_01530	0	0	0	0	0	0	1	2	0	0	0	0
ydhS	0	0	0	0	0	0	2	1	0	0	0	0
astD	0	0	0	0	0	0	1	2	0	0	0	0
ynjC	0	0	0	0	0	0	2	1	0	0	0	0
cheB	0	0	0	0	0	0	2	1	0	0	0	0
otsA	0	0	0	0	0	0	1	2	0	0	0	0
yedY	0	0	0	0	0	0	2	1	0	0	0	0
wzc	0	0	0	0	0	0	1	2	0	0	0	0
yegM	0	0	0	0	0	0	1	2	0	0	0	0
bglX	0	0	0	0	0	0	1	1	0	0	0	0
yejB	0	0	0	0	0	0	1	2	0	0	0	0
yfaW	0	0	0	0	0	0	2	1	0	0	0	0
yfbF	0	0	0	0	0	0	2	1	0	0	0	0
yfcA	0	0	0	0	0	0	1	2	0	0	0	0
hyfD	0	0	0	0	0	0	2	1	0	0	0	0
yphF	0	0	0	0	0	0	2	1	0	0	0	0
yfiK	0	0	0	0	0	0	1	2	0	0	0	0
gabP	0	0	0	0	0	0	2	1	0	0	0	0
yqeC	0	0	0	0	0	0	2	1	0	0	0	0
endA	0	0	0	0	0	0	1	2	0	0	0	0
yggW	0	0	0	0	0	0	2	1	0	0	0	0
ECB_02856	0	0	0	0	0	0	3	0	0	0	0	0
yghS	0	0	0	0	0	0	2	0	0	0	0	1
smf	0	0	0	0	0	0	3	0	0	0	0	0
glgX	0	0	0	0	0	0	1	2	0	0	0	0
yhjA	0	0	0	0	0	0	3	0	0	0	0	0
yhjD	0	0	0	0	0	0	1	2	0	0	0	0
dppC	0	0	0	0	0	0	1	2	0	0	0	0
pstS	0	0	0	0	0	0	1	2	0	0	0	0
ECB_03710	0	0	0	0	0	0	1	1	0	0	0	1
ECB_03715	0	0	0	0	0	0	2	1	0	0	0	0
glpX	0	0	0	0	0	0	1	2	0	0	0	0
yjgH	0	0	0	0	0	0	1	2	0	0	0	0
kefC	0	0	0	0	0	0	0	3	0	0	0	0
ybbN	0	0	0	0	0	0	0	1	0	0	0	2
nfrB	0	0	0	0	0	0	0	3	0	0	0	0
fepC	0	0	0	0	0	0	0	3	0	0	0	0
ECB_00839	0	0	0	0	0	0	0	3	0	0	0	0
nagZ	0	0	0	0	0	0	0	3	0	0	0	0
ymfB	0	0	0	0	0	0	0	3	0	0	0	0
ycgF	0	0	0	0	0	0	0	3	0	0	0	0
yciS	0	0	0	0	0	0	0	3	0	0	0	0
ydeO	0	0	0	0	0	0	0	3	0	0	0	0
speG	0	0	0	0	0	0	0	2	1	0	0	0
torZ	0	0	0	0	0	0	0	3	0	0	0	0
galF	0	0	0	0	0	0	0	2	0	0	1	0
wcaM	0	0	0	0	0	0	0	2	1	0	0	0
yhfT	0	0	0	0	0	0	0	3	0	0	0	0
yidI	0	0	0	0	0	0	0	3	0	0	0	0
yjcC	0	0	0	0	0	0	0	3	0	0	0	0
yjcS	0	0	0	0	0	0	0	3	0	0	0	0
caiC	1	0	0	0	0	0	1	0	0	0	0	0
djlA	1	1	0	0	0	0	0	0	0	0	0	0
leuA	2	0	0	0	0	0	0	0	0	0	0	0
fruR	1	0	0	0	0	0	1	0	0	0	0	0
yacF	1	0	0	0	0	0	0	1	0	0	0	0
fhuC	1	0	0	0	0	0	0	1	0	0	0	0
dgt	1	0	0	0	0	0	0	0	0	0	0	1
tsf	2	0	0	0	0	0	0	0	0	0	0	0
ispC	1	0	1	0	0	0	0	0	0	0	0	0
lpxD	1	0	0	0	0	0	1	0	0	0	0	0
yafC	1	0	0	0	0	0	1	0	0	0	0	0
yafK	1	0	0	0	0	1	0	0	0	0	0	0
ykgK	1	0	1	0	0	0	0	0	0	0	0	0
ykgC	1	0	0	0	0	0	0	1	0	0	0	0
betA	1	0	1	0	0	0	0	0	0	0	0	0
yahI	1	0	0	0	0	1	0	0	0	0	0	0
yahN	1	0	0	0	0	0	0	1	0	0	0	0
mhpF	1	0	0	0	0	0	0	1	0	0	0	0
tauA	1	0	0	0	0	0	1	0	0	0	0	0
hemB	1	0	0	0	0	0	1	0	0	0	0	0
yaiB	1	1	0	0	0	0	0	0	0	0	0	0
phoA	1	0	1	0	0	0	0	0	0	0	0	0
proY	1	0	0	0	0	0	0	1	0	0	0	0
apbA	1	1	0	0	0	0	0	0	0	0	0	0
cyoE	1	0	0	0	0	1	0	0	0	0	0	0
ybaO	1	0	0	0	0	0	1	0	0	0	0	0
ybaP	1	0	0	0	0	0	0	1	0	0	0	0
allB	1	0	0	0	0	0	0	1	0	0	0	0
ybeR	1	0	0	0	0	1	0	0	0	0	0	0
ECB_00624	1	1	0	0	0	0	0	0	0	0	0	0
ybeX	1	0	0	0	0	0	1	0	0	0	0	0
ybfN	1	0	0	0	0	0	0	1	0	0	0	0
rhsC	1	1	0	0	0	0	0	0	0	0	0	0
bioC	1	1	0	0	0	0	0	0	0	0	0	0
ybhO	2	0	0	0	0	0	0	0	0	0	0	0
ybiA	1	0	0	0	0	0	0	1	0	0	0	0
ompX	1	0	1	0	0	0	0	0	0	0	0	0
ECB_00822	1	0	1	0	0	0	0	0	0	0	0	0
ECB_00832	1	0	0	0	0	0	0	1	0	0	0	0
ECB_00841	1	0	0	0	0	0	0	1	0	0	0	0
ybjT	1	0	0	0	0	0	1	0	0	0	0	0
macA	1	0	0	0	0	0	1	0	0	0	0	0
lrp	1	0	0	0	0	0	0	0	1	0	0	0
himD	2	0	0	0	0	0	0	0	0	0	0	0
ycbQ	1	0	0	0	0	0	0	1	0	0	0	0
ycbX	1	0	0	0	0	0	0	1	0	0	0	0
yccE	1	0	0	0	0	0	0	1	0	0	0	0
putA	1	0	0	0	0	0	0	1	0	0	0	0
putP	1	0	1	0	0	0	0	0	0	0	0	0
mdoG	1	0	0	0	0	0	0	1	0	0	0	0
htrB	1	0	0	0	0	1	0	0	0	0	0	0
yceG	1	0	0	0	0	1	0	0	0	0	0	0
oppB	1	0	0	0	0	1	0	0	0	0	0	0
oppD	1	0	0	1	0	0	0	0	0	0	0	0
btuR	1	1	0	0	0	0	0	0	0	0	0	0
sapB	2	0	0	0	0	0	0	0	0	0	0	0
ycjO	1	0	0	0	0	0	0	1	0	0	0	0
abgA	1	0	0	0	0	0	1	0	0	0	0	0
sieB	1	0	0	0	0	0	0	1	0	0	0	0
ydbK	1	0	0	0	0	1	0	0	0	0	0	0
acpD	1	1	0	0	0	0	0	0	0	0	0	0
ydcR	1	0	0	0	0	0	0	1	0	0	0	0
rhsE	1	0	0	0	0	0	0	1	0	0	0	0
yddE	1	0	0	0	0	1	0	0	0	0	0	0
narW	1	1	0	0	0	0	0	0	0	0	0	0
pqqL	1	0	0	0	0	0	0	1	0	0	0	0
ECB_01465	1	0	0	0	0	0	1	0	0	0	0	0
dcp	1	0	0	0	0	0	1	0	0	0	0	0
ydgG	2	0	0	0	0	0	0	0	0	0	0	0
ydgI	2	0	0	0	0	0	0	0	0	0	0	0
slyA	1	0	1	0	0	0	0	0	0	0	0	0
ydiU	2	0	0	0	0	0	0	0	0	0	0	0
ydjC	1	0	0	0	0	0	0	1	0	0	0	0
astB	1	0	0	0	0	0	1	0	0	0	0	0
ydjZ	1	0	0	0	0	1	0	0	0	0	0	0
yeaO	1	0	0	0	0	0	0	1	0	0	0	0
yeaX	1	0	0	0	0	0	0	1	0	0	0	0
kdgR	1	0	1	0	0	0	0	0	0	0	0	0
yebA	1	0	0	0	0	0	0	1	0	0	0	0
flhC	1	0	0	0	0	0	0	1	0	0	0	0
yeeN	1	0	1	0	0	0	0	0	0	0	0	0
hisH	1	0	0	0	0	1	0	0	0	0	0	0
hisA	1	0	0	0	0	0	0	1	0	0	0	0
gmd	1	0	0	0	0	1	0	0	0	0	0	0
wcaC	1	0	0	0	0	0	0	1	0	0	0	0
yegZ	1	0	0	0	0	0	0	1	0	0	0	0
cdd	1	0	0	0	0	0	1	0	0	0	0	0
yeiS	2	0	0	0	0	0	0	0	0	0	0	0
yeiJ	1	0	0	0	0	0	0	1	0	0	0	0
spr	1	1	0	0	0	0	1	0	0	0	0	0
ccmC	1	0	0	0	0	0	0	1	0	0	0	0
napC	1	0	0	0	0	0	0	1	0	0	0	0
napG	1	0	0	0	0	0	0	1	0	0	0	0
ompC	1	0	0	0	0	0	0	1	0	0	0	0
yfaP	1	0	0	0	0	0	1	0	0	0	0	0
gyrA	1	0	0	0	0	0	0	1	0	0	0	0
yfbV	1	0	0	0	0	0	0	1	0	0	0	0
ddg	1	1	0	0	0	0	0	0	0	0	0	0
yfeR	1	1	0	0	0	0	0	0	0	0	0	0
guaB	1	0	0	0	0	1	0	0	0	0	0	0
hmpA	1	0	0	0	0	0	1	0	0	0	0	0
yfhA	1	0	0	0	0	0	0	1	0	0	0	0
yfiO	1	0	0	0	0	0	1	0	0	0	0	0
nrdF	1	0	0	0	0	0	1	0	0	0	0	0
emrB	1	0	0	0	0	0	1	0	0	0	0	0
srlE	1	0	1	0	0	0	0	0	0	0	0	0
hycE	1	0	0	0	0	0	0	1	0	0	0	0
csdA	1	0	0	0	0	1	0	0	0	0	0	0
ssnA	1	0	0	0	0	0	1	0	0	0	0	0
cmtB	1	0	0	0	0	0	1	0	0	0	0	0
speA	1	0	0	0	0	0	1	0	0	0	0	0
yggM	1	0	0	1	0	0	0	0	0	0	0	0
ECB_02819	1	0	0	0	0	0	1	0	0	0	0	0
pitB	1	0	0	0	0	0	0	1	0	0	0	0
yghXY	1	0	0	0	0	1	0	0	0	0	0	0
yghA	1	0	0	0	0	1	0	0	0	0	0	0
yqhG	2	0	0	0	0	0	0	0	0	0	0	0
ygiX	1	0	0	0	0	1	0	0	0	0	0	0
ttdA	1	0	0	0	0	0	1	0	0	0	0	0
dnaG	1	0	0	0	0	1	0	0	0	0	0	0
fadH	1	0	0	0	0	0	1	0	0	0	0	0
agaE	1	0	0	0	0	0	0	1	0	0	0	0
yraR	1	0	1	0	0	0	0	0	0	0	0	0
rbfA	1	1	0	0	0	0	0	0	0	0	0	0
yrbE	1	0	0	0	0	0	1	0	0	0	0	0
dcuD	1	0	1	0	0	0	0	0	0	0	0	0
gspF	1	0	0	0	0	0	0	1	0	0	0	0
argD	1	0	0	0	0	0	0	1	0	0	0	0
yhfN	1	0	0	0	0	1	0	0	0	0	0	0
yhfS	2	0	0	0	0	0	0	0	0	0	0	0
livM	1	0	0	0	0	0	0	1	0	0	0	0
yhhT	1	0	0	0	0	0	0	0	0	0	1	0
yhiQ	1	0	0	0	0	0	0	1	0	0	0	0
yhiE	1	0	0	0	0	0	1	0	0	0	0	0
ECB_03412	1	0	0	0	0	0	0	1	0	0	0	0
aldB	1	0	0	0	0	0	0	1	0	0	0	0
yibH	1	0	0	0	0	0	0	1	0	0	0	0
cysE	1	1	0	0	0	0	0	0	0	0	0	0
rpmB	2	0	0	0	0	0	0	0	0	0	0	0
ECB_03522	1	0	0	0	0	0	0	1	0	0	0	0
yicO	1	0	0	0	0	0	0	1	0	0	0	0
dgoD	1	0	0	0	0	0	0	1	0	0	0	0
dgoK	1	0	0	0	0	0	0	1	0	0	0	0
rho	1	0	0	0	0	0	1	0	0	0	0	0
yihR	1	0	0	0	0	1	0	0	0	0	0	0
yijD	1	0	0	0	0	0	1	0	0	0	0	0
hemE	1	0	0	0	0	1	0	0	0	0	0	0
yjcF	1	0	0	0	0	0	0	1	0	0	0	0
nrfA	2	0	0	0	0	0	0	0	0	0	0	0
phnP	1	0	0	0	0	0	1	0	0	0	0	0
phnK	2	0	0	0	0	0	0	0	0	0	0	0
dcuA	1	0	0	0	0	0	0	1	0	0	0	0
fxsA	1	1	0	0	0	0	0	0	0	0	0	0
frdC	1	0	0	1	0	0	0	0	0	0	0	0
yjeQ	1	0	0	0	0	1	0	0	0	0	0	0
ulaA	1	0	0	0	0	0	0	1	0	0	0	0
ytfA	1	0	0	0	0	0	0	1	0	0	0	0
ytfL	1	0	0	0	0	1	0	0	0	0	0	0
pmbA	1	0	0	0	0	0	0	1	0	0	0	0
intB	1	0	0	0	0	0	0	1	0	0	0	0
yjgZ	1	0	0	0	0	0	0	0	0	0	0	0
fecD	1	0	0	0	0	0	1	0	0	0	0	0
yjhQ	1	0	0	0	0	0	0	1	0	0	0	0
yjhS	1	0	0	0	0	0	0	1	0	0	0	0
fimB	1	0	0	0	0	0	0	1	0	0	0	0
fimC	1	0	0	0	0	0	0	1	0	0	0	0
yjiE	1	0	0	0	0	1	0	0	0	0	0	0
yjiH	1	0	0	0	0	0	1	0	0	0	0	0
hpaC	2	0	0	0	0	0	0	0	0	0	0	0
hpaF	1	0	0	0	0	0	0	1	0	0	0	0
leuQ	1	0	0	0	0	1	0	0	0	0	0	0
yjjG	1	0	0	0	0	1	0	0	0	0	0	0
gpmB	1	0	0	0	0	0	0	1	0	0	0	0
caiB	0	2	0	0	0	0	0	0	0	0	0	0
fhuB	0	1	0	0	0	0	0	1	0	0	0	0
uppS	0	1	0	0	0	0	1	0	0	0	0	0
lacA	0	1	0	0	0	1	0	0	0	0	0	0
yaiL	0	1	0	0	0	0	1	0	0	0	0	0
sbmA	0	1	0	0	0	0	0	1	0	0	0	0
secF	0	1	0	0	0	1	0	0	0	0	0	0
ylaC	0	1	0	0	0	0	1	0	0	0	0	0
dcuC	0	1	0	0	0	0	1	0	0	0	0	0
mrdB	0	1	0	0	0	0	0	1	0	0	0	0
kdpE	0	1	0	0	0	0	0	1	0	0	0	0
ybiB	0	1	0	0	0	0	0	1	0	0	0	0
ybjJ	0	1	1	0	0	0	0	0	0	0	0	0
infA	0	1	0	0	0	0	0	0	0	0	0	1
cydD	0	1	1	0	0	0	0	0	0	0	0	0
lpxK	0	1	0	0	0	0	1	0	0	0	0	0
ycbL	0	1	1	0	0	0	0	0	0	0	0	0
torR	0	1	0	0	0	0	0	1	0	0	0	0
ycdZ	0	1	0	0	0	0	0	1	0	0	0	0
rimJ	0	1	0	0	0	0	0	1	0	0	0	0
flgG	0	2	0	0	0	0	0	0	0	0	0	0
ptsG	0	1	0	0	0	0	0	1	0	0	0	0
ycfX	0	1	1	0	0	0	0	0	0	0	0	0
kch	0	1	0	0	0	0	0	1	0	0	0	0
ycjR	0	1	1	0	0	0	0	0	0	0	0	0
ydaM	0	1	0	0	0	0	0	1	0	0	0	0
ynbC	0	1	0	0	0	0	1	0	0	0	0	0
ECB_01413	0	1	0	0	0	1	0	0	0	0	0	0
yddH	0	1	0	0	0	0	1	0	0	0	0	0
gadB	0	1	0	0	0	0	0	1	0	0	0	0
ECB_01467	0	1	0	0	0	0	0	1	0	0	0	0
ynfM	0	1	0	0	0	0	0	1	0	0	0	0
ydgH	0	1	0	0	0	0	0	1	0	0	0	0
ydhQ	0	1	0	0	0	0	0	1	0	0	0	0
ydhX	0	1	0	0	0	0	0	1	0	0	0	0
ydhY	0	1	0	0	0	0	1	0	0	0	0	0
ydiS	0	1	0	0	0	1	0	0	0	0	0	0
celA	0	1	0	0	0	1	0	0	0	0	0	0
ynjE	0	1	0	0	0	0	0	1	0	0	0	0
topB	0	1	0	0	0	1	0	0	0	0	0	0
yeaR	0	1	0	0	0	0	0	1	0	0	0	0
yedW	0	1	0	0	0	1	0	0	0	0	0	0
amn	0	1	0	0	0	0	1	0	0	0	0	0
yeeY	0	1	0	0	0	0	1	0	0	0	0	0
ECB_02013	0	1	0	0	0	0	1	0	0	0	0	0
dld	0	1	1	0	0	0	1	0	0	0	0	0
yeiE	0	1	0	0	0	0	0	1	0	0	0	0
yeiW	0	1	0	0	0	0	1	0	0	0	0	0
napB	0	1	1	0	0	0	0	0	0	0	0	0
nuoA	0	1	0	0	0	0	0	0	0	0	0	0
pta	0	1	0	0	0	0	0	1	0	0	0	0
yfcM	0	1	0	0	0	1	0	0	0	0	0	0
eutI	0	1	1	0	0	0	0	0	0	0	0	0
maeB	0	1	0	1	0	0	0	0	0	0	0	0
sseA	0	1	1	0	0	0	0	0	0	0	0	0
yphA	0	1	0	0	0	1	0	0	0	0	0	0
yfhK	0	1	0	0	0	0	1	0	0	0	0	0
kgtP	0	1	0	0	0	1	0	0	0	0	0	0
rplS	0	1	0	0	0	0	1	0	0	0	0	0
stpA	0	1	0	0	0	0	1	0	0	0	0	0
ygaX	0	1	0	0	0	1	0	0	0	0	0	0
hypD	0	1	0	0	0	0	0	1	0	0	0	0
eno	0	1	0	0	0	0	1	0	0	0	0	0
yqcD	0	1	0	0	0	1	0	0	0	0	0	0
yggJ	0	1	0	0	0	0	0	1	0	0	0	0
yghO	0	1	0	0	0	0	1	0	0	0	0	0
ECB_02855	0	1	1	0	0	0	0	0	0	0	0	0
ygiS	0	1	0	0	0	0	0	1	0	0	0	0
ygiY	0	1	0	0	0	0	0	1	0	0	0	0
ygjE	0	1	0	0	0	0	1	0	0	0	0	0
ygjV	0	1	0	0	0	0	0	1	0	0	0	0
yhbU	0	1	0	0	0	0	0	1	0	0	0	0
dacB	0	1	0	0	0	0	0	1	0	0	0	0
yhcH	0	1	0	0	0	0	0	1	0	0	0	0
yhcS	0	1	1	0	0	0	0	0	0	0	0	0
rrfD	0	1	0	0	0	0	1	0	0	0	0	0
rpmD	0	1	0	0	0	0	1	0	0	0	0	0
gspC	0	1	0	0	0	0	0	1	0	0	0	0
ppiA	0	1	0	0	0	0	1	0	0	0	0	0
nirD	0	1	0	0	0	0	0	1	0	0	0	0
yhfU	0	1	0	0	0	0	0	1	0	0	0	0
prlC	0	1	0	0	0	1	0	0	0	0	0	0
xylG	0	1	0	0	0	0	0	1	0	0	0	0
yiaV	0	1	0	0	0	0	0	1	0	0	0	0
recF	0	1	0	0	0	0	0	0	0	0	0	1
pstA	0	1	0	0	0	0	0	1	0	0	0	0
atpG	0	1	0	0	0	0	1	0	0	0	0	0
atpI	0	1	0	0	0	0	1	0	0	0	0	0
gidA	0	1	0	0	0	0	1	0	0	0	0	0
kup	0	1	1	0	0	0	0	0	0	0	0	0
ilvC	0	2	0	0	0	0	0	0	0	0	0	0
yihW	0	1	1	0	0	0	0	0	0	0	0	0
yjaH	0	1	0	0	0	1	0	0	0	0	0	0
aceA	0	1	0	0	0	1	0	0	0	0	0	0
arpA	0	1	1	0	0	0	0	0	0	0	0	0
pgi	0	1	0	0	0	0	0	1	0	0	0	0
alsK	0	1	0	0	0	1	0	0	0	0	0	0
yjeB	0	1	0	0	0	0	0	0	0	0	0	1
mpl	0	1	0	0	0	0	0	0	0	0	1	0
fecB	0	1	0	0	0	0	0	1	0	0	0	0
mrr	0	1	0	0	0	0	1	0	0	0	0	0
serB	0	1	0	0	0	0	0	1	0	0	0	0
leuC	0	0	1	0	0	0	1	0	0	0	0	0
cueO	0	0	1	0	0	1	0	0	0	0	0	0
mrcB	0	0	2	0	0	0	0	0	0	0	0	0
yafP	0	0	1	0	0	0	0	1	0	0	0	0
yagR	0	0	1	0	0	1	0	0	0	0	0	0
yahD	0	0	1	0	0	0	1	0	0	0	0	0
lacY	0	0	1	0	0	0	1	0	0	0	0	0
ampG	0	0	1	0	0	0	0	1	0	0	0	0
ybaX	0	0	2	0	0	0	0	0	0	0	0	0
ylaB	0	0	1	0	0	0	0	1	0	0	0	0
ylbE	0	0	1	0	0	0	1	0	0	0	0	0
ybcL	0	0	1	0	0	0	0	1	0	0	0	0
ybcU	0	0	1	0	0	0	1	0	0	0	0	0
ybdR	0	0	1	0	0	0	0	1	0	0	0	0
yleA	0	0	1	0	0	0	1	0	0	0	0	0
mntR	0	0	1	0	0	0	1	0	0	0	0	0
ECB_00825	0	0	1	0	0	0	0	1	0	0	0	0
clpA	0	0	1	0	0	0	1	0	0	0	0	0
serS	0	0	1	0	0	0	1	0	0	0	0	0
ycaD	0	0	1	0	0	0	0	1	0	0	0	0
serC	0	0	1	0	0	0	0	1	0	0	0	0
ompF	0	0	1	0	0	0	1	0	0	0	0	0
cbpA	0	0	1	0	0	1	0	0	0	0	0	0
yceD	0	0	1	0	0	1	0	0	0	0	0	0
ycfW	0	0	1	0	0	0	0	1	0	0	0	0
ychM	0	0	1	0	0	0	0	1	0	0	0	0
pyrF	0	0	1	0	0	1	0	0	0	0	0	0
ymjA	0	0	1	0	0	0	0	1	0	0	0	0
ycjP	0	0	1	0	0	0	0	1	0	0	0	0
ycjS	0	0	1	0	0	0	0	1	0	0	0	0
ycjU	0	0	1	0	0	1	0	0	0	0	0	0
abgB	0	0	1	0	0	1	0	0	0	0	0	0
ydaN	0	0	1	0	0	1	0	0	0	0	0	0
ydaO	0	0	1	0	0	0	1	0	0	0	0	0
ydcA	0	0	1	0	0	0	0	1	0	0	0	0
ydcO	0	0	1	0	0	0	0	1	0	0	0	0
yddA	0	0	1	0	0	0	0	1	0	0	0	0
ynfE	0	0	1	0	0	0	0	1	0	0	0	0
ydhM	0	0	1	0	0	0	0	1	0	0	0	0
ydiB	0	0	1	0	0	0	0	1	0	0	0	0
pfkB	0	0	1	0	0	0	1	0	0	0	0	0
astC	0	0	1	0	0	0	0	1	0	0	0	0
ynjB	0	0	1	0	0	0	0	1	0	0	0	0
ansA	0	0	1	0	0	0	1	0	0	0	0	0
ydjG	0	0	1	0	0	1	0	0	0	0	0	0
ECB_01797	0	0	1	0	0	0	1	0	0	0	0	0
aspS	0	0	1	0	0	0	0	1	0	0	0	0
flhB	0	0	1	0	0	0	1	0	0	0	0	0
araH	0	0	1	0	0	0	0	1	0	0	0	0
gatZ	0	0	1	0	0	0	1	0	0	0	0	0
yehW	0	0	1	0	0	1	0	0	0	0	0	0
yojL	0	0	1	0	0	0	0	1	0	0	0	0
atoD	0	0	1	0	0	0	0	1	0	0	0	0
yfaX	0	0	1	0	0	0	0	1	0	0	0	0
nuoG	0	0	1	0	0	1	0	0	0	0	0	0
fabB	0	0	1	0	0	0	1	0	0	0	0	0
aroC	0	0	1	0	0	0	1	0	0	0	0	0
yfcY	0	0	1	0	0	0	1	0	0	0	0	0
emrY	0	0	1	0	0	1	0	0	0	0	0	0
ypdA	0	0	1	0	0	1	0	0	0	0	0	0
cysZ	0	0	1	0	0	0	0	1	0	0	0	0
yfeV	0	0	2	0	0	0	0	0	0	0	0	0
eutG	0	0	1	0	0	0	0	1	0	0	0	0
dapA	0	0	0	0	0	0	1	0	0	0	0	0
hyfF	0	0	1	0	0	0	0	1	0	0	0	0
yphE	0	0	1	0	0	0	0	1	0	0	0	0
clpB	0	0	1	0	0	0	0	1	0	0	0	0
relA	0	0	1	0	0	0	1	0	0	0	0	0
sdaB	0	0	1	0	0	1	0	0	0	0	0	0
fucA	0	0	2	0	0	0	0	0	0	0	0	0
lgt	0	0	1	0	0	0	0	1	0	0	0	0
ptsP	0	0	1	0	0	1	0	0	0	0	0	0
yqeG	0	0	2	0	0	0	0	0	0	0	0	0
ygfQ	0	0	1	0	0	0	0	1	0	0	0	0
dsbC	0	0	1	0	0	1	0	0	0	0	0	0
yggF	0	0	1	0	0	1	0	0	0	0	0	0
yggR	0	0	1	0	0	0	0	1	0	0	0	0
yggL	0	0	2	0	0	0	0	0	0	0	0	0
ECB_02857	0	0	1	0	0	0	1	0	0	0	0	0
yqiH	0	0	1	0	0	1	0	0	0	0	0	0
ttdB	0	0	1	0	0	0	0	1	0	0	0	0
yqjC	0	0	1	0	0	0	0	1	0	0	0	0
yhaB	0	0	1	0	0	1	0	0	0	0	0	0
agaC	0	0	1	0	0	0	1	0	0	0	0	0
yraN	0	0	1	0	0	0	1	0	0	0	0	0
ispB	0	0	2	0	0	0	0	0	0	0	0	0
nanA	0	0	1	0	0	0	0	1	0	0	0	0
degS	0	0	1	0	0	0	0	0	0	1	0	0
yhcP	0	0	1	0	0	1	0	0	0	0	0	0
yhdA	0	0	1	0	0	0	0	1	0	0	0	0
dam	0	0	1	0	0	0	0	1	0	0	0	0
pckA	0	0	1	0	0	1	0	0	0	0	0	0
greB	0	0	1	0	0	0	1	0	0	0	0	0
rtcA	0	0	1	0	0	1	0	0	0	0	0	0
yhiV	0	0	1	0	0	0	1	0	0	0	0	0
yhjY	0	0	1	0	0	0	0	1	0	0	0	0
ECB_03516	0	0	1	0	0	0	0	1	0	0	0	0
ECB_03525	0	0	1	0	0	0	0	1	0	0	0	0
yieL	0	0	1	0	0	0	0	1	0	0	0	0
yieC	0	0	1	0	0	0	0	1	0	0	0	0
yiiE	0	0	1	0	0	0	0	1	0	0	0	0
yiiS	0	0	1	0	0	0	1	0	0	0	0	0
ftsN	0	0	1	0	0	0	1	0	0	0	0	0
nudC	0	0	1	0	0	0	0	0	0	1	0	0
purH	0	0	2	0	0	0	0	0	0	0	0	0
nrfB	0	0	1	0	0	0	0	1	0	0	0	0
phnE	0	0	1	0	0	1	0	0	0	0	0	0
phnC	0	0	1	0	0	0	0	1	0	0	0	0
melA	0	0	1	0	0	1	0	0	0	0	0	0
rnr	0	0	1	0	0	0	1	0	0	0	0	0
yjiPQ	0	0	1	0	0	0	0	1	0	0	0	0
hpaE	0	0	1	0	0	0	0	1	0	0	0	0
infC	0	0	0	1	0	0	0	0	0	1	0	0
ydjO	0	0	0	1	0	1	0	0	0	0	0	0
manY	0	0	0	1	0	0	1	0	0	0	0	0
recO	0	0	0	1	0	0	0	1	0	0	0	0
mreC	0	0	0	1	0	0	1	0	0	0	0	0
envR	0	0	0	1	0	1	0	0	0	0	0	0
murI	0	0	0	1	0	0	0	1	0	0	0	0
ECB_04162	0	0	0	1	0	0	1	0	0	0	0	0
ybeM	0	0	0	0	1	0	0	1	0	0	0	0
ybeA	0	0	0	0	1	1	0	0	0	0	0	0
hyfC	0	0	0	0	1	0	1	0	0	0	0	0
ygbO	0	0	0	0	1	0	0	1	0	0	0	0
nusA	0	0	0	0	1	0	1	0	0	0	0	0
crp	0	0	0	0	1	1	0	0	0	0	0	0
mtlD	0	0	0	0	1	0	1	0	0	0	0	0
yjiX	0	0	0	0	2	0	0	0	0	0	0	0
surA	0	0	0	0	0	1	0	1	0	0	0	0
tbpA	0	0	0	0	0	1	0	1	0	0	0	0
yadC	0	0	0	0	0	1	0	1	0	0	0	0
rof	0	0	0	0	0	1	0	1	0	0	0	0
cutF	0	0	0	0	0	1	0	1	0	0	0	0
yafA	0	0	0	0	0	1	1	0	0	0	0	0
ykgH	0	0	0	0	0	1	0	1	0	0	0	0
yahG	0	0	0	0	0	1	0	1	0	0	0	0
yahK	0	0	0	0	0	1	1	0	0	0	0	0
araJ	0	0	0	0	0	1	0	1	0	0	0	0
brnQ	0	0	0	0	0	1	1	0	0	0	0	0
cof	0	0	0	0	0	2	0	0	0	0	0	0
htpG	0	0	0	0	0	1	0	1	0	0	0	0
emrE	0	0	0	0	0	1	0	1	0	0	0	0
ybcM	0	0	0	0	0	2	0	0	0	0	0	0
ECB_00517	0	0	0	0	0	1	0	1	0	0	0	0
appY	0	0	0	0	0	1	0	1	0	0	0	0
cusR	0	0	0	0	0	1	0	1	0	0	0	0
entC	0	0	0	0	0	1	0	1	0	0	0	0
ybdM	0	0	0	0	0	1	1	0	0	0	0	0
potE	0	0	0	0	0	1	1	0	0	0	0	0
ECB_00738	0	0	0	0	0	1	1	0	0	0	0	0
ssuD	0	0	0	0	0	1	0	1	0	0	0	0
hyaC	0	0	0	0	0	2	0	0	0	0	0	0
ycdI	0	0	0	0	0	1	1	0	0	0	0	0
ycdJ	0	0	0	0	0	1	0	1	0	0	0	0
ycdN	0	0	0	0	0	1	1	0	0	0	0	0
dhaM	0	0	0	0	0	1	0	1	0	0	0	0
pgpB	0	0	0	0	0	1	0	1	0	0	0	0
fabI	0	0	0	0	0	1	0	0	0	1	0	0
goaG	0	0	0	0	0	1	0	1	0	0	0	0
ompG	0	0	0	0	0	1	0	1	0	0	0	0
ynaI	0	0	0	0	0	1	0	1	0	0	0	0
narU	0	0	0	0	0	1	0	1	0	0	0	0
yddL	0	0	0	0	0	1	0	1	0	0	0	0
yddB	0	0	0	0	0	1	0	1	0	0	0	0
ydeN	0	0	0	0	0	1	0	1	0	0	0	0
ydeT	0	0	0	0	0	1	1	0	0	0	0	0
hipA	0	0	0	0	0	1	0	1	0	0	0	0
hokD	0	0	0	0	0	1	0	0	0	0	0	1
ruvB	0	0	0	0	0	1	0	1	0	0	0	0
motA	0	0	0	0	0	1	1	0	0	0	0	0
shiA	0	0	0	0	0	1	0	1	0	0	0	0
cbl	0	0	0	0	0	1	0	1	0	0	0	0
wcaE	0	0	0	0	0	1	0	1	0	0	0	0
wcaD	0	0	0	0	0	1	0	1	0	0	0	0
yegW	0	0	0	0	0	1	0	1	0	0	0	0
yehM	0	0	0	0	0	1	0	1	0	0	0	0
galS	0	0	0	0	0	1	1	0	0	0	0	0
fruB	0	0	0	0	0	1	0	1	0	0	0	0
rsuA	0	0	0	0	0	1	0	1	0	0	0	0
yejK	0	0	0	0	0	1	1	0	0	0	0	0
napA	0	0	0	0	0	1	0	1	0	0	0	0
yojI	0	0	0	0	0	1	1	0	0	0	0	0
nuoH	0	0	0	0	0	1	0	1	0	0	0	0
yfcI	0	0	0	0	0	1	1	0	0	0	0	0
purF	0	0	0	0	0	1	0	1	0	0	0	0
yfcB	0	0	0	0	0	1	1	0	0	0	0	0
ypdG	0	0	0	0	0	1	1	0	0	0	0	0
yfeS	0	0	0	0	0	1	0	1	0	0	0	0
ypeA	0	0	0	0	0	1	1	0	0	0	0	0
amiA	0	0	0	0	0	1	0	1	0	0	0	0
pssA	0	0	0	0	0	1	1	0	0	0	0	0
gabD	0	0	0	0	0	1	0	1	0	0	0	0
proV	0	0	0	0	0	1	0	1	0	0	0	0
hycF	0	0	0	0	0	2	0	0	0	0	0	0
ygcF	0	0	0	0	0	2	0	0	0	0	0	0
fucK	0	0	0	0	0	1	0	1	0	0	0	0
ygdI	0	0	0	0	0	1	0	1	0	0	0	0
lysA	0	0	0	0	0	1	0	1	0	0	0	0
xerD	0	0	0	0	0	1	0	1	0	0	0	0
visC	0	0	0	0	0	1	0	1	0	0	0	0
yggP	0	0	0	0	0	1	0	1	0	0	0	0
mutY	0	0	0	0	0	1	0	1	0	0	0	0
ECB_02827	0	0	0	0	0	1	0	1	0	0	0	0
yghE	0	0	0	0	0	1	1	0	0	0	0	0
yghG	0	0	0	0	0	1	1	0	0	0	0	0
ebgR	0	0	0	0	0	1	0	1	0	0	0	0
ygjK	0	0	0	0	0	1	1	0	0	0	0	0
yqjG	0	0	0	0	0	1	1	0	0	0	0	0
yhaO	0	0	0	0	0	1	0	1	0	0	0	0
garD	0	0	0	0	0	1	1	0	0	0	0	0
nanK	0	0	0	0	0	1	0	1	0	0	0	0
acrE	0	0	0	0	0	1	1	0	0	0	0	0
mscL	0	0	0	0	0	1	0	1	0	0	0	0
yhfM	0	0	0	0	0	1	0	1	0	0	0	0
yrfF	0	0	0	0	0	1	1	0	0	0	0	0
yhgN	0	0	0	0	0	2	0	0	0	0	0	0
ugpC	0	0	0	0	0	1	0	1	0	0	0	0
livK	0	0	0	0	0	1	0	1	0	0	0	0
acpT	0	0	0	0	0	1	0	1	0	0	0	0
arsC	0	0	0	0	0	1	1	0	0	0	0	0
yhjU	0	0	0	0	0	1	0	1	0	0	0	0
glyQ	0	0	0	0	0	1	0	1	0	0	0	0
lyxK	0	0	0	0	0	1	1	0	0	0	0	0
slmA	0	0	0	0	0	1	0	1	0	0	0	0
yicH	0	0	0	0	0	1	0	1	0	0	0	0
yidR	0	0	0	0	0	2	0	0	0	0	0	0
glmU	0	0	0	0	0	1	1	0	0	0	0	0
rffG	0	0	0	0	0	1	0	1	0	0	0	0
ECB_03693	0	0	0	0	0	1	0	1	0	0	0	0
recQ	0	0	0	0	0	1	0	1	0	0	0	0
rhtC	0	0	0	0	0	1	0	1	0	0	0	0
ECB_03714	0	0	0	0	0	2	0	0	0	0	0	0
yigN	0	0	0	0	0	1	0	1	0	0	0	0
ubiB	0	0	0	0	0	2	0	0	0	0	0	0
hemN	0	0	0	0	0	1	1	0	0	0	0	0
frvR	0	0	0	0	0	1	0	1	0	0	0	0
frvA	0	0	0	0	0	1	0	1	0	0	0	0
rhaD	0	0	0	0	0	2	0	0	0	0	0	0
pfkA	0	0	0	0	0	1	0	1	0	0	0	0
udhA	0	0	0	0	0	1	0	1	0	0	0	0
thiC	0	0	0	0	0	1	0	1	0	0	0	0
yjdL	0	0	0	0	0	1	0	1	0	0	0	0
sugE	0	0	0	0	0	2	0	0	0	0	0	0
yjfR	0	0	0	0	0	1	0	1	0	0	0	0
pyrI	0	0	0	0	0	1	0	1	0	0	0	0
holC	0	0	0	0	0	1	0	1	0	0	0	0
yjhA	0	0	0	0	0	1	1	0	0	0	0	0
uxuB	0	0	0	0	0	1	0	1	0	0	0	0
mcrB	0	0	0	0	0	1	0	1	0	0	0	0
yjiZ	0	0	0	0	0	1	0	1	0	0	0	0
dnaT	0	0	0	0	0	1	1	0	0	0	0	0
deoC	0	0	0	0	0	1	0	1	0	0	0	0
creB	0	0	0	0	0	1	1	0	0	0	0	0
ECB_00020	0	0	0	0	0	0	1	1	0	0	0	0
yaaU	0	0	0	0	0	0	2	0	0	0	0	0
ftsA	0	0	0	0	0	0	1	0	1	0	0	0
lpxB	0	0	0	0	0	0	2	0	0	0	0	0
yahF	0	0	0	0	0	0	2	0	0	0	0	0
frmA	0	0	0	0	0	0	1	1	0	0	0	0
tauB	0	0	0	0	0	0	1	1	0	0	0	0
yaiW	0	0	0	0	0	0	2	0	0	0	0	0
malZ	0	0	0	0	0	0	1	1	0	0	0	0
amtB	0	0	0	0	0	0	1	1	0	0	0	0
acrA	0	0	0	0	0	0	2	0	0	0	0	0
copA	0	0	0	0	0	0	1	1	0	0	0	0
ybaT	0	0	0	0	0	0	1	1	0	0	0	0
purK	0	0	0	0	0	0	1	1	0	0	0	0
sfmA	0	0	0	0	0	0	1	1	0	0	0	0
sfmF	0	0	0	0	0	0	1	1	0	0	0	0
entA	0	0	0	0	0	0	2	0	0	0	0	0
ybeV	0	0	0	0	0	0	1	1	0	0	0	0
lnt	0	0	0	0	0	0	1	1	0	0	0	0
ybeZ	0	0	0	0	0	0	1	1	0	0	0	0
nei	0	0	0	0	0	0	1	1	0	0	0	0
sdhB	0	0	0	0	0	0	1	1	0	0	0	0
galM	0	0	0	0	0	0	1	1	0	0	0	0
ECB_00731	0	0	0	0	0	0	1	1	0	0	0	0
ECB_00739	0	0	0	0	0	0	1	1	0	0	0	0
ybiK	0	0	0	0	0	0	1	1	0	0	0	0
ECB_00814	0	0	0	0	0	0	2	0	0	0	0	0
ECB_00815	0	0	0	0	0	0	1	1	0	0	0	0
ECB_00816	0	0	0	0	0	0	2	0	0	0	0	0
ECB_00819	0	0	0	0	0	0	2	0	0	0	0	0
ECB_00849	0	0	0	0	0	0	1	1	0	0	0	0
ycaL	0	0	0	0	0	0	1	1	0	0	0	0
ycbJ	0	0	0	0	0	0	2	0	0	0	0	0
mukF	0	0	0	0	0	0	2	0	0	0	0	0
ymdF	0	0	0	0	0	0	1	1	0	0	0	0
narL	0	0	0	0	0	0	1	1	0	0	0	0
narG	0	0	0	0	0	0	1	1	0	0	0	0
ycjJ	0	0	0	0	0	0	2	0	0	0	0	0
fnr	0	0	0	0	0	0	1	1	0	0	0	0
fdnI	0	0	0	0	0	0	1	1	0	0	0	0
yddO	0	0	0	0	0	0	2	0	0	0	0	0
ynfI	0	0	0	0	0	0	1	1	0	0	0	0
fumA	0	0	0	0	0	0	1	1	0	0	0	0
ydiF	0	0	0	0	0	0	1	1	0	0	0	0
yeaK	0	0	0	0	0	0	1	1	0	0	0	0
yebN	0	0	0	0	0	0	1	1	0	0	0	0
zwf	0	0	0	0	0	0	1	1	0	0	0	0
yecN	0	0	0	0	0	0	1	1	0	0	0	0
cheZ	0	0	0	0	0	0	1	1	0	0	0	0
motB	0	0	0	0	0	0	1	1	0	0	0	0
ftn	0	0	0	0	0	0	1	1	0	0	0	0
cobT	0	0	0	0	0	0	2	0	0	0	0	0
yegL	0	0	0	0	0	0	1	1	0	0	0	0
ECB_02001	0	0	0	0	0	0	1	1	0	0	0	0
thiM	0	0	0	0	0	0	1	1	0	0	0	0
yehT	0	0	0	0	0	0	1	1	0	0	0	0
yeiT	0	0	0	0	0	0	1	1	0	0	0	0
yeiB	0	0	0	0	0	0	2	0	0	0	0	0
rihB	0	0	0	0	0	0	1	1	0	0	0	0
yeiQ	0	0	0	0	0	0	1	1	0	0	0	0
yfaE	0	0	0	0	0	0	1	1	0	0	0	0
yfaD	0	0	0	0	0	0	1	1	0	0	0	0
yfaU	0	0	0	0	0	0	1	1	0	0	0	0
yfaO	0	0	0	0	0	0	2	0	0	0	0	0
yfbH	0	0	0	0	0	0	1	1	0	0	0	0
flk	0	0	0	0	0	0	1	1	0	0	0	0
yfcS	0	0	0	0	0	0	1	1	0	0	0	0
yfcX	0	0	0	0	0	0	1	1	0	0	0	0
lysV	0	0	0	0	0	0	2	0	0	0	0	0
yfeU	0	0	0	0	0	0	2	0	0	0	0	0
eutB	0	0	0	0	0	0	1	1	0	0	0	0
cchA	0	0	0	0	0	0	2	0	0	0	0	0
ypfJ	0	0	0	0	0	0	1	1	0	0	0	0
hyfI	0	0	0	0	0	0	1	1	0	0	0	0
yfiE	0	0	0	0	0	0	1	1	0	0	0	0
yfiP	0	0	0	0	0	0	1	1	0	0	0	0
ffh	0	0	0	0	0	0	1	1	0	0	0	0
ppnK	0	0	0	0	0	0	1	1	0	0	0	0
ECB_02511	0	0	0	0	0	0	1	1	0	0	0	0
emrR	0	0	0	0	0	0	1	1	0	0	0	0
srlB	0	0	0	0	0	0	1	1	0	0	0	0
hycG	0	0	0	0	0	0	1	1	0	0	0	0
ygbI	0	0	0	0	0	0	1	1	0	0	0	0
ygcW	0	0	0	0	0	0	1	1	0	0	0	0
metZ	0	0	0	0	0	0	2	0	0	0	0	0
recD	0	0	0	0	0	0	1	1	0	0	0	0
araE	0	0	0	0	0	0	1	1	0	0	0	0
kduI	0	0	0	0	0	0	2	0	0	0	0	0
glyU	0	0	0	0	0	0	1	1	0	0	0	0
xdhD	0	0	0	0	0	0	2	0	0	0	0	0
ygfU	0	0	0	0	0	0	1	1	0	0	0	0
lysS	0	0	0	0	0	0	1	1	0	0	0	0
ygfB	0	0	0	0	0	0	2	0	0	0	0	0
yqfE	0	0	0	0	0	0	2	0	0	0	0	0
yafZ	0	0	0	0	0	0	2	0	0	0	0	0
tolC	0	0	0	0	0	0	1	1	0	0	0	0
glnE	0	0	0	0	0	0	2	0	0	0	0	0
garK	0	0	0	0	0	0	2	0	0	0	0	0
yhbV	0	0	0	0	0	0	1	1	0	0	0	0
smg	0	0	0	0	0	0	1	1	0	0	0	0
yhfG	0	0	0	0	0	0	2	0	0	0	0	0
cysG	0	0	0	0	0	0	1	1	0	0	0	0
hofQ	0	0	0	0	0	0	1	1	0	0	0	0
mrcA	0	0	0	0	0	0	1	1	0	0	0	0
ompR	0	0	0	0	0	0	1	1	0	0	0	0
gntR	0	0	0	0	0	0	1	1	0	0	0	0
nikB	0	0	0	0	0	0	2	0	0	0	0	0
bisC	0	0	0	0	0	0	1	1	0	0	0	0
yibQ	0	0	0	0	0	0	1	1	0	0	0	0
yicN	0	0	0	0	0	0	1	1	0	0	0	0
dnaN	0	0	0	0	0	0	1	1	0	0	0	0
rfe	0	0	0	0	0	0	1	1	0	0	0	0
pldA	0	0	0	0	0	0	1	1	0	0	0	0
rhaR	0	0	0	0	0	0	1	1	0	0	0	0
rpiR	0	0	0	0	0	0	1	0	0	0	0	1
yjdF	0	0	0	0	0	0	1	1	0	0	0	0
lysU	0	0	0	0	0	0	1	1	0	0	0	0
cysQ	0	0	0	0	0	0	1	1	0	0	0	0
fecI	0	0	0	0	0	0	2	0	0	0	0	0
sgcQ	0	0	0	0	0	0	1	1	0	0	0	0
sgcC	0	0	0	0	0	0	1	1	0	0	0	0
uxuA	0	0	0	0	0	0	2	0	0	0	0	0
yjiW	0	0	0	0	0	0	1	1	0	0	0	0
hpaH	0	0	0	0	0	0	2	0	0	0	0	0
yjjP	0	0	0	0	0	0	1	1	0	0	0	0
bglJ	0	0	0	0	0	0	1	1	0	0	0	0
yjjI	0	0	0	0	0	0	1	1	0	0	0	0
sms	0	0	0	0	0	0	2	0	0	0	0	0
creC	0	0	0	0	0	0	2	0	0	0	0	0
thrL	0	0	0	0	0	0	0	2	0	0	0	0
carA	0	0	0	0	0	0	0	2	0	0	0	0
murG	0	0	0	0	0	0	0	2	0	0	0	0
acnB	0	0	0	0	0	0	0	2	0	0	0	0
yacC	0	0	0	0	0	0	0	2	0	0	0	0
yadN	0	0	0	0	0	0	0	2	0	0	0	0
ligT	0	0	0	0	0	0	0	2	0	0	0	0
gmhB	0	0	0	0	0	0	0	1	0	0	0	1
yafQ	0	0	0	0	0	0	0	2	0	0	0	0
cynR	0	0	0	0	0	0	0	2	0	0	0	0
yaiE	0	0	0	0	0	0	0	2	0	0	0	0
ybbS	0	0	0	0	0	0	0	2	0	0	0	0
glxR	0	0	0	0	0	0	0	2	0	0	0	0
ybcI	0	0	0	0	0	0	0	2	0	0	0	0
nmpC	0	0	0	0	0	0	0	2	0	0	0	0
ECB_00529	0	0	0	0	0	0	0	2	0	0	0	0
cusA	0	0	0	0	0	0	0	2	0	0	0	0
ybdG	0	0	0	0	0	0	0	2	0	0	0	0
citC	0	0	0	0	0	0	0	2	0	0	0	0
ybfGH	0	0	0	0	0	0	0	2	0	0	0	0
ybfA	0	0	0	0	0	0	0	2	0	0	0	0
ybgO	0	0	0	0	0	0	0	2	0	0	0	0
ybgD	0	0	0	0	0	0	0	2	0	0	0	0
ybgR	0	0	0	0	0	0	0	2	0	0	0	0
ECB_00838	0	0	0	0	0	0	0	1	0	0	0	1
ECB_00840	0	0	0	0	0	0	0	2	0	0	0	0
ycaN	0	0	0	0	0	0	0	2	0	0	0	0
ycbU	0	0	0	0	0	0	0	2	0	0	0	0
ycdX	0	0	0	0	0	0	0	2	0	0	0	0
csgD	0	0	0	0	0	0	0	2	0	0	0	0
solA	0	0	0	0	0	0	0	1	0	0	1	0
flgB	0	0	0	0	0	0	0	1	1	0	0	0
flgL	0	0	0	0	0	0	0	2	0	0	0	0
ycgY	0	0	0	0	0	0	0	2	0	0	0	0
hns	0	0	0	0	0	0	0	2	0	0	0	0
ispZ	0	0	0	0	0	0	0	2	0	0	0	0
trpC	0	0	0	0	0	0	0	2	0	0	0	0
pspA	0	0	0	0	0	0	0	2	0	0	0	0
pspC	0	0	0	0	0	0	0	2	0	0	0	0
ycjX	0	0	0	0	0	0	0	2	0	0	0	0
ldhA	0	0	0	0	0	0	0	2	0	0	0	0
tehA	0	0	0	0	0	0	0	2	0	0	0	0
ansP	0	0	0	0	0	0	0	2	0	0	0	0
yneL	0	0	0	0	0	0	0	2	0	0	0	0
sotB	0	0	0	0	0	0	0	2	0	0	0	0
eamA	0	0	0	0	0	0	0	2	0	0	0	0
ECB_01540	0	0	0	0	0	0	0	1	1	0	0	0
ydgA	0	0	0	0	0	0	0	2	0	0	0	0
hdhA	0	0	0	0	0	0	0	2	0	0	0	0
ydhB	0	0	0	0	0	0	0	2	0	0	0	0
ydiR	0	0	0	0	0	0	0	2	0	0	0	0
btuC	0	0	0	0	0	0	0	2	0	0	0	0
thrS	0	0	0	0	0	0	0	2	0	0	0	0
yoaB	0	0	0	0	0	0	0	2	0	0	0	0
yebY	0	0	0	0	0	0	0	1	0	0	0	1
yedZ	0	0	0	0	0	0	0	2	0	0	0	0
yeeL	0	0	0	0	0	0	0	2	0	0	0	0
yeeO	0	0	0	0	0	0	0	2	0	0	0	0
hisI	0	0	0	0	0	0	0	2	0	0	0	0
wzy	0	0	0	0	0	0	0	2	0	0	0	0
wbbB	0	0	0	0	0	0	0	2	0	0	0	0
wbbA	0	0	0	0	0	0	0	1	0	0	1	0
wcaL	0	0	0	0	0	0	0	2	0	0	0	0
wzxC	0	0	0	0	0	0	0	2	0	0	0	0
wcaA	0	0	0	0	0	0	0	2	0	0	0	0
wza	0	0	0	0	0	0	0	2	0	0	0	0
alkA	0	0	0	0	0	0	0	2	0	0	0	0
gatC	0	0	0	0	0	0	0	2	0	0	0	0
setB	0	0	0	0	0	0	0	2	0	0	0	0
yejF	0	0	0	0	0	0	0	1	1	0	0	0
yfcH	0	0	0	0	0	0	0	2	0	0	0	0
hisP	0	0	0	0	0	0	0	2	0	0	0	0
dedA	0	0	0	0	0	0	0	2	0	0	0	0
yfcK	0	0	0	0	0	0	0	2	0	0	0	0
ECB_02364	0	0	0	0	0	0	0	1	0	0	1	0
ypfI	0	0	0	0	0	0	0	2	0	0	0	0
yfhR	0	0	0	0	0	0	0	1	1	0	0	0
yfiB	0	0	0	0	0	0	0	2	0	0	0	0
grpE	0	0	0	0	0	0	0	2	0	0	0	0
nrdE	0	0	0	0	0	0	0	2	0	0	0	0
recA	0	0	0	0	0	0	0	2	0	0	0	0
ygbK	0	0	0	0	0	0	0	1	0	0	0	1
gudD	0	0	0	0	0	0	0	2	0	0	0	0
ygfH	0	0	0	0	0	0	0	2	0	0	0	0
tktA	0	0	0	0	0	0	0	2	0	0	0	0
ECB_02828	0	0	0	0	0	0	0	2	0	0	0	0
yghT	0	0	0	0	0	0	0	2	0	0	0	0
ygiU	0	0	0	0	0	0	0	2	0	0	0	0
ygiV	0	0	0	0	0	0	0	2	0	0	0	0
ebgA	0	0	0	0	0	0	0	2	0	0	0	0
uxaC	0	0	0	0	0	0	0	1	0	0	0	1
tdcB	0	0	0	0	0	0	0	2	0	0	0	0
agaA	0	0	0	0	0	0	0	2	0	0	0	0
yraJ	0	0	0	0	0	0	0	2	0	0	0	0
yhbX	0	0	0	0	0	0	0	2	0	0	0	0
yhbG	0	0	0	0	0	0	0	1	1	0	0	0
yhfX	0	0	0	0	0	0	0	1	1	0	0	0
yrfA	0	0	0	0	0	0	0	2	0	0	0	0
yhgH	0	0	0	0	0	0	0	2	0	0	0	0
glpD	0	0	0	0	0	0	0	2	0	0	0	0
yhhN	0	0	0	0	0	0	0	1	0	0	0	1
nikD	0	0	0	0	0	0	0	2	0	0	0	0
nikE	0	0	0	0	0	0	0	2	0	0	0	0
yhjE	0	0	0	0	0	0	0	2	0	0	0	0
xylB	0	0	0	0	0	0	0	2	0	0	0	0
yibF	0	0	0	0	0	0	0	2	0	0	0	0
gpsA	0	0	0	0	0	0	0	2	0	0	0	0
recG	0	0	0	0	0	0	0	2	0	0	0	0
yicJ	0	0	0	0	0	0	0	2	0	0	0	0
ECB_03521	0	0	0	0	0	0	0	2	0	0	0	0
ECB_03531	0	0	0	0	0	0	0	2	0	0	0	0
ECB_03540	0	0	0	0	0	0	0	2	0	0	0	0
uhpC	0	0	0	0	0	0	0	2	0	0	0	0
ibpA	0	0	0	0	0	0	0	2	0	0	0	0
gyrB	0	0	0	0	0	0	0	2	0	0	0	0
bglG	0	0	0	0	0	0	0	2	0	0	0	0
wecD	0	0	0	0	0	0	0	2	0	0	0	0
ECB_03716	0	0	0	0	0	0	0	2	0	0	0	0
fre	0	0	0	0	0	0	0	2	0	0	0	0
yiiT	0	0	0	0	0	0	0	1	0	0	0	1
talC	0	0	0	0	0	0	0	2	0	0	0	0
lamB	0	0	0	0	0	0	0	2	0	0	0	0
qor	0	0	0	0	0	0	0	2	0	0	0	0
dnaB	0	0	0	0	0	0	0	2	0	0	0	0
phnJ	0	0	0	0	0	0	0	2	0	0	0	0
hflC	0	0	0	0	0	0	0	1	0	1	0	0
ytfF	0	0	0	0	0	0	0	2	0	0	0	0
ytfG	0	0	0	0	0	0	0	2	0	0	0	0
sgcR	0	0	0	0	0	0	0	2	0	0	0	0
sgcA	0	0	0	0	0	0	0	2	0	0	0	0
lplA	0	0	0	0	0	0	0	2	0	0	0	0
yjgM	0	0	0	0	0	0	0	0	0	1	0	1
insJ-1	0	0	0	0	0	0	0	0	0	0	0	2
ribF	1	0	0	0	0	0	0	0	0	0	0	0
araD	1	0	0	0	0	0	0	0	0	0	0	0
araB	1	0	0	0	0	0	0	0	0	0	0	0
yabI	1	0	0	0	0	0	0	0	0	0	0	0
ftsW	1	0	0	0	0	0	0	0	0	0	0	0
murC	1	0	0	0	0	0	0	0	0	0	0	0
yadL	1	0	0	0	0	0	0	0	0	0	0	0
yaeI	1	0	0	0	0	0	0	0	0	0	0	0
proS	1	0	0	0	0	0	0	0	0	0	0	0
mltD	1	0	0	0	0	0	0	0	0	0	0	0
yafM	1	0	0	0	0	0	0	0	0	0	0	0
gpt	1	0	0	0	0	0	0	0	0	0	0	0
prpB	1	0	0	0	0	0	0	0	0	0	0	0
ampH	1	0	0	0	0	0	0	0	0	0	0	0
yaiZ	1	0	0	0	0	0	0	0	0	0	0	0
ECB_00376	1	0	0	0	0	0	0	0	0	0	0	0
ybaA	1	0	0	0	0	0	0	0	0	0	0	0
hha	1	0	0	0	0	0	0	0	0	0	0	0
ybbF	1	0	0	0	0	0	0	0	0	0	0	0
folD	1	0	0	0	0	0	0	0	0	0	0	0
glnS	1	0	0	0	0	0	0	0	0	0	0	0
kdpF	1	0	0	0	0	0	0	0	0	0	0	0
ybgC	1	0	0	0	0	0	0	0	0	0	0	0
modC	1	0	0	0	0	0	0	0	0	0	0	0
ECB_00733	1	0	0	0	0	0	0	0	0	0	0	0
moaA	1	0	0	0	0	0	0	0	0	0	0	0
ybhN	1	0	0	0	0	0	0	0	0	0	0	0
yliA	1	0	0	0	0	0	0	0	0	0	0	0
ybjK	1	0	0	0	0	0	0	0	0	0	0	0
ECB_00830	1	0	0	0	0	0	0	0	0	0	0	0
potG	1	0	0	0	0	0	0	0	0	0	0	0
msbA	1	0	0	0	0	0	0	0	0	0	0	0
ssuA	1	0	0	0	0	0	0	0	0	0	0	0
yccA	1	0	0	0	0	0	0	0	0	0	0	0
ycdY	1	0	0	0	0	0	0	0	0	0	0	0
yceE	1	0	0	0	0	0	0	0	0	0	0	0
ycgE	1	0	0	0	0	0	0	0	0	0	0	0
ECB_01147	1	0	0	0	0	0	0	0	0	0	0	0
ycgI	1	0	0	0	0	0	0	0	0	0	0	0
dadA	1	0	0	0	0	0	0	0	0	0	0	0
ychF	1	0	0	0	0	0	0	0	0	0	0	0
ychP	1	0	0	0	0	0	0	0	0	0	0	0
narJ	1	0	0	0	0	0	0	0	0	0	0	0
yciV	1	0	0	0	0	0	0	0	0	0	0	0
ycjD	1	0	0	0	0	0	0	0	0	0	0	0
ycjW	1	0	0	0	0	0	0	0	0	0	0	0
yncC	1	0	0	0	0	0	0	0	0	0	0	0
osmC	1	0	0	0	0	0	0	0	0	0	0	0
ydeS	1	0	0	0	0	0	0	0	0	0	0	0
yneC	1	0	0	0	0	0	0	0	0	0	0	0
yneF	1	0	0	0	0	0	0	0	0	0	0	0
ydfZ	1	0	0	0	0	0	0	0	0	0	0	0
ECB_01535	1	0	0	0	0	0	0	0	0	0	0	0
fumC	1	0	0	0	0	0	0	0	0	0	0	0
ydiP	1	0	0	0	0	0	0	0	0	0	0	0
ydjN	1	0	0	0	0	0	0	0	0	0	0	0
celD	1	0	0	0	0	0	0	0	0	0	0	0
ydjY	1	0	0	0	0	0	0	0	0	0	0	0
nudG	1	0	0	0	0	0	0	0	0	0	0	0
yeaV	1	0	0	0	0	0	0	0	0	0	0	0
yebB	1	0	0	0	0	0	0	0	0	0	0	0
yecG	1	0	0	0	0	0	0	0	0	0	0	0
araF	1	0	0	0	0	0	0	0	0	0	0	0
yecI	1	0	0	0	0	0	0	0	0	0	0	0
yedU	1	0	0	0	0	0	0	0	0	0	0	0
cobS	1	0	0	0	0	0	0	0	0	0	0	0
ogrK	1	0	0	0	0	0	0	0	0	0	0	0
ECB_01998	1	0	0	0	0	0	0	0	0	0	0	0
yehX	1	0	0	0	0	0	0	0	0	0	0	0
yehZ	1	0	0	0	0	0	0	0	0	0	0	0
glpQ	1	0	0	0	0	0	0	0	0	0	0	0
yfaZ	1	0	0	0	0	0	0	0	0	0	0	0
yfbB	1	0	0	0	0	0	0	0	0	0	0	0
yfbM	1	0	0	0	0	0	0	0	0	0	0	0
cysP	1	0	0	0	0	0	0	0	0	0	0	0
iscA	1	0	0	0	0	0	0	0	0	0	0	0
csiE	1	0	0	0	0	0	0	0	0	0	0	0
yphD	1	0	0	0	0	0	0	0	0	0	0	0
yfhG	1	0	0	0	0	0	0	0	0	0	0	0
tyrA	1	0	0	0	0	0	0	0	0	0	0	0
ypjD	1	0	0	0	0	0	0	0	0	0	0	0
smpA	1	0	0	0	0	0	0	0	0	0	0	0
yfjG	1	0	0	0	0	0	0	0	0	0	0	0
smpB	1	0	0	0	0	0	0	0	0	0	0	0
ygaW	1	0	0	0	0	0	0	0	0	0	0	0
nrdI	1	0	0	0	0	0	0	0	0	0	0	0
ygaH	1	0	0	0	0	0	0	0	0	0	0	0
srlD	1	0	0	0	0	0	0	0	0	0	0	0
ygbL	1	0	0	0	0	0	0	0	0	0	0	0
ispF	1	0	0	0	0	0	0	0	0	0	0	0
cysJ	1	0	0	0	0	0	0	0	0	0	0	0
pyrG	1	0	0	0	0	0	0	0	0	0	0	0
ygdQ	1	0	0	0	0	0	0	0	0	0	0	0
ygeA	1	0	0	0	0	0	0	0	0	0	0	0
iciA	1	0	0	0	0	0	0	0	0	0	0	0
yqgE	1	0	0	0	0	0	0	0	0	0	0	0
ECB_02810	1	0	0	0	0	0	0	0	0	0	0	0
dkgA	1	0	0	0	0	0	0	0	0	0	0	0
yqiC	1	0	0	0	0	0	0	0	0	0	0	0
yqiG	1	0	0	0	0	0	0	0	0	0	0	0
ygiP	1	0	0	0	0	0	0	0	0	0	0	0
ygjO	1	0	0	0	0	0	0	0	0	0	0	0
yqjD	1	0	0	0	0	0	0	0	0	0	0	0
yhaL	1	0	0	0	0	0	0	0	0	0	0	0
tdcA	1	0	0	0	0	0	0	0	0	0	0	0
agaD	1	0	0	0	0	0	0	0	0	0	0	0
ptsO	1	0	0	0	0	0	0	0	0	0	0	0
rplO	1	0	0	0	0	0	0	0	0	0	0	0
rplR	1	0	0	0	0	0	0	0	0	0	0	0
rplC	1	0	0	0	0	0	0	0	0	0	0	0
fkpA	1	0	0	0	0	0	0	0	0	0	0	0
livG	1	0	0	0	0	0	0	0	0	0	0	0
yhiI	1	0	0	0	0	0	0	0	0	0	0	0
gor	1	0	0	0	0	0	0	0	0	0	0	0
slp	1	0	0	0	0	0	0	0	0	0	0	0
yibK	1	0	0	0	0	0	0	0	0	0	0	0
waaF	1	0	0	0	0	0	0	0	0	0	0	0
waaC	1	0	0	0	0	0	0	0	0	0	0	0
waaA	1	0	0	0	0	0	0	0	0	0	0	0
ECB_03532	1	0	0	0	0	0	0	0	0	0	0	0
uhpT	1	0	0	0	0	0	0	0	0	0	0	0
emrD	1	0	0	0	0	0	0	0	0	0	0	0
yidQ	1	0	0	0	0	0	0	0	0	0	0	0
atpA	1	0	0	0	0	0	0	0	0	0	0	0
wecC	1	0	0	0	0	0	0	0	0	0	0	0
pldB	1	0	0	0	0	0	0	0	0	0	0	0
ECB_03713	1	0	0	0	0	0	0	0	0	0	0	0
pepQ	1	0	0	0	0	0	0	0	0	0	0	0
mobA	1	0	0	0	0	0	0	0	0	0	0	0
yihE	1	0	0	0	0	0	0	0	0	0	0	0
yshA	1	0	0	0	0	0	0	0	0	0	0	0
fdhD	1	0	0	0	0	0	0	0	0	0	0	0
rhaB	1	0	0	0	0	0	0	0	0	0	0	0
yjbD	1	0	0	0	0	0	0	0	0	0	0	0
ssb	1	0	0	0	0	0	0	0	0	0	0	0
nrfF	1	0	0	0	0	0	0	0	0	0	0	0
fdhF	1	0	0	0	0	0	0	0	0	0	0	0
yjeT	1	0	0	0	0	0	0	0	0	0	0	0
yjfJ	1	0	0	0	0	0	0	0	0	0	0	0
ECB_04074	1	0	0	0	0	0	0	0	0	0	0	0
ECB_04075	1	0	0	0	0	0	0	0	0	0	0	0
msrA	1	0	0	0	0	0	0	0	0	0	0	0
fecE	1	0	0	0	0	0	0	0	0	0	0	0
sgcE	1	0	0	0	0	0	0	0	0	0	0	0
yjiO	1	0	0	0	0	0	0	0	0	0	0	0
hpaG	1	0	0	0	0	0	0	0	0	0	0	0
leuP	1	0	0	0	0	0	0	0	0	0	0	0
talB	0	1	0	0	0	0	0	0	0	0	0	0
ddl	0	1	0	0	0	0	0	0	0	0	0	0
yadK	0	1	0	0	0	0	0	0	0	0	0	0
pyrH	0	1	0	0	0	0	0	0	0	0	0	0
yafE	0	1	0	0	0	0	0	0	0	0	0	0
cynX	0	1	0	0	0	0	0	0	0	0	0	0
frmB	0	1	0	0	0	0	0	0	0	0	0	0
ykiA	0	1	0	0	0	0	0	0	0	0	0	0
tesB	0	1	0	0	0	0	0	0	0	0	0	0
ybaZ	0	1	0	0	0	0	0	0	0	0	0	0
ybaM	0	1	0	0	0	0	0	0	0	0	0	0
ylbF	0	1	0	0	0	0	0	0	0	0	0	0
ybcQ	0	1	0	0	0	0	0	0	0	0	0	0
ybfM	0	1	0	0	0	0	0	0	0	0	0	0
fur	0	1	0	0	0	0	0	0	0	0	0	0
ybhG	0	1	0	0	0	0	0	0	0	0	0	0
ybiC	0	1	0	0	0	0	0	0	0	0	0	0
ybiI	0	1	0	0	0	0	0	0	0	0	0	0
yliC	0	1	0	0	0	0	0	0	0	0	0	0
yliD	0	1	0	0	0	0	0	0	0	0	0	0
tfaE	0	1	0	0	0	0	0	0	0	0	0	0
ECB_00851	0	1	0	0	0	0	0	0	0	0	0	0
ybjM	0	1	0	0	0	0	0	0	0	0	0	0
potI	0	1	0	0	0	0	0	0	0	0	0	0
ybjF	0	1	0	0	0	0	0	0	0	0	0	0
dmsA	0	1	0	0	0	0	0	0	0	0	0	0
aroA	0	1	0	0	0	0	0	0	0	0	0	0
agp	0	1	0	0	0	0	0	0	0	0	0	0
yceJ	0	1	0	0	0	0	0	0	0	0	0	0
flgF	0	1	0	0	0	0	0	0	0	0	0	0
ispE	0	1	0	0	0	0	0	0	0	0	0	0
ychN	0	1	0	0	0	0	0	0	0	0	0	0
yciO	0	1	0	0	0	0	0	0	0	0	0	0
pinR	0	1	0	0	0	0	0	0	0	0	0	0
feaB	0	1	0	0	0	0	0	0	0	0	0	0
marA	0	1	0	0	0	0	0	0	0	0	0	0
ECB_01526	0	1	0	0	0	0	0	0	0	0	0	0
ydgJ	0	1	0	0	0	0	0	0	0	0	0	0
sufS	0	1	0	0	0	0	0	0	0	0	0	0
ECB_01757	0	1	0	0	0	0	0	0	0	0	0	0
rnd	0	1	0	0	0	0	0	0	0	0	0	0
yebZ	0	1	0	0	0	0	0	0	0	0	0	0
msbB	0	1	0	0	0	0	0	0	0	0	0	0
otsB	0	1	0	0	0	0	0	0	0	0	0	0
hisD	0	1	0	0	0	0	0	0	0	0	0	0
gatR	0	1	0	0	0	0	0	0	0	0	0	0
nfo	0	1	0	0	0	0	0	0	0	0	0	0
fruA	0	1	0	0	0	0	0	0	0	0	0	0
atoA	0	1	0	0	0	0	0	0	0	0	0	0
yfbG	0	1	0	0	0	0	0	0	0	0	0	0
yfbW	0	1	0	0	0	0	0	0	0	0	0	0
cvpA	0	1	0	0	0	0	0	0	0	0	0	0
gltX	0	1	0	0	0	0	0	0	0	0	0	0
yffI	0	1	0	0	0	0	0	0	0	0	0	0
acpS	0	1	0	0	0	0	0	0	0	0	0	0
yfiN	0	1	0	0	0	0	0	0	0	0	0	0
csiD	0	1	0	0	0	0	0	0	0	0	0	0
nrdH	0	1	0	0	0	0	0	0	0	0	0	0
gutQ	0	1	0	0	0	0	0	0	0	0	0	0
ygaA	0	1	0	0	0	0	0	0	0	0	0	0
hycH	0	1	0	0	0	0	0	0	0	0	0	0
fhlA	0	1	0	0	0	0	0	0	0	0	0	0
pcm	0	1	0	0	0	0	0	0	0	0	0	0
cysN	0	1	0	0	0	0	0	0	0	0	0	0
ygeD	0	1	0	0	0	0	0	0	0	0	0	0
gcvH	0	1	0	0	0	0	0	0	0	0	0	0
cca	0	1	0	0	0	0	0	0	0	0	0	0
yqjI	0	1	0	0	0	0	0	0	0	0	0	0
rpsO	0	1	0	0	0	0	0	0	0	0	0	0
nlp	3	1	1	0	0	1	1	6	0	0	1	0
yrbC	0	1	0	0	0	0	0	0	0	0	0	0
nanE	0	1	0	0	0	0	0	0	0	0	0	0
nanT	0	1	0	0	0	0	0	0	0	0	0	0
yhcQ	0	1	0	0	0	0	0	0	0	0	0	0
rpoA	0	1	0	0	0	0	0	0	0	0	0	0
rpsG	0	1	0	0	0	0	0	0	0	0	0	0
frlC	0	1	0	0	0	0	0	0	0	0	0	0
gph	0	1	0	0	0	0	0	0	0	0	0	0
yhgE	0	1	0	0	0	0	0	0	0	0	0	0
yhhW	0	1	0	0	0	0	0	0	0	0	0	0
ggt	0	1	0	0	0	0	0	0	0	0	0	0
bcsC	0	1	0	0	0	0	0	0	0	0	0	0
sgbE	0	1	0	0	0	0	0	0	0	0	0	0
ECB_03545	0	1	0	0	0	0	0	0	0	0	0	0
ibpB	0	1	0	0	0	0	0	0	0	0	0	0
pstC	0	1	0	0	0	0	0	0	0	0	0	0
atpC	0	1	0	0	0	0	0	0	0	0	0	0
asnC	0	1	0	0	0	0	0	0	0	0	0	0
asnA	0	1	0	0	0	0	0	0	0	0	0	0
hdfR	0	1	0	0	0	0	0	0	0	0	0	0
wecF	0	1	0	0	0	0	0	0	0	0	0	0
fdoH	0	1	0	0	0	0	0	0	0	0	0	0
birA	0	1	0	0	0	0	0	0	0	0	0	0
pepE	0	1	0	0	0	0	0	0	0	0	0	0
xylE	0	1	0	0	0	0	0	0	0	0	0	0
malG	0	1	0	0	0	0	0	0	0	0	0	0
groES	0	1	0	0	0	0	0	0	0	0	0	0
nrdD	0	1	0	0	0	0	0	0	0	0	0	0
yjjV	0	1	0	0	0	0	0	0	0	0	0	0
lasT	0	1	0	0	0	0	0	0	0	0	0	0
thrB	0	0	1	0	0	0	0	0	0	0	0	0
fixC	0	0	1	0	0	0	0	0	0	0	0	0
nadC	0	0	1	0	0	0	0	0	0	0	0	0
fhuA	0	0	1	0	0	0	0	0	0	0	0	0
yaeP	0	0	1	0	0	0	0	0	0	0	0	0
pepD	0	0	1	0	0	0	0	0	0	0	0	0
yagS	0	0	1	0	0	0	0	0	0	0	0	0
insA-4	0	0	1	0	0	0	0	0	0	0	0	0
aroL	0	0	1	0	0	0	0	0	0	0	0	0
yaiA	0	0	1	0	0	0	0	0	0	0	0	0
yajB	0	0	1	0	0	0	0	0	0	0	0	0
nusB	0	0	1	0	0	0	0	0	0	0	0	0
ybaJ	0	0	1	0	0	0	0	0	0	0	0	0
dnaX	0	0	1	0	0	0	0	0	0	0	0	0
ybaS	0	0	1	0	0	0	0	0	0	0	0	0
cueR	0	0	1	0	0	0	0	0	0	0	0	0
ybbJ	0	0	1	0	0	0	0	0	0	0	0	0
tesA	0	0	1	0	0	0	0	0	0	0	0	0
ybcD	0	0	1	0	0	0	0	0	0	0	0	0
cusS	0	0	1	0	0	0	0	0	0	0	0	0
rna	0	0	1	0	0	0	0	0	0	0	0	0
[truncated: 950 more rows]
