# Supplementary material for: Genomic and phenotypic evolution of Escherichia coli in a novel citrate-only resource environment
Source: eLife. 2020 May 29;9:e55414. doi: 10.7554/eLife.55414 (PMC7299349; doi:10.7554/eLife.55414)
Supplement: Figure 12—source data 1. [file elife-55414-fig12-data1.csv]

Clone	IS_element	genome_start	genome_end	genes_promoter	genes_inactivated	Environment	Population	GeneName	GenePosition	Generation
ZDBp910	IS150	464051	464053	NA	priC	DM25	DM25-1	priC	coding (274-276/528 nt)	2500
ZDBp910	IS1	736640	736648	NA	NA	DM25	DM25-1	gltA/sdhC	intergenic (-360/-341)	2500
ZDBp910	IS150	1968587	1968589	yecA	NA	DM25	DM25-1	tyrP/yecA	intergenic (+14/+46)	2500
ZDBp910	IS150	2112669	2112671	NA	yehZ	DM25	DM25-1	yehZ	coding (16-18/918 nt)	2500
ZDBp910	IS186	2264348	2264355	NA	menC	DM25	DM25-1	menC	coding (129-136/963 nt)	2500
ZDBp910	IS186	2465970	2465978	NA	NA	DM25	DM25-1	hyfA	coding (584-592/618 nt)	2500
ZDBp910	IS150	2466822	2466825	NA	hyfB	DM25	DM25-1	hyfB	coding (819-822/2019 nt)	2500
ZDBp910	IS150	3109394	3109396	NA	yqjA	DM25	DM25-1	yqjA	coding (245-247/663 nt)	2500
ZDBp910	IS150	3172540	3172542	nlpI	NA	DM25	DM25-1	nlpI/pnp	intergenic (-39/+68)	2500
ZDBp910	IS150	3501576	3501578	yhiO	NA	DM25	DM25-1	yhiO/uspA	intergenic (-35/-354)	2500
ZDBp910	IS150	4123868	4123870	NA	NA	DM25	DM25-1	aceB	coding (1562-1564/1602 nt)	2500
ZDBp912	IS150	435258	435258	ppiD	NA	DM25	DM25-3	hupB/ppiD	intergenic (+33/-159)	2500
ZDBp912	IS150	492501	492503	NA	ybbO	DM25	DM25-3	ybbO	coding (264-266/810 nt)	2500
ZDBp912	IS3	544593	544595	NA	ybcL	DM25	DM25-3	ybcL	coding (362-364/552 nt)	2500
ZDBp912	IS150	1137051	1137053	NA	dinI	DM25	DM25-3	dinI	coding (28-30/246 nt)	2500
ZDBp912	IS186	2264346	2264353	NA	menC	DM25	DM25-3	menC	coding (131-138/963 nt)	2500
ZDBp912	IS186	2264348	2264355	NA	menC	DM25	DM25-3	menC	coding (129-136/963 nt)	2500
ZDBp912	IS150	2553002	2553004	NA	yfhG	DM25	DM25-3	yfhG	coding (560-562/714 nt)	2500
ZDBp912	IS150	2812156	2812158	NA	NA	DM25	DM25-3	ygeD	coding (1128-1130/1194 nt)	2500
ZDBp912	IS150	2896913	2896915	NA	ygfH	DM25	DM25-3	ygfH	coding (112-114/1479 nt)	2500
ZDBp912	IS150	2978663	2978665	NA	glcB	DM25	DM25-3	glcB	coding (376-378/2172 nt)	2500
ZDBp912	IS150	3466937	3466940	NA	yhhL	DM25	DM25-3	yhhL	coding (139-142/270 nt)	2500
ZDBp912	IS150	3501576	3501578	yhiO	NA	DM25	DM25-3	yhiO/uspA	intergenic (-35/-354)	2500
ZDBp913	IS150	300764	300766	NA	betA	DM25	DM25-4	betA	coding (577-579/1671 nt)	2500
ZDBp913	IS3	574297	574299	NA	cusS	DM25	DM25-4	cusS	coding (950-952/1449 nt)	2500
ZDBp913	IS150	1887034	1887036	yobG	NA	DM25	DM25-4	yobG/ECB_01797	intergenic (-3/-154)	2500
ZDBp913	IS150	1988168	1988170	NA	yeeJ	DM25	DM25-4	yeeJ	coding (5620-5622/7152 nt)	2500
ZDBp913	IS150	2099889	2099891	NA	yehM	DM25	DM25-4	yehM	coding (991-993/2280 nt)	2500
ZDBp913	IS3	2659020	2659022	NA	NA	DM25	DM25-4	csrA/alaS	intergenic (-212/+21)	2500
ZDBp913	IS150	2896927	2896929	NA	ygfH	DM25	DM25-4	ygfH	coding (126-128/1479 nt)	2500
ZDBp913	IS150	2976836	2976838	NA	NA	DM25	DM25-4	yghK/glcB	intergenic (-322/+31)	2500
ZDBp913	IS150	3109394	3109396	NA	yqjA	DM25	DM25-4	yqjA	coding (245-247/663 nt)	2500
ZDBp913	IS150	4122888	4122890	NA	aceB	DM25	DM25-4	aceB	coding (582-584/1602 nt)	2500
ZDBp921	IS150	464051	464053	NA	priC	DM25	DM25+6	priC	coding (274-276/528 nt)	2500
ZDBp921	IS150	1137052	1137054	NA	dinI	DM25	DM25+6	dinI	coding (27-29/246 nt)	2500
ZDBp921	IS150	2112669	2112671	NA	yehZ	DM25	DM25+6	yehZ	coding (16-18/918 nt)	2500
ZDBp921	IS150	3109394	3109396	NA	yqjA	DM25	DM25+6	yqjA	coding (245-247/663 nt)	2500
ZDBp921	IS150	4101561	4101563	NA	NA	DM25	DM25+6	thiC	coding (1532-1534/1896 nt)	2500
ZDBp921	IS150	4403966	4403968	NA	idnT	DM25	DM25+6	idnT	coding (613-615/1320 nt)	2500
ZDBp911	IS3	573826	573830	NA	NA	DM25	DM25-2	cusS	coding (1419-1423/1449 nt)	2500
ZDBp911	IS1	736587	736595	NA	NA	DM25	DM25-2	gltA/sdhC	intergenic (-307/-394)	2500
ZDBp911	IS1	2132618	2132626	NA	NA	DM25	DM25-2	mglB	coding (969-977/999 nt)	2500
ZDBp911	IS186	2264348	2264355	NA	menC	DM25	DM25-2	menC	coding (129-136/963 nt)	2500
ZDBp911	IS150	4123868	4123870	NA	NA	DM25	DM25-2	aceB	coding (1562-1564/1602 nt)	2500
ZDBp911	IS150	4456970	4456972	yjiX	NA	DM25	DM25-2	yjiX/yjiY	intergenic (-32/+16)	2500
ZDBp920	IS150	464051	464053	NA	priC	DM25	DM25+5	priC	coding (274-276/528 nt)	2500
ZDBp920	IS150	1137050	1137052	NA	dinI	DM25	DM25+5	dinI	coding (29-31/246 nt)	2500
ZDBp920	IS150	3109394	3109396	NA	yqjA	DM25	DM25+5	yqjA	coding (245-247/663 nt)	2500
ZDBp920	IS150	3501576	3501578	yhiO	NA	DM25	DM25+5	yhiO/uspA	intergenic (-35/-354)	2500
ZDBp917	IS150	3398568	3398570	feoA	NA	DM25	DM25+2	yhgF/feoA	intergenic (+395/-41)	2500
ZDBp917	IS150	4122957	4122960	NA	aceB	DM25	DM25+2	aceB	coding (651-654/1602 nt)	2500
ZDBp916	IS150	2133568	2133570	NA	mglB	DM25	DM25+1	mglB	coding (25-27/999 nt)	2500
ZDBp916	IS150	2694867	2694869	NA	fhlA	DM25	DM25+1	fhlA	coding (867-869/2079 nt)	2500
ZDBp916	IS150	3501576	3501578	yhiO	NA	DM25	DM25+1	yhiO/uspA	intergenic (-35/-354)	2500
ZDBp916	IS1	4123908	4123916	NA	NA	DM25	DM25+1	[aceB]	NA	2500
ZDBp916	IS150	4191234	4191236	NA	NA	DM25	DM25+1	yjcH	coding (295-297/315 nt)	2500
ZDBp914	IS3	544481	544485	NA	ybcL	DM25	DM25-5	ybcL	coding (250-254/552 nt)	2500
ZDBp914	IS1	736642	736648	NA	NA	DM25	DM25-5	gltA/sdhC	intergenic (-362/-341)	2500
ZDBp914	IS150	2132724	2132726	NA	NA	DM25	DM25-5	mglB	coding (869-871/999 nt)	2500
ZDBp914	IS150	2694135	2694137	NA	fhlA	DM25	DM25-5	fhlA	coding (135-137/2079 nt)	2500
ZDBp915	IS150	319673	319675	NA	yahM	DM25	DM25-6	yahM	coding (174-176/246 nt)	2500
ZDBp915	IS150	600001	600003	NA	NA	DM25	DM25-6	entF	coding (3562-3564/3882 nt)	2500
ZDBp915	IS1	734998	735006	NA	NA	DM25	DM25-6	gltA	coding (1275-1283/1284 nt)	2500
ZDBp915	IS150	1107553	1107555	NA	NA	DM25	DM25-6	ycdS	coding (2041-2043/2424 nt)	2500
ZDBp915	IS150	1173387	1173389	ptsG	NA	DM25	DM25-6	ycfH/ptsG	intergenic (+223/-70)	2500
ZDBp915	IS186	2264348	2264355	NA	menC	DM25	DM25-6	menC	coding (129-136/963 nt)	2500
ZDBp915	IS150	2820985	2820987	NA	araE	DM25	DM25-6	araE	coding (620-622/1419 nt)	2500
ZDBp915	IS150	3109394	3109397	NA	yqjA	DM25	DM25-6	yqjA	coding (245-248/663 nt)	2500
ZDBp915	IS150	3857836	3857838	wecB	NA	DM25	DM25-6	wzzE/wecB	intergenic (+21/-33)	2500
ZDBp915	IS150	3993788	3993790	NA	frvR	DM25	DM25-6	frvR	coding (151-153/1749 nt)	2500
ZDBp915	IS150	4478024	4478026	NA	mdoB	DM25	DM25-6	mdoB	coding (534-536/2292 nt)	2500
ZDBp919	IS186	2264346	2264353	NA	menC	DM25	DM25+4	menC	coding (131-138/963 nt)	2500
ZDBp919	IS3	2659020	2659022	NA	NA	DM25	DM25+4	csrA/alaS	intergenic (-212/+21)	2500
ZDBp919	IS150	4456970	4456971	yjiX	NA	DM25	DM25+4	yjiX/yjiY	intergenic (-32/+17)	2500
ZDBp918	IS150	432359	432362	insL-2	NA	DM25	DM25+3	insL-2/lon	intergenic (-126/-27)	2500
ZDBp918	IS150	464051	464053	NA	priC	DM25	DM25+3	priC	coding (274-276/528 nt)	2500
ZDBp918	IS150	1173387	1173389	ptsG	NA	DM25	DM25+3	ycfH/ptsG	intergenic (+223/-70)	2500
ZDBp918	IS1	4122222	4122230	aceB	NA	DM25	DM25+3	metA/aceB	intergenic (+184/-77)	2500
ZDBp918	IS150	4201689	4201691	NA	gltP	DM25	DM25+3	gltP	coding (892-894/1314 nt)	2500
ZDBp883	IS150	247779	247781	NA	fadE	DM0	DM0-5	fadE	coding (1540-1542/2445 nt)	2500
ZDBp883	IS150	579159	579161	NA	NA	DM0	DM0-5	cusB	coding (1203-1205/1224 nt)	2500
ZDBp883	IS1	1567292	1567300	ydeP	NA	DM0	DM0-5	ydeP/ydeQ	intergenic (-61/+265)	2500
ZDBp883	IS150	2099889	2099891	NA	yehM	DM0	DM0-5	yehM	coding (991-993/2280 nt)	2500
ZDBp883	IS150	2348064	2348066	NA	NA	DM0	DM0-5	fadL	coding (1092-1094/1347 nt)	2500
ZDBp883	IS150	3109394	3109397	NA	yqjA	DM0	DM0-5	yqjA	coding (245-248/663 nt)	2500
ZDBp883	IS150	3501576	3501578	yhiO	NA	DM0	DM0-5	yhiO/uspA	intergenic (-35/-354)	2500
ZDBp883	IS186	3687738	3687746	NA	yicC	DM0	DM0-5	yicC	coding (306-314/864 nt)	2500
ZDBp883	IS150	4456967	4456969	yjiX	NA	DM0	DM0-5	yjiX/yjiY	intergenic (-29/+19)	2500
ZDBp880	IS150	1236016	1236018	nhaB	NA	DM0	DM0-4	nhaB/fadR	intergenic (-128/-91)	2500
ZDBp880	IS3	1536594	1536597	NA	rpsV	DM0	DM0-4	rpsV	coding (99-102/138 nt)	2500
ZDBp880	IS150	2133567	2133570	NA	mglB	DM0	DM0-4	mglB	coding (25-28/999 nt)	2500
ZDBp880	IS150	2325035	2325037	NA	yfcJ	DM0	DM0-4	yfcJ	coding (685-687/1179 nt)	2500
ZDBp880	IS150	3501576	3501578	yhiO	NA	DM0	DM0-4	yhiO/uspA	intergenic (-35/-354)	2500
ZDBp880	IS150	3975518	3975520	NA	yihS	DM0	DM0-4	yihS	coding (322-324/1242 nt)	2500
ZDBp877	IS3	557465	557467	NA	ECB_00515	DM0	DM0-3	ECB_00515	coding (542-544/705 nt)	2500
ZDBp877	IS150	1137052	1137054	NA	dinI	DM0	DM0-3	dinI	coding (27-29/246 nt)	2500
ZDBp877	IS150	1307420	1307422	NA	cls	DM0	DM0-3	cls	coding (751-753/1461 nt)	2500
ZDBp877	IS1	1887041	1887049	yobG	NA	DM0	DM0-3	yobG/ECB_01797	intergenic (-10/-141)	2500
ZDBp877	IS150	1988179	1988181	NA	yeeJ	DM0	DM0-3	yeeJ	coding (5631-5633/7152 nt)	2500
ZDBp877	IS150	2348048	2348050	NA	fadL	DM0	DM0-3	fadL	coding (1076-1078/1347 nt)	2500
ZDBp877	IS186	2465970	2465977	NA	NA	DM0	DM0-3	hyfA	coding (584-591/618 nt)	2500
ZDBp877	IS150	2914014	2914016	NA	yggG	DM0	DM0-3	yggG	coding (102-104/759 nt)	2500
ZDBp877	IS150	3172540	3172542	nlpI	NA	DM0	DM0-3	nlpI/pnp	intergenic (-39/+68)	2500
ZDBp877	IS150	3501576	3501578	yhiO	NA	DM0	DM0-3	yhiO/uspA	intergenic (-35/-354)	2500
ZDBp877	IS1	3700202	3700209	gltS	NA	DM0	DM0-3	gltS/yicE	intergenic (-94/-179)	2500
ZDBp877	IS150	3748889	3748891	NA	yidI	DM0	DM0-3	yidI	coding (142-144/450 nt)	2500
ZDBp875	IS150	574068	574070	NA	NA	DM0	DM0-2	cusS	coding (1179-1181/1449 nt)	2500
ZDBp875	IS150	923149	923151	NA	ybjR	DM0	DM0-2	ybjR	coding (509-511/831 nt)	2500
ZDBp875	IS150	1236018	1236019	nhaB	NA	DM0	DM0-2	nhaB/fadR	intergenic (-130/-90)	2500
ZDBp875	IS3	1294964	1294967	NA	NA	DM0	DM0-2	hns/tdk	intergenic (-315/-286)	2500
ZDBp875	IS150	1640803	1640805	NA	NA	DM0	DM0-2	ynfH	coding (761-763/855 nt)	2500
ZDBp875	IS150	1887034	1887036	yobG	NA	DM0	DM0-2	yobG/ECB_01797	intergenic (-3/-154)	2500
ZDBp875	IS150	1902189	1902191	NA	yebZ	DM0	DM0-2	yebZ	coding (664-666/873 nt)	2500
ZDBp875	IS150	2347259	2347261	NA	fadL	DM0	DM0-2	fadL	coding (287-289/1347 nt)	2500
ZDBp875	IS150	3501576	3501578	yhiO	NA	DM0	DM0-2	yhiO/uspA	intergenic (-35/-354)	2500
ZDBp875	IS150	3975518	3975520	NA	yihS	DM0	DM0-2	yihS	coding (322-324/1242 nt)	2500
ZDBp875	IS150	4260612	4260614	NA	lysU	DM0	DM0-2	lysU	coding (208-210/1518 nt)	2500
ZDBp901	IS150	464051	464053	NA	priC	DM0	DM0+5	priC	coding (274-276/528 nt)	2500
ZDBp901	IS150	681779	681781	NA	asnB	DM0	DM0+5	asnB	coding (513-515/1665 nt)	2500
ZDBp901	IS150	923167	923169	NA	ybjR	DM0	DM0+5	ybjR	coding (527-529/831 nt)	2500
ZDBp901	IS150	3109394	3109397	NA	yqjA	DM0	DM0+5	yqjA	coding (245-248/663 nt)	2500
ZDBp901	IS150	3501352	3501354	NA	yhiO	DM0	DM0+5	yhiO	coding (188-190/336 nt)	2500
ZDBp901	IS150	4122754	4122756	NA	aceB	DM0	DM0+5	aceB	coding (448-450/1602 nt)	2500
ZDBp901	IS150	4478024	4478026	NA	mdoB	DM0	DM0+5	mdoB	coding (534-536/2292 nt)	2500
ZDBp898	IS150	140966	140969	NA	yacC	DM0	DM0+4	yacC	coding (198-201/348 nt)	2500
ZDBp898	IS150	468912	468914	NA	htpG	DM0	DM0+4	htpG	coding (279-281/1875 nt)	2500
ZDBp898	IS150	1097283	1097285	NA	putP	DM0	DM0+4	putP	coding (674-676/1509 nt)	2500
ZDBp898	IS150	1306894	1306896	NA	NA	DM0	DM0+4	cls	coding (1277-1279/1461 nt)	2500
ZDBp898	IS1	1887084	1887092	yobG	NA	DM0	DM0+4	yobG/ECB_01797	intergenic (-53/-98)	2500
ZDBp898	IS150	1913929	1913931	NA	zwf	DM0	DM0+4	zwf	coding (647-649/1476 nt)	2500
ZDBp898	IS150	3393071	3393073	NA	NA	DM0	DM0+4	envZ	coding (1263-1265/1353 nt)	2500
ZDBp898	IS150	4191720	4191723	NA	NA	DM0	DM0+4	yjcH/acs	intergenic (-190/+7)	2500
ZDBp898	IS150	4203100	4203102	NA	yjcO	DM0	DM0+4	yjcO	coding (230-232/690 nt)	2500
ZDBp898	IS150	4478040	4478042	NA	mdoB	DM0	DM0+4	mdoB	coding (518-520/2292 nt)	2500
ZDBp892	IS150	464051	464053	NA	priC	DM0	DM0+2	priC	coding (274-276/528 nt)	2500
ZDBp892	IS150	574068	574070	NA	NA	DM0	DM0+2	cusS	coding (1179-1181/1449 nt)	2500
ZDBp892	ISRSO11	2331208	2331211	NA	NA	DM0	DM0+2	mepA	coding (775-778/825 nt)	2500
ZDBp892	IS150	3109394	3109396	NA	yqjA	DM0	DM0+2	yqjA	coding (245-247/663 nt)	2500
ZDBp892	IS150	3172540	3172542	nlpI	NA	DM0	DM0+2	nlpI/pnp	intergenic (-39/+68)	2500
ZDBp892	IS150	3501576	3501578	yhiO	NA	DM0	DM0+2	yhiO/uspA	intergenic (-35/-354)	2500
ZDBp892	IS150	4478040	4478042	NA	mdoB	DM0	DM0+2	mdoB	coding (518-520/2292 nt)	2500
ZDBp889	IS150	435255	435257	ppiD	NA	DM0	DM0+1	hupB/ppiD	intergenic (+30/-160)	2500
ZDBp889	IS150	1039280	1039282	NA	yccR	DM0	DM0+1	yccR	coding (31-33/630 nt)	2500
ZDBp889	IS150	1064767	1064769	NA	ymcA	DM0	DM0+1	ymcA	coding (1289-1291/2097 nt)	2500
ZDBp889	IS150	1154915	1154917	NA	flgK	DM0	DM0+1	flgK	coding (948-950/1644 nt)	2500
ZDBp889	IS150	1236016	1236018	nhaB	NA	DM0	DM0+1	nhaB/fadR	intergenic (-128/-91)	2500
ZDBp889	IS150	1619073	1619075	hokD	NA	DM0	DM0+1	hokD/ECB_01533	intergenic (-71/+139)	2500
ZDBp889	IS1	1887041	1887049	yobG	NA	DM0	DM0+1	yobG/ECB_01797	intergenic (-10/-141)	2500
ZDBp889	IS150	2348272	2348274	NA	NA	DM0	DM0+1	fadL	coding (1300-1302/1347 nt)	2500
ZDBp889	IS3	2623300	2623302	NA	NA	DM0	DM0+1	ECB_02509	coding (1081-1083/1230 nt)	2500
ZDBp889	IS150	2938642	2938644	NA	NA	DM0	DM0+1	nupG	coding (1019-1021/1257 nt)	2500
ZDBp889	IS150	3501577	3501578	yhiO	NA	DM0	DM0+1	yhiO/uspA	intergenic (-36/-354)	2500
ZDBp889	IS150	3538891	3538893	NA	yhjG	DM0	DM0+1	yhjG	coding (97-99/2076 nt)	2500
ZDBp886	IS150	1619073	1619075	hokD	NA	DM0	DM0-6	hokD/ECB_01533	intergenic (-71/+139)	2500
ZDBp886	IS150	1651192	1651194	NA	NA	DM0	DM0-6	ydgG	coding (846-848/1035 nt)	2500
ZDBp886	IS150	2079174	2079176	NA	yegX	DM0	DM0-6	yegX	coding (613-615/819 nt)	2500
ZDBp886	IS150	2348272	2348274	NA	NA	DM0	DM0-6	fadL	coding (1300-1302/1347 nt)	2500
ZDBp886	IS150	2957887	2957889	ECB_02812	NA	DM0	DM0-6	ECB_02812/ECB_02813	intergenic (-78/-494)	2500
ZDBp886	IS150	3109394	3109396	NA	yqjA	DM0	DM0-6	yqjA	coding (245-247/663 nt)	2500
ZDBp886	IS150	3501576	3501578	yhiO	NA	DM0	DM0-6	yhiO/uspA	intergenic (-35/-354)	2500
ZDBp886	IS150	3764589	3764591	dgoT	NA	DM0	DM0-6	dgoT/dgoD	intergenic (-97/+21)	2500
ZDBp886	IS150	4234238	4234240	NA	yjdA	DM0	DM0-6	yjdA	coding (1006-1008/2229 nt)	2500
ZDBp904	IS150	237985	237987	NA	mltD	DM0	DM0+6	mltD	coding (339-341/1359 nt)	2500
ZDBp904	IS1	734968	734976	NA	NA	DM0	DM0+6	ybgD/gltA	intergenic (-361/+21)	2500
ZDBp904	IS150	969347	969349	NA	NA	DM0	DM0+6	pflA/pflB	intergenic (-153/+37)	2500
ZDBp904	IS150	1821169	1821171	NA	ynjI	DM0	DM0+6	ynjI	coding (616-618/1041 nt)	2500
ZDBp904	IS150	1896278	1896281	NA	yebT	DM0	DM0+6	yebT	coding (505-508/2634 nt)	2500
ZDBp904	IS150	2133582	2133584	NA	mglB	DM0	DM0+6	mglB	coding (11-13/999 nt)	2500
ZDBp904	IS150	2230905	2230907	NA	yfaL	DM0	DM0+6	yfaL	coding (1971-1973/3753 nt)	2500
ZDBp904	IS150	3501576	3501578	yhiO	NA	DM0	DM0+6	yhiO/uspA	intergenic (-35/-354)	2500
ZDBp871	IS150	199024	199026	uppS	NA	DM0	DM0-1	ispC/uppS	intergenic (+19/-165)	2500
ZDBp871	ISRSO11	599136	599138	NA	entF	DM0	DM0-1	entF	coding (2697-2699/3882 nt)	2500
ZDBp871	IS150	1134456	1134458	NA	yceJ	DM0	DM0-1	yceJ	coding (179-181/567 nt)	2500
ZDBp871	IS150	1154915	1154917	NA	flgK	DM0	DM0-1	flgK	coding (948-950/1644 nt)	2500
ZDBp871	IS150	1651190	1651192	NA	NA	DM0	DM0-1	ydgG	coding (844-846/1035 nt)	2500
ZDBp871	IS150	1897614	1897616	NA	yebT	DM0	DM0-1	yebT	coding (1841-1843/2634 nt)	2500
ZDBp871	IS3	2348062	2348064	NA	NA	DM0	DM0-1	fadL	coding (1090-1092/1347 nt)	2500
ZDBp871	IS150	2535008	2535008	NA	hcaC	DM0	DM0-1	hcaC	coding (44/321 nt)	2500
ZDBp871	IS1	2897655	2897662	NA	ygfH	DM0	DM0-1	ygfH	coding (854-861/1479 nt)	2500
ZDBp871	IS150	3402005	3402005	NA	yhgA	DM0	DM0-1	yhgA	coding (391/879 nt)	2500
ZDBp871	IS150	3501576	3501578	yhiO	NA	DM0	DM0-1	yhiO/uspA	intergenic (-35/-354)	2500
ZDBp871	IS150	3561766	3561768	ldrD	NA	DM0	DM0-1	ldrD/yhjV	intergenic (-89/-385)	2500
ZDBp871	IS1	3756769	3756776	NA	yidP	DM0	DM0-1	yidP	pseudogene (30-37/210 nt)	2500
ZDBp871	IS150	3932217	3932219	NA	fadA	DM0	DM0-1	fadA	coding (865-867/1164 nt)	2500
ZDBp871	IS150	3975518	3975520	NA	yihS	DM0	DM0-1	yihS	coding (322-324/1242 nt)	2500
ZDBp871	IS150	4260611	4260614	NA	lysU	DM0	DM0-1	lysU	coding (208-211/1518 nt)	2500
ZDBp871	IS150	4456970	4456972	yjiX	NA	DM0	DM0-1	yjiX/yjiY	intergenic (-32/+16)	2500
ZDBp895	IS150	248532	248535	NA	fadE	DM0	DM0+3	fadE	coding (786-789/2445 nt)	2500
ZDBp895	IS3	891825	891827	NA	NA	DM0	DM0+3	ECB_00830	coding (913-915/924 nt)	2500
ZDBp895	IS150	1528089	1528092	yddG	NA	DM0	DM0+3	yddG/fdnG	intergenic (-33/-253)	2500
ZDBp895	IS3	1536758	1536760	rpsV	NA	DM0	DM0+3	rpsV/bdm	intergenic (-63/+37)	2500
ZDBp895	IS150	1595625	1595627	NA	eamA	DM0	DM0+3	eamA	coding (71-73/900 nt)	2500
ZDBp895	IS150	1651206	1651208	NA	NA	DM0	DM0+3	ydgG	coding (860-862/1035 nt)	2500
ZDBp895	IS1	1802927	1802935	NA	NA	DM0	DM0+3	astE	coding (941-949/969 nt)	2500
ZDBp895	IS150	1867822	1867824	NA	fadD	DM0	DM0+3	fadD	coding (188-190/1686 nt)	2500
ZDBp895	IS150	2133554	2133556	NA	mglB	DM0	DM0+3	mglB	coding (39-41/999 nt)	2500
ZDBp895	IS3	3110349	3110351	NA	yqjC	DM0	DM0+3	yqjC	coding (4-6/369 nt)	2500
ZDBp895	IS150	3501576	3501578	yhiO	NA	DM0	DM0+3	yhiO/uspA	intergenic (-35/-354)	2500
ZDBp895	IS150	3536960	3536962	NA	NA	DM0	DM0+3	yhjG	coding (2028-2030/2076 nt)	2500
ZDBp895	IS150	3888290	3888292	NA	ECB_03690	DM0	DM0+3	ECB_03690	coding (586-588/903 nt)	2500
ZDBp895	IS150	4364778	4364781	NA	ytfT	DM0	DM0+3	ytfT	coding (127-130/1023 nt)	2500
ZDBp895	IS150	4446620	4446622	yjhS	NA	DM0	DM0+3	yjhS/yjhT	intergenic (-60/+3)	2500
