# Supplementary material for: Genomic and phenotypic evolution of Escherichia coli in a novel citrate-only resource environment
Source: eLife. 2020 May 29;9:e55414. doi: 10.7554/eLife.55414 (PMC7299349; doi:10.7554/eLife.55414)
Supplement: Figure 12—source data 2. [file elife-55414-fig12-data2.csv]

Clone	IS_element	Position	Environment	Population	GeneName	GenePosition	Generation
ZDB477	IS150	16990	LTEE	Ara-3	mokC/nhaA	intergenic (-32/-496)	25000
ZDB477	IS150	1162790	LTEE	Ara-3	plsX	coding (601-603/1071 nt)	25000
ZDB477	IS150	1270660	LTEE	Ara-3	ldrC/chaA	intergenic (-167/+235)	25000
ZDB477	IS150	1462320	LTEE	Ara-3	mokB/trg	intergenic (-82/-257)	25000
ZDB477	IS150	1821482	LTEE	Ara-3	ynjI	coding (616-618/1041 nt)	25000
ZDB477	IS150	3015771	LTEE	Ara-3	ECB_02816	coding (1192-1194/1677 nt)	25000
ZDB477	IS150	3454491	LTEE	Ara-3	yrfE	coding (342-343/561 nt)	25000
ZDB477	IS150	4110237	LTEE	Ara-3	metL	coding (296-298/2433 nt)	25000
ZDB477	IS150	4613020	LTEE	Ara-3	smp/serB	intergenic (-17/-87)	25000
772A	IS150	3466896	LTEE	Ara+5	yhgF	coding (825-827/2319 nt)	500
10947	IS150	17045	LTEE	Ara-5	mokC/nhaA	intergenic (-87/-441)	40000
10947	IS150	641158	LTEE	Ara-5	ybeM	coding (546-549/789 nt)	40000
10947	IS150	835448	LTEE	Ara-5	ybiN	coding (492-494/927 nt)	40000
10947	IS150	970687	LTEE	Ara-5	pflB/focA	intergenic (-40/+13)	40000
10947	IS150	1101970	LTEE	Ara-5	phoH	coding (694-696/1065 nt)	40000
10947	IS150	1462251	LTEE	Ara-5	mokB/trg	intergenic (-13/-326)	40000
10947	IS150	2283472	LTEE	Ara-5	yfaA/gyrA	intergenic (-128/+19)	40000
10947	IS150	3036431	LTEE	Ara-5	ECB_02837	coding (502-504/1494 nt)	40000
10947	IS150	4252526	LTEE	Ara-5	uvrA	coding (276-278/2823 nt)	40000
10947	IS150	4567086	LTEE	Ara-5	yjiX/yjiY	intergenic (-32/+16)	40000
1064B	IS150	3895402	LTEE	Ara+3	rbsD	coding (245-247/420 nt)	1500
4531A	IS150	2899615	LTEE	Ara+2	yqeB	coding (378-380/1626 nt)	10000
8593B	IS150	16972	LTEE	Ara-1	mokC/nhaA	intergenic (-14/-514)	20000
8593B	IS150	241691	LTEE	Ara-1	insB-2	coding (186-188/504 nt)	20000
8593B	IS150	1270660	LTEE	Ara-1	ldrC/chaA	intergenic (-167/+235)	20000
8593B	IS150	1733647	LTEE	Ara-1	pykF	coding (683-685/1413 nt)	20000
8593B	IS150	1821525	LTEE	Ara-1	ynjI	coding (573-575/1041 nt)	20000
8593B	IS150	3015771	LTEE	Ara-1	ECB_02816	coding (1192-1195/1677 nt)	20000
4535A	IS150	1462251	LTEE	Ara+6	mokB/trg	intergenic (-13/-326)	10000
8597B	IS150	16972	LTEE	Ara-5	mokC/nhaA	intergenic (-14/-514)	20000
8597B	IS150	641158	LTEE	Ara-5	ybeM	coding (546-549/789 nt)	20000
8597B	IS150	970687	LTEE	Ara-5	pflB/focA	intergenic (-40/+13)	20000
8597B	IS150	1416510	LTEE	Ara-5	ydaG	coding (115-117/135 nt)	20000
8597B	IS150	1462251	LTEE	Ara-5	mokB/trg	intergenic (-13/-326)	20000
8597B	IS150	1619926	LTEE	Ara-5	hokD/ECB_01533	intergenic (-163/+46)	20000
8597B	IS150	2283472	LTEE	Ara-5	yfaA/gyrA	intergenic (-128/+19)	20000
8597B	IS150	4252526	LTEE	Ara-5	uvrA	coding (276-278/2823 nt)	20000
8597B	IS150	4567086	LTEE	Ara-5	yjiX/yjiY	intergenic (-32/+16)	20000
10407	IS150	2899615	LTEE	Ara+2	yqeB	coding (378-380/1626 nt)	30000
11832	IS150	2869830	LTEE	Ara-2	aas	coding (803-805/2160 nt)	30000
11832	IS150	2899617	LTEE	Ara-2	yqeB	coding (376-378/1626 nt)	30000
11339	IS150	17045	LTEE	Ara-5	mokC/nhaA	intergenic (-87/-441)	50000
11339	IS150	641158	LTEE	Ara-5	ybeM	coding (546-549/789 nt)	50000
11339	IS150	835448	LTEE	Ara-5	ybiN	coding (492-494/927 nt)	50000
11339	IS150	970687	LTEE	Ara-5	pflB/focA	intergenic (-40/+13)	50000
11339	IS150	1101970	LTEE	Ara-5	phoH	coding (694-696/1065 nt)	50000
11339	IS150	1462251	LTEE	Ara-5	mokB/trg	intergenic (-13/-326)	50000
11339	IS150	1757644	LTEE	Ara-5	ydiQ	coding (760-762/765 nt)	50000
11339	IS150	2283472	LTEE	Ara-5	yfaA/gyrA	intergenic (-128/+19)	50000
11339	IS150	2389199	LTEE	Ara-5	mepA	coding (775-778/825 nt)	50000
11339	IS150	2525337	LTEE	Ara-5	hyfC	pseudogene (436-438/720 nt)	50000
11339	IS150	2877356	LTEE	Ara-5	kduD	coding (521-524/762 nt)	50000
11339	IS150	3036431	LTEE	Ara-5	ECB_02837	coding (502-504/1494 nt)	50000
11339	IS150	4252526	LTEE	Ara-5	uvrA	coding (276-278/2823 nt)	50000
11339	IS150	4567086	LTEE	Ara-5	yjiX/yjiY	intergenic (-32/+16)	50000
ZDB445	IS150	16990	LTEE	Ara-3	mokC/nhaA	intergenic (-32/-496)	15000
ZDB445	IS150	1270660	LTEE	Ara-3	ldrC/chaA	intergenic (-167/+235)	15000
ZDB445	IS150	1462320	LTEE	Ara-3	mokB/trg	intergenic (-82/-257)	15000
ZDB445	IS150	2122426	LTEE	Ara-3	ECB_02013	coding (198-200/216 nt)	15000
ZDB445	IS150	3015771	LTEE	Ara-3	ECB_02816	coding (1192-1194/1677 nt)	15000
ZDB445	IS150	3268052	LTEE	Ara-3	yhbE/rpmA	intergenic (-83/+42)	15000
ZDB445	IS150	4110237	LTEE	Ara-3	metL	coding (296-298/2433 nt)	15000
ZDB445	IS150	4613020	LTEE	Ara-3	smp/serB	intergenic (-17/-87)	15000
ZDB107	IS150	16990	LTEE	Ara-3	mokC/nhaA	intergenic (-32/-496)	38000
ZDB107	IS150	643362	LTEE	Ara-3	ybeF	coding (598-600/954 nt)	38000
ZDB107	IS150	1153894	LTEE	Ara-3	flgK	coding (948-950/1644 nt)	38000
ZDB107	IS150	1270660	LTEE	Ara-3	ldrC/chaA	intergenic (-167/+235)	38000
ZDB107	IS150	1451972	LTEE	Ara-3	acpD	coding (218-220/606 nt)	38000
ZDB107	IS150	1462320	LTEE	Ara-3	mokB/trg	intergenic (-82/-257)	38000
ZDB107	IS150	1729051	LTEE	Ara-3	ydhV	coding (2044-2047/2103 nt)	38000
ZDB107	IS150	1776434	LTEE	Ara-3	pheS/pheM	intergenic (-225/+56)	38000
ZDB107	IS150	2122426	LTEE	Ara-3	ECB_02013	coding (198-200/216 nt)	38000
ZDB107	IS150	2655781	LTEE	Ara-3	yfiH	coding (660-662/732 nt)	38000
ZDB107	IS150	2877313	LTEE	Ara-3	kduD	coding (565-567/762 nt)	38000
ZDB107	IS150	2899615	LTEE	Ara-3	yqeB	coding (378-380/1626 nt)	38000
ZDB107	IS150	3015771	LTEE	Ara-3	ECB_02816	coding (1192-1194/1677 nt)	38000
ZDB107	IS150	3192744	LTEE	Ara-3	tdcG/tdcF	intergenic (-61/+8)	38000
ZDB107	IS150	3268052	LTEE	Ara-3	yhbE/rpmA	intergenic (-83/+42)	38000
ZDB107	IS150	3680780	LTEE	Ara-3	sgbE	coding (239-241/696 nt)	38000
ZDB107	IS150	3697154	LTEE	Ara-3	rhsA	coding (278-280/4134 nt)	38000
ZDB107	IS150	4110237	LTEE	Ara-3	metL	coding (296-298/2433 nt)	38000
ZDB107	IS150	4289282	LTEE	Ara-3	alsA	coding (519-521/1533 nt)	38000
ZDB107	IS150	4415710	LTEE	Ara-3	cycA	coding (848-850/1413 nt)	38000
ZDB107	IS150	4588156	LTEE	Ara-3	mdoB	coding (518-520/2292 nt)	38000
ZDB107	IS150	4613020	LTEE	Ara-3	smp/serB	intergenic (-17/-87)	38000
7179B	IS150	16990	LTEE	Ara-3	mokC/nhaA	intergenic (-32/-496)	15000
7179B	IS150	1270660	LTEE	Ara-3	ldrC/chaA	intergenic (-167/+235)	15000
7179B	IS150	1462320	LTEE	Ara-3	mokB/trg	intergenic (-82/-257)	15000
7179B	IS150	2122426	LTEE	Ara-3	ECB_02013	coding (198-200/216 nt)	15000
7179B	IS150	3015771	LTEE	Ara-3	ECB_02816	coding (1192-1194/1677 nt)	15000
7179B	IS150	3268052	LTEE	Ara-3	yhbE/rpmA	intergenic (-83/+42)	15000
7179B	IS150	4006278	LTEE	Ara-3	fadA	coding (868/1164 nt)	15000
7179B	IS150	4110237	LTEE	Ara-3	metL	coding (296-298/2433 nt)	15000
7179B	IS150	4613020	LTEE	Ara-3	smp/serB	intergenic (-17/-87)	15000
10448	IS150	16972	LTEE	Ara-6	mokC/nhaA	intergenic (-14/-514)	30000
10448	IS150	146998	LTEE	Ara-6	yadH	coding (494-496/771 nt)	30000
10448	IS150	1270660	LTEE	Ara-6	ldrC/chaA	intergenic (-167/+235)	30000
10448	IS150	2570965	LTEE	Ara-6	yfhM	coding (2140-2142/4962 nt)	30000
10448	IS150	3015771	LTEE	Ara-6	ECB_02816	coding (1192-1194/1677 nt)	30000
10448	IS150	3143448	LTEE	Ara-6	ygjD/rpsU	intergenic (-88/-148)	30000
7183B	IS150	16973	LTEE	Ara+1	mokC/nhaA	intergenic (-15/-514)	15000
7183B	IS150	118842	LTEE	Ara+1	hofB	coding (1060-1062/1386 nt)	15000
7183B	IS150	490481	LTEE	Ara+1	ybbN/ybbO	intergenic (-34/+25)	15000
7183B	IS150	589936	LTEE	Ara+1	insB-7	coding (135-138/504 nt)	15000
7183B	IS150	651703	LTEE	Ara+1	ybeB/phpB	intergenic (-83/+174)	15000
7183B	IS150	1102032	LTEE	Ara+1	phoH	coding (756-758/1065 nt)	15000
7183B	IS150	1270660	LTEE	Ara+1	ldrC/chaA	intergenic (-167/+235)	15000
7183B	IS150	1462266	LTEE	Ara+1	mokB/trg	intergenic (-28/-311)	15000
7183B	IS150	1619834	LTEE	Ara+1	hokD/ECB_01533	intergenic (-71/+139)	15000
7183B	IS150	2093029	LTEE	Ara+1	yegO	coding (1536/3078 nt)	15000
7183B	IS150	2397543	LTEE	Ara+1	yfcTU	coding (1121-1123/2646 nt)	15000
7183B	IS150	2877313	LTEE	Ara+1	kduD	coding (565-567/762 nt)	15000
7183B	IS150	3008938	LTEE	Ara+1	yeeU	coding (795/1062 nt)	15000
7183B	IS150	3697154	LTEE	Ara+1	rhsA	coding (278-280/4134 nt)	15000
7183B	IS150	4275713	LTEE	Ara+1	yjcO	coding (233-235/690 nt)	15000
7183B	IS150	4415710	LTEE	Ara+1	cycA	coding (848-850/1413 nt)	15000
7183B	IS150	4615673	LTEE	Ara+1	nadR	coding (145-148/1233 nt)	15000
8601A	IS150	2899615	LTEE	Ara+2	yqeB	coding (378-380/1626 nt)	20000
ZDB18	IS150	16990	LTEE	Ara-3	mokC/nhaA	intergenic (-32/-496)	30000
ZDB18	IS150	643362	LTEE	Ara-3	ybeF	coding (598-600/954 nt)	30000
ZDB18	IS150	1270660	LTEE	Ara-3	ldrC/chaA	intergenic (-167/+235)	30000
ZDB18	IS150	1451972	LTEE	Ara-3	acpD	coding (218-220/606 nt)	30000
ZDB18	IS150	1462320	LTEE	Ara-3	mokB/trg	intergenic (-82/-257)	30000
ZDB18	IS150	1729051	LTEE	Ara-3	ydhV	coding (2044-2047/2103 nt)	30000
ZDB18	IS150	1776434	LTEE	Ara-3	pheS/pheM	intergenic (-225/+56)	30000
ZDB18	IS150	2122426	LTEE	Ara-3	ECB_02013	coding (198-200/216 nt)	30000
ZDB18	IS150	2655781	LTEE	Ara-3	yfiH	coding (660-662/732 nt)	30000
ZDB18	IS150	2899615	LTEE	Ara-3	yqeB	coding (378-380/1626 nt)	30000
ZDB18	IS150	3015771	LTEE	Ara-3	ECB_02816	coding (1192-1194/1677 nt)	30000
ZDB18	IS150	3268052	LTEE	Ara-3	yhbE/rpmA	intergenic (-83/+42)	30000
ZDB18	IS150	3697154	LTEE	Ara-3	rhsA	coding (278-280/4134 nt)	30000
ZDB18	IS150	4110237	LTEE	Ara-3	metL	coding (296-298/2433 nt)	30000
ZDB18	IS150	4415710	LTEE	Ara-3	cycA	coding (848-850/1413 nt)	30000
ZDB18	IS150	4613020	LTEE	Ara-3	smp/serB	intergenic (-17/-87)	30000
7187B	IS150	17045	LTEE	Ara+5	mokC/nhaA	intergenic (-87/-441)	15000
7187B	IS150	1270660	LTEE	Ara+5	ldrC/chaA	intergenic (-167/+235)	15000
7187B	IS150	2734828	LTEE	Ara+5	ascF	coding (445-446/1458 nt)	15000
7187B	IS150	3080114	LTEE	Ara+5	hybO	pseudogene (119-121/1005 nt)	15000
7187B	IS150	3270443	LTEE	Ara+5	nlp/murA	intergenic (+21/+24)	15000
7187B	IS150	3542568	LTEE	Ara+5	yhhT	coding (16-17/1050 nt)	15000
8605A	IS150	1462251	LTEE	Ara+6	mokB/trg	intergenic (-13/-326)	20000
8605A	IS150	1637280	LTEE	Ara+6	ynfE	coding (2017-2019/2427 nt)	20000
ZDB464	IS150	16990	LTEE	Ara-3	mokC/nhaA	intergenic (-32/-496)	20000
ZDB464	IS150	643362	LTEE	Ara-3	ybeF	coding (598-600/954 nt)	20000
ZDB464	IS150	968326	LTEE	Ara-3	pflA/pflB	intergenic (-153/+37)	20000
ZDB464	IS150	1270660	LTEE	Ara-3	ldrC/chaA	intergenic (-167/+235)	20000
ZDB464	IS150	1462320	LTEE	Ara-3	mokB/trg	intergenic (-82/-257)	20000
ZDB464	IS150	1776434	LTEE	Ara-3	pheS/pheM	intergenic (-225/+56)	20000
ZDB464	IS150	2122426	LTEE	Ara-3	ECB_02013	coding (198-200/216 nt)	20000
ZDB464	IS150	3015771	LTEE	Ara-3	ECB_02816	coding (1192-1194/1677 nt)	20000
ZDB464	IS150	3268052	LTEE	Ara-3	yhbE/rpmA	intergenic (-83/+42)	20000
ZDB464	IS150	4110237	LTEE	Ara-3	metL	coding (296-298/2433 nt)	20000
ZDB464	IS150	4435950	LTEE	Ara-3	ytfT	coding (127-130/1023 nt)	20000
ZDB464	IS150	4613020	LTEE	Ara-3	smp/serB	intergenic (-17/-87)	20000
11390	IS150	16972	LTEE	Ara-6	mokC/nhaA	intergenic (-14/-514)	50000
11390	IS150	42718	LTEE	Ara-6	caiB	pseudogene (257-259/885 nt)	50000
11390	IS150	2406039	LTEE	Ara-6	fadL	coding (1076-1079/1347 nt)	50000
11390	IS150	2522220	LTEE	Ara-6	hyfA	coding (192-194/618 nt)	50000
11390	IS150	2593521	LTEE	Ara-6	hcaD	coding (776-779/1203 nt)	50000
11390	IS150	3015771	LTEE	Ara-6	ECB_02816	coding (1192-1194/1677 nt)	50000
11390	IS150	3143448	LTEE	Ara-6	ygjD/rpsU	intergenic (-88/-148)	50000
767A	IS150	241641	LTEE	Ara-6	insB-2	coding (136-138/504 nt)	500
1068B	IS150	1733329	LTEE	Ara-1	pykF	coding (365-367/1413 nt)	1500
11367	IS150	17045	LTEE	Ara+5	mokC/nhaA	intergenic (-87/-441)	50000
11367	IS150	23674	LTEE	Ara+5	insB-1	coding (135-138/504 nt)	50000
11367	IS150	766774	LTEE	Ara+5	aroG	coding (513-515/1053 nt)	50000
11367	IS150	1270660	LTEE	Ara+5	ldrC/chaA	intergenic (-167/+235)	50000
11367	IS150	2196654	LTEE	Ara+5	cirA	coding (1352-1354/1992 nt)	50000
11367	IS150	2734828	LTEE	Ara+5	ascF	coding (445-446/1458 nt)	50000
11367	IS150	3080114	LTEE	Ara+5	hybO	pseudogene (119-121/1005 nt)	50000
11367	IS150	3270443	LTEE	Ara+5	nlp/murA	intergenic (+21/+24)	50000
11367	IS150	3542568	LTEE	Ara+5	yhhT	coding (16-17/1050 nt)	50000
11367	IS150	4110237	LTEE	Ara+5	metL	coding (296-298/2433 nt)	50000
10953	IS150	1270125	LTEE	Ara+3	ldrB/ldrC	intergenic (-167/+258)	40000
1161B	IS150	4615675	LTEE	Ara+4	nadR	coding (147-149/1233 nt)	2000
1160A	IS150	4517778	LTEE	Ara+3	yjhS/yjhT	intergenic (-46/+16)	2000
8602A	IS150	1270125	LTEE	Ara+3	ldrB/ldrC	intergenic (-167/+258)	20000
2173A	IS150	471785	LTEE	Ara+1	aes	coding (254-256/960 nt)	5000
2173A	IS150	651703	LTEE	Ara+1	ybeB/phpB	intergenic (-83/+174)	5000
2173A	IS150	1102032	LTEE	Ara+1	phoH	coding (756-758/1065 nt)	5000
2173A	IS150	1270660	LTEE	Ara+1	ldrC/chaA	intergenic (-167/+235)	5000
2173A	IS150	1354440	LTEE	Ara+1	sapA	coding (1038-1040/1644 nt)	5000
2173A	IS150	1462266	LTEE	Ara+1	mokB/trg	intergenic (-28/-311)	5000
2173A	IS150	1619834	LTEE	Ara+1	hokD/ECB_01533	intergenic (-71/+139)	5000
2173A	IS150	2093027	LTEE	Ara+1	yegO	coding (1534/3078 nt)	5000
2173A	IS150	2397543	LTEE	Ara+1	yfcTU	coding (1121-1123/2646 nt)	5000
2173A	IS150	3008938	LTEE	Ara+1	yeeU	coding (795/1062 nt)	5000
2173A	IS150	3697154	LTEE	Ara+1	rhsA	coding (278-280/4134 nt)	5000
2173A	IS150	4288527	LTEE	Ara+1	alsA	coding (1272-1276/1533 nt)	5000
2173A	IS150	4615673	LTEE	Ara+1	nadR	coding (145-148/1233 nt)	5000
2177A	IS150	1085247	LTEE	Ara+5	ycdG	coding (875-877/1329 nt)	5000
2177A	IS150	2684593	LTEE	Ara+5	csiD	coding (928-930/978 nt)	5000
2177A	IS150	3080114	LTEE	Ara+5	hybO	pseudogene (119-121/1005 nt)	5000
2177A	IS150	3270443	LTEE	Ara+5	nlp/murA	intergenic (+21/+24)	5000
4541A	IS150	3143448	LTEE	Ara-6	ygjD/rpsU	intergenic (-88/-148)	10000
4541A	IS150	3509840	LTEE	Ara-6	gntR	coding (338-340/996 nt)	10000
4541A	IS150	3570444	LTEE	Ara-6	yhiO/uspA	intergenic (-35/-354)	10000
10979	IS150	16990	LTEE	Ara-3	mokC/nhaA	intergenic (-32/-496)	40000
10979	IS150	241691	LTEE	Ara-3	insB-2	coding (186-188/504 nt)	40000
10979	IS150	643362	LTEE	Ara-3	ybeF	coding (598-600/954 nt)	40000
10979	IS150	1153894	LTEE	Ara-3	flgK	coding (948-950/1644 nt)	40000
10979	IS150	1270660	LTEE	Ara-3	ldrC/chaA	intergenic (-167/+235)	40000
10979	IS150	1451972	LTEE	Ara-3	acpD	coding (218-220/606 nt)	40000
10979	IS150	1462320	LTEE	Ara-3	mokB/trg	intergenic (-82/-257)	40000
10979	IS150	1729051	LTEE	Ara-3	ydhV	coding (2044-2047/2103 nt)	40000
10979	IS150	1776434	LTEE	Ara-3	pheS/pheM	intergenic (-225/+56)	40000
10979	IS150	2122426	LTEE	Ara-3	ECB_02013	coding (198-200/216 nt)	40000
10979	IS150	2655781	LTEE	Ara-3	yfiH	coding (660-662/732 nt)	40000
10979	IS150	2877313	LTEE	Ara-3	kduD	coding (565-567/762 nt)	40000
10979	IS150	2899615	LTEE	Ara-3	yqeB	coding (378-380/1626 nt)	40000
10979	IS150	3015771	LTEE	Ara-3	ECB_02816	coding (1192-1194/1677 nt)	40000
10979	IS150	3192744	LTEE	Ara-3	tdcG/tdcF	intergenic (-61/+8)	40000
10979	IS150	3268052	LTEE	Ara-3	yhbE/rpmA	intergenic (-83/+42)	40000
10979	IS150	3680780	LTEE	Ara-3	sgbE	coding (239-241/696 nt)	40000
10979	IS150	3697154	LTEE	Ara-3	rhsA	coding (278-280/4134 nt)	40000
10979	IS150	4110237	LTEE	Ara-3	metL	coding (296-298/2433 nt)	40000
10979	IS150	4289282	LTEE	Ara-3	alsA	coding (519-521/1533 nt)	40000
10979	IS150	4415710	LTEE	Ara-3	cycA	coding (848-850/1413 nt)	40000
10979	IS150	4588156	LTEE	Ara-3	mdoB	coding (518-520/2292 nt)	40000
10979	IS150	4613020	LTEE	Ara-3	smp/serB	intergenic (-17/-87)	40000
10417	IS150	1462251	LTEE	Ara+6	mokB/trg	intergenic (-13/-326)	30000
10985	IS150	1462251	LTEE	Ara+6	mokB/trg	intergenic (-13/-326)	40000
CZB152	IS150	16990	LTEE	Ara-3	mokC/nhaA	intergenic (-32/-496)	33000
CZB152	IS150	620126	LTEE	Ara-3	dsbG	coding (497-499/762 nt)	33000
CZB152	IS150	643362	LTEE	Ara-3	ybeF	coding (598-600/954 nt)	33000
CZB152	IS150	1270660	LTEE	Ara-3	ldrC/chaA	intergenic (-167/+235)	33000
CZB152	IS150	1451972	LTEE	Ara-3	acpD	coding (218-220/606 nt)	33000
CZB152	IS150	1462320	LTEE	Ara-3	mokB/trg	intergenic (-82/-257)	33000
CZB152	IS150	1729051	LTEE	Ara-3	ydhV	coding (2044-2047/2103 nt)	33000
CZB152	IS150	1776434	LTEE	Ara-3	pheS/pheM	intergenic (-225/+56)	33000
CZB152	IS150	2122426	LTEE	Ara-3	ECB_02013	coding (198-200/216 nt)	33000
CZB152	IS150	2655781	LTEE	Ara-3	yfiH	coding (660-662/732 nt)	33000
CZB152	IS150	2899615	LTEE	Ara-3	yqeB	coding (378-380/1626 nt)	33000
CZB152	IS150	3015771	LTEE	Ara-3	ECB_02816	coding (1192-1194/1677 nt)	33000
CZB152	IS150	3268052	LTEE	Ara-3	yhbE/rpmA	intergenic (-83/+42)	33000
CZB152	IS150	3697154	LTEE	Ara-3	rhsA	coding (278-280/4134 nt)	33000
CZB152	IS150	4110237	LTEE	Ara-3	metL	coding (296-298/2433 nt)	33000
CZB152	IS150	4415710	LTEE	Ara-3	cycA	coding (848-850/1413 nt)	33000
CZB152	IS150	4613020	LTEE	Ara-3	smp/serB	intergenic (-17/-87)	33000
7186B	IS150	3015771	LTEE	Ara+4	ECB_02816	coding (1192-1194/1677 nt)	15000
ZDB200	IS150	16990	LTEE	Ara-3	mokC/nhaA	intergenic (-32/-496)	31500
ZDB200	IS150	23675	LTEE	Ara-3	insB-1	coding (136-138/504 nt)	31500
ZDB200	IS150	430729	LTEE	Ara-3	insL-2	coding (57-59/1113 nt)	31500
ZDB200	IS150	643362	LTEE	Ara-3	ybeF	coding (598-600/954 nt)	31500
ZDB200	IS150	1270660	LTEE	Ara-3	ldrC/chaA	intergenic (-167/+235)	31500
ZDB200	IS150	1462320	LTEE	Ara-3	mokB/trg	intergenic (-82/-257)	31500
ZDB200	IS150	1776434	LTEE	Ara-3	pheS/pheM	intergenic (-225/+56)	31500
ZDB200	IS150	2122426	LTEE	Ara-3	ECB_02013	coding (198-200/216 nt)	31500
ZDB200	IS150	3015771	LTEE	Ara-3	ECB_02816	coding (1192-1194/1677 nt)	31500
ZDB200	IS150	3268052	LTEE	Ara-3	yhbE/rpmA	intergenic (-83/+42)	31500
ZDB200	IS150	3697154	LTEE	Ara-3	rhsA	coding (278-280/4134 nt)	31500
ZDB200	IS150	4110237	LTEE	Ara-3	metL	coding (296-298/2433 nt)	31500
ZDB200	IS150	4415710	LTEE	Ara-3	cycA	coding (848-850/1413 nt)	31500
ZDB200	IS150	4613020	LTEE	Ara-3	smp/serB	intergenic (-17/-87)	31500
4532A	IS150	16972	LTEE	Ara+3	mokC/nhaA	intergenic (-14/-514)	10000
4532A	IS150	1270125	LTEE	Ara+3	ldrB/ldrC	intergenic (-167/+258)	10000
2181A	IS150	16990	LTEE	Ara-3	mokC/nhaA	intergenic (-32/-496)	5000
2181A	IS150	471785	LTEE	Ara-3	aes	coding (254-256/960 nt)	5000
2181A	IS150	969836	LTEE	Ara-3	pflB	coding (810-812/2283 nt)	5000
2181A	IS150	4613020	LTEE	Ara-3	smp/serB	intergenic (-17/-87)	5000
ZDB13	IS150	16990	LTEE	Ara-3	mokC/nhaA	intergenic (-32/-496)	29000
ZDB13	IS150	643362	LTEE	Ara-3	ybeF	coding (598-600/954 nt)	29000
ZDB13	IS150	1270660	LTEE	Ara-3	ldrC/chaA	intergenic (-167/+235)	29000
ZDB13	IS150	1451972	LTEE	Ara-3	acpD	coding (218-220/606 nt)	29000
ZDB13	IS150	1462320	LTEE	Ara-3	mokB/trg	intergenic (-82/-257)	29000
ZDB13	IS150	1729051	LTEE	Ara-3	ydhV	coding (2044-2047/2103 nt)	29000
ZDB13	IS150	1776434	LTEE	Ara-3	pheS/pheM	intergenic (-225/+56)	29000
ZDB13	IS150	2122426	LTEE	Ara-3	ECB_02013	coding (198-200/216 nt)	29000
ZDB13	IS150	2655781	LTEE	Ara-3	yfiH	coding (660-662/732 nt)	29000
ZDB13	IS150	2899615	LTEE	Ara-3	yqeB	coding (378-380/1626 nt)	29000
ZDB13	IS150	3015771	LTEE	Ara-3	ECB_02816	coding (1192-1194/1677 nt)	29000
ZDB13	IS150	3268052	LTEE	Ara-3	yhbE/rpmA	intergenic (-83/+42)	29000
ZDB13	IS150	3697154	LTEE	Ara-3	rhsA	coding (278-280/4134 nt)	29000
ZDB13	IS150	4110237	LTEE	Ara-3	metL	coding (296-298/2433 nt)	29000
ZDB13	IS150	4415710	LTEE	Ara-3	cycA	coding (848-850/1413 nt)	29000
ZDB13	IS150	4613020	LTEE	Ara-3	smp/serB	intergenic (-17/-87)	29000
4536A	IS150	969836	LTEE	Ara-1	pflB	coding (810-812/2283 nt)	10000
4536A	IS150	1544289	LTEE	Ara-1	xasA	coding (150-152/1536 nt)	10000
4536A	IS150	1733647	LTEE	Ara-1	pykF	coding (683-685/1413 nt)	10000
7182B	IS150	3015771	LTEE	Ara-6	ECB_02816	coding (1192-1194/1677 nt)	15000
7182B	IS150	3143448	LTEE	Ara-6	ygjD/rpsU	intergenic (-88/-148)	15000
ZDB429	IS150	16990	LTEE	Ara-3	mokC/nhaA	intergenic (-32/-496)	10000
ZDB429	IS150	78888	LTEE	Ara-3	yabN	coding (1214-1216/1656 nt)	10000
ZDB429	IS150	680759	LTEE	Ara-3	asnB	coding (512-514/1665 nt)	10000
ZDB429	IS150	1270660	LTEE	Ara-3	ldrC/chaA	intergenic (-167/+235)	10000
ZDB429	IS150	1866486	LTEE	Ara-3	rnd	coding (82-84/1128 nt)	10000
ZDB429	IS150	2241332	LTEE	Ara-3	narP/ccmH	intergenic (+196/+13)	10000
ZDB429	IS150	4110237	LTEE	Ara-3	metL	coding (296-298/2433 nt)	10000
ZDB429	IS150	4415710	LTEE	Ara-3	cycA	coding (848-850/1413 nt)	10000
ZDB429	IS150	4613020	LTEE	Ara-3	smp/serB	intergenic (-17/-87)	10000
11346	IS150	1270125	LTEE	Ara+3	ldrB/ldrC	intergenic (-167/+258)	50000
4540A	IS150	467507	LTEE	Ara-5	htpG	coding (321-323/1875 nt)	10000
4540A	IS150	968326	LTEE	Ara-5	pflA/pflB	intergenic (-153/+37)	10000
4540A	IS150	1462251	LTEE	Ara-5	mokB/trg	intergenic (-13/-326)	10000
4540A	IS150	2157881	LTEE	Ara-5	yehM	coding (991-993/2280 nt)	10000
4540A	IS150	2283472	LTEE	Ara-5	yfaA/gyrA	intergenic (-128/+19)	10000
4540A	IS150	4252526	LTEE	Ara-5	uvrA	coding (276-278/2823 nt)	10000
4540A	IS150	4588156	LTEE	Ara-5	mdoB	coding (518-520/2292 nt)	10000
11343	IS150	1462251	LTEE	Ara+2	mokB/trg	intergenic (-13/-326)	50000
11343	IS150	2899615	LTEE	Ara+2	yqeB	coding (378-380/1626 nt)	50000
11343	IS150	3035123	LTEE	Ara+2	ECB_02836	coding (317-319/1224 nt)	50000
11348	IS150	766774	LTEE	Ara+4	aroG	coding (513-515/1053 nt)	50000
11348	IS150	3015771	LTEE	Ara+4	ECB_02816	coding (1192-1194/1677 nt)	50000
ZDB23	IS150	16990	LTEE	Ara-3	mokC/nhaA	intergenic (-32/-496)	31000
ZDB23	IS150	643362	LTEE	Ara-3	ybeF	coding (598-600/954 nt)	31000
ZDB23	IS150	1270660	LTEE	Ara-3	ldrC/chaA	intergenic (-167/+235)	31000
ZDB23	IS150	1451972	LTEE	Ara-3	acpD	coding (218-220/606 nt)	31000
ZDB23	IS150	1462320	LTEE	Ara-3	mokB/trg	intergenic (-82/-257)	31000
ZDB23	IS150	1729051	LTEE	Ara-3	ydhV	coding (2044-2047/2103 nt)	31000
ZDB23	IS150	1776434	LTEE	Ara-3	pheS/pheM	intergenic (-225/+56)	31000
ZDB23	IS150	2122426	LTEE	Ara-3	ECB_02013	coding (198-200/216 nt)	31000
ZDB23	IS150	2655781	LTEE	Ara-3	yfiH	coding (660-662/732 nt)	31000
ZDB23	IS150	2899615	LTEE	Ara-3	yqeB	coding (378-380/1626 nt)	31000
ZDB23	IS150	3015771	LTEE	Ara-3	ECB_02816	coding (1192-1194/1677 nt)	31000
ZDB23	IS150	3268052	LTEE	Ara-3	yhbE/rpmA	intergenic (-83/+42)	31000
ZDB23	IS150	3697154	LTEE	Ara-3	rhsA	coding (278-280/4134 nt)	31000
ZDB23	IS150	4110237	LTEE	Ara-3	metL	coding (296-298/2433 nt)	31000
ZDB23	IS150	4333228	LTEE	Ara-3	lysU	coding (208-210/1518 nt)	31000
ZDB23	IS150	4415710	LTEE	Ara-3	cycA	coding (848-850/1413 nt)	31000
ZDB23	IS150	4613020	LTEE	Ara-3	smp/serB	intergenic (-17/-87)	31000
9282A	IS150	16973	LTEE	Ara+1	mokC/nhaA	intergenic (-15/-514)	20000
9282A	IS150	336055	LTEE	Ara+1	lacZ	coding (2805-2807/3075 nt)	20000
9282A	IS150	490481	LTEE	Ara+1	ybbN/ybbO	intergenic (-34/+25)	20000
9282A	IS150	589936	LTEE	Ara+1	insB-7	coding (135-138/504 nt)	20000
9282A	IS150	651703	LTEE	Ara+1	ybeB/phpB	intergenic (-83/+174)	20000
9282A	IS150	1102032	LTEE	Ara+1	phoH	coding (756-758/1065 nt)	20000
9282A	IS150	1270660	LTEE	Ara+1	ldrC/chaA	intergenic (-167/+235)	20000
9282A	IS150	1354425	LTEE	Ara+1	sapA	coding (1053-1055/1644 nt)	20000
9282A	IS150	1462266	LTEE	Ara+1	mokB/trg	intergenic (-28/-311)	20000
9282A	IS150	1619834	LTEE	Ara+1	hokD/ECB_01533	intergenic (-71/+139)	20000
9282A	IS150	2086923	LTEE	Ara+1	yegL/yegM	intergenic (-1344/-199)	20000
9282A	IS150	2397543	LTEE	Ara+1	yfcTU	coding (1121-1123/2646 nt)	20000
9282A	IS150	3008938	LTEE	Ara+1	yeeU	coding (795/1062 nt)	20000
9282A	IS150	3680780	LTEE	Ara+1	sgbE	coding (239-241/696 nt)	20000
9282A	IS150	3697154	LTEE	Ara+1	rhsA	coding (278-280/4134 nt)	20000
9282A	IS150	3981782	LTEE	Ara+1	ECB_03710	coding (249-251/1224 nt)	20000
9282A	IS150	4049580	LTEE	Ara+1	yihS	coding (322-324/1242 nt)	20000
9282A	IS150	4203579	LTEE	Ara+1	metH	coding (821-823/3684 nt)	20000
9282A	IS150	4275713	LTEE	Ara+1	yjcO	coding (233-235/690 nt)	20000
9282A	IS150	4333227	LTEE	Ara+1	lysU	coding (208-211/1518 nt)	20000
9282A	IS150	4415710	LTEE	Ara+1	cycA	coding (848-850/1413 nt)	20000
9282A	IS150	4507928	LTEE	Ara+1	sgcA	coding (189-191/432 nt)	20000
9282A	IS150	4615673	LTEE	Ara+1	nadR	coding (145-148/1233 nt)	20000
JEB811	IS150	4049580	MAE	JEB811	yihS	coding (322-324/1242 nt)	13750
7181B	IS150	641158	LTEE	Ara-5	ybeM	coding (546-549/789 nt)	15000
7181B	IS150	1462251	LTEE	Ara-5	mokB/trg	intergenic (-13/-326)	15000
7181B	IS150	2283472	LTEE	Ara-5	yfaA/gyrA	intergenic (-128/+19)	15000
7181B	IS150	4252526	LTEE	Ara-5	uvrA	coding (276-278/2823 nt)	15000
7181B	IS150	4567086	LTEE	Ara-5	yjiX/yjiY	intergenic (-32/+16)	15000
10939	IS150	16972	LTEE	Ara-1	mokC/nhaA	intergenic (-14/-514)	40000
10939	IS150	241691	LTEE	Ara-1	insB-2	coding (186-188/504 nt)	40000
10939	IS150	1270660	LTEE	Ara-1	ldrC/chaA	intergenic (-167/+235)	40000
10939	IS150	1733647	LTEE	Ara-1	pykF	coding (683-685/1413 nt)	40000
10939	IS150	1821525	LTEE	Ara-1	ynjI	coding (573-575/1041 nt)	40000
10939	IS150	2877312	LTEE	Ara-1	kduD	coding (565-568/762 nt)	40000
10939	IS150	3015771	LTEE	Ara-1	ECB_02816	coding (1192-1195/1677 nt)	40000
ZDB16	IS150	16990	LTEE	Ara-3	mokC/nhaA	intergenic (-32/-496)	30000
ZDB16	IS150	1162790	LTEE	Ara-3	plsX	coding (601-603/1071 nt)	30000
ZDB16	IS150	1270660	LTEE	Ara-3	ldrC/chaA	intergenic (-167/+235)	30000
ZDB16	IS150	1462320	LTEE	Ara-3	mokB/trg	intergenic (-82/-257)	30000
ZDB16	IS150	3015771	LTEE	Ara-3	ECB_02816	coding (1192-1194/1677 nt)	30000
ZDB16	IS150	3454491	LTEE	Ara-3	yrfE	coding (342-343/561 nt)	30000
ZDB16	IS150	4110237	LTEE	Ara-3	metL	coding (296-298/2433 nt)	30000
ZDB16	IS150	4613020	LTEE	Ara-3	smp/serB	intergenic (-17/-87)	30000
958B	IS150	92425	LTEE	Ara+1	fruR/yabB	intergenic (+589/-11)	1000
10418	IS150	1462251	LTEE	Ara+6	mokB/trg	intergenic (-13/-326)	30000
1158C	IS150	651703	LTEE	Ara+1	ybeB/phpB	intergenic (-83/+174)	2000
1158C	IS150	1462266	LTEE	Ara+1	mokB/trg	intergenic (-28/-311)	2000
1158C	IS150	4615673	LTEE	Ara+1	nadR	coding (145-148/1233 nt)	2000
7184B	IS150	2899615	LTEE	Ara+2	yqeB	coding (378-380/1626 nt)	15000
JEB821	IS150	1513924	MAE	JEB821	narZ	coding (2816-2818/3741 nt)	13750
10433	IS150	17045	LTEE	Ara+5	mokC/nhaA	intergenic (-87/-441)	30000
10433	IS150	766774	LTEE	Ara+5	aroG	coding (513-515/1053 nt)	30000
10433	IS150	1270660	LTEE	Ara+5	ldrC/chaA	intergenic (-167/+235)	30000
10433	IS150	2196654	LTEE	Ara+5	cirA	coding (1352-1354/1992 nt)	30000
10433	IS150	2734828	LTEE	Ara+5	ascF	coding (445-446/1458 nt)	30000
10433	IS150	3080114	LTEE	Ara+5	hybO	pseudogene (119-121/1005 nt)	30000
10433	IS150	3270443	LTEE	Ara+5	nlp/murA	intergenic (+21/+24)	30000
10433	IS150	3542568	LTEE	Ara+5	yhhT	coding (16-17/1050 nt)	30000
10957	IS150	766774	LTEE	Ara+4	aroG	coding (513-515/1053 nt)	40000
10957	IS150	3015771	LTEE	Ara+4	ECB_02816	coding (1192-1194/1677 nt)	40000
7177A	IS150	16972	LTEE	Ara-1	mokC/nhaA	intergenic (-14/-514)	15000
7177A	IS150	241691	LTEE	Ara-1	insB-2	coding (186-188/504 nt)	15000
7177A	IS150	1270660	LTEE	Ara-1	ldrC/chaA	intergenic (-167/+235)	15000
7177A	IS150	1733647	LTEE	Ara-1	pykF	coding (683-685/1413 nt)	15000
7177A	IS150	1821525	LTEE	Ara-1	ynjI	coding (573-575/1041 nt)	15000
7177A	IS150	3015771	LTEE	Ara-1	ECB_02816	coding (1192-1195/1677 nt)	15000
2183B	IS150	2283472	LTEE	Ara-5	yfaA/gyrA	intergenic (-128/+19)	5000
2183B	IS150	4252526	LTEE	Ara-5	uvrA	coding (276-278/2823 nt)	5000
ZDB334	IS150	16990	LTEE	Ara-3	mokC/nhaA	intergenic (-32/-496)	28000
ZDB334	IS150	643362	LTEE	Ara-3	ybeF	coding (598-600/954 nt)	28000
ZDB334	IS150	1270660	LTEE	Ara-3	ldrC/chaA	intergenic (-167/+235)	28000
ZDB334	IS150	1451972	LTEE	Ara-3	acpD	coding (218-220/606 nt)	28000
ZDB334	IS150	1462320	LTEE	Ara-3	mokB/trg	intergenic (-82/-257)	28000
ZDB334	IS150	1729051	LTEE	Ara-3	ydhV	coding (2044-2047/2103 nt)	28000
ZDB334	IS150	1776434	LTEE	Ara-3	pheS/pheM	intergenic (-225/+56)	28000
ZDB334	IS150	2122426	LTEE	Ara-3	ECB_02013	coding (198-200/216 nt)	28000
ZDB334	IS150	3015771	LTEE	Ara-3	ECB_02816	coding (1192-1194/1677 nt)	28000
ZDB334	IS150	3268052	LTEE	Ara-3	yhbE/rpmA	intergenic (-83/+42)	28000
ZDB334	IS150	3697154	LTEE	Ara-3	rhsA	coding (278-280/4134 nt)	28000
ZDB334	IS150	4049580	LTEE	Ara-3	yihS	coding (322-324/1242 nt)	28000
ZDB334	IS150	4110237	LTEE	Ara-3	metL	coding (296-298/2433 nt)	28000
ZDB334	IS150	4613020	LTEE	Ara-3	smp/serB	intergenic (-17/-87)	28000
ZDB25	IS150	16990	LTEE	Ara-3	mokC/nhaA	intergenic (-32/-496)	31500
ZDB25	IS150	241641	LTEE	Ara-3	insB-2	coding (136-138/504 nt)	31500
ZDB25	IS150	643362	LTEE	Ara-3	ybeF	coding (598-600/954 nt)	31500
ZDB25	IS150	1270660	LTEE	Ara-3	ldrC/chaA	intergenic (-167/+235)	31500
ZDB25	IS150	1451972	LTEE	Ara-3	acpD	coding (218-220/606 nt)	31500
ZDB25	IS150	1462320	LTEE	Ara-3	mokB/trg	intergenic (-82/-257)	31500
ZDB25	IS150	1729051	LTEE	Ara-3	ydhV	coding (2044-2047/2103 nt)	31500
ZDB25	IS150	1776434	LTEE	Ara-3	pheS/pheM	intergenic (-225/+56)	31500
ZDB25	IS150	2122426	LTEE	Ara-3	ECB_02013	coding (198-200/216 nt)	31500
ZDB25	IS150	2655781	LTEE	Ara-3	yfiH	coding (660-662/732 nt)	31500
ZDB25	IS150	2835916	LTEE	Ara-3	ygdD	coding (333-335/396 nt)	31500
ZDB25	IS150	2899615	LTEE	Ara-3	yqeB	coding (378-380/1626 nt)	31500
ZDB25	IS150	3015771	LTEE	Ara-3	ECB_02816	coding (1192-1194/1677 nt)	31500
ZDB25	IS150	3268052	LTEE	Ara-3	yhbE/rpmA	intergenic (-83/+42)	31500
ZDB25	IS150	3697154	LTEE	Ara-3	rhsA	coding (278-280/4134 nt)	31500
ZDB25	IS150	4110237	LTEE	Ara-3	metL	coding (296-298/2433 nt)	31500
ZDB25	IS150	4415710	LTEE	Ara-3	cycA	coding (848-850/1413 nt)	31500
ZDB25	IS150	4613020	LTEE	Ara-3	smp/serB	intergenic (-17/-87)	31500
10948	IS150	17045	LTEE	Ara-5	mokC/nhaA	intergenic (-87/-441)	40000
10948	IS150	641158	LTEE	Ara-5	ybeM	coding (546-549/789 nt)	40000
10948	IS150	835448	LTEE	Ara-5	ybiN	coding (492-494/927 nt)	40000
10948	IS150	970687	LTEE	Ara-5	pflB/focA	intergenic (-40/+13)	40000
10948	IS150	1101970	LTEE	Ara-5	phoH	coding (694-696/1065 nt)	40000
10948	IS150	1462251	LTEE	Ara-5	mokB/trg	intergenic (-13/-326)	40000
10948	IS150	2283472	LTEE	Ara-5	yfaA/gyrA	intergenic (-128/+19)	40000
10948	IS150	2482156	LTEE	Ara-5	yfeG	coding (544-546/1053 nt)	40000
10948	IS150	3036431	LTEE	Ara-5	ECB_02837	coding (502-504/1494 nt)	40000
10948	IS150	3589875	LTEE	Ara-5	yhiU	coding (1153-1155/1158 nt)	40000
10948	IS150	4252526	LTEE	Ara-5	uvrA	coding (276-278/2823 nt)	40000
10948	IS150	4567086	LTEE	Ara-5	yjiX/yjiY	intergenic (-32/+16)	40000
4534A	IS150	3080114	LTEE	Ara+5	hybO	pseudogene (119-121/1005 nt)	10000
4534A	IS150	3270443	LTEE	Ara+5	nlp/murA	intergenic (+21/+24)	10000
ZDB478	IS150	16990	LTEE	Ara-3	mokC/nhaA	intergenic (-32/-496)	25000
ZDB478	IS150	643362	LTEE	Ara-3	ybeF	coding (598-600/954 nt)	25000
ZDB478	IS150	1270660	LTEE	Ara-3	ldrC/chaA	intergenic (-167/+235)	25000
ZDB478	IS150	1451972	LTEE	Ara-3	acpD	coding (218-220/606 nt)	25000
ZDB478	IS150	1462320	LTEE	Ara-3	mokB/trg	intergenic (-82/-257)	25000
ZDB478	IS150	1776434	LTEE	Ara-3	pheS/pheM	intergenic (-225/+56)	25000
ZDB478	IS150	2122426	LTEE	Ara-3	ECB_02013	coding (198-200/216 nt)	25000
ZDB478	IS150	2877313	LTEE	Ara-3	kduD	coding (565-567/762 nt)	25000
ZDB478	IS150	3015771	LTEE	Ara-3	ECB_02816	coding (1192-1194/1677 nt)	25000
ZDB478	IS150	3268052	LTEE	Ara-3	yhbE/rpmA	intergenic (-83/+42)	25000
ZDB478	IS150	3697154	LTEE	Ara-3	rhsA	coding (278-280/4134 nt)	25000
ZDB478	IS150	4110237	LTEE	Ara-3	metL	coding (296-298/2433 nt)	25000
ZDB478	IS150	4613020	LTEE	Ara-3	smp/serB	intergenic (-17/-87)	25000
JEB814	IS150	959203	MAE	JEB814	dmsA	coding (1152-1155/2445 nt)	13750
JEB814	IS150	1462251	MAE	JEB814	mokB/trg	intergenic (-13/-326)	13750
4530A	IS150	16973	LTEE	Ara+1	mokC/nhaA	intergenic (-15/-514)	10000
4530A	IS150	490481	LTEE	Ara+1	ybbN/ybbO	intergenic (-34/+25)	10000
4530A	IS150	589936	LTEE	Ara+1	insB-7	coding (135-138/504 nt)	10000
4530A	IS150	651703	LTEE	Ara+1	ybeB/phpB	intergenic (-83/+174)	10000
4530A	IS150	1102032	LTEE	Ara+1	phoH	coding (756-758/1065 nt)	10000
4530A	IS150	1270660	LTEE	Ara+1	ldrC/chaA	intergenic (-167/+235)	10000
4530A	IS150	1462266	LTEE	Ara+1	mokB/trg	intergenic (-28/-311)	10000
4530A	IS150	1515685	LTEE	Ara+1	narZ	coding (1055-1057/3741 nt)	10000
4530A	IS150	1619834	LTEE	Ara+1	hokD/ECB_01533	intergenic (-71/+139)	10000
4530A	IS150	2319941	LTEE	Ara+1	pmrD	coding (109-111/267 nt)	10000
4530A	IS150	2397543	LTEE	Ara+1	yfcTU	coding (1121-1123/2646 nt)	10000
4530A	IS150	3008938	LTEE	Ara+1	yeeU	coding (795/1062 nt)	10000
4530A	IS150	3697154	LTEE	Ara+1	rhsA	coding (278-280/4134 nt)	10000
4530A	IS150	4415710	LTEE	Ara+1	cycA	coding (848-850/1413 nt)	10000
4530A	IS150	4615673	LTEE	Ara+1	nadR	coding (145-148/1233 nt)	10000
8598A	IS150	2522220	LTEE	Ara-6	hyfA	coding (192-194/618 nt)	20000
8598A	IS150	3015771	LTEE	Ara-6	ECB_02816	coding (1192-1194/1677 nt)	20000
8598A	IS150	3143448	LTEE	Ara-6	ygjD/rpsU	intergenic (-88/-148)	20000
2179B	IS150	1733647	LTEE	Ara-1	pykF	coding (683-685/1413 nt)	5000
10408	IS150	2899615	LTEE	Ara+2	yqeB	coding (378-380/1626 nt)	30000
ZDB564	IS150	16990	LTEE	Ara-3	mokC/nhaA	intergenic (-32/-496)	31500
ZDB564	IS150	643362	LTEE	Ara-3	ybeF	coding (598-600/954 nt)	31500
ZDB564	IS150	1270660	LTEE	Ara-3	ldrC/chaA	intergenic (-167/+235)	31500
ZDB564	IS150	1451972	LTEE	Ara-3	acpD	coding (218-220/606 nt)	31500
ZDB564	IS150	1462320	LTEE	Ara-3	mokB/trg	intergenic (-82/-257)	31500
ZDB564	IS150	1729051	LTEE	Ara-3	ydhV	coding (2044-2047/2103 nt)	31500
ZDB564	IS150	1776434	LTEE	Ara-3	pheS/pheM	intergenic (-225/+56)	31500
ZDB564	IS150	2122426	LTEE	Ara-3	ECB_02013	coding (198-200/216 nt)	31500
ZDB564	IS150	2655781	LTEE	Ara-3	yfiH	coding (660-662/732 nt)	31500
ZDB564	IS150	2899615	LTEE	Ara-3	yqeB	coding (378-380/1626 nt)	31500
ZDB564	IS150	3015771	LTEE	Ara-3	ECB_02816	coding (1192-1194/1677 nt)	31500
ZDB564	IS150	3268052	LTEE	Ara-3	yhbE/rpmA	intergenic (-83/+42)	31500
ZDB564	IS150	3697154	LTEE	Ara-3	rhsA	coding (278-280/4134 nt)	31500
ZDB564	IS150	4110237	LTEE	Ara-3	metL	coding (296-298/2433 nt)	31500
ZDB564	IS150	4415710	LTEE	Ara-3	cycA	coding (848-850/1413 nt)	31500
ZDB564	IS150	4613020	LTEE	Ara-3	smp/serB	intergenic (-17/-87)	31500
11005	IS150	16972	LTEE	Ara-6	mokC/nhaA	intergenic (-14/-514)	40000
11005	IS150	146998	LTEE	Ara-6	yadH	coding (494-496/771 nt)	40000
11005	IS150	241641	LTEE	Ara-6	insB-2	coding (136-138/504 nt)	40000
11005	IS150	315207	LTEE	Ara-6	yahJ/yahK	intergenic (+51/-322)	40000
11005	IS150	1101850	LTEE	Ara-6	phoH	coding (574-576/1065 nt)	40000
11005	IS150	1136030	LTEE	Ara-6	dinI	coding (28-30/246 nt)	40000
11005	IS150	1270660	LTEE	Ara-6	ldrC/chaA	intergenic (-167/+235)	40000
11005	IS150	1462253	LTEE	Ara-6	mokB/trg	intergenic (-15/-326)	40000
11005	IS150	1515685	LTEE	Ara-6	narZ	coding (1055-1057/3741 nt)	40000
11005	IS150	1859000	LTEE	Ara-6	yeaS	coding (336-338/639 nt)	40000
11005	IS150	1992368	LTEE	Ara-6	shiA	coding (727-729/1317 nt)	40000
11005	IS150	2397543	LTEE	Ara-6	yfcTU	coding (1121-1123/2646 nt)	40000
11005	IS150	2570965	LTEE	Ara-6	yfhM	coding (2140-2142/4962 nt)	40000
11005	IS150	3015771	LTEE	Ara-6	ECB_02816	coding (1192-1194/1677 nt)	40000
11005	IS150	3143448	LTEE	Ara-6	ygjD/rpsU	intergenic (-88/-148)	40000
11005	IS150	3713694	LTEE	Ara-6	ECB_03460	coding (704-706/4851 nt)	40000
11005	IS150	4453625	LTEE	Ara-6	mgtA/yjgF	intergenic (+27/+177)	40000
10432	IS150	17045	LTEE	Ara+5	mokC/nhaA	intergenic (-87/-441)	30000
10432	IS150	766774	LTEE	Ara+5	aroG	coding (513-515/1053 nt)	30000
10432	IS150	1270660	LTEE	Ara+5	ldrC/chaA	intergenic (-167/+235)	30000
10432	IS150	2196654	LTEE	Ara+5	cirA	coding (1352-1354/1992 nt)	30000
10432	IS150	2734828	LTEE	Ara+5	ascF	coding (445-446/1458 nt)	30000
10432	IS150	3080114	LTEE	Ara+5	hybO	pseudogene (119-121/1005 nt)	30000
10432	IS150	3270443	LTEE	Ara+5	nlp/murA	intergenic (+21/+24)	30000
10432	IS150	3542568	LTEE	Ara+5	yhhT	coding (16-17/1050 nt)	30000
10956	IS150	766774	LTEE	Ara+4	aroG	coding (513-515/1053 nt)	40000
10956	IS150	3015771	LTEE	Ara+4	ECB_02816	coding (1192-1194/1677 nt)	40000
11342	IS150	1462251	LTEE	Ara+2	mokB/trg	intergenic (-13/-326)	50000
11342	IS150	2899615	LTEE	Ara+2	yqeB	coding (378-380/1626 nt)	50000
11342	IS150	3035123	LTEE	Ara+2	ECB_02836	coding (317-319/1224 nt)	50000
10447	IS150	16972	LTEE	Ara-6	mokC/nhaA	intergenic (-14/-514)	30000
10447	IS150	146998	LTEE	Ara-6	yadH	coding (494-496/771 nt)	30000
10447	IS150	1270660	LTEE	Ara-6	ldrC/chaA	intergenic (-167/+235)	30000
10447	IS150	1757644	LTEE	Ara-6	ydiQ	coding (760-762/765 nt)	30000
10447	IS150	2570965	LTEE	Ara-6	yfhM	coding (2140-2142/4962 nt)	30000
10447	IS150	3015771	LTEE	Ara-6	ECB_02816	coding (1192-1194/1677 nt)	30000
10447	IS150	3143448	LTEE	Ara-6	ygjD/rpsU	intergenic (-88/-148)	30000
10391	IS150	16972	LTEE	Ara-1	mokC/nhaA	intergenic (-14/-514)	30000
10391	IS150	241691	LTEE	Ara-1	insB-2	coding (186-188/504 nt)	30000
10391	IS150	1270660	LTEE	Ara-1	ldrC/chaA	intergenic (-167/+235)	30000
10391	IS150	1733647	LTEE	Ara-1	pykF	coding (683-685/1413 nt)	30000
10391	IS150	1821525	LTEE	Ara-1	ynjI	coding (573-575/1041 nt)	30000
10391	IS150	3015771	LTEE	Ara-1	ECB_02816	coding (1192-1195/1677 nt)	30000
2175B	IS150	1270125	LTEE	Ara+3	ldrB/ldrC	intergenic (-167/+258)	5000
8604A	IS150	118857	LTEE	Ara+5	hofB	coding (1045-1047/1386 nt)	20000
8604A	IS150	3015772	LTEE	Ara+5	ECB_02816	coding (1193-1194/1677 nt)	20000
8604A	IS150	3080114	LTEE	Ara+5	hybO	pseudogene (119-121/1005 nt)	20000
8604A	IS150	3270443	LTEE	Ara+5	nlp/murA	intergenic (+21/+24)	20000
7185B	IS150	1270125	LTEE	Ara+3	ldrB/ldrC	intergenic (-167/+258)	15000
11349	IS150	766774	LTEE	Ara+4	aroG	coding (513-515/1053 nt)	50000
11349	IS150	3015771	LTEE	Ara+4	ECB_02816	coding (1192-1194/1677 nt)	50000
1070B	IS150	3542565	LTEE	Ara-3	yhhT	coding (13-16/1050 nt)	1500
ZDB310	IS150	16990	LTEE	Ara-3	mokC/nhaA	intergenic (-32/-496)	27000
ZDB310	IS150	643362	LTEE	Ara-3	ybeF	coding (598-600/954 nt)	27000
ZDB310	IS150	1270660	LTEE	Ara-3	ldrC/chaA	intergenic (-167/+235)	27000
ZDB310	IS150	1451972	LTEE	Ara-3	acpD	coding (218-220/606 nt)	27000
ZDB310	IS150	1462320	LTEE	Ara-3	mokB/trg	intergenic (-82/-257)	27000
ZDB310	IS150	1729051	LTEE	Ara-3	ydhV	coding (2044-2047/2103 nt)	27000
ZDB310	IS150	1776434	LTEE	Ara-3	pheS/pheM	intergenic (-225/+56)	27000
ZDB310	IS150	2122426	LTEE	Ara-3	ECB_02013	coding (198-200/216 nt)	27000
ZDB310	IS150	2655781	LTEE	Ara-3	yfiH	coding (660-662/732 nt)	27000
ZDB310	IS150	3015771	LTEE	Ara-3	ECB_02816	coding (1192-1194/1677 nt)	27000
ZDB310	IS150	3268052	LTEE	Ara-3	yhbE/rpmA	intergenic (-83/+42)	27000
ZDB310	IS150	3697154	LTEE	Ara-3	rhsA	coding (278-280/4134 nt)	27000
ZDB310	IS150	4110237	LTEE	Ara-3	metL	coding (296-298/2433 nt)	27000
ZDB310	IS150	4613020	LTEE	Ara-3	smp/serB	intergenic (-17/-87)	27000
1166A	IS150	1462320	LTEE	Ara-3	mokB/trg	intergenic (-82/-257)	2000
1166A	IS150	2405654	LTEE	Ara-3	fadL	coding (691-693/1347 nt)	2000
ZDB20	IS150	16990	LTEE	Ara-3	mokC/nhaA	intergenic (-32/-496)	30500
ZDB20	IS150	643362	LTEE	Ara-3	ybeF	coding (598-600/954 nt)	30500
ZDB20	IS150	1270660	LTEE	Ara-3	ldrC/chaA	intergenic (-167/+235)	30500
ZDB20	IS150	1451972	LTEE	Ara-3	acpD	coding (218-220/606 nt)	30500
ZDB20	IS150	1462320	LTEE	Ara-3	mokB/trg	intergenic (-82/-257)	30500
ZDB20	IS150	1729051	LTEE	Ara-3	ydhV	coding (2044-2047/2103 nt)	30500
ZDB20	IS150	1776434	LTEE	Ara-3	pheS/pheM	intergenic (-225/+56)	30500
ZDB20	IS150	2122426	LTEE	Ara-3	ECB_02013	coding (198-200/216 nt)	30500
ZDB20	IS150	2655781	LTEE	Ara-3	yfiH	coding (660-662/732 nt)	30500
ZDB20	IS150	2899615	LTEE	Ara-3	yqeB	coding (378-380/1626 nt)	30500
ZDB20	IS150	3015771	LTEE	Ara-3	ECB_02816	coding (1192-1194/1677 nt)	30500
ZDB20	IS150	3268052	LTEE	Ara-3	yhbE/rpmA	intergenic (-83/+42)	30500
ZDB20	IS150	3697154	LTEE	Ara-3	rhsA	coding (278-280/4134 nt)	30500
ZDB20	IS150	4110237	LTEE	Ara-3	metL	coding (296-298/2433 nt)	30500
ZDB20	IS150	4415710	LTEE	Ara-3	cycA	coding (848-850/1413 nt)	30500
ZDB20	IS150	4613020	LTEE	Ara-3	smp/serB	intergenic (-17/-87)	30500
7188A	IS150	1462251	LTEE	Ara+6	mokB/trg	intergenic (-13/-326)	15000
11368	IS150	17045	LTEE	Ara+5	mokC/nhaA	intergenic (-87/-441)	50000
11368	IS150	23674	LTEE	Ara+5	insB-1	coding (135-138/504 nt)	50000
11368	IS150	589936	LTEE	Ara+5	insB-7	coding (135-138/504 nt)	50000
11368	IS150	766774	LTEE	Ara+5	aroG	coding (513-515/1053 nt)	50000
11368	IS150	1270660	LTEE	Ara+5	ldrC/chaA	intergenic (-167/+235)	50000
11368	IS150	2196654	LTEE	Ara+5	cirA	coding (1352-1354/1992 nt)	50000
11368	IS150	2734828	LTEE	Ara+5	ascF	coding (445-446/1458 nt)	50000
11368	IS150	3080114	LTEE	Ara+5	hybO	pseudogene (119-121/1005 nt)	50000
11368	IS150	3270443	LTEE	Ara+5	nlp/murA	intergenic (+21/+24)	50000
11368	IS150	3542568	LTEE	Ara+5	yhhT	coding (16-17/1050 nt)	50000
8603A	IS150	1270660	LTEE	Ara+4	ldrC/chaA	intergenic (-167/+235)	20000
8603A	IS150	3015771	LTEE	Ara+4	ECB_02816	coding (1192-1194/1677 nt)	20000
10938	IS150	16972	LTEE	Ara-1	mokC/nhaA	intergenic (-14/-514)	40000
10938	IS150	241691	LTEE	Ara-1	insB-2	coding (186-188/504 nt)	40000
10938	IS150	1270660	LTEE	Ara-1	ldrC/chaA	intergenic (-167/+235)	40000
10938	IS150	1733647	LTEE	Ara-1	pykF	coding (683-685/1413 nt)	40000
10938	IS150	1821525	LTEE	Ara-1	ynjI	coding (573-575/1041 nt)	40000
10938	IS150	3015771	LTEE	Ara-1	ECB_02816	coding (1192-1195/1677 nt)	40000
ZDB17	IS150	16990	LTEE	Ara-3	mokC/nhaA	intergenic (-32/-496)	30000
ZDB17	IS150	643362	LTEE	Ara-3	ybeF	coding (598-600/954 nt)	30000
ZDB17	IS150	1270660	LTEE	Ara-3	ldrC/chaA	intergenic (-167/+235)	30000
ZDB17	IS150	1451972	LTEE	Ara-3	acpD	coding (218-220/606 nt)	30000
ZDB17	IS150	1462320	LTEE	Ara-3	mokB/trg	intergenic (-82/-257)	30000
ZDB17	IS150	1729051	LTEE	Ara-3	ydhV	coding (2044-2047/2103 nt)	30000
ZDB17	IS150	1776434	LTEE	Ara-3	pheS/pheM	intergenic (-225/+56)	30000
ZDB17	IS150	2122426	LTEE	Ara-3	ECB_02013	coding (198-200/216 nt)	30000
ZDB17	IS150	2655781	LTEE	Ara-3	yfiH	coding (660-662/732 nt)	30000
ZDB17	IS150	2899615	LTEE	Ara-3	yqeB	coding (378-380/1626 nt)	30000
ZDB17	IS150	3015771	LTEE	Ara-3	ECB_02816	coding (1192-1194/1677 nt)	30000
ZDB17	IS150	3268052	LTEE	Ara-3	yhbE/rpmA	intergenic (-83/+42)	30000
ZDB17	IS150	3697154	LTEE	Ara-3	rhsA	coding (278-280/4134 nt)	30000
ZDB17	IS150	4110237	LTEE	Ara-3	metL	coding (296-298/2433 nt)	30000
ZDB17	IS150	4415710	LTEE	Ara-3	cycA	coding (848-850/1413 nt)	30000
ZDB17	IS150	4613020	LTEE	Ara-3	smp/serB	intergenic (-17/-87)	30000
11370	IS150	1462251	LTEE	Ara+6	mokB/trg	intergenic (-13/-326)	50000
2183A	IS150	1551735	LTEE	Ara-5	yddA	coding (1557-1559/1686 nt)	5000
2183A	IS150	2283472	LTEE	Ara-5	yfaA/gyrA	intergenic (-128/+19)	5000
2183A	IS150	4252526	LTEE	Ara-5	uvrA	coding (276-278/2823 nt)	5000
11340	IS150	17045	LTEE	Ara-5	mokC/nhaA	intergenic (-87/-441)	50000
11340	IS150	641158	LTEE	Ara-5	ybeM	coding (546-549/789 nt)	50000
11340	IS150	835448	LTEE	Ara-5	ybiN	coding (492-494/927 nt)	50000
11340	IS150	970687	LTEE	Ara-5	pflB/focA	intergenic (-40/+13)	50000
11340	IS150	1101970	LTEE	Ara-5	phoH	coding (694-696/1065 nt)	50000
11340	IS150	1462251	LTEE	Ara-5	mokB/trg	intergenic (-13/-326)	50000
11340	IS150	2283472	LTEE	Ara-5	yfaA/gyrA	intergenic (-128/+19)	50000
11340	IS150	2525337	LTEE	Ara-5	hyfC	pseudogene (436-438/720 nt)	50000
11340	IS150	2591648	LTEE	Ara-5	hcaC	coding (42-44/321 nt)	50000
11340	IS150	2877356	LTEE	Ara-5	kduD	coding (521-524/762 nt)	50000
11340	IS150	3036431	LTEE	Ara-5	ECB_02837	coding (502-504/1494 nt)	50000
11340	IS150	3686106	LTEE	Ara-5	yiaT	coding (454-456/741 nt)	50000
11340	IS150	4252526	LTEE	Ara-5	uvrA	coding (276-278/2823 nt)	50000
11340	IS150	4567086	LTEE	Ara-5	yjiX/yjiY	intergenic (-32/+16)	50000
ZDB317	IS150	16990	LTEE	Ara-3	mokC/nhaA	intergenic (-32/-496)	27000
ZDB317	IS150	643362	LTEE	Ara-3	ybeF	coding (598-600/954 nt)	27000
ZDB317	IS150	1270660	LTEE	Ara-3	ldrC/chaA	intergenic (-167/+235)	27000
ZDB317	IS150	1369616	LTEE	Ara-3	ycjM	coding (1033-1035/1680 nt)	27000
ZDB317	IS150	1451972	LTEE	Ara-3	acpD	coding (218-220/606 nt)	27000
ZDB317	IS150	1462320	LTEE	Ara-3	mokB/trg	intergenic (-82/-257)	27000
ZDB317	IS150	1729051	LTEE	Ara-3	ydhV	coding (2044-2047/2103 nt)	27000
ZDB317	IS150	1776434	LTEE	Ara-3	pheS/pheM	intergenic (-225/+56)	27000
ZDB317	IS150	2122426	LTEE	Ara-3	ECB_02013	coding (198-200/216 nt)	27000
ZDB317	IS150	2803508	LTEE	Ara-3	rumA	coding (419-421/1302 nt)	27000
ZDB317	IS150	3015771	LTEE	Ara-3	ECB_02816	coding (1192-1194/1677 nt)	27000
ZDB317	IS150	3268052	LTEE	Ara-3	yhbE/rpmA	intergenic (-83/+42)	27000
ZDB317	IS150	3542565	LTEE	Ara-3	yhhT	coding (13-16/1050 nt)	27000
ZDB317	IS150	3697154	LTEE	Ara-3	rhsA	coding (278-280/4134 nt)	27000
ZDB317	IS150	4049580	LTEE	Ara-3	yihS	coding (322-324/1242 nt)	27000
ZDB317	IS150	4110237	LTEE	Ara-3	metL	coding (296-298/2433 nt)	27000
ZDB317	IS150	4613020	LTEE	Ara-3	smp/serB	intergenic (-17/-87)	27000
4534B	IS150	3080114	LTEE	Ara+5	hybO	pseudogene (119-121/1005 nt)	10000
4534B	IS150	3270443	LTEE	Ara+5	nlp/murA	intergenic (+21/+24)	10000
ZDB488	IS150	16990	LTEE	Ara-3	mokC/nhaA	intergenic (-32/-496)	25000
ZDB488	IS150	643362	LTEE	Ara-3	ybeF	coding (598-600/954 nt)	25000
ZDB488	IS150	1270660	LTEE	Ara-3	ldrC/chaA	intergenic (-167/+235)	25000
ZDB488	IS150	1451972	LTEE	Ara-3	acpD	coding (218-220/606 nt)	25000
ZDB488	IS150	1462320	LTEE	Ara-3	mokB/trg	intergenic (-82/-257)	25000
ZDB488	IS150	1776434	LTEE	Ara-3	pheS/pheM	intergenic (-225/+56)	25000
ZDB488	IS150	2122426	LTEE	Ara-3	ECB_02013	coding (198-200/216 nt)	25000
ZDB488	IS150	3015771	LTEE	Ara-3	ECB_02816	coding (1192-1194/1677 nt)	25000
ZDB488	IS150	3268052	LTEE	Ara-3	yhbE/rpmA	intergenic (-83/+42)	25000
ZDB488	IS150	3697154	LTEE	Ara-3	rhsA	coding (278-280/4134 nt)	25000
ZDB488	IS150	4110237	LTEE	Ara-3	metL	coding (296-298/2433 nt)	25000
ZDB488	IS150	4560452	LTEE	Ara-3	hsdM	coding (570-572/1590 nt)	25000
ZDB488	IS150	4613020	LTEE	Ara-3	smp/serB	intergenic (-17/-87)	25000
1158A	IS150	1236769	LTEE	Ara+1	ycgB	coding (621-623/1533 nt)	2000
1158A	IS150	1462266	LTEE	Ara+1	mokB/trg	intergenic (-28/-311)	2000
1158A	IS150	4615673	LTEE	Ara+1	nadR	coding (145-148/1233 nt)	2000
JEB807	IS150	16972	MAE	JEB807	mokC/nhaA	intergenic (-14/-514)	13750
JEB807	IS150	1233603	MAE	JEB807	nhaB	coding (1263-1265/1542 nt)	13750
4530B	IS150	16973	LTEE	Ara+1	mokC/nhaA	intergenic (-15/-514)	10000
4530B	IS150	433808	LTEE	Ara+1	hupB/ppiD	intergenic (+30/-160)	10000
4530B	IS150	490481	LTEE	Ara+1	ybbN/ybbO	intergenic (-34/+25)	10000
4530B	IS150	651703	LTEE	Ara+1	ybeB/phpB	intergenic (-83/+174)	10000
4530B	IS150	1102032	LTEE	Ara+1	phoH	coding (756-758/1065 nt)	10000
4530B	IS150	1182761	LTEE	Ara+1	ycfJ/ycfQ	intergenic (+29/+31)	10000
4530B	IS150	1270660	LTEE	Ara+1	ldrC/chaA	intergenic (-167/+235)	10000
4530B	IS150	1462266	LTEE	Ara+1	mokB/trg	intergenic (-28/-311)	10000
4530B	IS150	1619834	LTEE	Ara+1	hokD/ECB_01533	intergenic (-71/+139)	10000
4530B	IS150	1651953	LTEE	Ara+1	ydgG	coding (846-848/1035 nt)	10000
4530B	IS150	1976732	LTEE	Ara+1	yedW	coding (89-91/672 nt)	10000
4530B	IS150	2397543	LTEE	Ara+1	yfcTU	coding (1121-1123/2646 nt)	10000
4530B	IS150	3008938	LTEE	Ara+1	yeeU	coding (795/1062 nt)	10000
4530B	IS150	3697154	LTEE	Ara+1	rhsA	coding (278-280/4134 nt)	10000
4530B	IS150	4415710	LTEE	Ara+1	cycA	coding (848-850/1413 nt)	10000
4530B	IS150	4615673	LTEE	Ara+1	nadR	coding (145-148/1233 nt)	10000
JEB817	IS150	16972	MAE	JEB817	mokC/nhaA	intergenic (-14/-514)	13750
JEB817	IS150	968326	MAE	JEB817	pflA/pflB	intergenic (-153/+37)	13750
JEB817	IS150	1462251	MAE	JEB817	mokB/trg	intergenic (-13/-326)	13750
JEB817	IS150	1549357	MAE	JEB817	yddB	coding (2212-2214/2373 nt)	13750
2179A	IS150	1733647	LTEE	Ara-1	pykF	coding (683-685/1413 nt)	5000
8598B	IS150	16972	LTEE	Ara-6	mokC/nhaA	intergenic (-14/-514)	20000
8598B	IS150	3015771	LTEE	Ara-6	ECB_02816	coding (1192-1194/1677 nt)	20000
8598B	IS150	3143448	LTEE	Ara-6	ygjD/rpsU	intergenic (-88/-148)	20000
8598B	IS150	3234844	LTEE	Ara-6	yhbP	coding (306/444 nt)	20000
ZDB458	IS150	16990	LTEE	Ara-3	mokC/nhaA	intergenic (-32/-496)	20000
ZDB458	IS150	643362	LTEE	Ara-3	ybeF	coding (598-600/954 nt)	20000
ZDB458	IS150	1270660	LTEE	Ara-3	ldrC/chaA	intergenic (-167/+235)	20000
ZDB458	IS150	1462320	LTEE	Ara-3	mokB/trg	intergenic (-82/-257)	20000
ZDB458	IS150	1776434	LTEE	Ara-3	pheS/pheM	intergenic (-225/+56)	20000
ZDB458	IS150	2122426	LTEE	Ara-3	ECB_02013	coding (198-200/216 nt)	20000
ZDB458	IS150	2205497	LTEE	Ara-3	rihB	coding (875-877/942 nt)	20000
ZDB458	IS150	3015771	LTEE	Ara-3	ECB_02816	coding (1192-1194/1677 nt)	20000
ZDB458	IS150	3268052	LTEE	Ara-3	yhbE/rpmA	intergenic (-83/+42)	20000
ZDB458	IS150	4110237	LTEE	Ara-3	metL	coding (296-298/2433 nt)	20000
ZDB458	IS150	4613020	LTEE	Ara-3	smp/serB	intergenic (-17/-87)	20000
11006	IS150	42718	LTEE	Ara-6	caiB	pseudogene (257-259/885 nt)	40000
11006	IS150	2522220	LTEE	Ara-6	hyfA	coding (192-194/618 nt)	40000
11006	IS150	2593521	LTEE	Ara-6	hcaD	coding (776-779/1203 nt)	40000
11006	IS150	3015771	LTEE	Ara-6	ECB_02816	coding (1192-1194/1677 nt)	40000
11006	IS150	3143448	LTEE	Ara-6	ygjD/rpsU	intergenic (-88/-148)	40000
10414	IS150	766774	LTEE	Ara+4	aroG	coding (513-515/1053 nt)	30000
10414	IS150	3015771	LTEE	Ara+4	ECB_02816	coding (1192-1194/1677 nt)	30000
4538A	IS150	16990	LTEE	Ara-3	mokC/nhaA	intergenic (-32/-496)	10000
4538A	IS150	78888	LTEE	Ara-3	yabN	coding (1214-1216/1656 nt)	10000
4538A	IS150	680759	LTEE	Ara-3	asnB	coding (512-514/1665 nt)	10000
4538A	IS150	1270660	LTEE	Ara-3	ldrC/chaA	intergenic (-167/+235)	10000
4538A	IS150	1866486	LTEE	Ara-3	rnd	coding (82-84/1128 nt)	10000
4538A	IS150	2241332	LTEE	Ara-3	narP/ccmH	intergenic (+196/+13)	10000
4538A	IS150	4110237	LTEE	Ara-3	metL	coding (296-298/2433 nt)	10000
4538A	IS150	4613020	LTEE	Ara-3	smp/serB	intergenic (-17/-87)	10000
10983	IS150	17045	LTEE	Ara+5	mokC/nhaA	intergenic (-87/-441)	40000
10983	IS150	23674	LTEE	Ara+5	insB-1	coding (135-138/504 nt)	40000
10983	IS150	766774	LTEE	Ara+5	aroG	coding (513-515/1053 nt)	40000
10983	IS150	1270660	LTEE	Ara+5	ldrC/chaA	intergenic (-167/+235)	40000
10983	IS150	2196654	LTEE	Ara+5	cirA	coding (1352-1354/1992 nt)	40000
10983	IS150	2734828	LTEE	Ara+5	ascF	coding (445-446/1458 nt)	40000
10983	IS150	3080114	LTEE	Ara+5	hybO	pseudogene (119-121/1005 nt)	40000
10983	IS150	3270443	LTEE	Ara+5	nlp/murA	intergenic (+21/+24)	40000
10983	IS150	3542568	LTEE	Ara+5	yhhT	coding (16-17/1050 nt)	40000
7185A	IS150	1270125	LTEE	Ara+3	ldrB/ldrC	intergenic (-167/+258)	15000
10392	IS150	16972	LTEE	Ara-1	mokC/nhaA	intergenic (-14/-514)	30000
10392	IS150	241691	LTEE	Ara-1	insB-2	coding (186-188/504 nt)	30000
10392	IS150	1270660	LTEE	Ara-1	ldrC/chaA	intergenic (-167/+235)	30000
10392	IS150	1733647	LTEE	Ara-1	pykF	coding (683-685/1413 nt)	30000
10392	IS150	1821525	LTEE	Ara-1	ynjI	coding (573-575/1041 nt)	30000
10392	IS150	3015771	LTEE	Ara-1	ECB_02816	coding (1192-1195/1677 nt)	30000
2175A	IS150	1270125	LTEE	Ara+3	ldrB/ldrC	intergenic (-167/+258)	5000
8604B	IS150	118857	LTEE	Ara+5	hofB	coding (1045-1047/1386 nt)	20000
8604B	IS150	3015772	LTEE	Ara+5	ECB_02816	coding (1193-1194/1677 nt)	20000
8604B	IS150	3080114	LTEE	Ara+5	hybO	pseudogene (119-121/1005 nt)	20000
8604B	IS150	3270443	LTEE	Ara+5	nlp/murA	intergenic (+21/+24)	20000
1166B	IS150	16972	LTEE	Ara-3	mokC/nhaA	intergenic (-14/-514)	2000
1166B	IS150	92876	LTEE	Ara-3	yabB	coding (439-441/459 nt)	2000
1166B	IS150	1733141	LTEE	Ara-3	pykF	coding (177-179/1413 nt)	2000
1166B	IS150	2098365	LTEE	Ara-3	yegP	coding (69-71/333 nt)	2000
1070A	IS150	92876	LTEE	Ara-3	yabB	coding (439-441/459 nt)	1500
1070A	IS150	1733141	LTEE	Ara-3	pykF	coding (177-179/1413 nt)	1500
7188B	IS150	1462251	LTEE	Ara+6	mokB/trg	intergenic (-13/-326)	15000
11330	IS150	16972	LTEE	Ara-1	mokC/nhaA	intergenic (-14/-514)	50000
11330	IS150	241691	LTEE	Ara-1	insB-2	coding (186-188/504 nt)	50000
11330	IS150	1270660	LTEE	Ara-1	ldrC/chaA	intergenic (-167/+235)	50000
11330	IS150	1733647	LTEE	Ara-1	pykF	coding (683-685/1413 nt)	50000
11330	IS150	1821525	LTEE	Ara-1	ynjI	coding (573-575/1041 nt)	50000
11330	IS150	2877312	LTEE	Ara-1	kduD	coding (565-568/762 nt)	50000
11330	IS150	3015771	LTEE	Ara-1	ECB_02816	coding (1192-1195/1677 nt)	50000
JEB813	IS150	1786105	MAE	JEB813	yniB	coding (392-394/537 nt)	13750
8603B	IS150	3015771	LTEE	Ara+4	ECB_02816	coding (1192-1194/1677 nt)	20000
10451	IS150	16973	LTEE	Ara+1	mokC/nhaA	intergenic (-15/-514)	30000
10451	IS150	336055	LTEE	Ara+1	lacZ	coding (2805-2807/3075 nt)	30000
10451	IS150	386412	LTEE	Ara+1	phoR	coding (101/1296 nt)	30000
10451	IS150	490481	LTEE	Ara+1	ybbN/ybbO	intergenic (-34/+25)	30000
10451	IS150	589936	LTEE	Ara+1	insB-7	coding (135-138/504 nt)	30000
10451	IS150	651703	LTEE	Ara+1	ybeB/phpB	intergenic (-83/+174)	30000
10451	IS150	896463	LTEE	Ara+1	ECB_00838	coding (159-161/432 nt)	30000
10451	IS150	969836	LTEE	Ara+1	pflB	coding (810-812/2283 nt)	30000
10451	IS150	1102032	LTEE	Ara+1	phoH	coding (756-758/1065 nt)	30000
10451	IS150	1270660	LTEE	Ara+1	ldrC/chaA	intergenic (-167/+235)	30000
10451	IS150	1354425	LTEE	Ara+1	sapA	coding (1053-1055/1644 nt)	30000
10451	IS150	1462266	LTEE	Ara+1	mokB/trg	intergenic (-28/-311)	30000
10451	IS150	1619834	LTEE	Ara+1	hokD/ECB_01533	intergenic (-71/+139)	30000
10451	IS150	2086923	LTEE	Ara+1	yegL/yegM	intergenic (-1344/-199)	30000
10451	IS150	2196669	LTEE	Ara+1	cirA	coding (1337-1339/1992 nt)	30000
10451	IS150	2397543	LTEE	Ara+1	yfcTU	coding (1121-1123/2646 nt)	30000
10451	IS150	2655781	LTEE	Ara+1	yfiH	coding (660-662/732 nt)	30000
10451	IS150	3008938	LTEE	Ara+1	yeeU	coding (795/1062 nt)	30000
10451	IS150	3697154	LTEE	Ara+1	rhsA	coding (278-280/4134 nt)	30000
10451	IS150	3981782	LTEE	Ara+1	ECB_03710	coding (249-251/1224 nt)	30000
10451	IS150	4049580	LTEE	Ara+1	yihS	coding (322-324/1242 nt)	30000
10451	IS150	4182772	LTEE	Ara+1	zraS	coding (1241-1243/1377 nt)	30000
10451	IS150	4275713	LTEE	Ara+1	yjcO	coding (233-235/690 nt)	30000
10451	IS150	4415710	LTEE	Ara+1	cycA	coding (848-850/1413 nt)	30000
10451	IS150	4538542	LTEE	Ara+1	yjiE	coding (662/912 nt)	30000
10451	IS150	4615673	LTEE	Ara+1	nadR	coding (145-148/1233 nt)	30000
11345	IS150	1270125	LTEE	Ara+3	ldrB/ldrC	intergenic (-167/+258)	50000
4540B	IS150	471784	LTEE	Ara-5	aes	coding (257/960 nt)	10000
4540B	IS150	1270660	LTEE	Ara-5	ldrC/chaA	intergenic (-167/+235)	10000
4540B	IS150	1462251	LTEE	Ara-5	mokB/trg	intergenic (-13/-326)	10000
4540B	IS150	2283472	LTEE	Ara-5	yfaA/gyrA	intergenic (-128/+19)	10000
4540B	IS150	3015771	LTEE	Ara-5	ECB_02816	coding (1192-1194/1677 nt)	10000
4540B	IS150	3270443	LTEE	Ara-5	nlp/murA	intergenic (+21/+24)	10000
4540B	IS150	3550157	LTEE	Ara-5	rhsB	coding (278-280/4236 nt)	10000
4540B	IS150	4252526	LTEE	Ara-5	uvrA	coding (276-278/2823 nt)	10000
4540B	IS150	4259270	LTEE	Ara-5	yjcE	coding (358/1650 nt)	10000
10415	IS150	766774	LTEE	Ara+4	aroG	coding (513-515/1053 nt)	30000
10415	IS150	3015771	LTEE	Ara+4	ECB_02816	coding (1192-1194/1677 nt)	30000
ZDB199	IS150	16990	LTEE	Ara-3	mokC/nhaA	intergenic (-32/-496)	31500
ZDB199	IS150	1162790	LTEE	Ara-3	plsX	coding (601-603/1071 nt)	31500
ZDB199	IS150	1270660	LTEE	Ara-3	ldrC/chaA	intergenic (-167/+235)	31500
ZDB199	IS150	1462320	LTEE	Ara-3	mokB/trg	intergenic (-82/-257)	31500
ZDB199	IS150	3015771	LTEE	Ara-3	ECB_02816	coding (1192-1194/1677 nt)	31500
ZDB199	IS150	3080113	LTEE	Ara-3	hybO	pseudogene (119-122/1005 nt)	31500
ZDB199	IS150	3454491	LTEE	Ara-3	yrfE	coding (342-343/561 nt)	31500
ZDB199	IS150	4110237	LTEE	Ara-3	metL	coding (296-298/2433 nt)	31500
ZDB199	IS150	4613020	LTEE	Ara-3	smp/serB	intergenic (-17/-87)	31500
10982	IS150	17045	LTEE	Ara+5	mokC/nhaA	intergenic (-87/-441)	40000
10982	IS150	766774	LTEE	Ara+5	aroG	coding (513-515/1053 nt)	40000
10982	IS150	1270660	LTEE	Ara+5	ldrC/chaA	intergenic (-167/+235)	40000
10982	IS150	2196654	LTEE	Ara+5	cirA	coding (1352-1354/1992 nt)	40000
10982	IS150	2734828	LTEE	Ara+5	ascF	coding (445-446/1458 nt)	40000
10982	IS150	3080114	LTEE	Ara+5	hybO	pseudogene (119-121/1005 nt)	40000
10982	IS150	3270443	LTEE	Ara+5	nlp/murA	intergenic (+21/+24)	40000
10982	IS150	3542568	LTEE	Ara+5	yhhT	coding (16-17/1050 nt)	40000
9282B	IS150	16973	LTEE	Ara+1	mokC/nhaA	intergenic (-15/-514)	20000
9282B	IS150	336055	LTEE	Ara+1	lacZ	coding (2805-2807/3075 nt)	20000
9282B	IS150	490481	LTEE	Ara+1	ybbN/ybbO	intergenic (-34/+25)	20000
9282B	IS150	589936	LTEE	Ara+1	insB-7	coding (135-138/504 nt)	20000
9282B	IS150	651703	LTEE	Ara+1	ybeB/phpB	intergenic (-83/+174)	20000
9282B	IS150	896463	LTEE	Ara+1	ECB_00838	coding (159-161/432 nt)	20000
9282B	IS150	969836	LTEE	Ara+1	pflB	coding (810-812/2283 nt)	20000
9282B	IS150	1102032	LTEE	Ara+1	phoH	coding (756-758/1065 nt)	20000
9282B	IS150	1270660	LTEE	Ara+1	ldrC/chaA	intergenic (-167/+235)	20000
9282B	IS150	1354425	LTEE	Ara+1	sapA	coding (1053-1055/1644 nt)	20000
9282B	IS150	1462266	LTEE	Ara+1	mokB/trg	intergenic (-28/-311)	20000
9282B	IS150	1619834	LTEE	Ara+1	hokD/ECB_01533	intergenic (-71/+139)	20000
9282B	IS150	2086923	LTEE	Ara+1	yegL/yegM	intergenic (-1344/-199)	20000
9282B	IS150	2397543	LTEE	Ara+1	yfcTU	coding (1121-1123/2646 nt)	20000
9282B	IS150	3008938	LTEE	Ara+1	yeeU	coding (795/1062 nt)	20000
9282B	IS150	3697154	LTEE	Ara+1	rhsA	coding (278-280/4134 nt)	20000
9282B	IS150	3981782	LTEE	Ara+1	ECB_03710	coding (249-251/1224 nt)	20000
9282B	IS150	4275713	LTEE	Ara+1	yjcO	coding (233-235/690 nt)	20000
9282B	IS150	4415710	LTEE	Ara+1	cycA	coding (848-850/1413 nt)	20000
9282B	IS150	4615673	LTEE	Ara+1	nadR	coding (145-148/1233 nt)	20000
11331	IS150	16972	LTEE	Ara-1	mokC/nhaA	intergenic (-14/-514)	50000
11331	IS150	241691	LTEE	Ara-1	insB-2	coding (186-188/504 nt)	50000
11331	IS150	1270660	LTEE	Ara-1	ldrC/chaA	intergenic (-167/+235)	50000
11331	IS150	1733647	LTEE	Ara-1	pykF	coding (683-685/1413 nt)	50000
11331	IS150	1821525	LTEE	Ara-1	ynjI	coding (573-575/1041 nt)	50000
11331	IS150	2877312	LTEE	Ara-1	kduD	coding (565-568/762 nt)	50000
11331	IS150	3015771	LTEE	Ara-1	ECB_02816	coding (1192-1195/1677 nt)	50000
ZDB96	IS150	16990	LTEE	Ara-3	mokC/nhaA	intergenic (-32/-496)	36000
ZDB96	IS150	643362	LTEE	Ara-3	ybeF	coding (598-600/954 nt)	36000
ZDB96	IS150	1153894	LTEE	Ara-3	flgK	coding (948-950/1644 nt)	36000
ZDB96	IS150	1270660	LTEE	Ara-3	ldrC/chaA	intergenic (-167/+235)	36000
ZDB96	IS150	1451972	LTEE	Ara-3	acpD	coding (218-220/606 nt)	36000
ZDB96	IS150	1462320	LTEE	Ara-3	mokB/trg	intergenic (-82/-257)	36000
ZDB96	IS150	1729051	LTEE	Ara-3	ydhV	coding (2044-2047/2103 nt)	36000
ZDB96	IS150	1776434	LTEE	Ara-3	pheS/pheM	intergenic (-225/+56)	36000
ZDB96	IS150	2122426	LTEE	Ara-3	ECB_02013	coding (198-200/216 nt)	36000
ZDB96	IS150	2655781	LTEE	Ara-3	yfiH	coding (660-662/732 nt)	36000
ZDB96	IS150	2899615	LTEE	Ara-3	yqeB	coding (378-380/1626 nt)	36000
ZDB96	IS150	3015771	LTEE	Ara-3	ECB_02816	coding (1192-1194/1677 nt)	36000
ZDB96	IS150	3268052	LTEE	Ara-3	yhbE/rpmA	intergenic (-83/+42)	36000
ZDB96	IS150	3697154	LTEE	Ara-3	rhsA	coding (278-280/4134 nt)	36000
ZDB96	IS150	4110237	LTEE	Ara-3	metL	coding (296-298/2433 nt)	36000
ZDB96	IS150	4289281	LTEE	Ara-3	alsA	coding (521-522/1533 nt)	36000
ZDB96	IS150	4333228	LTEE	Ara-3	lysU	coding (208-210/1518 nt)	36000
ZDB96	IS150	4415710	LTEE	Ara-3	cycA	coding (848-850/1413 nt)	36000
ZDB96	IS150	4588156	LTEE	Ara-3	mdoB	coding (518-520/2292 nt)	36000
ZDB96	IS150	4613020	LTEE	Ara-3	smp/serB	intergenic (-17/-87)	36000
JEB812	IS150	1462251	MAE	JEB812	mokB/trg	intergenic (-13/-325)	13750
7181A	IS150	641158	LTEE	Ara-5	ybeM	coding (546-549/789 nt)	15000
7181A	IS150	1916292	LTEE	Ara-5	pykA	coding (68-70/1443 nt)	15000
7181A	IS150	2283472	LTEE	Ara-5	yfaA/gyrA	intergenic (-128/+19)	15000
7181A	IS150	4252526	LTEE	Ara-5	uvrA	coding (276-278/2823 nt)	15000
7181A	IS150	4567086	LTEE	Ara-5	yjiX/yjiY	intergenic (-32/+16)	15000
10450	IS150	15499	LTEE	Ara+1	insL-1	coding (57-59/1113 nt)	30000
10450	IS150	16973	LTEE	Ara+1	mokC/nhaA	intergenic (-15/-514)	30000
10450	IS150	146104	LTEE	Ara+1	yadG	coding (523-525/927 nt)	30000
10450	IS150	241692	LTEE	Ara+1	insB-2	coding (187-188/504 nt)	30000
10450	IS150	336055	LTEE	Ara+1	lacZ	coding (2805-2807/3075 nt)	30000
10450	IS150	490481	LTEE	Ara+1	ybbN/ybbO	intergenic (-34/+25)	30000
10450	IS150	589936	LTEE	Ara+1	insB-7	coding (135-138/504 nt)	30000
10450	IS150	651703	LTEE	Ara+1	ybeB/phpB	intergenic (-83/+174)	30000
10450	IS150	896463	LTEE	Ara+1	ECB_00838	coding (159-161/432 nt)	30000
10450	IS150	969836	LTEE	Ara+1	pflB	coding (810-812/2283 nt)	30000
10450	IS150	1102032	LTEE	Ara+1	phoH	coding (756-758/1065 nt)	30000
10450	IS150	1270660	LTEE	Ara+1	ldrC/chaA	intergenic (-167/+235)	30000
10450	IS150	1354425	LTEE	Ara+1	sapA	coding (1053-1055/1644 nt)	30000
10450	IS150	1462266	LTEE	Ara+1	mokB/trg	intergenic (-28/-311)	30000
10450	IS150	1521295	LTEE	Ara+1	yddG/fdnG	intergenic (-33/-253)	30000
10450	IS150	1619834	LTEE	Ara+1	hokD/ECB_01533	intergenic (-71/+139)	30000
10450	IS150	1757644	LTEE	Ara+1	ydiQ	coding (760-762/765 nt)	30000
10450	IS150	1859000	LTEE	Ara+1	yeaS	coding (336-338/639 nt)	30000
10450	IS150	2086923	LTEE	Ara+1	yegL/yegM	intergenic (-1344/-199)	30000
10450	IS150	2283472	LTEE	Ara+1	yfaA/gyrA	intergenic (-128/+19)	30000
10450	IS150	2397543	LTEE	Ara+1	yfcTU	coding (1121-1123/2646 nt)	30000
10450	IS150	2591648	LTEE	Ara+1	hcaC	coding (42-44/321 nt)	30000
10450	IS150	2655781	LTEE	Ara+1	yfiH	coding (660-662/732 nt)	30000
10450	IS150	2877313	LTEE	Ara+1	kduD	coding (565-567/762 nt)	30000
10450	IS150	3008938	LTEE	Ara+1	yeeU	coding (795/1062 nt)	30000
10450	IS150	3697154	LTEE	Ara+1	rhsA	coding (278-280/4134 nt)	30000
10450	IS150	3981782	LTEE	Ara+1	ECB_03710	coding (249-251/1224 nt)	30000
10450	IS150	4275713	LTEE	Ara+1	yjcO	coding (233-235/690 nt)	30000
10450	IS150	4415710	LTEE	Ara+1	cycA	coding (848-850/1413 nt)	30000
10450	IS150	4615673	LTEE	Ara+1	nadR	coding (145-148/1233 nt)	30000
11036	IS150	16972	LTEE	Ara-2	mokC/nhaA	intergenic (-14/-514)	40000
11036	IS150	1270648	LTEE	Ara-2	ldrC/chaA	intergenic (-155/+239)	40000
11036	IS150	1462251	LTEE	Ara-2	mokB/trg	intergenic (-13/-326)	40000
11036	IS150	1989703	LTEE	Ara-2	yeeJ	coding (6842-6844/7152 nt)	40000
11036	IS150	2869830	LTEE	Ara-2	aas	coding (803-805/2160 nt)	40000
11036	IS150	2899617	LTEE	Ara-2	yqeB	coding (376-378/1626 nt)	40000
11036	IS150	2950664	LTEE	Ara-2	ygfH	coding (112-114/1479 nt)	40000
11036	IS150	3015256	LTEE	Ara-2	ECB_02816	coding (677/1677 nt)	40000
11036	IS150	3244192	LTEE	Ara-2	nlpI/pnp	intergenic (-34/+69)	40000
11036	IS150	3730385	LTEE	Ara-2	yibD	coding (461-463/1035 nt)	40000
11036	IS150	4252523	LTEE	Ara-2	uvrA	coding (279-281/2823 nt)	40000
11036	IS150	4415710	LTEE	Ara-2	cycA	coding (848-851/1413 nt)	40000
ZDB27	IS150	16990	LTEE	Ara-3	mokC/nhaA	intergenic (-32/-496)	31500
ZDB27	IS150	643362	LTEE	Ara-3	ybeF	coding (598-600/954 nt)	31500
ZDB27	IS150	1087133	LTEE	Ara-3	ycdI	coding (105-107/591 nt)	31500
ZDB27	IS150	1270660	LTEE	Ara-3	ldrC/chaA	intergenic (-167/+235)	31500
ZDB27	IS150	1451972	LTEE	Ara-3	acpD	coding (218-220/606 nt)	31500
ZDB27	IS150	1462320	LTEE	Ara-3	mokB/trg	intergenic (-82/-257)	31500
ZDB27	IS150	1729051	LTEE	Ara-3	ydhV	coding (2044-2047/2103 nt)	31500
ZDB27	IS150	1776434	LTEE	Ara-3	pheS/pheM	intergenic (-225/+56)	31500
ZDB27	IS150	2122426	LTEE	Ara-3	ECB_02013	coding (198-200/216 nt)	31500
ZDB27	IS150	2655781	LTEE	Ara-3	yfiH	coding (660-662/732 nt)	31500
ZDB27	IS150	2899615	LTEE	Ara-3	yqeB	coding (378-380/1626 nt)	31500
ZDB27	IS150	3015771	LTEE	Ara-3	ECB_02816	coding (1192-1194/1677 nt)	31500
ZDB27	IS150	3244197	LTEE	Ara-3	nlpI/pnp	intergenic (-39/+68)	31500
ZDB27	IS150	3268052	LTEE	Ara-3	yhbE/rpmA	intergenic (-83/+42)	31500
ZDB27	IS150	3522705	LTEE	Ara-3	ugpB	coding (295-297/1317 nt)	31500
ZDB27	IS150	3697154	LTEE	Ara-3	rhsA	coding (278-280/4134 nt)	31500
ZDB27	IS150	4110237	LTEE	Ara-3	metL	coding (296-298/2433 nt)	31500
ZDB27	IS150	4333228	LTEE	Ara-3	lysU	coding (208-210/1518 nt)	31500
ZDB27	IS150	4415710	LTEE	Ara-3	cycA	coding (848-850/1413 nt)	31500
ZDB27	IS150	4435950	LTEE	Ara-3	ytfT	coding (127-130/1023 nt)	31500
ZDB27	IS150	4613020	LTEE	Ara-3	smp/serB	intergenic (-17/-87)	31500
11371	IS150	1462251	LTEE	Ara+6	mokB/trg	intergenic (-13/-326)	50000
CZB199	IS150	16990	LTEE	Ara-3	mokC/nhaA	intergenic (-32/-496)	33000
CZB199	IS150	1162790	LTEE	Ara-3	plsX	coding (601-603/1071 nt)	33000
CZB199	IS150	1270660	LTEE	Ara-3	ldrC/chaA	intergenic (-167/+235)	33000
CZB199	IS150	1462320	LTEE	Ara-3	mokB/trg	intergenic (-82/-257)	33000
CZB199	IS150	3015771	LTEE	Ara-3	ECB_02816	coding (1192-1194/1677 nt)	33000
CZB199	IS150	3454491	LTEE	Ara-3	yrfE	coding (342-343/561 nt)	33000
CZB199	IS150	4110237	LTEE	Ara-3	metL	coding (296-298/2433 nt)	33000
CZB199	IS150	4613020	LTEE	Ara-3	smp/serB	intergenic (-17/-87)	33000
11389	IS150	16972	LTEE	Ara-6	mokC/nhaA	intergenic (-14/-514)	50000
11389	IS150	146998	LTEE	Ara-6	yadH	coding (494-496/771 nt)	50000
11389	IS150	315207	LTEE	Ara-6	yahJ/yahK	intergenic (+51/-322)	50000
11389	IS150	590896	LTEE	Ara-6	insL-3	coding (125-127/1113 nt)	50000
11389	IS150	1101850	LTEE	Ara-6	phoH	coding (574-576/1065 nt)	50000
11389	IS150	1136030	LTEE	Ara-6	dinI	coding (28-30/246 nt)	50000
11389	IS150	1270660	LTEE	Ara-6	ldrC/chaA	intergenic (-167/+235)	50000
11389	IS150	1462253	LTEE	Ara-6	mokB/trg	intergenic (-15/-326)	50000
11389	IS150	1515685	LTEE	Ara-6	narZ	coding (1055-1057/3741 nt)	50000
11389	IS150	1859000	LTEE	Ara-6	yeaS	coding (336-338/639 nt)	50000
11389	IS150	1988481	LTEE	Ara-6	yeeJ	coding (5620-5622/7152 nt)	50000
11389	IS150	2397543	LTEE	Ara-6	yfcTU	coding (1121-1123/2646 nt)	50000
11389	IS150	2570965	LTEE	Ara-6	yfhM	coding (2140-2142/4962 nt)	50000
11389	IS150	2655781	LTEE	Ara-6	yfiH	coding (660-662/732 nt)	50000
11389	IS150	3015771	LTEE	Ara-6	ECB_02816	coding (1192-1194/1677 nt)	50000
11389	IS150	3143448	LTEE	Ara-6	ygjD/rpsU	intergenic (-88/-148)	50000
11389	IS150	3713694	LTEE	Ara-6	ECB_03460	coding (704-706/4851 nt)	50000
11389	IS150	4453625	LTEE	Ara-6	mgtA/yjgF	intergenic (+27/+177)	50000
ZDB143	IS150	16990	LTEE	Ara-3	mokC/nhaA	intergenic (-32/-496)	32500
ZDB143	IS150	643362	LTEE	Ara-3	ybeF	coding (598-600/954 nt)	32500
ZDB143	IS150	1270660	LTEE	Ara-3	ldrC/chaA	intergenic (-167/+235)	32500
ZDB143	IS150	1451972	LTEE	Ara-3	acpD	coding (218-220/606 nt)	32500
ZDB143	IS150	1462320	LTEE	Ara-3	mokB/trg	intergenic (-82/-257)	32500
ZDB143	IS150	1729051	LTEE	Ara-3	ydhV	coding (2044-2047/2103 nt)	32500
ZDB143	IS150	1776434	LTEE	Ara-3	pheS/pheM	intergenic (-225/+56)	32500
ZDB143	IS150	2122426	LTEE	Ara-3	ECB_02013	coding (198-200/216 nt)	32500
ZDB143	IS150	2655781	LTEE	Ara-3	yfiH	coding (660-662/732 nt)	32500
ZDB143	IS150	2877313	LTEE	Ara-3	kduD	coding (565-567/762 nt)	32500
ZDB143	IS150	2899615	LTEE	Ara-3	yqeB	coding (378-380/1626 nt)	32500
ZDB143	IS150	3015771	LTEE	Ara-3	ECB_02816	coding (1192-1194/1677 nt)	32500
ZDB143	IS150	3268052	LTEE	Ara-3	yhbE/rpmA	intergenic (-83/+42)	32500
ZDB143	IS150	3697154	LTEE	Ara-3	rhsA	coding (278-280/4134 nt)	32500
ZDB143	IS150	4110237	LTEE	Ara-3	metL	coding (296-298/2433 nt)	32500
ZDB143	IS150	4252526	LTEE	Ara-3	uvrA	coding (276-278/2823 nt)	32500
ZDB143	IS150	4415710	LTEE	Ara-3	cycA	coding (848-850/1413 nt)	32500
ZDB143	IS150	4613020	LTEE	Ara-3	smp/serB	intergenic (-17/-87)	32500
ZDB409	IS150	16990	LTEE	Ara-3	mokC/nhaA	intergenic (-32/-496)	5000
ZDB409	IS150	1101970	LTEE	Ara-3	phoH	coding (694-696/1065 nt)	5000
ZDB409	IS150	1136032	LTEE	Ara-3	dinI	coding (26-28/246 nt)	5000
ZDB409	IS150	1462266	LTEE	Ara-3	mokB/trg	intergenic (-28/-311)	5000
ZDB409	IS150	2405654	LTEE	Ara-3	fadL	coding (691-693/1347 nt)	5000
ZDB409	IS150	4613020	LTEE	Ara-3	smp/serB	intergenic (-17/-87)	5000
11830	IS150	1270041	LTEE	Ara-2	ldrB/ldrC	intergenic (-83/+344)	20000
11830	IS150	1462251	LTEE	Ara-2	mokB/trg	intergenic (-13/-326)	20000
11830	IS150	2899617	LTEE	Ara-2	yqeB	coding (376-378/1626 nt)	20000
7184A	IS150	2899615	LTEE	Ara+2	yqeB	coding (378-380/1626 nt)	15000
1159B	IS150	2122426	LTEE	Ara+2	ECB_02013	coding (198-200/216 nt)	2000
1066B	IS150	92424	LTEE	Ara+5	fruR/yabB	intergenic (+588/-11)	1500
7177B	IS150	16972	LTEE	Ara-1	mokC/nhaA	intergenic (-14/-514)	15000
7177B	IS150	241691	LTEE	Ara-1	insB-2	coding (186-188/504 nt)	15000
7177B	IS150	1733647	LTEE	Ara-1	pykF	coding (683-685/1413 nt)	15000
7177B	IS150	1821525	LTEE	Ara-1	ynjI	coding (573-575/1041 nt)	15000
966A	IS150	92876	LTEE	Ara-3	yabB	coding (439-441/459 nt)	1000
966A	IS150	1733141	LTEE	Ara-3	pykF	coding (177-179/1413 nt)	1000
1160B	IS150	241691	LTEE	Ara+3	insB-2	coding (186-188/504 nt)	2000
1160B	IS150	2020131	LTEE	Ara+3	hisL/hisG	intergenic (+83/-61)	2000
8602B	IS150	1270125	LTEE	Ara+3	ldrB/ldrC	intergenic (-167/+258)	20000
ZDB425	IS150	16990	LTEE	Ara-3	mokC/nhaA	intergenic (-32/-496)	10000
ZDB425	IS150	1270660	LTEE	Ara-3	ldrC/chaA	intergenic (-167/+235)	10000
ZDB425	IS150	1462320	LTEE	Ara-3	mokB/trg	intergenic (-82/-257)	10000
ZDB425	IS150	4110237	LTEE	Ara-3	metL	coding (296-298/2433 nt)	10000
ZDB425	IS150	4613020	LTEE	Ara-3	smp/serB	intergenic (-17/-87)	10000
2173B	IS150	241641	LTEE	Ara+1	insB-2	coding (136-138/504 nt)	5000
2173B	IS150	651703	LTEE	Ara+1	ybeB/phpB	intergenic (-83/+174)	5000
2173B	IS150	1101309	LTEE	Ara+1	phoH	coding (33-35/1065 nt)	5000
2173B	IS150	1270660	LTEE	Ara+1	ldrC/chaA	intergenic (-167/+235)	5000
2173B	IS150	1462266	LTEE	Ara+1	mokB/trg	intergenic (-28/-311)	5000
2173B	IS150	1821484	LTEE	Ara+1	ynjI	coding (616/1041 nt)	5000
2173B	IS150	2087494	LTEE	Ara+1	yegM	coding (371-373/1248 nt)	5000
2173B	IS150	3044715	LTEE	Ara+1	yghJ	coding (1287-1289/4554 nt)	5000
2173B	IS150	3697154	LTEE	Ara+1	rhsA	coding (278-280/4134 nt)	5000
2173B	IS150	4615673	LTEE	Ara+1	nadR	coding (145-148/1233 nt)	5000
11365	IS150	16990	LTEE	Ara-3	mokC/nhaA	intergenic (-32/-496)	50000
11365	IS150	643362	LTEE	Ara-3	ybeF	coding (598-600/954 nt)	50000
11365	IS150	1153894	LTEE	Ara-3	flgK	coding (948-950/1644 nt)	50000
11365	IS150	1270660	LTEE	Ara-3	ldrC/chaA	intergenic (-167/+235)	50000
11365	IS150	1451972	LTEE	Ara-3	acpD	coding (218-220/606 nt)	50000
11365	IS150	1462320	LTEE	Ara-3	mokB/trg	intergenic (-82/-257)	50000
11365	IS150	1619926	LTEE	Ara-3	hokD/ECB_01533	intergenic (-163/+47)	50000
11365	IS150	1729051	LTEE	Ara-3	ydhV	coding (2044-2047/2103 nt)	50000
11365	IS150	1776434	LTEE	Ara-3	pheS/pheM	intergenic (-225/+56)	50000
11365	IS150	2122426	LTEE	Ara-3	ECB_02013	coding (198-200/216 nt)	50000
11365	IS150	2655781	LTEE	Ara-3	yfiH	coding (660-662/732 nt)	50000
11365	IS150	2877313	LTEE	Ara-3	kduD	coding (565-567/762 nt)	50000
11365	IS150	2899615	LTEE	Ara-3	yqeB	coding (378-380/1626 nt)	50000
11365	IS150	3015771	LTEE	Ara-3	ECB_02816	coding (1192-1194/1677 nt)	50000
11365	IS150	3192744	LTEE	Ara-3	tdcG/tdcF	intergenic (-61/+8)	50000
11365	IS150	3268052	LTEE	Ara-3	yhbE/rpmA	intergenic (-83/+42)	50000
11365	IS150	3680780	LTEE	Ara-3	sgbE	coding (239-241/696 nt)	50000
11365	IS150	3697154	LTEE	Ara-3	rhsA	coding (278-280/4134 nt)	50000
11365	IS150	4110237	LTEE	Ara-3	metL	coding (296-298/2433 nt)	50000
11365	IS150	4289282	LTEE	Ara-3	alsA	coding (519-521/1533 nt)	50000
11365	IS150	4415710	LTEE	Ara-3	cycA	coding (848-850/1413 nt)	50000
11365	IS150	4446816	LTEE	Ara-3	treC	coding (1171/1656 nt)	50000
11365	IS150	4588156	LTEE	Ara-3	mdoB	coding (518-520/2292 nt)	50000
11365	IS150	4613020	LTEE	Ara-3	smp/serB	intergenic (-17/-87)	50000
ZDB357	IS150	15499	LTEE	Ara-3	insL-1	coding (57-59/1113 nt)	30000
ZDB357	IS150	16990	LTEE	Ara-3	mokC/nhaA	intergenic (-32/-496)	30000
ZDB357	IS150	23675	LTEE	Ara-3	insB-1	coding (136-138/504 nt)	30000
ZDB357	IS150	643362	LTEE	Ara-3	ybeF	coding (598-600/954 nt)	30000
ZDB357	IS150	1270660	LTEE	Ara-3	ldrC/chaA	intergenic (-167/+235)	30000
ZDB357	IS150	1462320	LTEE	Ara-3	mokB/trg	intergenic (-82/-257)	30000
ZDB357	IS150	1776434	LTEE	Ara-3	pheS/pheM	intergenic (-225/+56)	30000
ZDB357	IS150	2122426	LTEE	Ara-3	ECB_02013	coding (198-200/216 nt)	30000
ZDB357	IS150	3015771	LTEE	Ara-3	ECB_02816	coding (1192-1194/1677 nt)	30000
ZDB357	IS150	3268052	LTEE	Ara-3	yhbE/rpmA	intergenic (-83/+42)	30000
ZDB357	IS150	3550158	LTEE	Ara-3	rhsB	coding (279-280/4236 nt)	30000
ZDB357	IS150	3697154	LTEE	Ara-3	rhsA	coding (278-280/4134 nt)	30000
ZDB357	IS150	4110237	LTEE	Ara-3	metL	coding (296-298/2433 nt)	30000
ZDB357	IS150	4415710	LTEE	Ara-3	cycA	coding (848-850/1413 nt)	30000
ZDB357	IS150	4613020	LTEE	Ara-3	smp/serB	intergenic (-17/-87)	30000
10404	IS150	16975	LTEE	Ara-5	mokC/nhaA	intergenic (-17/-499)	30000
10404	IS150	235476	LTEE	Ara-5	yafE/mltD	intergenic (+3/+43)	30000
10404	IS150	241691	LTEE	Ara-5	insB-2	coding (186-188/504 nt)	30000
10404	IS150	574495	LTEE	Ara-5	cusS	coding (1179/1449 nt)	30000
10404	IS150	680761	LTEE	Ara-5	asnB	coding (510-512/1665 nt)	30000
10404	IS150	968326	LTEE	Ara-5	pflA/pflB	intergenic (-153/+37)	30000
10404	IS150	1136032	LTEE	Ara-5	dinI	coding (26-28/246 nt)	30000
10404	IS150	1270661	LTEE	Ara-5	ldrC/chaA	intergenic (-168/+235)	30000
10404	IS150	1451972	LTEE	Ara-5	acpD	coding (218-220/606 nt)	30000
10404	IS150	1462251	LTEE	Ara-5	mokB/trg	intergenic (-13/-326)	30000
10404	IS150	1525134	LTEE	Ara-5	fdnH	coding (524/885 nt)	30000
10404	IS150	1570019	LTEE	Ara-5	ydeU	pseudogene (612-614/1401 nt)	30000
10404	IS150	1733527	LTEE	Ara-5	pykF	coding (563/1413 nt)	30000
10404	IS150	1805353	LTEE	Ara-5	astB	coding (171-172/1344 nt)	30000
10404	IS150	1821484	LTEE	Ara-5	ynjI	coding (616/1041 nt)	30000
10404	IS150	2122428	LTEE	Ara-5	ECB_02013	coding (196-198/216 nt)	30000
10404	IS150	2157881	LTEE	Ara-5	yehM	coding (991-993/2280 nt)	30000
10404	IS150	2196657	LTEE	Ara-5	cirA	coding (1351/1992 nt)	30000
10404	IS150	2877316	LTEE	Ara-5	kduD	coding (552-564/762 nt)	30000
10404	IS150	2899615	LTEE	Ara-5	yqeB	coding (378-380/1626 nt)	30000
10404	IS150	3001285	LTEE	Ara-5	flu	coding (1722-1724/2847 nt)	30000
10404	IS150	3015773	LTEE	Ara-5	ECB_02816	coding (1194/1677 nt)	30000
10404	IS150	3255526	LTEE	Ara-5	yhbX	coding (1320-1322/1626 nt)	30000
10404	IS150	3542565	LTEE	Ara-5	yhhT	coding (13-16/1050 nt)	30000
10404	IS150	3583860	LTEE	Ara-5	slp	coding (409/567 nt)	30000
10404	IS150	3686019	LTEE	Ara-5	yiaT	coding (543/741 nt)	30000
10404	IS150	3986904	LTEE	Ara-5	ECB_03715	coding (443-445/861 nt)	30000
10404	IS150	4102859	LTEE	Ara-5	ftsN/cytR	intergenic (-37/+52)	30000
10404	IS150	4399113	LTEE	Ara-5	ulaA	coding (979-981/1398 nt)	30000
ZDB19	IS150	16990	LTEE	Ara-3	mokC/nhaA	intergenic (-32/-496)	30500
ZDB19	IS150	643362	LTEE	Ara-3	ybeF	coding (598-600/954 nt)	30500
ZDB19	IS150	1270660	LTEE	Ara-3	ldrC/chaA	intergenic (-167/+235)	30500
ZDB19	IS150	1451972	LTEE	Ara-3	acpD	coding (218-220/606 nt)	30500
ZDB19	IS150	1462320	LTEE	Ara-3	mokB/trg	intergenic (-82/-257)	30500
ZDB19	IS150	1729051	LTEE	Ara-3	ydhV	coding (2044-2047/2103 nt)	30500
ZDB19	IS150	1776434	LTEE	Ara-3	pheS/pheM	intergenic (-225/+56)	30500
ZDB19	IS150	2122426	LTEE	Ara-3	ECB_02013	coding (198-200/216 nt)	30500
ZDB19	IS150	2157881	LTEE	Ara-3	yehM	coding (991-993/2280 nt)	30500
ZDB19	IS150	2655781	LTEE	Ara-3	yfiH	coding (660-662/732 nt)	30500
ZDB19	IS150	3015771	LTEE	Ara-3	ECB_02816	coding (1192-1194/1677 nt)	30500
ZDB19	IS150	3268052	LTEE	Ara-3	yhbE/rpmA	intergenic (-83/+42)	30500
ZDB19	IS150	3542565	LTEE	Ara-3	yhhT	coding (13-16/1050 nt)	30500
ZDB19	IS150	3697154	LTEE	Ara-3	rhsA	coding (278-280/4134 nt)	30500
ZDB19	IS150	4110237	LTEE	Ara-3	metL	coding (296-298/2433 nt)	30500
ZDB19	IS150	4415710	LTEE	Ara-3	cycA	coding (848-850/1413 nt)	30500
ZDB19	IS150	4613020	LTEE	Ara-3	smp/serB	intergenic (-17/-87)	30500
11009	IS150	16973	LTEE	Ara+1	mokC/nhaA	intergenic (-15/-514)	40000
11009	IS150	183262	LTEE	Ara+1	dgt	coding (1184-1186/1518 nt)	40000
11009	IS150	336055	LTEE	Ara+1	lacZ	coding (2805-2807/3075 nt)	40000
11009	IS150	471785	LTEE	Ara+1	aes	coding (254-256/960 nt)	40000
11009	IS150	490481	LTEE	Ara+1	ybbN/ybbO	intergenic (-34/+25)	40000
11009	IS150	589936	LTEE	Ara+1	insB-7	coding (135-138/504 nt)	40000
11009	IS150	651703	LTEE	Ara+1	ybeB/phpB	intergenic (-83/+174)	40000
11009	IS150	670103	LTEE	Ara+1	ECB_00624	coding (670-673/1878 nt)	40000
11009	IS150	896463	LTEE	Ara+1	ECB_00838	coding (159-161/432 nt)	40000
11009	IS150	969836	LTEE	Ara+1	pflB	coding (810-812/2283 nt)	40000
11009	IS150	1037783	LTEE	Ara+1	sulA	coding (227-228/510 nt)	40000
11009	IS150	1102032	LTEE	Ara+1	phoH	coding (756-758/1065 nt)	40000
11009	IS150	1218697	LTEE	Ara+1	ycgG	coding (1209-1211/1524 nt)	40000
11009	IS150	1270660	LTEE	Ara+1	ldrC/chaA	intergenic (-167/+235)	40000
11009	IS150	1305418	LTEE	Ara+1	cls	coding (820-822/1461 nt)	40000
11009	IS150	1354425	LTEE	Ara+1	sapA	coding (1053-1055/1644 nt)	40000
11009	IS150	1462266	LTEE	Ara+1	mokB/trg	intergenic (-28/-311)	40000
11009	IS150	1619834	LTEE	Ara+1	hokD/ECB_01533	intergenic (-71/+139)	40000
11009	IS150	2086923	LTEE	Ara+1	yegL/yegM	intergenic (-1344/-199)	40000
11009	IS150	2196656	LTEE	Ara+1	cirA	coding (1350-1352/1992 nt)	40000
11009	IS150	2397543	LTEE	Ara+1	yfcTU	coding (1121-1123/2646 nt)	40000
11009	IS150	2655781	LTEE	Ara+1	yfiH	coding (660-662/732 nt)	40000
11009	IS150	3008938	LTEE	Ara+1	yeeU	coding (795/1062 nt)	40000
11009	IS150	3270443	LTEE	Ara+1	nlp/murA	intergenic (+21/+24)	40000
11009	IS150	3537175	LTEE	Ara+1	zntA	coding (37-39/2199 nt)	40000
11009	IS150	3697154	LTEE	Ara+1	rhsA	coding (278-280/4134 nt)	40000
11009	IS150	3841192	LTEE	Ara+1	recF	coding (389-391/1074 nt)	40000
11009	IS150	3981782	LTEE	Ara+1	ECB_03710	coding (249-251/1224 nt)	40000
11009	IS150	4049580	LTEE	Ara+1	yihS	coding (322-324/1242 nt)	40000
11009	IS150	4275713	LTEE	Ara+1	yjcO	coding (233-235/690 nt)	40000
11009	IS150	4415710	LTEE	Ara+1	cycA	coding (848-850/1413 nt)	40000
11009	IS150	4615673	LTEE	Ara+1	nadR	coding (145-148/1233 nt)	40000
2177B	IS150	3080114	LTEE	Ara+5	hybO	pseudogene (119-121/1005 nt)	5000
2177B	IS150	3270443	LTEE	Ara+5	nlp/murA	intergenic (+21/+24)	5000
4541B	IS150	16973	LTEE	Ara-6	mokC/nhaA	intergenic (-15/-512)	10000
4541B	IS150	3015771	LTEE	Ara-6	ECB_02816	coding (1192-1194/1677 nt)	10000
4541B	IS150	3143448	LTEE	Ara-6	ygjD/rpsU	intergenic (-88/-148)	10000
ZDB99	IS150	16990	LTEE	Ara-3	mokC/nhaA	intergenic (-32/-496)	36000
ZDB99	IS150	23675	LTEE	Ara-3	insB-1	coding (136-138/504 nt)	36000
ZDB99	IS150	643362	LTEE	Ara-3	ybeF	coding (598-600/954 nt)	36000
ZDB99	IS150	931315	LTEE	Ara-3	ybjE	coding (250/900 nt)	36000
ZDB99	IS150	968701	LTEE	Ara-3	pflB	coding (1945-1947/2283 nt)	36000
ZDB99	IS150	1270660	LTEE	Ara-3	ldrC/chaA	intergenic (-167/+235)	36000
ZDB99	IS150	1462320	LTEE	Ara-3	mokB/trg	intergenic (-82/-257)	36000
ZDB99	IS150	1776434	LTEE	Ara-3	pheS/pheM	intergenic (-225/+56)	36000
ZDB99	IS150	1981795	LTEE	Ara-3	yeeI	coding (146-148/798 nt)	36000
ZDB99	IS150	2122426	LTEE	Ara-3	ECB_02013	coding (198-200/216 nt)	36000
ZDB99	IS150	2191174	LTEE	Ara-3	mglB	coding (411-413/999 nt)	36000
ZDB99	IS150	2551327	LTEE	Ara-3	yfgI	coding (183-185/540 nt)	36000
ZDB99	IS150	2876523	LTEE	Ara-3	araE	coding (278-281/1419 nt)	36000
ZDB99	IS150	2899574	LTEE	Ara-3	yqeB	coding (419-421/1626 nt)	36000
ZDB99	IS150	3015771	LTEE	Ara-3	ECB_02816	coding (1192-1194/1677 nt)	36000
ZDB99	IS150	3268052	LTEE	Ara-3	yhbE/rpmA	intergenic (-83/+42)	36000
ZDB99	IS150	3435104	LTEE	Ara-3	yhfT	coding (913-915/1305 nt)	36000
ZDB99	IS150	3535848	LTEE	Ara-3	yhhL	coding (182-184/270 nt)	36000
ZDB99	IS150	3697154	LTEE	Ara-3	rhsA	coding (278-280/4134 nt)	36000
ZDB99	IS150	4110237	LTEE	Ara-3	metL	coding (296-298/2433 nt)	36000
ZDB99	IS150	4613020	LTEE	Ara-3	smp/serB	intergenic (-17/-87)	36000
ZDB158	IS150	16990	LTEE	Ara-3	mokC/nhaA	intergenic (-32/-496)	32500
ZDB158	IS150	23675	LTEE	Ara-3	insB-1	coding (136-138/504 nt)	32500
ZDB158	IS150	430729	LTEE	Ara-3	insL-2	coding (57-59/1113 nt)	32500
ZDB158	IS150	643362	LTEE	Ara-3	ybeF	coding (598-600/954 nt)	32500
ZDB158	IS150	1270660	LTEE	Ara-3	ldrC/chaA	intergenic (-167/+235)	32500
ZDB158	IS150	1462320	LTEE	Ara-3	mokB/trg	intergenic (-82/-257)	32500
ZDB158	IS150	1776434	LTEE	Ara-3	pheS/pheM	intergenic (-225/+56)	32500
ZDB158	IS150	2122426	LTEE	Ara-3	ECB_02013	coding (198-200/216 nt)	32500
ZDB158	IS150	3015771	LTEE	Ara-3	ECB_02816	coding (1192-1194/1677 nt)	32500
ZDB158	IS150	3268052	LTEE	Ara-3	yhbE/rpmA	intergenic (-83/+42)	32500
ZDB158	IS150	3697154	LTEE	Ara-3	rhsA	coding (278-280/4134 nt)	32500
ZDB158	IS150	4110237	LTEE	Ara-3	metL	coding (296-298/2433 nt)	32500
ZDB158	IS150	4415710	LTEE	Ara-3	cycA	coding (848-850/1413 nt)	32500
ZDB158	IS150	4613020	LTEE	Ara-3	smp/serB	intergenic (-17/-87)	32500
1072B	IS150	4252526	LTEE	Ara-5	uvrA	coding (276-278/2823 nt)	1500
ZDB14	IS150	16990	LTEE	Ara-3	mokC/nhaA	intergenic (-32/-496)	29000
ZDB14	IS150	643362	LTEE	Ara-3	ybeF	coding (598-600/954 nt)	29000
ZDB14	IS150	1270660	LTEE	Ara-3	ldrC/chaA	intergenic (-167/+235)	29000
ZDB14	IS150	1451972	LTEE	Ara-3	acpD	coding (218-220/606 nt)	29000
ZDB14	IS150	1462320	LTEE	Ara-3	mokB/trg	intergenic (-82/-257)	29000
ZDB14	IS150	1623001	LTEE	Ara-3	ydfX	coding (193-195/462 nt)	29000
ZDB14	IS150	1729051	LTEE	Ara-3	ydhV	coding (2044-2047/2103 nt)	29000
ZDB14	IS150	1776434	LTEE	Ara-3	pheS/pheM	intergenic (-225/+56)	29000
ZDB14	IS150	2122426	LTEE	Ara-3	ECB_02013	coding (198-200/216 nt)	29000
ZDB14	IS150	2154223	LTEE	Ara-3	yehI	coding (2749-2751/3633 nt)	29000
ZDB14	IS150	2288897	LTEE	Ara-3	yfaL	coding (1971-1973/3753 nt)	29000
ZDB14	IS150	3015771	LTEE	Ara-3	ECB_02816	coding (1192-1194/1677 nt)	29000
ZDB14	IS150	3268052	LTEE	Ara-3	yhbE/rpmA	intergenic (-83/+42)	29000
ZDB14	IS150	3697154	LTEE	Ara-3	rhsA	coding (278-280/4134 nt)	29000
ZDB14	IS150	4110237	LTEE	Ara-3	metL	coding (296-298/2433 nt)	29000
ZDB14	IS150	4613020	LTEE	Ara-3	smp/serB	intergenic (-17/-87)	29000
10986	IS150	1462251	LTEE	Ara+6	mokB/trg	intergenic (-13/-326)	40000
10986	IS150	2830450	LTEE	Ara+6	fucI	coding (248-251/1776 nt)	40000
10986	IS150	3864800	LTEE	Ara+6	bglF	coding (1163-1166/1878 nt)	40000
10410	IS150	1270125	LTEE	Ara+3	ldrB/ldrC	intergenic (-167/+258)	30000
ZDB486	IS150	16990	LTEE	Ara-3	mokC/nhaA	intergenic (-32/-496)	25000
ZDB486	IS150	643362	LTEE	Ara-3	ybeF	coding (598-600/954 nt)	25000
ZDB486	IS150	1270660	LTEE	Ara-3	ldrC/chaA	intergenic (-167/+235)	25000
ZDB486	IS150	1451972	LTEE	Ara-3	acpD	coding (218-220/606 nt)	25000
ZDB486	IS150	1462320	LTEE	Ara-3	mokB/trg	intergenic (-82/-257)	25000
ZDB486	IS150	1729051	LTEE	Ara-3	ydhV	coding (2044-2047/2103 nt)	25000
ZDB486	IS150	1776434	LTEE	Ara-3	pheS/pheM	intergenic (-225/+56)	25000
ZDB486	IS150	2122426	LTEE	Ara-3	ECB_02013	coding (198-200/216 nt)	25000
ZDB486	IS150	3015771	LTEE	Ara-3	ECB_02816	coding (1192-1194/1677 nt)	25000
ZDB486	IS150	3268052	LTEE	Ara-3	yhbE/rpmA	intergenic (-83/+42)	25000
ZDB486	IS150	3697154	LTEE	Ara-3	rhsA	coding (278-280/4134 nt)	25000
ZDB486	IS150	4110237	LTEE	Ara-3	metL	coding (296-298/2433 nt)	25000
ZDB486	IS150	4613020	LTEE	Ara-3	smp/serB	intergenic (-17/-87)	25000
770B	IS150	1781240	LTEE	Ara+3	arpB	pseudogene (398-400/1416 nt)	500
4532B	IS150	16972	LTEE	Ara+3	mokC/nhaA	intergenic (-14/-514)	10000
4532B	IS150	1270125	LTEE	Ara+3	ldrB/ldrC	intergenic (-167/+258)	10000
4532B	IS150	3841192	LTEE	Ara+3	recF	coding (389-391/1074 nt)	10000
7186A	IS150	3015771	LTEE	Ara+4	ECB_02816	coding (1192-1194/1677 nt)	15000
ZDB339	IS150	16990	LTEE	Ara-3	mokC/nhaA	intergenic (-32/-496)	28000
ZDB339	IS150	643362	LTEE	Ara-3	ybeF	coding (598-600/954 nt)	28000
ZDB339	IS150	1270660	LTEE	Ara-3	ldrC/chaA	intergenic (-167/+235)	28000
ZDB339	IS150	1451972	LTEE	Ara-3	acpD	coding (218-220/606 nt)	28000
ZDB339	IS150	1462320	LTEE	Ara-3	mokB/trg	intergenic (-82/-257)	28000
ZDB339	IS150	1729051	LTEE	Ara-3	ydhV	coding (2044-2047/2103 nt)	28000
ZDB339	IS150	1776434	LTEE	Ara-3	pheS/pheM	intergenic (-225/+56)	28000
ZDB339	IS150	2122426	LTEE	Ara-3	ECB_02013	coding (198-200/216 nt)	28000
ZDB339	IS150	3015771	LTEE	Ara-3	ECB_02816	coding (1192-1194/1677 nt)	28000
ZDB339	IS150	3268052	LTEE	Ara-3	yhbE/rpmA	intergenic (-83/+42)	28000
ZDB339	IS150	3697154	LTEE	Ara-3	rhsA	coding (278-280/4134 nt)	28000
ZDB339	IS150	4049580	LTEE	Ara-3	yihS	coding (322-324/1242 nt)	28000
ZDB339	IS150	4110237	LTEE	Ara-3	metL	coding (296-298/2433 nt)	28000
ZDB339	IS150	4613020	LTEE	Ara-3	smp/serB	intergenic (-17/-87)	28000
11335	IS150	16972	LTEE	Ara-2	mokC/nhaA	intergenic (-14/-514)	50000
11335	IS150	471785	LTEE	Ara-2	aes	coding (254-256/960 nt)	50000
11335	IS150	1298715	LTEE	Ara-2	ychE/oppA	intergenic (+677/-59)	50000
11335	IS150	1462251	LTEE	Ara-2	mokB/trg	intergenic (-13/-326)	50000
11335	IS150	1880159	LTEE	Ara-2	yoaE	coding (6/1557 nt)	50000
11335	IS150	2749287	LTEE	Ara-2	fhlA	coding (90-92/2079 nt)	50000
11335	IS150	2869830	LTEE	Ara-2	aas	coding (803-805/2160 nt)	50000
11335	IS150	2899617	LTEE	Ara-2	yqeB	coding (376-378/1626 nt)	50000
11335	IS150	2950664	LTEE	Ara-2	ygfH	coding (112-114/1479 nt)	50000
11335	IS150	2950667	LTEE	Ara-2	ygfH	coding (115/1479 nt)	50000
11335	IS150	3000709	LTEE	Ara-2	flu	coding (1146/2847 nt)	50000
11335	IS150	3244192	LTEE	Ara-2	nlpI/pnp	intergenic (-34/+69)	50000
11335	IS150	3527564	LTEE	Ara-2	livK	coding (669-671/1110 nt)	50000
11335	IS150	3637138	LTEE	Ara-2	dppA	coding (1024-1026/1608 nt)	50000
11335	IS150	3697154	LTEE	Ara-2	rhsA	coding (278-280/4134 nt)	50000
11335	IS150	4140651	LTEE	Ara-2	[udhA]	NA	50000
7182A	IS150	2877313	LTEE	Ara-6	kduD	coding (565-567/762 nt)	15000
7182A	IS150	3015771	LTEE	Ara-6	ECB_02816	coding (1192-1194/1677 nt)	15000
7182A	IS150	3143448	LTEE	Ara-6	ygjD/rpsU	intergenic (-88/-148)	15000
ZDB309	IS150	16990	LTEE	Ara-3	mokC/nhaA	intergenic (-32/-496)	27000
ZDB309	IS150	643362	LTEE	Ara-3	ybeF	coding (598-600/954 nt)	27000
ZDB309	IS150	1270660	LTEE	Ara-3	ldrC/chaA	intergenic (-167/+235)	27000
ZDB309	IS150	1451972	LTEE	Ara-3	acpD	coding (218-220/606 nt)	27000
ZDB309	IS150	1462320	LTEE	Ara-3	mokB/trg	intergenic (-82/-257)	27000
ZDB309	IS150	1729051	LTEE	Ara-3	ydhV	coding (2044-2047/2103 nt)	27000
ZDB309	IS150	1776434	LTEE	Ara-3	pheS/pheM	intergenic (-225/+56)	27000
ZDB309	IS150	2122426	LTEE	Ara-3	ECB_02013	coding (198-200/216 nt)	27000
ZDB309	IS150	3015771	LTEE	Ara-3	ECB_02816	coding (1192-1194/1677 nt)	27000
ZDB309	IS150	3268052	LTEE	Ara-3	yhbE/rpmA	intergenic (-83/+42)	27000
ZDB309	IS150	3697154	LTEE	Ara-3	rhsA	coding (278-280/4134 nt)	27000
ZDB309	IS150	4110237	LTEE	Ara-3	metL	coding (296-298/2433 nt)	27000
ZDB309	IS150	4613020	LTEE	Ara-3	smp/serB	intergenic (-17/-87)	27000
4536B	IS150	1733647	LTEE	Ara-1	pykF	coding (683-685/1413 nt)	10000
11393	IS150	16973	LTEE	Ara+1	mokC/nhaA	intergenic (-15/-514)	50000
11393	IS150	23673	LTEE	Ara+1	insB-1	coding (134-140/504 nt)	50000
11393	IS150	183262	LTEE	Ara+1	dgt	coding (1184-1186/1518 nt)	50000
11393	IS150	336055	LTEE	Ara+1	lacZ	coding (2805-2807/3075 nt)	50000
11393	IS150	490481	LTEE	Ara+1	ybbN/ybbO	intergenic (-34/+25)	50000
11393	IS150	502543	LTEE	Ara+1	ybbB	coding (848-850/1095 nt)	50000
11393	IS150	589936	LTEE	Ara+1	insB-7	coding (135-138/504 nt)	50000
11393	IS150	651703	LTEE	Ara+1	ybeB/phpB	intergenic (-83/+174)	50000
11393	IS150	896463	LTEE	Ara+1	ECB_00838	coding (159-161/432 nt)	50000
11393	IS150	929574	LTEE	Ara+1	hcp	coding (946-948/1653 nt)	50000
11393	IS150	969836	LTEE	Ara+1	pflB	coding (810-812/2283 nt)	50000
11393	IS150	1102032	LTEE	Ara+1	phoH	coding (756-758/1065 nt)	50000
11393	IS150	1218697	LTEE	Ara+1	ycgG	coding (1209-1211/1524 nt)	50000
11393	IS150	1270660	LTEE	Ara+1	ldrC/chaA	intergenic (-167/+235)	50000
11393	IS150	1354425	LTEE	Ara+1	sapA	coding (1053-1055/1644 nt)	50000
11393	IS150	1462266	LTEE	Ara+1	mokB/trg	intergenic (-28/-311)	50000
11393	IS150	1619834	LTEE	Ara+1	hokD/ECB_01533	intergenic (-71/+139)	50000
11393	IS150	2086923	LTEE	Ara+1	yegL/yegM	intergenic (-1344/-199)	50000
11393	IS150	2196656	LTEE	Ara+1	cirA	coding (1350-1352/1992 nt)	50000
11393	IS150	2397543	LTEE	Ara+1	yfcTU	coding (1121-1123/2646 nt)	50000
11393	IS150	2522900	LTEE	Ara+1	hyfB	coding (255-257/2019 nt)	50000
11393	IS150	2655781	LTEE	Ara+1	yfiH	coding (660-662/732 nt)	50000
11393	IS150	3008938	LTEE	Ara+1	yeeU	coding (795/1062 nt)	50000
11393	IS150	3270443	LTEE	Ara+1	nlp/murA	intergenic (+21/+24)	50000
11393	IS150	3537175	LTEE	Ara+1	zntA	coding (37-39/2199 nt)	50000
11393	IS150	3550157	LTEE	Ara+1	rhsB	coding (278-280/4236 nt)	50000
11393	IS150	3697154	LTEE	Ara+1	rhsA	coding (278-280/4134 nt)	50000
11393	IS150	3766595	LTEE	Ara+1	gltS	coding (1111-1113/1206 nt)	50000
11393	IS150	3841192	LTEE	Ara+1	recF	coding (389-391/1074 nt)	50000
11393	IS150	3981782	LTEE	Ara+1	ECB_03710	coding (249-251/1224 nt)	50000
11393	IS150	3990387	LTEE	Ara+1	ECB_03719	coding (1250-1252/1491 nt)	50000
11393	IS150	4049580	LTEE	Ara+1	yihS	coding (322-324/1242 nt)	50000
11393	IS150	4092861	LTEE	Ara+1	yiiT	coding (87-89/429 nt)	50000
11393	IS150	4275713	LTEE	Ara+1	yjcO	coding (233-235/690 nt)	50000
11393	IS150	4415710	LTEE	Ara+1	cycA	coding (848-850/1413 nt)	50000
11393	IS150	4615673	LTEE	Ara+1	nadR	coding (145-148/1233 nt)	50000
ZDB111	IS150	16990	LTEE	Ara-3	mokC/nhaA	intergenic (-32/-496)	38000
ZDB111	IS150	23675	LTEE	Ara-3	insB-1	coding (136-138/504 nt)	38000
ZDB111	IS150	105062	LTEE	Ara-3	ddl	coding (26-29/921 nt)	38000
ZDB111	IS150	643362	LTEE	Ara-3	ybeF	coding (598-600/954 nt)	38000
ZDB111	IS150	687047	LTEE	Ara-3	nagE	coding (1009-1011/1947 nt)	38000
ZDB111	IS150	931315	LTEE	Ara-3	ybjE	coding (250/900 nt)	38000
ZDB111	IS150	1270660	LTEE	Ara-3	ldrC/chaA	intergenic (-167/+235)	38000
ZDB111	IS150	1462320	LTEE	Ara-3	mokB/trg	intergenic (-82/-257)	38000
ZDB111	IS150	1776434	LTEE	Ara-3	pheS/pheM	intergenic (-225/+56)	38000
ZDB111	IS150	1962241	LTEE	Ara-3	araG	coding (821-823/1515 nt)	38000
ZDB111	IS150	1981795	LTEE	Ara-3	yeeI	coding (146-148/798 nt)	38000
ZDB111	IS150	2122426	LTEE	Ara-3	ECB_02013	coding (198-200/216 nt)	38000
ZDB111	IS150	2157881	LTEE	Ara-3	yehM	coding (991-993/2280 nt)	38000
ZDB111	IS150	2191174	LTEE	Ara-3	mglB	coding (411-413/999 nt)	38000
ZDB111	IS150	2551327	LTEE	Ara-3	yfgI	coding (183-185/540 nt)	38000
ZDB111	IS150	2681614	LTEE	Ara-3	ECB_02512	coding (247-249/897 nt)	38000
ZDB111	IS150	2876182	LTEE	Ara-3	araE	coding (620-622/1419 nt)	38000
ZDB111	IS150	2899574	LTEE	Ara-3	yqeB	coding (419-421/1626 nt)	38000
ZDB111	IS150	3015771	LTEE	Ara-3	ECB_02816	coding (1192-1194/1677 nt)	38000
ZDB111	IS150	3268052	LTEE	Ara-3	yhbE/rpmA	intergenic (-83/+42)	38000
ZDB111	IS150	3535848	LTEE	Ara-3	yhhL	coding (182-184/270 nt)	38000
ZDB111	IS150	3637598	LTEE	Ara-3	dppA	coding (564-566/1608 nt)	38000
ZDB111	IS150	3697154	LTEE	Ara-3	rhsA	coding (278-280/4134 nt)	38000
ZDB111	IS150	3835924	LTEE	Ara-3	yidX	coding (126-128/657 nt)	38000
ZDB111	IS150	4110237	LTEE	Ara-3	metL	coding (296-298/2433 nt)	38000
ZDB111	IS150	4196771	LTEE	Ara-3	aceA	coding (218-220/1305 nt)	38000
ZDB111	IS150	4435951	LTEE	Ara-3	ytfT	coding (128-130/1023 nt)	38000
ZDB111	IS150	4613020	LTEE	Ara-3	smp/serB	intergenic (-17/-87)	38000
10950	IS150	2899615	LTEE	Ara+2	yqeB	coding (378-380/1626 nt)	40000
10950	IS150	3035123	LTEE	Ara+2	ECB_02836	coding (317-319/1224 nt)	40000
JEB819	IS150	1270661	MAE	JEB819	ldrC/chaA	intergenic (-168/+235)	13750
7178A	IS150	2899617	LTEE	Ara-2	yqeB	coding (376-378/1626 nt)	15000
10411	IS150	1270125	LTEE	Ara+3	ldrB/ldrC	intergenic (-167/+258)	30000
10988	IS150	15565	LTEE	Ara-3	insL-1	coding (123-125/1113 nt)	40000
10988	IS150	16990	LTEE	Ara-3	mokC/nhaA	intergenic (-32/-496)	40000
10988	IS150	23675	LTEE	Ara-3	insB-1	coding (136-138/504 nt)	40000
10988	IS150	105062	LTEE	Ara-3	ddl	coding (26-29/921 nt)	40000
10988	IS150	507705	LTEE	Ara-3	gcl	coding (1624-1626/1782 nt)	40000
10988	IS150	643362	LTEE	Ara-3	ybeF	coding (598-600/954 nt)	40000
10988	IS150	687047	LTEE	Ara-3	nagE	coding (1009-1011/1947 nt)	40000
10988	IS150	931315	LTEE	Ara-3	ybjE	coding (250/900 nt)	40000
10988	IS150	1270660	LTEE	Ara-3	ldrC/chaA	intergenic (-167/+235)	40000
10988	IS150	1462320	LTEE	Ara-3	mokB/trg	intergenic (-82/-257)	40000
10988	IS150	1776434	LTEE	Ara-3	pheS/pheM	intergenic (-225/+56)	40000
10988	IS150	1962241	LTEE	Ara-3	araG	coding (821-823/1515 nt)	40000
10988	IS150	1981795	LTEE	Ara-3	yeeI	coding (146-148/798 nt)	40000
10988	IS150	2122426	LTEE	Ara-3	ECB_02013	coding (198-200/216 nt)	40000
10988	IS150	2157881	LTEE	Ara-3	yehM	coding (991-993/2280 nt)	40000
10988	IS150	2191174	LTEE	Ara-3	mglB	coding (411-413/999 nt)	40000
10988	IS150	2551327	LTEE	Ara-3	yfgI	coding (183-185/540 nt)	40000
10988	IS150	2681614	LTEE	Ara-3	ECB_02512	coding (247-249/897 nt)	40000
10988	IS150	2899574	LTEE	Ara-3	yqeB	coding (419-421/1626 nt)	40000
10988	IS150	3015771	LTEE	Ara-3	ECB_02816	coding (1192-1194/1677 nt)	40000
10988	IS150	3268052	LTEE	Ara-3	yhbE/rpmA	intergenic (-83/+42)	40000
10988	IS150	3313720	LTEE	Ara-3	yhcN/yhcO	intergenic (+22/+32)	40000
10988	IS150	3535848	LTEE	Ara-3	yhhL	coding (182-184/270 nt)	40000
10988	IS150	3542565	LTEE	Ara-3	yhhT	coding (13-15/1050 nt)	40000
10988	IS150	3637598	LTEE	Ara-3	dppA	coding (564-566/1608 nt)	40000
10988	IS150	3697154	LTEE	Ara-3	rhsA	coding (278-280/4134 nt)	40000
10988	IS150	3835924	LTEE	Ara-3	yidX	coding (126-128/657 nt)	40000
10988	IS150	4097692	LTEE	Ara-3	glpF/yiiU	intergenic (-120/-303)	40000
10988	IS150	4110237	LTEE	Ara-3	metL	coding (296-298/2433 nt)	40000
10988	IS150	4196771	LTEE	Ara-3	aceA	coding (218-220/1305 nt)	40000
10988	IS150	4435951	LTEE	Ara-3	ytfT	coding (128-130/1023 nt)	40000
10988	IS150	4613020	LTEE	Ara-3	smp/serB	intergenic (-17/-87)	40000
ZDB87	IS150	16990	LTEE	Ara-3	mokC/nhaA	intergenic (-32/-496)	34000
ZDB87	IS150	23675	LTEE	Ara-3	insB-1	coding (136-138/504 nt)	34000
ZDB87	IS150	643362	LTEE	Ara-3	ybeF	coding (598-600/954 nt)	34000
ZDB87	IS150	931315	LTEE	Ara-3	ybjE	coding (250/900 nt)	34000
ZDB87	IS150	1270660	LTEE	Ara-3	ldrC/chaA	intergenic (-167/+235)	34000
ZDB87	IS150	1462320	LTEE	Ara-3	mokB/trg	intergenic (-82/-257)	34000
ZDB87	IS150	1776434	LTEE	Ara-3	pheS/pheM	intergenic (-225/+56)	34000
ZDB87	IS150	1981795	LTEE	Ara-3	yeeI	coding (146-148/798 nt)	34000
ZDB87	IS150	2122426	LTEE	Ara-3	ECB_02013	coding (198-200/216 nt)	34000
ZDB87	IS150	2191174	LTEE	Ara-3	mglB	coding (411-413/999 nt)	34000
ZDB87	IS150	2551327	LTEE	Ara-3	yfgI	coding (183-185/540 nt)	34000
ZDB87	IS150	2899574	LTEE	Ara-3	yqeB	coding (419-421/1626 nt)	34000
ZDB87	IS150	3015771	LTEE	Ara-3	ECB_02816	coding (1192-1194/1677 nt)	34000
ZDB87	IS150	3268052	LTEE	Ara-3	yhbE/rpmA	intergenic (-83/+42)	34000
ZDB87	IS150	3697154	LTEE	Ara-3	rhsA	coding (278-280/4134 nt)	34000
ZDB87	IS150	4110237	LTEE	Ara-3	metL	coding (296-298/2433 nt)	34000
ZDB87	IS150	4613020	LTEE	Ara-3	smp/serB	intergenic (-17/-87)	34000
ZDB30	IS150	16990	LTEE	Ara-3	mokC/nhaA	intergenic (-32/-496)	32000
ZDB30	IS150	643362	LTEE	Ara-3	ybeF	coding (598-600/954 nt)	32000
ZDB30	IS150	1047818	LTEE	Ara-3	yccK/yccA	intergenic (-59/+30)	32000
ZDB30	IS150	1270660	LTEE	Ara-3	ldrC/chaA	intergenic (-167/+235)	32000
ZDB30	IS150	1451972	LTEE	Ara-3	acpD	coding (218-220/606 nt)	32000
ZDB30	IS150	1462320	LTEE	Ara-3	mokB/trg	intergenic (-82/-257)	32000
ZDB30	IS150	1651966	LTEE	Ara-3	ydgG	coding (859-862/1035 nt)	32000
ZDB30	IS150	1729051	LTEE	Ara-3	ydhV	coding (2044-2047/2103 nt)	32000
ZDB30	IS150	1776434	LTEE	Ara-3	pheS/pheM	intergenic (-225/+56)	32000
ZDB30	IS150	2122426	LTEE	Ara-3	ECB_02013	coding (198-200/216 nt)	32000
ZDB30	IS150	2157881	LTEE	Ara-3	yehM	coding (991-993/2280 nt)	32000
ZDB30	IS150	2170662	LTEE	Ara-3	yehZ	coding (15-17/918 nt)	32000
ZDB30	IS150	2655781	LTEE	Ara-3	yfiH	coding (660-662/732 nt)	32000
ZDB30	IS150	2899615	LTEE	Ara-3	yqeB	coding (378-380/1626 nt)	32000
ZDB30	IS150	3015771	LTEE	Ara-3	ECB_02816	coding (1192-1194/1677 nt)	32000
ZDB30	IS150	3268052	LTEE	Ara-3	yhbE/rpmA	intergenic (-83/+42)	32000
ZDB30	IS150	3511245	LTEE	Ara-3	yhhX	coding (1012-1014/1038 nt)	32000
ZDB30	IS150	3697154	LTEE	Ara-3	rhsA	coding (278-280/4134 nt)	32000
ZDB30	IS150	4110237	LTEE	Ara-3	metL	coding (296-298/2433 nt)	32000
ZDB30	IS150	4415710	LTEE	Ara-3	cycA	coding (848-850/1413 nt)	32000
ZDB30	IS150	4613020	LTEE	Ara-3	smp/serB	intergenic (-17/-87)	32000
8593A	IS150	16972	LTEE	Ara-1	mokC/nhaA	intergenic (-14/-514)	20000
8593A	IS150	241691	LTEE	Ara-1	insB-2	coding (186-188/504 nt)	20000
8593A	IS150	1270660	LTEE	Ara-1	ldrC/chaA	intergenic (-167/+235)	20000
8593A	IS150	1733647	LTEE	Ara-1	pykF	coding (683-685/1413 nt)	20000
8593A	IS150	1821525	LTEE	Ara-1	ynjI	coding (573-575/1041 nt)	20000
8593A	IS150	3015771	LTEE	Ara-1	ECB_02816	coding (1192-1195/1677 nt)	20000
4531B	IS150	2899615	LTEE	Ara+2	yqeB	coding (378-380/1626 nt)	10000
8597A	IS150	16972	LTEE	Ara-5	mokC/nhaA	intergenic (-14/-514)	20000
8597A	IS150	641158	LTEE	Ara-5	ybeM	coding (546-549/789 nt)	20000
8597A	IS150	970687	LTEE	Ara-5	pflB/focA	intergenic (-40/+13)	20000
8597A	IS150	1136030	LTEE	Ara-5	dinI	coding (28-30/246 nt)	20000
8597A	IS150	1462251	LTEE	Ara-5	mokB/trg	intergenic (-13/-326)	20000
8597A	IS150	1619926	LTEE	Ara-5	hokD/ECB_01533	intergenic (-163/+46)	20000
8597A	IS150	2283472	LTEE	Ara-5	yfaA/gyrA	intergenic (-128/+19)	20000
8597A	IS150	4252526	LTEE	Ara-5	uvrA	coding (276-278/2823 nt)	20000
8597A	IS150	4567086	LTEE	Ara-5	yjiX/yjiY	intergenic (-32/+16)	20000
4535B	IS150	1462251	LTEE	Ara+6	mokB/trg	intergenic (-13/-326)	10000
10954	IS150	1270125	LTEE	Ara+3	ldrB/ldrC	intergenic (-167/+258)	40000
11392	IS150	16973	LTEE	Ara+1	mokC/nhaA	intergenic (-15/-514)	50000
11392	IS150	183262	LTEE	Ara+1	dgt	coding (1184-1186/1518 nt)	50000
11392	IS150	336055	LTEE	Ara+1	lacZ	coding (2805-2807/3075 nt)	50000
11392	IS150	490481	LTEE	Ara+1	ybbN/ybbO	intergenic (-34/+25)	50000
11392	IS150	502543	LTEE	Ara+1	ybbB	coding (848-850/1095 nt)	50000
11392	IS150	589936	LTEE	Ara+1	insB-7	coding (135-138/504 nt)	50000
11392	IS150	651703	LTEE	Ara+1	ybeB/phpB	intergenic (-83/+174)	50000
11392	IS150	896463	LTEE	Ara+1	ECB_00838	coding (159-161/432 nt)	50000
11392	IS150	929574	LTEE	Ara+1	hcp	coding (946-948/1653 nt)	50000
11392	IS150	969836	LTEE	Ara+1	pflB	coding (810-812/2283 nt)	50000
11392	IS150	1102032	LTEE	Ara+1	phoH	coding (756-758/1065 nt)	50000
11392	IS150	1218697	LTEE	Ara+1	ycgG	coding (1209-1211/1524 nt)	50000
11392	IS150	1270660	LTEE	Ara+1	ldrC/chaA	intergenic (-167/+235)	50000
11392	IS150	1354425	LTEE	Ara+1	sapA	coding (1053-1055/1644 nt)	50000
11392	IS150	1462266	LTEE	Ara+1	mokB/trg	intergenic (-28/-311)	50000
11392	IS150	1619834	LTEE	Ara+1	hokD/ECB_01533	intergenic (-71/+139)	50000
11392	IS150	2086923	LTEE	Ara+1	yegL/yegM	intergenic (-1344/-199)	50000
11392	IS150	2196656	LTEE	Ara+1	cirA	coding (1350-1352/1992 nt)	50000
11392	IS150	2397543	LTEE	Ara+1	yfcTU	coding (1121-1123/2646 nt)	50000
11392	IS150	2522900	LTEE	Ara+1	hyfB	coding (255-257/2019 nt)	50000
11392	IS150	2655781	LTEE	Ara+1	yfiH	coding (660-662/732 nt)	50000
11392	IS150	3008938	LTEE	Ara+1	yeeU	coding (795/1062 nt)	50000
11392	IS150	3270443	LTEE	Ara+1	nlp/murA	intergenic (+21/+24)	50000
11392	IS150	3537175	LTEE	Ara+1	zntA	coding (37-39/2199 nt)	50000
11392	IS150	3697154	LTEE	Ara+1	rhsA	coding (278-280/4134 nt)	50000
11392	IS150	3766595	LTEE	Ara+1	gltS	coding (1111-1113/1206 nt)	50000
11392	IS150	3841192	LTEE	Ara+1	recF	coding (389-391/1074 nt)	50000
11392	IS150	3981782	LTEE	Ara+1	ECB_03710	coding (249-251/1224 nt)	50000
11392	IS150	3990387	LTEE	Ara+1	ECB_03719	coding (1250-1252/1491 nt)	50000
11392	IS150	4049580	LTEE	Ara+1	yihS	coding (322-324/1242 nt)	50000
11392	IS150	4092861	LTEE	Ara+1	yiiT	coding (87-89/429 nt)	50000
11392	IS150	4275713	LTEE	Ara+1	yjcO	coding (233-235/690 nt)	50000
11392	IS150	4415710	LTEE	Ara+1	cycA	coding (848-850/1413 nt)	50000
11392	IS150	4615673	LTEE	Ara+1	nadR	coding (145-148/1233 nt)	50000
10951	IS150	2899615	LTEE	Ara+2	yqeB	coding (378-380/1626 nt)	40000
10951	IS150	3035123	LTEE	Ara+2	ECB_02836	coding (317-319/1224 nt)	40000
JEB818	IS150	1619834	MAE	JEB818	hokD/ECB_01533	intergenic (-71/+139)	13750
ZDB1	IS150	16990	LTEE	Ara-3	mokC/nhaA	intergenic (-32/-496)	10000
ZDB1	IS150	1270660	LTEE	Ara-3	ldrC/chaA	intergenic (-167/+235)	10000
ZDB1	IS150	1462320	LTEE	Ara-3	mokB/trg	intergenic (-82/-257)	10000
ZDB1	IS150	4110237	LTEE	Ara-3	metL	coding (296-298/2433 nt)	10000
ZDB1	IS150	4613020	LTEE	Ara-3	smp/serB	intergenic (-17/-87)	10000
ZDB483	IS150	16990	LTEE	Ara-3	mokC/nhaA	intergenic (-32/-496)	25000
ZDB483	IS150	643362	LTEE	Ara-3	ybeF	coding (598-600/954 nt)	25000
ZDB483	IS150	1270660	LTEE	Ara-3	ldrC/chaA	intergenic (-167/+235)	25000
ZDB483	IS150	1451972	LTEE	Ara-3	acpD	coding (218-220/606 nt)	25000
ZDB483	IS150	1462320	LTEE	Ara-3	mokB/trg	intergenic (-82/-257)	25000
ZDB483	IS150	1729051	LTEE	Ara-3	ydhV	coding (2044-2047/2103 nt)	25000
ZDB483	IS150	1776434	LTEE	Ara-3	pheS/pheM	intergenic (-225/+56)	25000
ZDB483	IS150	2122426	LTEE	Ara-3	ECB_02013	coding (198-200/216 nt)	25000
ZDB483	IS150	3015771	LTEE	Ara-3	ECB_02816	coding (1192-1194/1677 nt)	25000
ZDB483	IS150	3268052	LTEE	Ara-3	yhbE/rpmA	intergenic (-83/+42)	25000
ZDB483	IS150	3697154	LTEE	Ara-3	rhsA	coding (278-280/4134 nt)	25000
ZDB483	IS150	4110237	LTEE	Ara-3	metL	coding (296-298/2433 nt)	25000
ZDB483	IS150	4613020	LTEE	Ara-3	smp/serB	intergenic (-17/-87)	25000
ZDB172	IS150	16990	LTEE	Ara-3	mokC/nhaA	intergenic (-32/-496)	32000
ZDB172	IS150	643362	LTEE	Ara-3	ybeF	coding (598-600/954 nt)	32000
ZDB172	IS150	1028311	LTEE	Ara-3	uup	coding (1257-1260/1908 nt)	32000
ZDB172	IS150	1270660	LTEE	Ara-3	ldrC/chaA	intergenic (-167/+235)	32000
ZDB172	IS150	1451972	LTEE	Ara-3	acpD	coding (218-220/606 nt)	32000
ZDB172	IS150	1462320	LTEE	Ara-3	mokB/trg	intergenic (-82/-257)	32000
ZDB172	IS150	1729051	LTEE	Ara-3	ydhV	coding (2044-2047/2103 nt)	32000
ZDB172	IS150	1776434	LTEE	Ara-3	pheS/pheM	intergenic (-225/+56)	32000
ZDB172	IS150	2122426	LTEE	Ara-3	ECB_02013	coding (198-200/216 nt)	32000
ZDB172	IS150	2655781	LTEE	Ara-3	yfiH	coding (660-662/732 nt)	32000
ZDB172	IS150	2899615	LTEE	Ara-3	yqeB	coding (378-380/1626 nt)	32000
ZDB172	IS150	3015771	LTEE	Ara-3	ECB_02816	coding (1192-1194/1677 nt)	32000
ZDB172	IS150	3268052	LTEE	Ara-3	yhbE/rpmA	intergenic (-83/+42)	32000
ZDB172	IS150	3697154	LTEE	Ara-3	rhsA	coding (278-280/4134 nt)	32000
ZDB172	IS150	4110237	LTEE	Ara-3	metL	coding (296-298/2433 nt)	32000
ZDB172	IS150	4415710	LTEE	Ara-3	cycA	coding (848-850/1413 nt)	32000
ZDB172	IS150	4613020	LTEE	Ara-3	smp/serB	intergenic (-17/-87)	32000
ZDB446	IS150	16990	LTEE	Ara-3	mokC/nhaA	intergenic (-32/-496)	15000
ZDB446	IS150	78888	LTEE	Ara-3	yabN	coding (1214-1216/1656 nt)	15000
ZDB446	IS150	680759	LTEE	Ara-3	asnB	coding (512-514/1665 nt)	15000
ZDB446	IS150	934210	LTEE	Ara-3	ybjD	coding (1032-1034/1659 nt)	15000
ZDB446	IS150	1270660	LTEE	Ara-3	ldrC/chaA	intergenic (-167/+235)	15000
ZDB446	IS150	1462320	LTEE	Ara-3	mokB/trg	intergenic (-82/-257)	15000
ZDB446	IS150	1866486	LTEE	Ara-3	rnd	coding (82-84/1128 nt)	15000
ZDB446	IS150	2241332	LTEE	Ara-3	narP/ccmH	intergenic (+196/+13)	15000
ZDB446	IS150	2830450	LTEE	Ara-3	fucI	coding (248-250/1776 nt)	15000
ZDB446	IS150	3015727	LTEE	Ara-3	ECB_02816	coding (1148-1150/1677 nt)	15000
ZDB446	IS150	4110237	LTEE	Ara-3	metL	coding (296-298/2433 nt)	15000
ZDB446	IS150	4613020	LTEE	Ara-3	smp/serB	intergenic (-17/-87)	15000
ZDB83	IS150	16990	LTEE	Ara-3	mokC/nhaA	intergenic (-32/-496)	34000
ZDB83	IS150	643362	LTEE	Ara-3	ybeF	coding (598-600/954 nt)	34000
ZDB83	IS150	1270660	LTEE	Ara-3	ldrC/chaA	intergenic (-167/+235)	34000
ZDB83	IS150	1451972	LTEE	Ara-3	acpD	coding (218-220/606 nt)	34000
ZDB83	IS150	1462320	LTEE	Ara-3	mokB/trg	intergenic (-82/-257)	34000
ZDB83	IS150	1729051	LTEE	Ara-3	ydhV	coding (2044-2047/2103 nt)	34000
ZDB83	IS150	1776434	LTEE	Ara-3	pheS/pheM	intergenic (-225/+56)	34000
ZDB83	IS150	2122426	LTEE	Ara-3	ECB_02013	coding (198-200/216 nt)	34000
ZDB83	IS150	2655781	LTEE	Ara-3	yfiH	coding (660-662/732 nt)	34000
ZDB83	IS150	2899615	LTEE	Ara-3	yqeB	coding (378-380/1626 nt)	34000
ZDB83	IS150	3015771	LTEE	Ara-3	ECB_02816	coding (1192-1194/1677 nt)	34000
ZDB83	IS150	3268052	LTEE	Ara-3	yhbE/rpmA	intergenic (-83/+42)	34000
ZDB83	IS150	3697154	LTEE	Ara-3	rhsA	coding (278-280/4134 nt)	34000
ZDB83	IS150	4110237	LTEE	Ara-3	metL	coding (296-298/2433 nt)	34000
ZDB83	IS150	4415710	LTEE	Ara-3	cycA	coding (848-850/1413 nt)	34000
ZDB83	IS150	4613020	LTEE	Ara-3	smp/serB	intergenic (-17/-87)	34000
7183A	IS150	16973	LTEE	Ara+1	mokC/nhaA	intergenic (-15/-514)	15000
7183A	IS150	118842	LTEE	Ara+1	hofB	coding (1060-1062/1386 nt)	15000
7183A	IS150	490481	LTEE	Ara+1	ybbN/ybbO	intergenic (-34/+25)	15000
7183A	IS150	589936	LTEE	Ara+1	insB-7	coding (135-138/504 nt)	15000
7183A	IS150	651703	LTEE	Ara+1	ybeB/phpB	intergenic (-83/+174)	15000
7183A	IS150	1102032	LTEE	Ara+1	phoH	coding (756-758/1065 nt)	15000
7183A	IS150	1270660	LTEE	Ara+1	ldrC/chaA	intergenic (-167/+235)	15000
7183A	IS150	1462266	LTEE	Ara+1	mokB/trg	intergenic (-28/-311)	15000
7183A	IS150	1619834	LTEE	Ara+1	hokD/ECB_01533	intergenic (-71/+139)	15000
7183A	IS150	2093029	LTEE	Ara+1	yegO	coding (1536/3078 nt)	15000
7183A	IS150	2397543	LTEE	Ara+1	yfcTU	coding (1121-1123/2646 nt)	15000
7183A	IS150	2877313	LTEE	Ara+1	kduD	coding (565-567/762 nt)	15000
7183A	IS150	2899615	LTEE	Ara+1	yqeB	coding (378-380/1626 nt)	15000
7183A	IS150	3008938	LTEE	Ara+1	yeeU	coding (795/1062 nt)	15000
7183A	IS150	3697154	LTEE	Ara+1	rhsA	coding (278-280/4134 nt)	15000
7183A	IS150	4275713	LTEE	Ara+1	yjcO	coding (233-235/690 nt)	15000
7183A	IS150	4415710	LTEE	Ara+1	cycA	coding (848-850/1413 nt)	15000
7183A	IS150	4615673	LTEE	Ara+1	nadR	coding (145-148/1233 nt)	15000
8601B	IS150	2899615	LTEE	Ara+2	yqeB	coding (378-380/1626 nt)	20000
CZB154	IS150	16990	LTEE	Ara-3	mokC/nhaA	intergenic (-32/-496)	33000
CZB154	IS150	643362	LTEE	Ara-3	ybeF	coding (598-600/954 nt)	33000
CZB154	IS150	1270660	LTEE	Ara-3	ldrC/chaA	intergenic (-167/+235)	33000
CZB154	IS150	1451972	LTEE	Ara-3	acpD	coding (218-220/606 nt)	33000
CZB154	IS150	1462320	LTEE	Ara-3	mokB/trg	intergenic (-82/-257)	33000
CZB154	IS150	1729051	LTEE	Ara-3	ydhV	coding (2044-2047/2103 nt)	33000
CZB154	IS150	1776434	LTEE	Ara-3	pheS/pheM	intergenic (-225/+56)	33000
CZB154	IS150	2122426	LTEE	Ara-3	ECB_02013	coding (198-200/216 nt)	33000
CZB154	IS150	2655781	LTEE	Ara-3	yfiH	coding (660-662/732 nt)	33000
CZB154	IS150	2899615	LTEE	Ara-3	yqeB	coding (378-380/1626 nt)	33000
CZB154	IS150	3015771	LTEE	Ara-3	ECB_02816	coding (1192-1194/1677 nt)	33000
CZB154	IS150	3268052	LTEE	Ara-3	yhbE/rpmA	intergenic (-83/+42)	33000
CZB154	IS150	3697154	LTEE	Ara-3	rhsA	coding (278-280/4134 nt)	33000
CZB154	IS150	4110237	LTEE	Ara-3	metL	coding (296-298/2433 nt)	33000
CZB154	IS150	4415710	LTEE	Ara-3	cycA	coding (848-850/1413 nt)	33000
CZB154	IS150	4613020	LTEE	Ara-3	smp/serB	intergenic (-17/-87)	33000
7187A	IS150	17045	LTEE	Ara+5	mokC/nhaA	intergenic (-87/-441)	15000
7187A	IS150	1270660	LTEE	Ara+5	ldrC/chaA	intergenic (-167/+235)	15000
7187A	IS150	2734828	LTEE	Ara+5	ascF	coding (445-446/1458 nt)	15000
7187A	IS150	3080114	LTEE	Ara+5	hybO	pseudogene (119-121/1005 nt)	15000
7187A	IS150	3270443	LTEE	Ara+5	nlp/murA	intergenic (+21/+24)	15000
7187A	IS150	3542568	LTEE	Ara+5	yhhT	coding (16-17/1050 nt)	15000
11364	IS150	16990	LTEE	Ara-3	mokC/nhaA	intergenic (-32/-496)	50000
11364	IS150	643362	LTEE	Ara-3	ybeF	coding (598-600/954 nt)	50000
11364	IS150	1153894	LTEE	Ara-3	flgK	coding (948-950/1644 nt)	50000
11364	IS150	1270660	LTEE	Ara-3	ldrC/chaA	intergenic (-167/+235)	50000
11364	IS150	1451972	LTEE	Ara-3	acpD	coding (218-220/606 nt)	50000
11364	IS150	1462320	LTEE	Ara-3	mokB/trg	intergenic (-82/-257)	50000
11364	IS150	1619926	LTEE	Ara-3	hokD/ECB_01533	intergenic (-163/+47)	50000
11364	IS150	1729051	LTEE	Ara-3	ydhV	coding (2044-2047/2103 nt)	50000
11364	IS150	1776434	LTEE	Ara-3	pheS/pheM	intergenic (-225/+56)	50000
11364	IS150	2122426	LTEE	Ara-3	ECB_02013	coding (198-200/216 nt)	50000
11364	IS150	2655781	LTEE	Ara-3	yfiH	coding (660-662/732 nt)	50000
11364	IS150	2877313	LTEE	Ara-3	kduD	coding (565-567/762 nt)	50000
11364	IS150	2899615	LTEE	Ara-3	yqeB	coding (378-380/1626 nt)	50000
11364	IS150	3015771	LTEE	Ara-3	ECB_02816	coding (1192-1194/1677 nt)	50000
11364	IS150	3192744	LTEE	Ara-3	tdcG/tdcF	intergenic (-61/+8)	50000
11364	IS150	3268052	LTEE	Ara-3	yhbE/rpmA	intergenic (-83/+42)	50000
11364	IS150	3680780	LTEE	Ara-3	sgbE	coding (239-241/696 nt)	50000
11364	IS150	3697154	LTEE	Ara-3	rhsA	coding (278-280/4134 nt)	50000
11364	IS150	4110237	LTEE	Ara-3	metL	coding (296-298/2433 nt)	50000
11364	IS150	4289282	LTEE	Ara-3	alsA	coding (519-521/1533 nt)	50000
11364	IS150	4415710	LTEE	Ara-3	cycA	coding (848-850/1413 nt)	50000
11364	IS150	4446816	LTEE	Ara-3	treC	coding (1171/1656 nt)	50000
11364	IS150	4588156	LTEE	Ara-3	mdoB	coding (518-520/2292 nt)	50000
11364	IS150	4613020	LTEE	Ara-3	smp/serB	intergenic (-17/-87)	50000
ZDB467	IS150	16990	LTEE	Ara-3	mokC/nhaA	intergenic (-32/-496)	20000
ZDB467	IS150	643362	LTEE	Ara-3	ybeF	coding (598-600/954 nt)	20000
ZDB467	IS150	1249796	LTEE	Ara-3	dhaL	coding (110-112/633 nt)	20000
ZDB467	IS150	1270660	LTEE	Ara-3	ldrC/chaA	intergenic (-167/+235)	20000
ZDB467	IS150	1462320	LTEE	Ara-3	mokB/trg	intergenic (-82/-257)	20000
ZDB467	IS150	1776434	LTEE	Ara-3	pheS/pheM	intergenic (-225/+56)	20000
ZDB467	IS150	2122426	LTEE	Ara-3	ECB_02013	coding (198-200/216 nt)	20000
ZDB467	IS150	3015771	LTEE	Ara-3	ECB_02816	coding (1192-1194/1677 nt)	20000
ZDB467	IS150	3268052	LTEE	Ara-3	yhbE/rpmA	intergenic (-83/+42)	20000
ZDB467	IS150	4110237	LTEE	Ara-3	metL	coding (296-298/2433 nt)	20000
ZDB467	IS150	4613020	LTEE	Ara-3	smp/serB	intergenic (-17/-87)	20000
10405	IS150	17045	LTEE	Ara-5	mokC/nhaA	intergenic (-87/-441)	30000
10405	IS150	641158	LTEE	Ara-5	ybeM	coding (546-549/789 nt)	30000
10405	IS150	970687	LTEE	Ara-5	pflB/focA	intergenic (-40/+13)	30000
10405	IS150	1101970	LTEE	Ara-5	phoH	coding (694-696/1065 nt)	30000
10405	IS150	1462251	LTEE	Ara-5	mokB/trg	intergenic (-13/-326)	30000
10405	IS150	1997556	LTEE	Ara-5	yeeO	coding (289-291/1644 nt)	30000
10405	IS150	2283472	LTEE	Ara-5	yfaA/gyrA	intergenic (-128/+19)	30000
10405	IS150	4252526	LTEE	Ara-5	uvrA	coding (276-278/2823 nt)	30000
10405	IS150	4567086	LTEE	Ara-5	yjiX/yjiY	intergenic (-32/+16)	30000
8605B	IS150	1462251	LTEE	Ara+6	mokB/trg	intergenic (-13/-326)	20000
11008	IS150	15499	LTEE	Ara+1	insL-1	coding (57-59/1113 nt)	40000
11008	IS150	16973	LTEE	Ara+1	mokC/nhaA	intergenic (-15/-514)	40000
11008	IS150	146104	LTEE	Ara+1	yadG	coding (523-525/927 nt)	40000
11008	IS150	241692	LTEE	Ara+1	insB-2	coding (187-188/504 nt)	40000
11008	IS150	336055	LTEE	Ara+1	lacZ	coding (2805-2807/3075 nt)	40000
11008	IS150	490481	LTEE	Ara+1	ybbN/ybbO	intergenic (-34/+25)	40000
11008	IS150	589936	LTEE	Ara+1	insB-7	coding (135-138/504 nt)	40000
11008	IS150	651703	LTEE	Ara+1	ybeB/phpB	intergenic (-83/+174)	40000
11008	IS150	896463	LTEE	Ara+1	ECB_00838	coding (159-161/432 nt)	40000
11008	IS150	969836	LTEE	Ara+1	pflB	coding (810-812/2283 nt)	40000
11008	IS150	1102032	LTEE	Ara+1	phoH	coding (756-758/1065 nt)	40000
11008	IS150	1270660	LTEE	Ara+1	ldrC/chaA	intergenic (-167/+235)	40000
11008	IS150	1353846	LTEE	Ara+1	sapA	coding (1634/1644 nt)	40000
11008	IS150	1354425	LTEE	Ara+1	sapA	coding (1053-1055/1644 nt)	40000
11008	IS150	1376383	LTEE	Ara+1	ycjT	coding (132-134/2268 nt)	40000
11008	IS150	1462266	LTEE	Ara+1	mokB/trg	intergenic (-28/-311)	40000
11008	IS150	1619834	LTEE	Ara+1	hokD/ECB_01533	intergenic (-71/+139)	40000
11008	IS150	1859000	LTEE	Ara+1	yeaS	coding (336-338/639 nt)	40000
11008	IS150	2019805	LTEE	Ara+1	yeeZ/hisL	intergenic (-234/-191)	40000
11008	IS150	2086923	LTEE	Ara+1	yegL/yegM	intergenic (-1344/-199)	40000
11008	IS150	2283472	LTEE	Ara+1	yfaA/gyrA	intergenic (-128/+19)	40000
11008	IS150	2397543	LTEE	Ara+1	yfcTU	coding (1121-1123/2646 nt)	40000
11008	IS150	2591648	LTEE	Ara+1	hcaC	coding (42-44/321 nt)	40000
11008	IS150	2655781	LTEE	Ara+1	yfiH	coding (660-662/732 nt)	40000
11008	IS150	2877313	LTEE	Ara+1	kduD	coding (565-567/762 nt)	40000
11008	IS150	3008938	LTEE	Ara+1	yeeU	coding (795/1062 nt)	40000
11008	IS150	3493824	LTEE	Ara+1	ECB_03279	coding (104-106/993 nt)	40000
11008	IS150	3697154	LTEE	Ara+1	rhsA	coding (278-280/4134 nt)	40000
11008	IS150	3981782	LTEE	Ara+1	ECB_03710	coding (249-251/1224 nt)	40000
11008	IS150	4275713	LTEE	Ara+1	yjcO	coding (233-235/690 nt)	40000
11008	IS150	4415710	LTEE	Ara+1	cycA	coding (848-850/1413 nt)	40000
11008	IS150	4615673	LTEE	Ara+1	nadR	coding (145-148/1233 nt)	40000
