# Supplementary material for: Genomic and phenotypic evolution of Escherichia coli in a novel citrate-only resource environment
Source: eLife. 2020 May 29;9:e55414. doi: 10.7554/eLife.55414 (PMC7299349; doi:10.7554/eLife.55414)
Supplement: Figure 13—source data 1. [file elife-55414-fig13-data1.csv]

	left.boundary	right.boundary	coverage.min	coverage.max	coverage.mean	len	copy.number.min	copy.number.max	copy.number.mean	pval	is.significant	Genome	bonferroni.corrected.pval
1	625464	628396	86	139	106.919481405664	2932	3.38582677165354	5.47244094488189	4.20942840179778	1.33900406439749e-18	TRUE	CZB151	6.05775213463096e-12
2	625464	628396	476	1054	757.002388263391	2932	5.17391304347826	11.4565217391304	8.22828682894991	6.04237782664805e-56	TRUE	CZB152	2.73361583813371e-49
3	620275	622993	262	655	454.883695252116	2718	1.69032258064516	4.2258064516129	2.93473351775559	1.55627796439601e-12	TRUE	CZB154	7.05691441655033e-06
4	623679	633566	267	1524	642.307202103985	9887	1.72258064516129	9.83225806451613	4.14391743292894	7.61505150028317e-46	TRUE	CZB154	3.4530313957107e-39
5	625472	628307	202	506	335.821100917431	2835	1.69890664423886	4.25567703952902	2.82439950309025	6.22971955914075e-25	TRUE	ZDBp871	2.81956795760733e-18
6	625464	628396	243	451	343.259979529171	2932	8.04635761589404	14.9337748344371	11.3662244877209	3.29358357525876e-48	TRUE	ZDBp875	1.49004125260716e-41
7	625464	628396	225	697	472.159672466735	2932	3.65853658536585	11.3333333333333	7.67739304823959	1.52034164959266e-25	TRUE	ZDBp877	6.87813660769761e-19
8	625464	628396	291	966	623.344933469805	2932	1.78527607361963	5.92638036809816	3.82420204582703	3.92951181238283e-30	TRUE	ZDBp880	1.80002330494388e-23
9	3502931	3504486	271	549	380.750321750322	1555	1.66257668711656	3.3680981595092	2.3358915444805	6.2577847448506e-14	TRUE	ZDBp880	2.86655414613015e-07
10	3506183	3507595	271	606	392.425230333097	1412	1.66257668711656	3.71779141104294	2.4075167505098	1.30851455621273e-12	TRUE	ZDBp880	5.9940186173227e-06
11	3508899	3510693	271	503	378.668711656442	1794	1.66257668711656	3.08588957055215	2.32312093040762	2.99269654486889e-15	TRUE	ZDBp880	1.37088874715011e-08
12	3519954	3521770	272	507	370.498622589532	1816	1.66871165644172	3.11042944785276	2.27299768459835	1.05359183254787e-16	TRUE	ZDBp880	4.82627344829046e-10
13	3521854	3523852	272	507	366.178267401102	1998	1.66871165644172	3.11042944785276	2.24649243804357	4.91166149582749e-18	TRUE	ZDBp880	2.24992456585182e-11
14	3524011	3525030	275	496	360.293713163065	1019	1.68711656441718	3.04294478527607	2.21039087830101	6.46691877450579e-09	TRUE	ZDBp880	0.0296235386507994
15	3535751	3536788	272	455	352.390926640927	1037	1.66871165644172	2.79141104294479	2.16190752540446	1.02644621512667e-08	TRUE	ZDBp880	0.0470192531977417
16	3539340	3540776	281	452	341.110104529617	1436	1.7239263803681	2.77300613496933	2.09270002778906	1.27910378292213e-13	TRUE	ZDBp880	5.85929430583782e-07
17	3540779	3541897	273	540	374.999104744852	1118	1.67484662576687	3.31288343558282	2.30060800456965	4.00015886234424e-10	TRUE	ZDBp880	0.00183238517136081
18	3541946	3546531	272	531	380.223603839442	4585	1.66871165644172	3.25766871165644	2.33266014625424	1.1394125227684e-40	TRUE	ZDBp880	5.21939923545956e-34
19	3546693	3547717	272	489	339.020527859238	1024	1.66871165644172	3	2.07988053901373	1.02644621512667e-08	TRUE	ZDBp880	0.0470192531977417
20	3550579	3555405	274	539	387.296580310881	4826	1.68098159509202	3.30674846625767	2.37605263994405	4.80147194782781e-44	TRUE	ZDBp880	2.19944914706426e-37
21	3557640	3559834	274	464	359.426812585499	2194	1.68098159509202	2.84662576687117	2.20507246984969	1.11712378397011e-19	TRUE	ZDBp880	5.1172994042584e-13
22	3559999	3562574	271	513	388.113442113442	2575	1.66257668711656	3.14723926380368	2.38106406204566	3.58026402239366e-23	TRUE	ZDBp880	1.64004054087644e-16
23	3565811	3567184	271	496	378.265306122449	1373	1.66257668711656	3.04294478527607	2.32064604983098	1.30851455621273e-12	TRUE	ZDBp880	5.9940186173227e-06
24	3567263	3569622	276	562	393.08566581849	2359	1.69325153374233	3.4478527607362	2.41156850195393	2.2837281081565e-21	TRUE	ZDBp880	1.04612583270092e-14
25	3570308	3571400	272	494	378.025664527956	1092	1.66871165644172	3.03067484662577	2.31917585599973	4.78511335854198e-10	TRUE	ZDBp880	0.00219195563556553
26	3571636	3575011	276	548	389.703615886189	3375	1.69325153374233	3.36196319018405	2.39081972936312	5.32122695795973e-31	TRUE	ZDBp880	2.43753753457097e-24
27	3579161	3581315	274	541	390.167673014399	2154	1.68098159509202	3.31901840490798	2.39366670560981	1.11712378397011e-19	TRUE	ZDBp880	5.1172994042584e-13
28	620610	622947	208	475	340.026969178082	2337	1.88065099457505	4.29475587703436	3.07438489311105	2.9782778948741e-10	TRUE	ZDBp883	0.00135361658141986
29	624995	633437	208	1417	561.334675986258	8442	1.88065099457505	12.8119349005425	5.07535873405296	7.86793697661396e-39	TRUE	ZDBp883	3.57594903129793e-32
30	1532459	1543586	2501	10558	6466.41443465756	11127	22.6130198915009	95.4611211573237	58.4666766243902	0	TRUE	ZDBp883	0
31	625464	628396	251	762	527.161719549642	2932	2.26738934056007	6.88346883468835	4.76207515401664	2.37833957259422e-37	TRUE	ZDBp886	1.07769058901277e-30
32	3538889	3546089	208	471	354.19127656619	7200	1.87895212285456	4.25474254742547	3.19955986057985	1.56966995679743e-66	TRUE	ZDBp886	7.11260309414734e-60
33	625464	628396	332	814	533.896281132719	2932	2.89956331877729	7.10917030567686	4.66284961687964	1.09720237067198e-27	TRUE	ZDBp889	4.9902618090168e-21
34	1530481	1554577	269	6342	3974.61772151899	24096	2.34934497816594	55.3886462882096	34.7128185285501	1.20104548219809e-157	TRUE	ZDBp889	5.46255782972341e-151
35	625464	628396	314	1243	808.027635619243	2932	2.21282593375617	8.75968992248062	5.69434556461764	5.89370091314473e-43	TRUE	ZDBp892	2.66716723721945e-36
36	625464	628396	294	1174	731.325827362675	2932	2.1304347826087	8.50724637681159	5.29946251712083	3.37217831694842e-21	TRUE	ZDBp895	1.52998057042989e-14
37	625464	628396	388	1364	861.113271920846	2932	2.76747503566334	9.72895863052782	6.14203474979206	6.13549289026352e-65	TRUE	ZDBp898	2.79811914232268e-58
38	3500134	3502803	241	463	342.785232383808	2669	1.71897289586305	3.30242510699001	2.44497312684599	1.58994931253095e-23	TRUE	ZDBp898	7.25103538751644e-17
39	3509006	3511170	239	374	310.477115117892	2164	1.70470756062767	2.66761768901569	2.21453006503489	3.62421866037681e-19	TRUE	ZDBp898	1.65284122904882e-12
40	3520989	3521889	240	422	328.075639599555	900	1.71184022824536	3.00998573466476	2.34005449072436	1.0597887197432e-08	TRUE	ZDBp898	0.0483321414688126
41	3521932	3522939	242	422	323.129224652087	1007	1.72610556348074	3.00998573466476	2.3047733570049	7.61093061602114e-09	TRUE	ZDBp898	0.0347099915662421
42	3530495	3531399	241	368	294.642303433001	904	1.71897289586305	2.62482168330956	2.10158561649787	8.98316532971895e-09	TRUE	ZDBp898	0.0409681297286231
43	3540848	3541935	240	419	316.639042357274	1087	1.71184022824536	2.9885877318117	2.25848104391779	4.96694298417098e-10	TRUE	ZDBp898	0.00226519669917461
44	3541985	3543058	240	404	313.91697761194	1073	1.71184022824536	2.88159771754636	2.23906546085549	4.96694298417098e-10	TRUE	ZDBp898	0.00226519669917461
45	3543109	3544222	240	387	293.527877697842	1113	1.71184022824536	2.76034236804565	2.09363678814438	4.96694298417098e-10	TRUE	ZDBp898	0.00226519669917461
46	3544371	3545989	240	448	332.341991341991	1618	1.71184022824536	3.19543509272468	2.37048495964331	5.11327112229869e-14	TRUE	ZDBp898	2.33193030504437e-07
47	3550799	3552395	239	502	318.798746081505	1596	1.70470756062767	3.58059914407989	2.27388549273541	6.72992586362367e-14	TRUE	ZDBp898	3.06921297477196e-07
48	3552402	3554775	240	449	329.363827993255	2373	1.71184022824536	3.20256776034237	2.34924271036558	1.15624064401587e-20	TRUE	ZDBp898	5.27308748786337e-14
49	3557668	3558866	240	399	305.807852965748	1198	1.71184022824536	2.84593437945792	2.18122577008379	4.96694298417098e-10	TRUE	ZDBp898	0.00226519669917461
50	3559991	3560960	242	455	317.626033057851	969	1.72610556348074	3.2453637660485	2.26552092052676	7.61093061602114e-09	TRUE	ZDBp898	0.0347099915662421
51	625464	628396	354	1093	756.86352780621	2932	1.82756840474961	5.64274651522974	3.90740076306768	2.34814610371171e-31	TRUE	ZDBp901	1.07375156216471e-24
52	2273640	2274983	323	518	385.461997019374	1343	1.66752710376871	2.67423851316469	1.98999482198954	2.89802427958152e-11	TRUE	ZDBp901	0.000132519781987721
53	2275043	2277321	326	556	413.654369784805	2278	1.68301497160558	2.8704181724316	2.13554140312238	6.69906435222456e-21	TRUE	ZDBp901	3.06332336044714e-14
54	2283652	2286100	325	560	402.862689006947	2448	1.67785234899329	2.89106866288074	2.07982802791403	4.25718485714007e-22	TRUE	ZDBp901	1.94670973988904e-15
55	2298718	2300180	326	608	429.186173853525	1462	1.68301497160558	3.13887454827052	2.21572624601717	7.86336599045497e-13	TRUE	ZDBp901	3.59573090566108e-06
56	2301943	2303575	323	502	410.771919068056	1632	1.66752710376871	2.5916365513681	2.12066039787329	6.72399721015048e-14	TRUE	ZDBp901	3.07472456546793e-07
57	2309350	2311008	323	494	401.383222691611	1658	1.66752710376871	2.5503355704698	2.07219010166036	3.23884583800278e-15	TRUE	ZDBp901	1.48104744107231e-08
58	2336087	2337404	327	513	418.741641337386	1317	1.68817759421786	2.64842540010325	2.16180506627458	1.46674592243625e-11	TRUE	ZDBp901	6.70708148451736e-05
59	2389436	2390553	325	660	475.167562724014	1117	1.67785234899329	3.40733092410945	2.45311080394432	4.46931636332592e-10	TRUE	ZDBp901	0.00204371245015113
60	625464	628396	340	1086	733.776526782668	2932	1.77731312075274	5.67694720334553	3.83573720220945	1.73414672060949e-30	TRUE	ZDBp904	7.86877571795489e-24
61	1527610	1540774	2926	8554	5370.91521689584	13164	15.2953476215369	44.7151071615264	28.075876721881	0	TRUE	ZDBp904	0
62	625464	628396	1278	3445	2508.61037188673	2932	2.40135287485908	6.47313040210447	4.71366097686345	1.98834904514051e-71	TRUE	ZDBp910	8.99832728920761e-65
63	625464	628353	457	1450	905.785664819945	2889	1.57803867403315	5.00690607734807	3.1277129310081	5.4735938114104e-28	TRUE	ZDBp911	2.50133439448533e-21
64	1423820	1425140	451	1369	879.48673237301	1320	1.55732044198895	4.72720994475138	3.03690170018304	8.30754486982737e-12	TRUE	ZDBp911	3.79639930045794e-05
65	1425626	1427790	452	2125	1283.15025427647	2164	1.56077348066298	7.33770718232044	4.43076745261211	3.11595968668751e-20	TRUE	ZDBp911	1.4239378011378e-13
66	1428974	1432073	443	1772	1146.35990961911	3099	1.52969613259668	6.11878453038674	3.95842510227593	4.03129714242631e-27	TRUE	ZDBp911	1.84223063386997e-20
67	1432680	1446686	455	2058	1142.80514102106	14006	1.57113259668508	7.10635359116022	3.94615034882964	1.28902917265075e-132	TRUE	ZDBp911	5.89063258279201e-126
68	1521765	1522846	451	705	594.84537037037	1081	1.55732044198895	2.43439226519337	2.05402406895846	2.01622320442956e-10	TRUE	ZDBp911	0.000921377914028948
69	1524520	1526862	442	892	624.658692866296	2342	1.52624309392265	3.08011049723757	2.15697062453832	2.11521105101e-20	TRUE	ZDBp911	9.66613588033757e-14
70	1529926	1537336	445	982	643.585234174652	7410	1.53660220994475	3.39088397790055	2.22232470364176	3.45402708324982e-66	TRUE	ZDBp911	1.57842854996038e-59
71	1538101	1540488	446	893	603.13411567477	2387	1.54005524861878	3.0835635359116	2.08264542705376	6.89623815707381e-21	TRUE	ZDBp911	3.15145739511972e-14
72	1540490	1541445	445	703	590.207547169811	955	1.53660220994475	2.4274861878453	2.0380094860836	9.64461252249187e-09	TRUE	ZDBp911	0.0440741528421463
73	4432211	4433291	453	2853	1604.79981464319	1080	1.56422651933702	9.85151933701657	5.54143582404416	1.54499668483188e-10	TRUE	ZDBp911	0.000706035829527512
74	625464	628396	981	2917	1943.19686113954	2932	4.50827205882353	13.4053308823529	8.93013263391334	2.61967824596587e-117	TRUE	ZDBp912	1.19434274847479e-110
75	4317378	4318308	397	571	483.18837459634	930	1.82444852941176	2.62408088235294	2.22053480972583	7.66877353046357e-09	TRUE	ZDBp912	0.0349628587782071
76	4319286	4320441	392	641	521.475736568458	1155	1.80147058823529	2.94577205882353	2.39648775996534	5.80811437842325e-10	TRUE	ZDBp912	0.0026479890424957
77	4320830	4322228	391	624	502.335003579098	1398	1.796875	2.86764705882353	2.30852483262453	1.5295194311331e-12	TRUE	ZDBp912	6.97326262886754e-06
78	4325422	4328269	393	648	492.667252283907	2847	1.80606617647059	2.97794117647059	2.2640958285106	1.35354516928229e-24	TRUE	ZDBp912	6.17097485217828e-18
79	4328705	4331993	392	662	494.584423486462	3288	1.80147058823529	3.04227941176471	2.27290635793411	1.95932049275338e-28	TRUE	ZDBp912	8.93277724492178e-22
80	4333647	4335450	391	649	494.729189789123	1803	1.796875	2.98253676470588	2.27357164425149	1.7622735849674e-16	TRUE	ZDBp912	8.03441674669657e-10
81	4335469	4337081	404	603	488.718808193669	1612	1.85661764705882	2.77113970588235	2.24595040530179	1.01617031729282e-14	TRUE	ZDBp912	4.63284241697604e-08
82	4344544	4345823	392	589	506.524256651017	1279	1.80147058823529	2.70680147058824	2.32777691475651	2.78363066262207e-11	TRUE	ZDBp912	0.000126909062265736
83	4353625	4354992	395	599	480.918008784773	1367	1.81525735294118	2.75275735294118	2.21010114331238	8.84260252139519e-13	TRUE	ZDBp912	4.03144860073433e-06
84	4355531	4356434	396	608	476.935698447894	903	1.81985294117647	2.79411764705882	2.19180008477892	8.40589820581562e-09	TRUE	ZDBp912	0.0383234986280981
85	4359649	4361017	392	668	525.601316752012	1368	1.80147058823529	3.06985294117647	2.41544722772064	1.33409901407509e-12	TRUE	ZDBp912	6.08231749705002e-06
86	4361032	4362255	391	602	472.142389525368	1223	1.796875	2.76654411764706	2.16977201068643	3.14327386109378e-11	TRUE	ZDBp912	0.000143305627255899
87	625464	628396	397	1027	715.676219720232	2932	2.68243243243243	6.93918918918919	4.83565013324481	6.51412687180735e-45	TRUE	ZDBp913	3.00313299925032e-38
88	3484607	3486410	289	721	517.633185349611	1803	1.9527027027027	4.87162162162162	3.49752152263251	4.17873916208853e-17	TRUE	ZDBp913	1.92647606039731e-10
89	3486597	3492325	286	629	462.538152610442	5728	1.93243243243243	4.25	3.12525778790839	1.20209517732263e-51	TRUE	ZDBp913	5.54188115506511e-45
90	3492429	3496377	287	728	496.355966556879	3948	1.93918918918919	4.91891891891892	3.35375653078972	8.79818586258985e-36	TRUE	ZDBp913	4.05612644909238e-29
91	3496382	3498499	284	566	426.901228733459	2117	1.91891891891892	3.82432432432432	2.88446776171256	2.96197816074639e-19	TRUE	ZDBp913	1.36552672870006e-12
92	3499188	3505392	287	693	484.774947605997	6204	1.93918918918919	4.68243243243243	3.27550640274322	5.24812964250643e-56	TRUE	ZDBp913	2.41948485559385e-49
93	3505396	3512770	287	733	457.90302454903	7374	1.93918918918919	4.9527027027027	3.09393935506102	8.5834914724958e-67	TRUE	ZDBp913	3.9571483634128e-60
94	3512813	3514331	290	544	409.503625576796	1518	1.95945945945946	3.67567567567568	2.76691638903241	1.85173513505686e-14	TRUE	ZDBp913	8.5368415436121e-08
95	3514403	3517291	283	558	424.63179771389	2888	1.91216216216216	3.77027027027027	2.86913376833709	1.02583813171363e-25	TRUE	ZDBp913	4.72930356725421e-19
96	3517363	3527090	283	599	440.624511618343	9727	1.91216216216216	4.0472972972973	2.97719264606988	6.71107166354881e-85	TRUE	ZDBp913	3.09392819172178e-78
97	3528749	3532002	286	605	445.236162361624	3253	1.93243243243243	4.08783783783784	3.00835244838935	7.24379596728549e-29	TRUE	ZDBp913	3.33952395114401e-22
98	3532086	3548912	283	692	469.124457652303	16826	1.91216216216216	4.67567567567568	3.16975984900205	4.97606200973728e-148	TRUE	ZDBp913	2.29405664363607e-141
99	3548963	3556080	287	680	482.864109050028	7117	1.93918918918919	4.59459459459459	3.26259533141911	4.26824287164786e-64	TRUE	ZDBp913	1.96773892632279e-57
100	3556751	3561763	284	630	448.548792656156	5012	1.91891891891892	4.25675675675676	3.03073508551457	2.11773448371044e-44	TRUE	ZDBp913	9.76314775078461e-38
101	3617860	3623496	285	740	463.081100266193	5636	1.92567567567568	5	3.12892635314996	5.32388898661971e-50	TRUE	ZDBp913	2.45441131477794e-43
102	3623954	3628214	286	650	457.045315801831	4260	1.93243243243243	4.39189189189189	3.08814402568805	3.01963844241805e-38	TRUE	ZDBp913	1.39210918526591e-31
103	625464	628396	342	1041	692.863868986694	2932	2.02846975088968	6.17437722419929	4.10951286468976	5.24167658599087e-30	TRUE	ZDBp914	2.37932909263122e-23
104	645071	646273	315	488	381.777685262281	1202	1.86832740213523	2.8944246737841	2.26439908221994	2.45320557518806e-11	TRUE	ZDBp914	0.000111357183135836
105	648751	651858	315	513	395.66806181584	3107	1.86832740213523	3.04270462633452	2.3467856572707	2.98081386403761e-27	TRUE	ZDBp914	1.35306652939604e-20
106	653039	654599	317	498	406.81526619628	1560	1.88018979833926	2.95373665480427	2.41290193473475	3.81047643077708e-14	TRUE	ZDBp914	1.72967127593577e-07
107	654721	655878	315	477	382.657439446367	1157	1.86832740213523	2.82918149466192	2.26961707856683	5.20016591253595e-10	TRUE	ZDBp914	0.00236048635188107
108	655914	657246	315	496	377.818181818182	1332	1.86832740213523	2.94187425860024	2.24091448290737	2.45320557518806e-11	TRUE	ZDBp914	0.000111357183135836
109	657463	658607	314	434	374.725284339458	1144	1.86239620403321	2.57413997627521	2.22256989525182	5.89596127355612e-10	TRUE	ZDBp914	0.00267632540029122
110	660804	662195	313	444	365.06618705036	1391	1.8564650059312	2.63345195729537	2.16527987574353	1.59800799606666e-12	TRUE	ZDBp914	7.25376099216158e-06
111	625951	628342	230	671	428.614225941423	2391	1.77880897138438	5.18948182521268	3.31488187116336	1.09005054405194e-20	TRUE	ZDBp915	4.94903548954863e-14
112	644299	646290	230	480	316.093969849246	1991	1.77880897138438	3.7122969837587	2.44465560594931	5.00173199976458e-18	TRUE	ZDBp915	2.27088086062792e-11
113	648544	650028	231	340	279.02157788267	1484	1.78654292343387	2.62954369682908	2.15793950411965	8.26814581036631e-13	TRUE	ZDBp915	3.75389446586212e-06
114	650042	651872	231	395	300.586659376709	1830	1.78654292343387	3.05491105955143	2.32472281033804	7.76028198568038e-17	TRUE	ZDBp915	3.52331469082842e-10
115	653030	656120	229	418	304.944966008417	3090	1.77107501933488	3.23279195668987	2.35842974484468	4.13167462135017e-27	TRUE	ZDBp915	1.87585836674332e-20
116	656171	657160	231	394	294.072874493927	989	1.78654292343387	3.04717710750193	2.27434551039387	8.80924627064108e-09	TRUE	ZDBp915	0.0399956430162557
117	658972	660259	229	343	287.604976671851	1287	1.77107501933488	2.65274555297757	2.22432309877688	2.7954417366836e-11	TRUE	ZDBp915	0.000126918338230318
118	660991	661967	230	332	289.483076923077	976	1.77880897138438	2.5676720804331	2.23884823606401	1.03509129063771e-08	TRUE	ZDBp915	0.0469951009174913
119	625464	628396	546	1420	995.551006482429	2932	2.67123287671233	6.94716242661448	4.87060179296688	6.43883616011957e-43	TRUE	ZDBp916	2.93265742894908e-36
120	650173	651591	397	587	476.935779816514	1418	1.94227005870841	2.87181996086106	2.33334530242913	1.54641128601864e-12	TRUE	ZDBp916	7.04334515334067e-06
121	653041	654217	399	590	477.43829787234	1176	1.95205479452055	2.88649706457926	2.33580380563767	5.41738083687539e-10	TRUE	ZDBp916	0.00246742140374853
122	660554	661543	401	571	478.26012145749	989	1.96183953033268	2.79354207436399	2.33982446897011	9.74329902091291e-09	TRUE	ZDBp916	0.0443772097093118
123	664848	665751	401	566	466.364745011086	903	1.96183953033268	2.76908023483366	2.28162791101314	9.74329902091291e-09	TRUE	ZDBp916	0.0443772097093118
124	2696543	2698663	399	641	489.966021708353	2120	1.95205479452055	3.13600782778865	2.39709403966905	2.93480151317447e-19	TRUE	ZDBp916	1.33669614291635e-12
125	2700206	2701880	398	570	492.092050209205	1674	1.94716242661448	2.78864970645793	2.407495353274	3.17544451107768e-15	TRUE	ZDBp916	1.44630034124903e-08
126	2704984	2708244	397	650	505.484197606628	3260	1.94227005870841	3.18003913894325	2.47301466539446	2.76540254421733e-28	TRUE	ZDBp916	1.25954102785915e-21
127	2710690	2714970	397	664	511.777284412246	4280	1.94227005870841	3.24853228962818	2.50380276131236	1.80168063546044e-37	TRUE	ZDBp916	8.20600488781291e-31
128	625464	628342	309	808	557.573861661453	2878	1.77077363896848	4.63037249283668	3.19526568287366	6.9539289169259e-26	TRUE	ZDBp917	3.15055468442426e-19
129	1530847	1537125	622	1079	823.184642345069	6278	3.56446991404011	6.18338108882521	4.71739050054481	1.26118591173725e-188	TRUE	ZDBp917	5.71394276476184e-182
130	625464	628396	353	975	688.314568406687	2932	1.87566418703507	5.18065887353879	3.6573568990791	8.34058939469998e-28	TRUE	ZDBp918	3.83698889801793e-21
131	3484611	3486413	345	917	639.462520821766	1802	1.83315621679065	4.87247608926674	3.39778172593924	4.36819144344899e-17	TRUE	ZDBp918	2.00953449208053e-10
132	3486590	3492362	344	822	629.178825160284	5772	1.8278427205101	4.36769394261424	3.34313934729163	3.06343858887342e-52	TRUE	ZDBp918	1.40929846789201e-45
133	3492412	3496362	344	888	617.316789060522	3950	1.8278427205101	4.71838469713071	3.28011046259576	5.67181516700649e-36	TRUE	ZDBp918	2.60925107298085e-29
134	3496366	3498595	345	750	540.192998204668	2229	1.83315621679065	3.98512221041445	2.87031348674106	8.1975726538739e-20	TRUE	ZDBp918	3.77119574830011e-13
135	3499214	3512764	340	983	625.376559155657	13550	1.80658873538789	5.22316684378321	3.32293602101837	5.59917246036611e-120	TRUE	ZDBp918	2.57583266023915e-113
136	3512766	3514331	338	633	492.039641943734	1565	1.79596174282678	3.3634431455898	2.61445080735247	7.98123614747412e-14	TRUE	ZDBp918	3.67167271293531e-07
137	3514405	3527092	345	789	564.237111776762	12687	1.83315621679065	4.192348565356	2.99807179477557	3.03467122498849e-115	TRUE	ZDBp918	1.39606438446838e-108
138	3528383	3532048	340	782	572.944050218341	3665	1.80658873538789	4.15515409139214	3.0443360797999	1.5830684434411e-32	TRUE	ZDBp918	7.28271798890602e-26
139	3532052	3556448	339	976	641.583808157409	24396	1.80127523910733	5.18597236981934	3.40905317830717	3.81150677440139e-214	TRUE	ZDBp918	1.75343833463274e-207
140	3556689	3560803	351	809	637.536591295891	4114	1.86503719447396	4.29861849096706	3.3875483065669	8.69567015502806e-39	TRUE	ZDBp918	4.00033957634581e-32
141	3631769	3632740	344	1014	744.670103092784	971	1.8278427205101	5.38788522848034	3.95680182302223	7.349259027523e-09	TRUE	ZDBp918	0.0338093915942953
142	625464	628320	282	521	398.053590192644	2856	2.06291148500366	3.81126554498903	2.91187703140193	1.15606574933701e-25	TRUE	ZDBp919	5.33516135252209e-19
143	1510413	1513414	286	2351	1654.73166666667	3001	2.09217264081931	17.1982443306511	12.1048402828578	1.44579469750857e-27	TRUE	ZDBp919	6.67223987757854e-21
144	1513472	1542444	295	2460	1750.82731006869	28972	2.15801024140454	17.9956108266277	12.8078076815559	1.20184020819885e-272	TRUE	ZDBp919	5.54640723018291e-266
145	3502848	3504269	284	434	354.578873239437	1421	2.07754206291149	3.17483540599854	2.59384691469961	1.13512755032994e-12	TRUE	ZDBp919	5.23853305071661e-06
146	3506051	3507593	282	476	336.545100584036	1542	2.06291148500366	3.48207754206291	2.46192465679617	7.50332858702766e-14	TRUE	ZDBp919	3.4627328692803e-07
147	3519297	3520514	284	395	329.601151315789	1217	2.07754206291149	2.8895391367959	2.41112766141763	2.41135928620971e-11	TRUE	ZDBp919	0.000111282518993485
148	3522079	3523009	285	404	347.410118406889	930	2.0848573518654	2.95537673738113	2.54140540165976	9.82630256264535e-09	TRUE	ZDBp919	0.0453476886591263
149	3525508	3526447	285	429	361.382729211087	939	2.0848573518654	3.13825896122897	2.64361908713305	9.82630256264535e-09	TRUE	ZDBp919	0.0453476886591263
150	3535441	3536580	287	442	366.571177504394	1139	2.09948792977323	3.23335771762985	2.68157408562102	3.58282850488275e-10	TRUE	ZDBp919	0.001653449916921
151	3539255	3540414	283	462	361.507772020725	1159	2.07022677395757	3.37966349670812	2.64453381141716	5.7691132174622e-10	TRUE	ZDBp919	0.00266240478915496
152	3541765	3544094	282	450	355.783934707904	2329	2.06291148500366	3.29188002926116	2.60266228754867	2.05532709899509e-20	TRUE	ZDBp919	9.48518863363832e-14
153	3544361	3546127	288	464	355.471954674221	1766	2.10680321872714	3.39429407461595	2.60038006345443	1.18885578639146e-15	TRUE	ZDBp919	5.48648504543577e-09
154	3546686	3548605	284	464	341.72732012513	1919	2.07754206291149	3.39429407461595	2.49983409016189	1.18411228233601e-16	TRUE	ZDBp919	5.46459411100862e-10
155	3550758	3555659	282	482	362.336326530612	4901	2.06291148500366	3.52596927578639	2.65059492707105	1.0018730393779e-42	TRUE	ZDBp919	4.62357294374321e-36
156	3558612	3560449	282	436	339.710239651416	1837	2.06291148500366	3.18946598390636	2.48507856365337	1.77952772494255e-16	TRUE	ZDBp919	8.21239410414139e-10
157	3560566	3561986	285	443	351.345313601128	1420	2.0848573518654	3.24067300658376	2.57019249159567	9.74058854584934e-13	TRUE	ZDBp919	4.49521245573079e-06
158	3562017	3563434	282	553	366.492937853107	1417	2.06291148500366	4.04535479151427	2.68100173996421	1.5407372020675e-12	TRUE	ZDBp919	7.11039279520016e-06
159	3565913	3567182	285	412	339.56309148265	1269	2.0848573518654	3.01389904901244	2.48400213227981	2.10468372708588e-11	TRUE	ZDBp919	9.71296596795669e-05
160	3567280	3569598	282	452	348.651273198101	2318	2.06291148500366	3.30651060716898	2.55048480759401	2.05532709899509e-20	TRUE	ZDBp919	9.48518863363832e-14
161	3571636	3573839	282	430	346.151226158038	2203	2.06291148500366	3.14557425018288	2.53219624109757	4.22041882760416e-19	TRUE	ZDBp919	1.94769332396564e-12
162	3573868	3575057	282	451	350.063131313131	1189	2.06291148500366	3.29919531821507	2.56081295766738	6.49647506545216e-10	TRUE	ZDBp919	0.0029980771177332
163	3579364	3580687	284	439	364.765506807867	1323	2.07754206291149	3.21141185076811	2.66836508272031	2.41135928620971e-11	TRUE	ZDBp919	0.000111282518993485
164	625464	628396	479	1266	903.865233708632	2932	2.07809110629067	5.49240780911063	3.92132422433246	9.97949987421977e-39	TRUE	ZDBp920	4.51577159468384e-32
165	625464	628396	828	2588	1628.58375980894	2932	2.92682926829268	9.14810887239307	5.756747118448	2.38920038458415e-85	TRUE	ZDBp921	1.08113252654744e-78
