# Supplementary material for: Genomic and phenotypic evolution of Escherichia coli in a novel citrate-only resource environment
Source: eLife. 2020 May 29;9:e55414. doi: 10.7554/eLife.55414 (PMC7299349; doi:10.7554/eLife.55414)
Supplement: Table 1—source data 1. [file elife-55414-table1-data1.csv]

	Gene	Genome	amplified.segment.length	copy.number.mean	copy.number.min	copy.number.max	bonferroni.corrected.pval
1	citT	CZB151	2932	4.20942840179778	3.38582677165354	5.47244094488189	6.05775213463096e-12
2	citT	CZB152	2932	8.22828682894991	5.17391304347826	11.4565217391304	2.73361583813371e-49
3	citT	CZB154	9887	4.14391743292894	1.72258064516129	9.83225806451613	3.4530313957107e-39
4	citT	ZDBp871	2835	2.82439950309025	1.69890664423886	4.25567703952902	2.81956795760733e-18
5	citT	ZDBp875	2932	11.3662244877209	8.04635761589404	14.9337748344371	1.49004125260716e-41
6	citT	ZDBp877	2932	7.67739304823959	3.65853658536585	11.3333333333333	6.87813660769761e-19
7	citT	ZDBp880	2932	3.82420204582703	1.78527607361963	5.92638036809816	1.80002330494388e-23
8	citT	ZDBp883	8442	5.07535873405296	1.88065099457505	12.8119349005425	3.57594903129793e-32
9	citT	ZDBp886	2932	4.76207515401664	2.26738934056007	6.88346883468835	1.07769058901277e-30
10	citT	ZDBp889	2932	4.66284961687964	2.89956331877729	7.10917030567686	4.9902618090168e-21
11	citT	ZDBp892	2932	5.69434556461764	2.21282593375617	8.75968992248062	2.66716723721945e-36
12	citT	ZDBp895	2932	5.29946251712083	2.1304347826087	8.50724637681159	1.52998057042989e-14
13	citT	ZDBp898	2932	6.14203474979206	2.76747503566334	9.72895863052782	2.79811914232268e-58
14	citT	ZDBp901	2932	3.90740076306768	1.82756840474961	5.64274651522974	1.07375156216471e-24
15	citT	ZDBp904	2932	3.83573720220945	1.77731312075274	5.67694720334553	7.86877571795489e-24
16	citT	ZDBp910	2932	4.71366097686345	2.40135287485908	6.47313040210447	8.99832728920761e-65
17	citT	ZDBp911	2889	3.1277129310081	1.57803867403315	5.00690607734807	2.50133439448533e-21
18	citT	ZDBp912	2932	8.93013263391334	4.50827205882353	13.4053308823529	1.19434274847479e-110
19	citT	ZDBp913	2932	4.83565013324481	2.68243243243243	6.93918918918919	3.00313299925032e-38
20	citT	ZDBp914	2932	4.10951286468976	2.02846975088968	6.17437722419929	2.37932909263122e-23
21	citT	ZDBp915	2391	3.31488187116336	1.77880897138438	5.18948182521268	4.94903548954863e-14
22	citT	ZDBp916	2932	4.87060179296688	2.67123287671233	6.94716242661448	2.93265742894908e-36
23	citT	ZDBp917	2878	3.19526568287366	1.77077363896848	4.63037249283668	3.15055468442426e-19
24	citT	ZDBp918	2932	3.6573568990791	1.87566418703507	5.18065887353879	3.83698889801793e-21
25	citT	ZDBp919	2856	2.91187703140193	2.06291148500366	3.81126554498903	5.33516135252209e-19
26	citT	ZDBp920	2932	3.92132422433246	2.07809110629067	5.49240780911063	4.51577159468384e-32
27	citT	ZDBp921	2932	5.756747118448	2.92682926829268	9.14810887239307	1.08113252654744e-78
28	dctA	ZDBp880	4585	2.33266014625424	1.66871165644172	3.25766871165644	5.21939923545956e-34
29	dctA	ZDBp886	7200	3.19955986057985	1.87895212285456	4.25474254742547	7.11260309414734e-60
30	dctA	ZDBp898	1073	2.23906546085549	1.71184022824536	2.88159771754636	0.00226519669917461
31	dctA	ZDBp898	1113	2.09363678814438	1.71184022824536	2.76034236804565	0.00226519669917461
32	dctA	ZDBp913	16826	3.16975984900205	1.91216216216216	4.67567567567568	2.29405664363607e-141
33	dctA	ZDBp918	24396	3.40905317830717	1.80127523910733	5.18597236981934	1.75343833463274e-207
34	dctA	ZDBp919	2329	2.60266228754867	2.06291148500366	3.29188002926116	9.48518863363832e-14
35	maeA	ZDBp883	11127	58.4666766243902	22.6130198915009	95.4611211573237	0
36	maeA	ZDBp889	24096	34.7128185285501	2.34934497816594	55.3886462882096	5.46255782972341e-151
37	maeA	ZDBp904	13164	28.075876721881	15.2953476215369	44.7151071615264	0
38	maeA	ZDBp911	7410	2.22232470364176	1.53660220994475	3.39088397790055	1.57842854996038e-59
39	maeA	ZDBp917	6278	4.71739050054481	3.56446991404011	6.18338108882521	5.71394276476184e-182
40	maeA	ZDBp919	28972	12.8078076815559	2.15801024140454	17.9956108266277	5.54640723018291e-266
